# Supplementary material for: FOXO1 unlocks SMAD function to drive mechano-induced endothelial-to-mesenchymal transition
Source: Research Square preprint supplement (doi:10.21203/rs.3.rs-8347032/v1), 2026-01-14
Supplement: Supplementary file 1 [file 83f8a5e9b6c810f28666ed58.xlsx]

## Sheet: Overview
Mendez, Raaz et al., FOXO1 unlocks SMAD function to drive mechano-induced endothelial-to-mesenchymal transition
Supplementary table 1
Index
Sheet	Content	Remarks
RNAseq_HAoEC_OS-PS	Differential gene expression analysis from RNAseq data of HAoECs exposed to OS or PS for 24 hrs.	Fold change > 0 means higher expression in OS
ATACseq_HAoEC_OS-PS	Differential accessibility analysis fromATACseq of HAoECs exposed to OS or PS for 24 hrs.	Promoter peaks only. Fold change >0 means higher accessibility in OS
FOXO1_inhib_RNAseq	Differential gene expression analysis from RNAseq data of HAoECs exposed to OS for 24 hrs in presence of FOXO1 inhibitor or DMSO control	Fold change > 0 means higher expression in DMSo control
FOXO1_inhib_ATAC	FDRs (padj < 0.25) from differential accessibility analysis of HAoECs exposed to OS or PS for 24 hrs	Fold change < 0 means higher accessibility in DMSO control
FOXO1_inhib_SMAD23_CR	Differential binding analysis of SMAD2/3 CUT&RUN data from all called peaks in HAoECs exposed to OS for 24 hrs in presence of FOXO1 inhibitor or DMSO
FOXO1_inhib_SMAD1_CR	Differential binding analysis of SMAD1 CUT&RUN data from all called peaks in HAoECs exposed to OS for 24 hrs in presence of FOXO1 inhibitor or DMSO
Abbreviations
OS	Oscillatory Flow
PS	Pulsatile Flow
HAoECs	Human Aortic Endotheial Cells
CR	CUT&RUN

## Sheet: RNAseq_HAoEC_OS-PS
Row.names	baseMean	log2FoldChange	lfcSE	stat	pvalue	padj	hgnc_symbol
ENSG00000000003	2265.47	0.173179	0.122931	1.40874	0.158911	0.477554	TSPAN6
ENSG00000000419	1165.47	0.0160831	0.129905	0.123806	0.901469	0.978293	DPM1
ENSG00000000457	396.636	0.116824	0.177248	0.6591	0.509831	0.820007	SCYL3
ENSG00000000460	333.683	0.309733	0.248552	1.24615	0.212709	0.559697	FIRRM
ENSG00000000938	63.853	-3.25833	0.690808	-4.71669	2.39707e-06	6.7563e-05	FGR
ENSG00000000971	10030.1	0.0247289	0.145295	0.170198	0.864855	0.967428	CFH
ENSG00000001036	2543.98	0.0927358	0.114518	0.809795	0.418058	0.760542	FUCA2
ENSG00000001084	955.824	-0.0281532	0.226593	-0.124246	0.901121	0.978262	GCLC
ENSG00000001167	1121.25	0.403865	0.119637	3.37575	0.000736155	0.00940162	NFYA
ENSG00000001460	292.334	-0.783369	0.189903	-4.12511	3.70562e-05	0.000736224	STPG1
ENSG00000001461	1529.05	-0.545561	0.119356	-4.57086	4.85725e-06	0.000125274	NIPAL3
ENSG00000001497	912.767	0.11514	0.133381	0.863242	0.388004	0.737237	LAS1L
ENSG00000001561	915.007	-0.0783814	0.168799	-0.464349	0.642398	0.889408	ENPP4
ENSG00000001617	5379.46	-0.927815	0.125119	-7.41545	1.21209e-13	1.33808e-11	SEMA3F
ENSG00000001626	0.3331	0	4.08052	0	1	NA	CFTR
ENSG00000001629	2697.49	-0.243189	0.135471	-1.79513	0.0726323	0.299236	ANKIB1
ENSG00000001630	3870.57	-0.0235219	0.142953	-0.164543	0.869304	0.968347	CYP51A1
ENSG00000001631	1421.07	-0.145418	0.10082	-1.44235	0.149203	0.460921	KRIT1
ENSG00000002016	186.937	0.259564	0.251884	1.03049	0.302778	0.662973	RAD52
ENSG00000002330	662.028	0.132593	0.154993	0.855478	0.392287	0.739821	BAD
ENSG00000002549	6419.41	-0.23953	0.144912	-1.65293	0.0983444	0.362712	LAP3
ENSG00000002586	15993.9	-0.0955697	0.0829463	-1.15219	0.249244	0.603319	CD99
ENSG00000002587	163.724	-1.09795	0.563549	-1.94828	0.0513813	0.237465	HS3ST1
ENSG00000002746	16.2476	-2.26393	1.25825	-1.79927	0.0719763	0.297243	HECW1
ENSG00000002822	330.78	0.0200257	0.168094	0.119134	0.905169	0.979659	MAD1L1
ENSG00000002834	14095.3	0.0626844	0.0992326	0.631691	0.527589	0.829199	LASP1
ENSG00000002919	586.118	-0.108976	0.128095	-0.850745	0.394911	0.741935	SNX11
ENSG00000003056	2949.27	0.0947925	0.0829463	1.14282	0.253114	0.608342	M6PR
ENSG00000003096	996.381	-0.0559077	0.172584	-0.323945	0.745979	0.931963	KLHL13
ENSG00000003137	8.68506	-2.1342	1.30881	-1.63064	0.102966	NA	CYP26B1
ENSG00000003147	1931.6	0.163237	0.142966	1.14179	0.25354	0.608865	ICA1
ENSG00000003249	1374.47	0.0713318	0.131654	0.541813	0.587947	0.862275	DBNDD1
ENSG00000003393	2361.13	0.0171201	0.118255	0.144773	0.88489	0.973934	ALS2
ENSG00000003400	2245.26	0.190701	0.139152	1.37045	0.170546	0.495566	CASP10
ENSG00000003402	15500.8	-0.31266	0.0965205	-3.23931	0.00119817	0.0137804	CFLAR
ENSG00000003436	19887.5	0.460213	0.178641	2.57619	0.00998969	0.0728144	TFPI
ENSG00000003509	616.309	-0.483356	0.193544	-2.49739	0.012511	0.0857529	NDUFAF7
ENSG00000003756	4974.65	0.0325129	0.0871963	0.37287	0.709245	0.917152	RBM5
ENSG00000003987	29.5285	1.60897	0.665567	2.41744	0.0156303	0.101364	MTMR7
ENSG00000003989	4842.37	0.796287	0.474148	1.67941	0.0930729	0.349703	SLC7A2
ENSG00000004059	1777.86	0.163618	0.0997908	1.63961	0.101087	0.368825	ARF5
ENSG00000004139	424.414	0.68295	0.204227	3.34407	0.000825597	0.0103178	SARM1
ENSG00000004142	2819.84	0.0791759	0.103726	0.763318	0.445274	0.778163	POLDIP2
ENSG00000004399	20489.2	-0.0837692	0.0814805	-1.02809	0.303908	0.663549	PLXND1
ENSG00000004455	3101.7	0.0452829	0.114147	0.396708	0.691583	0.910777	AK2
ENSG00000004468	7.27286	-0.715653	1.256	-0.569788	0.568822	NA	CD38
ENSG00000004478	1807.78	0.0933261	0.138887	0.671955	0.501612	0.81432	FKBP4
ENSG00000004487	3356.23	0.075882	0.0902041	0.841225	0.400222	0.747446	KDM1A
ENSG00000004534	3087.09	0.126723	0.0852963	1.48568	0.137363	0.44099	RBM6
ENSG00000004660	414.992	-0.998577	0.230901	-4.3247	1.52742e-05	0.000337236	CAMKK1
ENSG00000004700	3627.39	0.0176109	0.121716	0.144689	0.884956	0.973934	RECQL
ENSG00000004766	956.845	-0.161152	0.127485	-1.26408	0.2062	0.550926	VPS50
ENSG00000004776	69.6783	-0.245836	0.434993	-0.565149	0.571972	0.852837	HSPB6
ENSG00000004777	140.317	0.827077	0.310251	2.66583	0.00767978	0.0593043	ARHGAP33
ENSG00000004779	1113	-0.0586711	0.120391	-0.48734	0.626018	0.88164	NDUFAB1
ENSG00000004799	1545.33	0.287222	0.283597	1.01278	0.311165	0.670468	PDK4
ENSG00000004838	2.5264	1.58244	2.82838	0.559487	0.57583	NA	ZMYND10
ENSG00000004846	18.2067	-0.340276	0.69177	-0.491892	0.622795	0.880677	ABCB5
ENSG00000004864	1303.62	0.0724651	0.108368	0.668692	0.503692	0.815624	SLC25A13
ENSG00000004866	924.359	-0.0555908	0.128054	-0.434121	0.664201	0.900012	ST7
ENSG00000004897	6397.25	0.023682	0.0872989	0.271274	0.78618	0.943894	CDC27
ENSG00000004939	16.7468	0.127444	0.736609	0.173014	0.86264	0.966879	SLC4A1
ENSG00000004961	1003.89	-0.0433324	0.110324	-0.392773	0.694487	0.911527	HCCS
ENSG00000004975	766.087	-0.208812	0.170412	-1.22533	0.22045	0.570181	DVL2
ENSG00000005007	2941.1	0.090293	0.0834482	1.08202	0.279242	0.636843	UPF1
ENSG00000005020	1746.57	-0.0319995	0.158652	-0.201696	0.840154	0.960591	SKAP2
ENSG00000005022	6259.86	0.204366	0.10575	1.93253	0.0532938	0.243219	SLC25A5
ENSG00000005059	1142.33	-0.477493	0.160769	-2.97005	0.00297751	0.0291587	MCUB
ENSG00000005073	18.6568	0.202385	1.3143	0.153987	0.87762	0.971369	HOXA11
ENSG00000005075	857.094	0.00898104	0.123096	0.0729597	0.941838	0.988467	POLR2J
ENSG00000005100	1638.96	0.0593674	0.101904	0.582579	0.560177	0.846427	DHX33
ENSG00000005102	2.79943	0.47945	1.53428	0.312491	0.754667	NA	MEOX1
ENSG00000005108	2590.71	0.0818874	0.190107	0.430745	0.666654	0.901197	THSD7A
ENSG00000005156	1001.23	0.102278	0.166948	0.612634	0.540119	0.836587	LIG3
ENSG00000005175	1102.83	0.0681963	0.150083	0.454391	0.649547	0.892648	RPAP3
ENSG00000005187	266.138	2.20913	0.387595	5.69957	1.20107e-08	5.71961e-07	ACSM3
ENSG00000005189	122.948	0.430643	0.357553	1.20442	0.228428	0.580108	REXO5
ENSG00000005194	1555.47	-0.0365728	0.102863	-0.355547	0.72218	0.922812	CIAPIN1
ENSG00000005206	990.922	-0.155653	0.122069	-1.27512	0.202266	0.544609	SPPL2B
ENSG00000005238	1654.73	-0.366289	0.12202	-3.00188	0.00268315	0.0267068	ATOSB
ENSG00000005243	177.913	-0.283902	0.224698	-1.26348	0.206417	0.551303	COPZ2
ENSG00000005249	5003.49	0.08704	0.143476	0.606653	0.544081	0.839006	PRKAR2B
ENSG00000005302	889.151	-0.0154552	0.242514	-0.0637288	0.949186	0.990095	MSL3
ENSG00000005339	4389.44	0.151867	0.112082	1.35496	0.175431	0.504047	CREBBP
ENSG00000005379	0.955089	-2.44292	3.40663	-0.717107	0.473308	NA	TSPOAP1
ENSG00000005381	1.98888	3.06808	2.75719	1.11276	0.265813	NA	MPO
ENSG00000005421	0.855335	2.188	3.99018	0.548345	0.583455	NA	PON1
ENSG00000005436	838.739	-0.0250701	0.126417	-0.198312	0.842801	0.961203	GCFC2
ENSG00000005448	275.564	0.121769	0.23726	0.51323	0.60779	0.873854	WDR54
ENSG00000005469	508.789	-0.340946	0.200735	-1.69849	0.0894156	0.340713	CROT
ENSG00000005471	10.6545	-1.51282	1.08489	-1.39445	0.163183	NA	ABCB4
ENSG00000005483	4966.21	-0.136241	0.0941933	-1.4464	0.148066	0.459557	KMT2E
ENSG00000005486	1112.09	0.00812033	0.148172	0.0548033	0.956295	0.992178	RHBDD2
ENSG00000005513	5.7905	-0.0843501	1.29726	-0.0650216	0.948157	NA	SOX8
ENSG00000005700	3055.78	0.0334512	0.106782	0.313266	0.754079	0.935112	IBTK
ENSG00000005801	572.927	0.0301889	0.139958	0.215699	0.829222	0.956573	ZNF195
ENSG00000005810	7467.37	0.0445841	0.107077	0.416375	0.677136	0.904043	MYCBP2
ENSG00000005812	2532.12	-0.147306	0.131831	-1.11739	0.26383	0.619385	FBXL3
ENSG00000005844	9.46801	-0.505857	1.0702	-0.472676	0.636445	NA	ITGAL
ENSG00000005882	609.942	-0.0583763	0.201594	-0.289574	0.772142	0.941246	PDK2
ENSG00000005884	6986.37	-0.37838	0.132308	-2.85984	0.0042386	0.0376157	ITGA3
ENSG00000005889	1989.44	-0.0784745	0.152543	-0.514442	0.606943	0.873432	ZFX
ENSG00000005893	9211.76	-0.0384119	0.0825306	-0.465427	0.641626	0.889127	LAMP2
ENSG00000005961	17.753	-0.198298	0.640026	-0.309828	0.756692	0.936112	ITGA2B
ENSG00000005981	1.44031	0.0727106	2.32765	0.0312377	0.97508	NA	ASB4
ENSG00000006007	2917.25	-0.0357508	0.10665	-0.335218	0.737461	0.928722	GDE1
ENSG00000006015	331.46	-0.202238	0.173196	-1.16768	0.242934	0.594876	REX1BD
ENSG00000006016	4.49919	-3.51021	1.92234	-1.82601	0.0678493	NA	CRLF1
ENSG00000006025	544.788	-0.373159	0.155817	-2.39485	0.016627	0.106035	OSBPL7
ENSG00000006042	2200.32	0.118991	0.123694	0.961974	0.336063	0.692957	TMEM98
ENSG00000006047	1.635	1.79265	3.91661	0.457706	0.647164	NA	YBX2
ENSG00000006062	315.294	-0.562879	0.196812	-2.85999	0.00423652	0.0376157	MAP3K14
ENSG00000006118	1896.01	-0.0676695	0.146779	-0.461029	0.644778	0.890039	TMEM132A
ENSG00000006125	15071	-0.0218543	0.0820356	-0.2664	0.789931	0.944258	AP2B1
ENSG00000006128	0.795172	-1.11534	3.97708	-0.280443	0.779138	NA	TAC1
ENSG00000006194	861.692	-0.0249104	0.119906	-0.20775	0.835424	0.958265	ZNF263
ENSG00000006210	477.109	0.514264	0.674585	0.762342	0.445856	0.778365	CX3CL1
ENSG00000006282	1557.69	-0.143102	0.152949	-0.935619	0.34947	0.704733	SPATA20
ENSG00000006283	2.0421	-3.48302	2.99082	-1.16457	0.244193	NA	CACNA1G
ENSG00000006327	897.752	0.633204	0.171255	3.69743	0.000217791	0.00337264	TNFRSF12A
ENSG00000006432	27.1387	-0.257091	0.54181	-0.474504	0.63514	0.886712	MAP3K9
ENSG00000006451	14941.9	0.146463	0.124133	1.17989	0.238045	0.589633	RALA
ENSG00000006453	6.51604	0.784721	1.32492	0.592279	0.553664	NA	BAIAP2L1
ENSG00000006459	934.311	-0.0869062	0.219643	-0.395671	0.692348	0.910879	KDM7A
ENSG00000006468	234.34	0.538638	0.313495	1.71817	0.0857651	0.332673	ETV1
ENSG00000006530	29.2875	0.8132	0.563632	1.44278	0.149081	0.46085	AGK
ENSG00000006534	38.7728	-0.238331	0.552528	-0.431346	0.666217	0.901197	ALDH3B1
ENSG00000006555	3.4498	-1.80206	1.73554	-1.03832	0.299119	NA	TTC22
ENSG00000006576	1040.63	-0.212953	0.142722	-1.49208	0.135679	0.438443	PHTF2
ENSG00000006607	1421.02	0.0269153	0.158143	0.170196	0.864856	0.967428	FARP2
ENSG00000006625	887.654	0.0389475	0.130468	0.298521	0.765306	0.940036	GGCT
ENSG00000006634	609.142	0.721096	0.175836	4.10097	4.11426e-05	0.000807992	DBF4
ENSG00000006638	118.12	-0.639552	0.28043	-2.28061	0.0225716	0.134086	TBXA2R
ENSG00000006652	1416.57	-0.386741	0.120118	-3.21969	0.0012833	0.0145868	IFRD1
ENSG00000006695	346.983	-0.0462134	0.198262	-0.233093	0.81569	0.953346	COX10
ENSG00000006704	580.84	0.216061	0.241378	0.895112	0.370727	0.72419	GTF2IRD1
ENSG00000006712	1439.04	0.0469961	0.118844	0.395445	0.692515	0.911006	PAF1
ENSG00000006715	3293.38	-0.216699	0.113342	-1.91189	0.0558899	0.251134	VPS41
ENSG00000006740	7.75263	-0.563723	1.22786	-0.459112	0.646154	NA	ARHGAP44
ENSG00000006744	2728.53	0.0102411	0.0968375	0.105756	0.915776	0.983405	ELAC2
ENSG00000006747	31.5043	0.124924	0.520462	0.240025	0.810311	0.952051	SCIN
ENSG00000006756	1444.68	0.553531	0.110392	5.01424	5.32436e-07	1.76735e-05	ARSD
ENSG00000006757	192.497	0.120041	0.241508	0.497047	0.619156	0.879928	PNPLA4
ENSG00000006831	4221.66	0.206955	0.126038	1.64201	0.100588	0.367637	ADIPOR2
ENSG00000006837	47.3533	-0.137048	0.444711	-0.308174	0.75795	0.936321	CDKL3
ENSG00000007038	1.29493	0.605698	3.00818	0.201351	0.840424	NA	PRSS21
ENSG00000007047	1618.29	-0.133962	0.0994398	-1.34717	0.177927	0.507785	MARK4
ENSG00000007062	1.40391	0.848834	2.55821	0.331807	0.740035	NA	PROM1
ENSG00000007080	924.181	-0.0714652	0.139375	-0.512754	0.608123	0.873854	CCDC124
ENSG00000007129	52.782	-0.851395	0.592001	-1.43817	0.150387	0.462329	CEACAM21
ENSG00000007168	8367.69	-0.120682	0.0980412	-1.23093	0.218347	0.567156	PAFAH1B1
ENSG00000007174	8.87642	-1.0079	0.914018	-1.10272	0.27015	NA	DNAH9
ENSG00000007202	10992.8	0.011562	0.0766568	0.150829	0.880111	0.972201	BLTP2
ENSG00000007237	9.16484	-0.218309	1.11391	-0.195983	0.844623	NA	GAS7
ENSG00000007255	137.364	0.311674	0.238404	1.30734	0.191099	0.527204	TRAPPC6A
ENSG00000007264	1.00213	-2.53169	3.94436	-0.64185	0.520971	NA	MATK
ENSG00000007312	4.44797	-0.620112	1.30991	-0.4734	0.635928	NA	CD79B
ENSG00000007314	13.1994	-2.91637	1.92734	-1.51316	0.13024	0.427119	SCN4A
ENSG00000007341	445.419	-0.0418712	0.214643	-0.195074	0.845335	0.962139	ST7L
ENSG00000007350	1.89288	-3.10387	2.52002	-1.23168	0.218068	NA	TKTL1
ENSG00000007372	1.60236	2.13197	2.42033	0.880859	0.378394	NA	PAX6
ENSG00000007376	618.407	0.0278689	0.169801	0.164127	0.869631	0.968347	RPUSD1
ENSG00000007384	1289.53	-0.0421879	0.143296	-0.294411	0.768444	0.940987	RHBDF1
ENSG00000007392	1542.49	0.101745	0.116691	0.871914	0.383255	0.733239	LUC7L
ENSG00000007402	4.50697	-1.60607	1.29709	-1.23822	0.215636	NA	CACNA2D2
ENSG00000007516	3.55496	1.58813	1.91747	0.82824	0.407534	NA	BAIAP3
ENSG00000007520	668.628	-0.117796	0.141092	-0.83489	0.403779	0.749885	TSR3
ENSG00000007541	796.937	-0.104121	0.141952	-0.733492	0.463258	0.790191	PIGQ
ENSG00000007545	1542.81	0.113179	0.116776	0.969189	0.332451	0.689186	CRAMP1
ENSG00000007866	15.8685	-0.473941	0.698096	-0.678905	0.497198	0.812344	TEAD3
ENSG00000007908	2218.34	-0.840274	1.13427	-0.740803	0.458813	0.7874	SELE
ENSG00000007923	1653.31	0.033237	0.114443	0.290424	0.771492	0.941102	DNAJC11
ENSG00000007933	13.0973	-0.306263	0.809393	-0.378386	0.705144	0.915583	FMO3
ENSG00000007944	890.788	-0.000688834	0.168468	-0.0040888	0.996738	1	MYLIP
ENSG00000007952	1.37372	-1.53671	2.58029	-0.595557	0.551471	NA	NOX1
ENSG00000007968	72.5876	1.56543	0.486448	3.21809	0.00129047	0.0146454	E2F2
ENSG00000008018	3381.72	-0.129247	0.0935595	-1.38144	0.167144	0.490261	PSMB1
ENSG00000008056	2.91693	1.58964	1.81585	0.875426	0.381342	NA	SYN1
ENSG00000008083	767.494	0.180831	0.153187	1.18046	0.237816	0.589627	JARID2
ENSG00000008086	476.881	0.0127582	0.188842	0.0675602	0.946136	0.989674	CDKL5
ENSG00000008118	0.475726	-1.91974	4.04417	-0.474694	0.635005	NA	CAMK1G
ENSG00000008128	819.623	-0.114996	0.137031	-0.8392	0.401357	0.748297	CDK11A
ENSG00000008130	2652.17	-0.447233	0.121946	-3.66747	0.000244961	0.00371443	NADK
ENSG00000008226	2.09551	-0.0256698	1.87561	-0.0136861	0.98908	NA	DLEC1
ENSG00000008256	942.472	-0.491853	0.128466	-3.82867	0.000128838	0.00213586	CYTH3
ENSG00000008277	55.0175	-0.390522	0.436032	-0.895627	0.370452	0.724011	ADAM22
ENSG00000008282	4373.92	-0.206187	0.0884387	-2.33141	0.0197319	0.121169	SYPL1
ENSG00000008283	1861.97	-0.00224639	0.129397	-0.0173604	0.986149	0.997996	CYB561
ENSG00000008294	9556.16	-0.626366	0.16667	-3.75813	0.000171188	0.00272978	SPAG9
ENSG00000008300	40.0905	-0.0950222	0.565539	-0.168021	0.866567	0.967746	CELSR3
ENSG00000008311	1546.81	0.519988	0.110377	4.71099	2.46511e-06	6.89474e-05	AASS
ENSG00000008323	0.595381	-0.441481	3.96103	-0.111456	0.911255	NA	PLEKHG6
ENSG00000008324	395.821	0.196216	0.188125	1.04301	0.296945	0.656263	SS18L2
ENSG00000008382	196.67	-0.348061	0.314347	-1.10725	0.268186	0.624481	MPND
ENSG00000008394	4241.74	-0.264176	0.105638	-2.50077	0.0123924	0.0853522	MGST1
ENSG00000008405	1184.73	0.13701	0.133655	1.0251	0.305315	0.664435	CRY1
ENSG00000008441	3675.21	-0.173506	0.113498	-1.52872	0.126334	0.42021	NFIX
ENSG00000008513	3677.35	-0.0917035	0.122507	-0.74856	0.454122	0.783809	ST3GAL1
ENSG00000008516	8.01673	-0.744643	1.12106	-0.664233	0.506541	NA	MMP25
ENSG00000008517	2378.19	-0.717953	0.440782	-1.62881	0.103352	0.373363	IL32
ENSG00000008710	1950.98	-0.28674	0.102336	-2.80195	0.00507952	0.0433045	PKD1
ENSG00000008735	18.9236	-0.199756	0.62679	-0.318697	0.749956	0.933702	MAPK8IP2
ENSG00000008838	2112.6	-0.0292177	0.12972	-0.225237	0.821795	0.954351	MED24
ENSG00000008853	783.739	0.26986	0.222221	1.21438	0.224604	0.576119	RHOBTB2
ENSG00000008869	2513.61	-0.125566	0.122357	-1.02623	0.304785	0.664103	HEATR5B
ENSG00000008952	5464.01	0.0291066	0.090692	0.320939	0.748257	0.933011	SEC62
ENSG00000008988	16171	0.258273	0.0827987	3.11929	0.00181288	0.0193781	RPS20
ENSG00000009307	24579.1	0.119677	0.0881198	1.35812	0.174425	0.503212	CSDE1
ENSG00000009335	5809.02	0.0317391	0.0856524	0.370557	0.710967	0.918146	UBE3C
ENSG00000009413	3734.64	0.191413	0.138376	1.38328	0.16658	0.489297	REV3L
ENSG00000009724	0.833358	0.268088	3.98941	0.0671998	0.946423	NA	MASP2
ENSG00000009765	32.4705	-0.0649139	0.473927	-0.13697	0.891054	0.975664	IYD
ENSG00000009780	375.959	-0.0147369	0.156595	-0.0941081	0.925023	0.985916	FAM76A
ENSG00000009830	716.124	-0.0691999	0.139317	-0.496709	0.619394	0.879928	POMT2
ENSG00000009844	2050.34	-0.167402	0.122136	-1.37063	0.170491	0.495566	VTA1
ENSG00000009950	33.0104	0.0695523	0.496477	0.140092	0.888587	0.974966	MLXIPL
ENSG00000009954	5147.68	0.0623915	0.0740815	0.8422	0.399676	0.747128	BAZ1B
ENSG00000010017	2737.78	-0.0368103	0.104809	-0.351211	0.72543	0.924278	RANBP9
ENSG00000010030	2.57946	-0.889889	2.29722	-0.387376	0.698478	NA	ETV7
ENSG00000010072	820.025	-0.226102	0.174473	-1.29592	0.195005	0.533287	SPRTN
ENSG00000010165	965.034	-0.0115499	0.188676	-0.0612154	0.951188	0.990738	METTL13
ENSG00000010219	586.489	-0.121545	0.202437	-0.600407	0.548235	0.840935	DYRK4
ENSG00000010244	7583.44	0.0892502	0.0847236	1.05343	0.292145	0.650143	ZNF207
ENSG00000010256	1979.16	0.145395	0.11916	1.22016	0.222402	0.572876	UQCRC1
ENSG00000010270	2458.84	0.0638715	0.0881654	0.724451	0.468789	0.793955	STARD3NL
ENSG00000010278	18710.9	-0.59664	0.152452	-3.91362	9.0921e-05	0.00158512	CD9
ENSG00000010292	2345.45	0.416284	0.118223	3.52117	0.00042965	0.00599699	NCAPD2
ENSG00000010295	819.779	-0.156712	0.160919	-0.973858	0.330127	0.687225	IFFO1
ENSG00000010310	14.674	0.952471	0.971374	0.980539	0.32682	0.683765	GIPR
ENSG00000010318	144.296	0.230358	0.284764	0.808944	0.418547	0.760862	PHF7
ENSG00000010319	872.065	-0.202542	0.534606	-0.378862	0.70479	0.915583	SEMA3G
ENSG00000010322	3640.8	0.184686	0.124321	1.48556	0.137397	0.441	NISCH
ENSG00000010327	8827.55	0.412079	0.127449	3.23328	0.00122378	0.0140196	STAB1
ENSG00000010361	126.173	-0.263025	0.270351	-0.972899	0.330604	0.687535	FUZ
ENSG00000010379	1.41921	0.235841	2.75375	0.0856438	0.93175	NA	SLC6A13
ENSG00000010404	3557.1	-0.146829	0.105173	-1.39607	0.162692	0.484718	IDS
ENSG00000010438	254.942	-0.744377	0.251006	-2.96558	0.00302115	0.0294279	PRSS3
ENSG00000010539	457.818	-0.19206	0.172871	-1.111	0.266567	0.622145	ZNF200
ENSG00000010626	83.8299	-0.627508	0.366693	-1.71126	0.0870328	0.335603	LRRC23
ENSG00000010671	12.1792	-2.25185	1.31343	-1.71448	0.0864407	0.334204	BTK
ENSG00000010704	276.692	-0.238318	0.249147	-0.956538	0.3388	0.695646	HFE
ENSG00000010803	1323.99	0.213909	0.102552	2.08586	0.036991	0.189934	SCMH1
ENSG00000010810	4963.13	0.0247996	0.089002	0.278641	0.78052	0.942759	FYN
ENSG00000010818	787.493	-0.454875	0.338788	-1.34266	0.179383	0.510442	HIVEP2
ENSG00000011007	2959.15	0.195357	0.116349	1.67906	0.0931395	0.349703	ELOA
ENSG00000011009	1696.45	0.159338	0.134995	1.18032	0.237873	0.589627	LYPLA2
ENSG00000011021	1228.74	-0.0758805	0.174178	-0.43565	0.66309	0.899167	CLCN6
ENSG00000011028	2643.17	-0.309253	0.147324	-2.09913	0.0358053	0.185678	MRC2
ENSG00000011052	128.678	1.11687	0.547573	2.03968	0.0413824	0.20511	NME1-NME2
ENSG00000011105	5230.47	-0.327654	0.0915312	-3.57969	0.000343997	0.0049484	TSPAN9
ENSG00000011114	10.4702	0	3.30474	0	1	NA	BTBD7
ENSG00000011132	320.519	-0.286441	0.242963	-1.17895	0.238418	0.59006	APBA3
ENSG00000011143	247.448	0.075221	0.22436	0.335269	0.737422	0.928722	MKS1
ENSG00000011198	55.9394	-0.557085	0.399233	-1.39539	0.162898	0.485033	ABHD5
ENSG00000011201	50.7778	0.930201	0.624626	1.48921	0.136431	0.439035	ANOS1
ENSG00000011243	1435.89	-0.0583719	0.133985	-0.435658	0.663085	0.899167	AKAP8L
ENSG00000011258	798.631	0.16608	0.139955	1.18667	0.235358	0.587366	MBTD1
ENSG00000011260	1074.33	0.169511	0.13336	1.27107	0.203702	0.547061	UTP18
ENSG00000011275	2517.14	-0.0325467	0.0829656	-0.392292	0.694843	0.911527	RNF216
ENSG00000011295	2001.39	-0.419126	0.0989431	-4.23604	2.27501e-05	0.00047976	TTC19
ENSG00000011304	10986.2	0.12277	0.0944091	1.30041	0.193461	0.531097	PTBP1
ENSG00000011332	40.3208	0.31302	0.485011	0.645387	0.518676	0.826028	DPF1
ENSG00000011347	3.97653	-2.16851	1.84287	-1.1767	0.239316	NA	SYT7
ENSG00000011376	142.296	-0.405111	0.339269	-1.19407	0.232451	0.583866	LARS2
ENSG00000011405	15470.3	-0.14906	0.170885	-0.872285	0.383053	0.733189	PIK3C2A
ENSG00000011422	1144.69	-0.279817	0.177804	-1.57374	0.115549	0.398338	PLAUR
ENSG00000011426	2988.21	1.51036	0.207099	7.29296	3.03222e-13	3.06844e-11	ANLN
ENSG00000011451	2392.5	0.0147452	0.099889	0.147615	0.882646	0.973416	WIZ
ENSG00000011454	3200.33	-0.33309	0.136863	-2.43375	0.0149435	0.097912	RABGAP1
ENSG00000011465	41.3367	0.892089	0.761126	1.17207	0.241171	0.592959	DCN
ENSG00000011478	369.535	-0.18367	0.186202	-0.9864	0.323937	0.680567	QPCTL
ENSG00000011485	2944.11	-0.00860282	0.121442	-0.0708387	0.943526	0.988786	PPP5C
ENSG00000011523	2237.72	0.100739	0.160214	0.628779	0.529494	0.83019	CEP68
ENSG00000011566	1762.93	0.306503	0.124663	2.45866	0.0139458	0.0930487	MAP4K3
ENSG00000011638	549.456	0.513869	0.155757	3.29917	0.000969707	0.0117657	LDAF1
ENSG00000012048	593.723	0.315799	0.225223	1.40216	0.160868	0.481037	BRCA1
ENSG00000012061	1760.22	0.199998	0.126585	1.57995	0.114118	0.395401	ERCC1
ENSG00000012124	20.5293	-0.636561	0.631597	-1.00786	0.313522	0.672848	CD22
ENSG00000012171	34.7393	-0.518759	0.541737	-0.957583	0.338273	0.695347	SEMA3B
ENSG00000012174	1282.43	-0.174448	0.12514	-1.39402	0.16331	0.485467	MBTPS2
ENSG00000012211	222.232	0.0453311	0.237786	0.190638	0.848809	0.963886	PRICKLE3
ENSG00000012223	2.72006	-2.52889	2.18966	-1.15492	0.248122	NA	LTF
ENSG00000012232	4056.79	0.0332175	0.144774	0.229445	0.818523	0.954049	EXTL3
ENSG00000012660	7058.47	-0.0927597	0.0753378	-1.23125	0.218229	0.567053	ELOVL5
ENSG00000012779	1.67614	2.89058	3.96355	0.729291	0.465824	NA	ALOX5
ENSG00000012817	906.607	-0.033659	0.177272	-0.189872	0.84941	0.963889	KDM5D
ENSG00000012822	2704.28	-0.352997	0.154648	-2.28258	0.022455	0.133532	CALCOCO1
ENSG00000012963	1586.96	0.0851297	0.0966574	0.880737	0.37846	0.731079	UBR7
ENSG00000012983	3680.61	0.0693172	0.113495	0.610749	0.541366	0.837252	MAP4K5
ENSG00000013016	209.635	0.663297	0.260881	2.54253	0.0110053	0.0782337	EHD3
ENSG00000013275	2305.05	-0.0941454	0.102778	-0.91601	0.359662	0.71203	PSMC4
ENSG00000013288	2708.59	0.0461537	0.097656	0.472615	0.636488	0.887381	MAN2B2
ENSG00000013293	140.202	0.222852	0.400732	0.556111	0.578135	0.856225	SLC7A14
ENSG00000013297	1909.77	0.871578	0.250557	3.47856	0.000504121	0.00689441	CLDN11
ENSG00000013306	1657.12	-0.0490649	0.129093	-0.380073	0.703891	0.915489	SLC25A39
ENSG00000013364	6743.84	-0.445744	0.108491	-4.10859	3.98085e-05	0.000786029	MVP
ENSG00000013374	2121.78	-0.0754435	0.108027	-0.698378	0.484941	0.804093	NUB1
ENSG00000013375	2885.3	0.151418	0.177169	0.854653	0.392743	0.739984	PGM3
ENSG00000013392	464.325	0.370619	0.173541	2.13563	0.0327097	0.17556	RWDD2A
ENSG00000013441	2407.99	-0.458951	0.116862	-3.9273	8.59048e-05	0.00152103	CLK1
ENSG00000013503	780.852	0.0345336	0.134581	0.256601	0.797487	0.946644	POLR3B
ENSG00000013523	1427.31	-0.745026	0.17146	-4.34518	1.39163e-05	0.000312463	ANGEL1
ENSG00000013561	1723.39	-0.0709053	0.118878	-0.596454	0.550872	0.842278	RNF14
ENSG00000013563	1743.28	-0.921553	0.105053	-8.77223	1.75156e-18	4.11674e-16	DNASE1L1
ENSG00000013573	740.549	0.485157	0.174328	2.78301	0.00538574	0.0452862	DDX11
ENSG00000013583	2060.71	-0.048322	0.13282	-0.363817	0.715995	0.919759	HEBP1
ENSG00000013588	1897.01	-0.963236	0.551327	-1.74712	0.0806162	0.320218	GPRC5A
ENSG00000013619	341.246	-0.549822	0.224025	-2.45429	0.0141163	0.0938425	MAMLD1
ENSG00000013725	2.00996	-4.35051	2.34856	-1.85241	0.0639664	NA	CD6
ENSG00000013810	1078.63	1.24451	0.201731	6.16915	6.86577e-10	4.14939e-08	TACC3
ENSG00000014123	1818.35	0.0686504	0.115368	0.595055	0.551807	0.842827	UFL1
ENSG00000014138	401.176	0.547186	0.293615	1.86361	0.062376	0.27022	POLA2
ENSG00000014164	553.72	-0.0630043	0.131222	-0.480136	0.631131	0.883864	ZC3H3
ENSG00000014216	5847.9	-0.063969	0.0926508	-0.690431	0.489923	0.806411	CAPN1
ENSG00000014257	0.593602	2.77694	3.98646	0.696593	0.486057	NA	ACP3
ENSG00000014641	2081.5	0.015889	0.101385	0.15672	0.875465	0.971347	MDH1
ENSG00000014824	2686.72	0.11753	0.0843705	1.39302	0.163614	0.485996	SLC30A9
ENSG00000014914	497.471	-1.18518	0.159582	-7.42679	1.11262e-13	1.25683e-11	MTMR11
ENSG00000014919	1290.24	0.0758781	0.0989167	0.76709	0.443028	0.776871	COX15
ENSG00000015133	2291.55	-0.549031	0.131682	-4.16938	3.05425e-05	0.000619868	CCDC88C
ENSG00000015153	535.35	0.0221244	0.221603	0.0998382	0.920473	0.985101	YAF2
ENSG00000015171	3884.06	0.0686052	0.0921584	0.744427	0.456618	0.785372	ZMYND11
ENSG00000015285	4.20422	1.43353	1.54391	0.928504	0.353146	NA	WAS
ENSG00000015413	17.3033	0.820139	0.828188	0.99028	0.322037	0.679106	DPEP1
ENSG00000015475	794.178	-0.276566	0.173114	-1.5976	0.110133	0.387178	BID
ENSG00000015479	9298.03	0.0954291	0.0775592	1.2304	0.218546	0.567231	MATR3
ENSG00000015532	818.341	-0.376379	0.146111	-2.57598	0.00999557	0.0728144	XYLT2
ENSG00000015568	135.54	-0.0203809	0.46494	-0.0438356	0.965035	0.993638	RGPD5
ENSG00000015676	2986.67	0.286139	0.113836	2.51362	0.01195	0.0831198	NUDCD3
ENSG00000016391	45.5629	0.252153	0.418583	0.602398	0.546909	0.840237	CHDH
ENSG00000016864	1887.45	-0.129349	0.116052	-1.11458	0.265031	0.620652	GLT8D1
ENSG00000017260	5134.56	-0.0529312	0.106696	-0.496095	0.619827	0.879928	ATP2C1
ENSG00000017427	60.0167	0.621953	0.631713	0.98455	0.324845	0.681503	IGF1
ENSG00000017483	310.883	0.512899	0.336428	1.52454	0.127373	0.422124	SLC38A5
ENSG00000017797	4338.36	0.0351701	0.0767661	0.458147	0.646847	0.891045	RALBP1
ENSG00000018189	1203.53	0.0880355	0.155972	0.56443	0.572462	0.853165	RUFY3
ENSG00000018236	9.25636	-0.295428	1.32003	-0.223804	0.82291	NA	CNTN1
ENSG00000018280	35.0543	-0.0440579	0.559336	-0.0787681	0.937217	0.987857	SLC11A1
ENSG00000018408	18246.4	0.287177	0.109251	2.6286	0.00857371	0.0645998	WWTR1
ENSG00000018510	4670.87	0.275476	0.111198	2.47735	0.0132362	0.0899195	AGPS
ENSG00000018610	566.903	-0.129727	0.161831	-0.801618	0.422774	0.765166	STEEP1
ENSG00000018625	6.15914	-0.45449	1.06005	-0.428742	0.668111	NA	ATP1A2
ENSG00000018699	1040.74	-0.348647	0.106189	-3.28328	0.00102607	0.0122811	TTC27
ENSG00000018869	77.0148	-0.0641978	0.3453	-0.185919	0.852508	0.964649	ZNF582
ENSG00000019102	27.8834	-0.125907	0.535528	-0.235108	0.814125	0.953127	VSIG2
ENSG00000019144	4362.5	-0.142185	0.119196	-1.19286	0.232922	0.584593	PHLDB1
ENSG00000019485	414.318	0.33205	0.185172	1.7932	0.072941	0.300027	PRDM11
ENSG00000019505	2.02758	-1.67162	3.38764	-0.493447	0.621697	NA	SYT13
ENSG00000019549	6.27848	0.729917	1.32386	0.551356	0.58139	NA	SNAI2
ENSG00000019582	45.9523	0.414293	0.495286	0.836472	0.402889	0.749355	CD74
ENSG00000019991	114.832	-0.537318	0.598944	-0.897109	0.369661	0.723629	HGF
ENSG00000019995	2061.37	0.000594009	0.108717	0.00546381	0.995641	1	ZRANB1
ENSG00000020129	575.303	-0.160634	0.151045	-1.06349	0.28756	0.646169	NCDN
ENSG00000020181	1780.47	0.0228616	0.139127	0.164322	0.869478	0.968347	ADGRA2
ENSG00000020256	528.918	-0.0207044	0.151213	-0.136922	0.891092	0.975664	ZFP64
ENSG00000020426	798.43	0.119514	0.136295	0.876879	0.380553	0.732367	MNAT1
ENSG00000020577	3567.22	0.428698	0.130132	3.29435	0.000986513	0.0119002	SAMD4A
ENSG00000020922	1033.08	0.138597	0.13516	1.02543	0.305161	0.664197	MRE11
ENSG00000021300	24.4365	-0.811201	0.83139	-0.975717	0.329205	0.686772	PLEKHB1
ENSG00000021355	2226.93	-0.423396	0.270516	-1.56514	0.11755	0.402587	SERPINB1
ENSG00000021461	5.01648	0.198808	1.2271	0.162015	0.871294	NA	CYP3A43
ENSG00000021488	2.11394	0.669197	1.99318	0.335744	0.737064	NA	SLC7A9
ENSG00000021574	375.43	0.177469	0.409095	0.433808	0.664428	0.900065	SPAST
ENSG00000021645	85.6898	0.955982	0.401619	2.38032	0.0172977	0.109307	NRXN3
ENSG00000021762	661.923	-0.403401	0.13621	-2.96162	0.00306027	0.0297295	OSBPL5
ENSG00000021776	2873.08	0.35186	0.102105	3.44606	0.000568822	0.00764656	AQR
ENSG00000021826	117.737	0.210893	0.392247	0.537653	0.590817	0.863789	CPS1
ENSG00000022267	648.017	0.606356	0.393908	1.53934	0.123722	0.414838	FHL1
ENSG00000022277	2623.13	0.156798	0.0901307	1.73968	0.0819159	0.323052	RTF2
ENSG00000022556	15.3507	0.189575	3.75876	0.0504355	0.959775	0.992217	NLRP2
ENSG00000022567	244.296	-0.0521198	0.293826	-0.177383	0.859207	0.966464	SLC45A4
ENSG00000022840	5584.06	0.042356	0.0825972	0.512802	0.60809	0.873854	RNF10
ENSG00000022976	420.656	-0.0296479	0.148017	-0.200301	0.841245	0.96072	ZNF839
ENSG00000023041	1620.79	0.0322912	0.128449	0.251393	0.801511	0.948045	ZDHHC6
ENSG00000023171	141.157	0.259471	0.353003	0.735039	0.462316	0.789262	GRAMD1B
ENSG00000023191	400.792	-0.944358	0.321145	-2.9406	0.00327578	0.0311992	RNH1
ENSG00000023228	4102.13	0.0338299	0.0922596	0.366682	0.713856	0.919118	NDUFS1
ENSG00000023287	3729.56	-0.142246	0.118784	-1.19752	0.231103	0.581993	RB1CC1
ENSG00000023318	3123.31	-0.0982814	0.0974656	-1.00837	0.313277	0.672707	ERP44
ENSG00000023330	2083.04	-0.304254	0.113566	-2.67909	0.0073823	0.0574919	ALAS1
ENSG00000023445	425.664	-0.629621	0.443405	-1.41997	0.155617	0.471642	BIRC3
ENSG00000023516	3335.8	0.100038	0.16294	0.613956	0.539244	0.836277	AKAP11
ENSG00000023572	240.209	-0.0955189	0.198122	-0.482122	0.629719	0.883753	GLRX2
ENSG00000023608	489.522	0.178837	0.201828	0.886087	0.375571	0.728252	SNAPC1
ENSG00000023697	1315.63	0.330086	0.102464	3.22148	0.00127531	0.0145187	DERA
ENSG00000023734	5727.04	0.0291797	0.100219	0.291159	0.77093	0.941102	STRAP
ENSG00000023839	2.36676	-0.0516647	2.1248	-0.0243151	0.980601	NA	ABCC2
ENSG00000023892	6.84731	2.49781	1.19716	2.08644	0.0369386	NA	DEF6
ENSG00000023902	1684.94	0.178062	0.163147	1.09143	0.275086	0.633162	PLEKHO1
ENSG00000023909	6480.19	-0.711621	0.103179	-6.89693	5.31367e-12	4.47577e-10	GCLM
ENSG00000024048	2557.89	-0.0859647	0.0978893	-0.878182	0.379845	0.73205	UBR2
ENSG00000024422	14247	-0.329059	0.124301	-2.64727	0.00811442	0.0619721	EHD2
ENSG00000024526	605.701	2.77509	0.372359	7.45273	9.14278e-14	1.04085e-11	DEPDC1
ENSG00000024862	372.889	-0.327338	0.185275	-1.76676	0.0772677	0.311896	CCDC28A
ENSG00000025039	18.9363	0.854043	0.759688	1.1242	0.260927	0.616045	RRAGD
ENSG00000025156	448.203	-0.290489	0.183623	-1.58199	0.113653	0.394415	HSF2
ENSG00000025293	2627.85	-0.160544	0.115648	-1.38821	0.165073	0.488117	PHF20
ENSG00000025423	1.31857	2.37441	2.98752	0.794775	0.426744	NA	HSD17B6
ENSG00000025434	117.055	0.989575	0.291329	3.39676	0.000681888	0.00884816	NR1H3
ENSG00000025708	29.0873	-0.86618	0.626843	-1.38181	0.167029	0.490122	TYMP
ENSG00000025770	519.775	0.0927312	0.233478	0.397172	0.69124	0.910408	NCAPH2
ENSG00000025772	1305.57	0.221104	0.157993	1.39945	0.161678	0.48288	TOMM34
ENSG00000025796	5438.98	0.127752	0.118227	1.08056	0.279892	0.637344	SEC63
ENSG00000025800	5435.21	-0.022048	0.0725797	-0.303776	0.761299	0.937755	KPNA6
ENSG00000026025	223482	0.119185	0.109361	1.08984	0.275785	0.633772	VIM
ENSG00000026036	485.585	0.268047	0.212016	1.26428	0.206131	0.550841	RTEL1-TNFRSF6B
ENSG00000026103	196.902	0.477048	0.223158	2.13771	0.0325402	0.174844	FAS
ENSG00000026297	88.6198	0.35919	0.306411	1.17225	0.241097	0.592959	RNASET2
ENSG00000026508	5133.25	0.0152032	0.0763653	0.199085	0.842196	0.960965	CD44
ENSG00000026559	31.5504	-0.666524	0.582185	-1.14487	0.252264	0.607602	KCNG1
ENSG00000026652	599.693	-0.345597	0.17557	-1.96842	0.0490194	0.230013	AGPAT4
ENSG00000026751	4.66485	0.333122	1.1996	0.277695	0.781247	NA	SLAMF7
ENSG00000026950	337.193	-0.0931071	0.244028	-0.381542	0.702801	0.915437	BTN3A1
ENSG00000027001	524.75	-0.0273502	0.165986	-0.164774	0.869122	0.968341	MIPEP
ENSG00000027075	7057.31	-0.148514	0.0916488	-1.62047	0.105131	0.377254	PRKCH
ENSG00000027697	1385.48	-0.429024	0.193582	-2.21624	0.0266752	0.151603	IFNGR1
ENSG00000027847	552.562	0.0207554	0.145551	0.142598	0.886607	0.974479	B4GALT7
ENSG00000027869	7.99042	1.7445	1.23951	1.4074	0.159308	NA	SH2D2A
ENSG00000028116	1213.63	-0.220345	0.12125	-1.81729	0.0691733	0.289404	VRK2
ENSG00000028137	2161.08	0.210782	0.116278	1.81274	0.0698716	0.291238	TNFRSF1B
ENSG00000028203	3570.19	-0.107736	0.110734	-0.972932	0.330587	0.687535	VEZT
ENSG00000028277	452.731	1.45434	0.453773	3.205	0.00135063	0.0152043	POU2F2
ENSG00000028310	1403.19	0.000300196	0.110858	0.00270793	0.997839	1	BRD9
ENSG00000028528	3540.73	0.0188536	0.103745	0.18173	0.855795	0.965411	SNX1
ENSG00000028839	617.421	-0.10129	0.133014	-0.761504	0.446356	0.778664	TBPL1
ENSG00000029153	2116.97	0.0298412	0.0988997	0.301732	0.762857	0.938786	BMAL2
ENSG00000029363	7645.22	0.0896203	0.1026	0.873489	0.382397	0.733179	BCLAF1
ENSG00000029364	3228.21	-0.0343415	0.105726	-0.324816	0.745321	0.931806	SLC39A9
ENSG00000029534	70.1207	-1.40053	0.521361	-2.68629	0.00722508	0.0566042	ANK1
ENSG00000029639	267.052	0.335588	0.201983	1.66147	0.0966198	0.358346	TFB1M
ENSG00000029725	3478.69	0.0760378	0.12402	0.613109	0.539804	0.836277	RABEP1
ENSG00000029993	1364.82	0.487052	0.193952	2.51119	0.0120324	0.0835237	HMGB3
ENSG00000030066	1925	-0.251532	0.147454	-1.70584	0.088038	0.337425	NUP160
ENSG00000030110	771.971	-0.0980638	0.144232	-0.679901	0.496567	0.811936	BAK1
ENSG00000030304	1.1792	-0.448	2.86688	-0.156268	0.875822	NA	MUSK
ENSG00000030419	32.6414	0.291154	0.549183	0.530158	0.596003	0.86607	IKZF2
ENSG00000030582	11149.3	-0.193425	0.105394	-1.83526	0.0664674	0.282297	GRN
ENSG00000031003	1605.61	0.26867	0.171706	1.56471	0.117652	0.402636	FAM13B
ENSG00000031081	8521.54	-0.335617	0.115958	-2.8943	0.00380003	0.0346955	ARHGAP31
ENSG00000031691	186.42	-0.0327292	0.251973	-0.129892	0.896652	0.976679	CENPQ
ENSG00000031698	4750.55	-0.0102707	0.0866626	-0.118513	0.905661	0.979827	SARS1
ENSG00000031823	1455.87	0.190832	0.114977	1.65974	0.0969672	0.359087	RANBP3
ENSG00000032219	1458.18	0.113792	0.110592	1.02894	0.303509	0.662984	ARID4A
ENSG00000032389	639.223	-0.0766728	0.127875	-0.59959	0.548779	0.841377	EIPR1
ENSG00000032444	3322.29	-0.205696	0.10633	-1.93451	0.0530507	0.242413	PNPLA6
ENSG00000032742	407.665	0.2625	0.174292	1.5061	0.132042	0.430853	IFT88
ENSG00000033011	741.364	-0.0776633	0.134865	-0.575858	0.564711	0.848836	ALG1
ENSG00000033030	846.528	-0.0317573	0.122556	-0.259125	0.795539	0.94572	ZCCHC8
ENSG00000033050	2930.44	0.00105139	0.102393	0.0102682	0.991807	0.998664	ABCF2
ENSG00000033100	4100.39	-0.264942	0.0944348	-2.80556	0.00502299	0.0429924	CHPF2
ENSG00000033122	3.32752	0	3.00962	0	1	NA	LRRC7
ENSG00000033170	1223.4	-0.480746	0.189593	-2.53567	0.0112233	0.0792771	FUT8
ENSG00000033178	3817.27	0.0648324	0.194461	0.333395	0.738836	0.92939	UBA6
ENSG00000033327	2391.1	0.383456	0.122774	3.12327	0.00178851	0.0191916	GAB2
ENSG00000033627	1490.76	-0.649125	0.151948	-4.27203	1.93698e-05	0.000416922	ATP6V0A1
ENSG00000033800	1651.29	-0.107276	0.107699	-0.99607	0.319216	0.678129	PIAS1
ENSG00000033867	2566.57	0.552829	0.152609	3.62252	0.000291746	0.00429861	SLC4A7
ENSG00000034053	155.064	0.362676	0.302291	1.19976	0.230233	0.581027	APBA2
ENSG00000034152	1082.25	0.415895	0.186848	2.22584	0.0260248	0.148866	MAP2K3
ENSG00000034510	27583.2	-0.26003	0.0925046	-2.81099	0.0049389	0.0424599	TMSB10
ENSG00000034533	224.89	0.123724	0.199679	0.619615	0.535511	0.83415	ASTE1
ENSG00000034677	2931.3	0.341964	0.116432	2.93703	0.00331376	0.0314786	RNF19A
ENSG00000034693	560.106	-0.0116792	0.194701	-0.0599855	0.952167	0.990738	PEX3
ENSG00000034713	2028.59	-0.088178	0.101449	-0.869185	0.384746	0.734607	GABARAPL2
ENSG00000035115	618.878	-0.0111626	0.15652	-0.0713172	0.943145	0.9886	SH3YL1
ENSG00000035141	1273.28	0.322105	0.116879	2.75587	0.00585356	0.0482728	FAM136A
ENSG00000035403	14229.9	0.0387344	0.112212	0.34519	0.729952	0.927086	VCL
ENSG00000035499	189.912	2.52546	0.580832	4.348	1.37385e-05	0.0003091	DEPDC1B
ENSG00000035664	140.953	0.253225	0.337939	0.749321	0.453664	0.783666	DAPK2
ENSG00000035681	2050.1	0.112363	0.111919	1.00396	0.315396	0.674191	NSMAF
ENSG00000035687	4339.39	0.513337	0.126362	4.06242	4.85665e-05	0.000932425	ADSS2
ENSG00000035862	17951	0.120886	0.0719869	1.67928	0.0930978	0.349703	TIMP2
ENSG00000035928	3158.9	0.330621	0.104268	3.17088	0.00151979	0.0166514	RFC1
ENSG00000036054	1729.19	-0.120842	0.113984	-1.06016	0.28907	0.647086	TBC1D23
ENSG00000036257	3712.79	-0.0036273	0.0816057	-0.0444491	0.964546	0.993383	CUL3
ENSG00000036448	0.74053	2.26465	3.99025	0.567546	0.570343	NA	MYOM2
ENSG00000036473	1.69797	0.4688	2.58452	0.181388	0.856063	NA	OTC
ENSG00000036530	37.5943	-0.30743	0.46803	-0.65686	0.511271	0.821325	CYP46A1
ENSG00000036549	2091.86	0.10717	0.114067	0.939533	0.347457	0.703899	ZZZ3
ENSG00000036565	6.92707	-1.12222	1.01651	-1.10399	0.269597	NA	SLC18A1
ENSG00000036672	9.43826	-0.287042	0.915717	-0.313461	0.753931	NA	USP2
ENSG00000037042	330.756	-0.133576	0.200486	-0.666261	0.505244	0.815871	TUBG2
ENSG00000037241	599.877	-0.00722139	0.160754	-0.0449221	0.964169	0.993239	RPL26L1
ENSG00000037280	291.14	0.561028	0.228987	2.45004	0.0142841	0.0947848	FLT4
ENSG00000037474	3198.4	0.0266809	0.0998175	0.267296	0.789241	0.944063	NSUN2
ENSG00000037637	1463.81	0.153827	0.121041	1.27087	0.203774	0.547152	FBXO42
ENSG00000037749	1629.87	0.108672	0.176759	0.614799	0.538687	0.835948	MFAP3
ENSG00000037757	1035.92	0.0730757	0.128616	0.568168	0.569921	0.851958	MRI1
ENSG00000037897	225.828	0.309812	0.269797	1.14831	0.250839	0.605494	METTL1
ENSG00000038002	515.424	-0.00503066	0.135634	-0.03709	0.970413	0.994935	AGA
ENSG00000038210	1327.51	-0.00302864	0.13813	-0.021926	0.982507	0.996886	PI4K2B
ENSG00000038219	4407.01	0.0358343	0.0938252	0.381926	0.702516	0.915331	BOD1L1
ENSG00000038274	3369.62	0.162674	0.0837849	1.94156	0.05219	0.240061	MAT2B
ENSG00000038295	180.916	-0.405361	0.396788	-1.02161	0.306968	0.665934	TLL1
ENSG00000038358	1657.74	0.455575	0.138278	3.29463	0.000985513	0.0119002	EDC4
ENSG00000038382	8848.6	-0.0389926	0.0842149	-0.463014	0.643355	0.88958	TRIO
ENSG00000038427	247.192	-1.10328	0.413887	-2.66566	0.00768368	0.0593043	VCAN
ENSG00000038532	1343.41	0.0277576	0.114417	0.242601	0.808314	0.950804	CLEC16A
ENSG00000038945	82.9599	1.60225	0.608677	2.63235	0.00847976	0.0641241	MSR1
ENSG00000039068	7.5814	0.350903	1.03478	0.339109	0.734528	NA	CDH1
ENSG00000039123	2661.7	-0.0638719	0.135639	-0.470895	0.637715	0.887987	MTREX
ENSG00000039139	17.0989	-0.0273933	0.805274	-0.0340174	0.972863	0.995475	DNAH5
ENSG00000039319	2596.99	-0.203463	0.191715	-1.06128	0.288563	0.646987	ZFYVE16
ENSG00000039523	6075.15	-0.418896	0.0776404	-5.39533	6.83973e-08	2.7609e-06	RIPOR1
ENSG00000039560	13522.2	0.219972	0.152476	1.44266	0.149115	0.46085	RAI14
ENSG00000039600	0.924984	0.778985	3.83798	0.202967	0.839161	NA	SOX30
ENSG00000039650	820.827	0.0445553	0.117945	0.377763	0.705607	0.91565	PNKP
ENSG00000040199	677.269	0.0684547	0.123761	0.553122	0.58018	0.857529	PHLPP2
ENSG00000040275	862.592	0.602105	0.136409	4.41396	1.01498e-05	0.000237024	SPDL1
ENSG00000040341	2425.25	0.0292639	0.125315	0.233524	0.815355	0.95332	STAU2
ENSG00000040487	327.294	0.0340248	0.176336	0.192954	0.846995	0.963197	SLC66A1
ENSG00000040531	987.573	-0.0915542	0.134792	-0.679226	0.496995	0.812316	CTNS
ENSG00000040608	5.54869	-1.32299	1.22941	-1.07612	0.281875	NA	RTN4R
ENSG00000040633	1525.4	0.14984	0.120178	1.24682	0.212462	0.559349	PHF23
ENSG00000040731	1.34037	0.683118	2.9956	0.22804	0.819615	NA	CDH10
ENSG00000040933	1381.24	-0.00570613	0.132514	-0.0430607	0.965653	0.993652	INPP4A
ENSG00000041353	31.6202	-1.69564	0.695695	-2.43733	0.0147961	0.097165	RAB27B
ENSG00000041357	4082.15	0.00613307	0.0920324	0.0666404	0.946868	0.989718	PSMA4
ENSG00000041515	1.13127	-2.11832	3.85388	-0.549658	0.582554	NA	MYO16
ENSG00000041802	2620.74	0.338102	0.135956	2.48685	0.012888	0.0881297	LSG1
ENSG00000041880	305.233	0.300453	0.217889	1.37893	0.167917	0.491441	PARP3
ENSG00000041982	4.34435	-0.0560511	2.33364	-0.0240188	0.980838	NA	TNC
ENSG00000041988	191.807	-0.252224	0.240967	-1.04672	0.29523	0.65441	THAP3
ENSG00000042062	30.4505	-0.615236	0.596121	-1.03207	0.302041	0.661956	RIPOR3
ENSG00000042088	683.17	0.453531	0.153732	2.95014	0.00317629	0.0304305	TDP1
ENSG00000042286	516.314	-0.287771	0.153414	-1.87578	0.0606855	0.264842	AIFM2
ENSG00000042304	4.73893	-1.11836	1.25634	-0.890173	0.373373	NA	SLC19A4P
ENSG00000042317	427.974	0.222145	0.160856	1.38102	0.167273	0.490444	SPATA7
ENSG00000042429	131.656	1.00515	0.628931	1.59819	0.110001	0.386996	MED17
ENSG00000042445	1944.25	0.0677496	0.104626	0.647542	0.517281	0.825296	RETSAT
ENSG00000042493	598.812	-0.0560247	0.205295	-0.272899	0.784931	0.943894	CAPG
ENSG00000042753	2929.18	0.0888416	0.0989233	0.898086	0.36914	0.723144	AP2S1
ENSG00000042832	45.6392	-1.40204	0.76686	-1.82829	0.0675067	0.284555	TG
ENSG00000042980	4.95368	1.79258	1.79621	0.99798	0.318289	NA	ADAM28
ENSG00000043039	5.19095	-0.394259	1.2164	-0.324119	0.745848	NA	BARX2
ENSG00000043093	1345.05	0.0857442	0.158172	0.542094	0.587754	0.862248	DCUN1D1
ENSG00000043143	1334.87	0.0905894	0.125734	0.720487	0.471225	0.795607	JADE2
ENSG00000043355	1.62932	0.131908	3.97102	0.0332178	0.973501	NA	ZIC2
ENSG00000043462	5.19255	1.98661	1.87452	1.05979	0.289238	NA	LCP2
ENSG00000043514	463.886	-0.0283761	0.176417	-0.160846	0.872214	0.96943	TRIT1
ENSG00000043591	2.61945	-0.954391	2.543	-0.375301	0.707437	NA	ADRB1
ENSG00000044090	1380.67	0.294108	0.109692	2.68121	0.00733558	0.0572545	CUL7
ENSG00000044115	24253.7	-0.32518	0.0861671	-3.77383	0.000160761	0.0025828	CTNNA1
ENSG00000044446	621.085	0.218332	0.178507	1.2231	0.22129	0.57134	PHKA2
ENSG00000044459	701.54	-0.183982	0.151246	-1.21644	0.223815	0.5748	CNTLN
ENSG00000044574	42309.2	-0.00883505	0.358173	-0.024667	0.980321	0.996784	HSPA5
ENSG00000046604	45.6889	-0.117546	0.450269	-0.261058	0.794047	0.945457	DSG2
ENSG00000046647	283.726	0.386108	0.188441	2.04896	0.0404656	0.202097	GEMIN8
ENSG00000046651	554.516	-0.00588016	0.154176	-0.0381393	0.969577	0.994877	OFD1
ENSG00000046653	16.4502	1.54375	0.905958	1.704	0.0883819	0.338209	GPM6B
ENSG00000046889	6874.19	0.231486	0.19267	1.20146	0.229572	0.580446	PREX2
ENSG00000047056	1783.51	0.0235442	0.108141	0.217717	0.827649	0.956217	WDR37
ENSG00000047188	3116.44	-0.00554754	0.104841	-0.0529136	0.957801	0.992217	YTHDC2
ENSG00000047230	725.803	0.315809	0.15306	2.0633	0.039084	0.197275	CTPS2
ENSG00000047249	1575.48	-0.0890788	0.106851	-0.833675	0.404464	0.75005	ATP6V1H
ENSG00000047315	5638.9	0.0227414	0.0982526	0.231459	0.816958	0.953843	POLR2B
ENSG00000047346	2720.9	0.408933	0.144025	2.83932	0.00452102	0.039544	ATOSA
ENSG00000047365	7.8578	0.114168	1.16221	0.0982337	0.921747	NA	ARAP2
ENSG00000047410	8494.93	0.126679	0.0911928	1.38914	0.164791	0.487581	TPR
ENSG00000047457	2.61345	1.68516	2.76658	0.609115	0.542448	NA	CP
ENSG00000047578	1087.65	0.0951102	0.117103	0.812196	0.416679	0.759456	KATNIP
ENSG00000047579	534.314	0.197385	0.141203	1.39788	0.162148	0.483886	DTNBP1
ENSG00000047597	5.80478	-0.764365	1.12787	-0.677709	0.497956	NA	XK
ENSG00000047617	325.852	-0.0998865	0.200207	-0.498916	0.617839	0.879928	ANO2
ENSG00000047621	801.661	-0.217206	0.150977	-1.43866	0.150246	0.462178	FERRY3
ENSG00000047634	645.189	-0.0162237	0.160393	-0.10115	0.919432	0.984989	SCML1
ENSG00000047644	4380.04	0.176853	0.107023	1.65247	0.0984387	0.362835	WWC3
ENSG00000047648	94.0176	-0.84989	0.442925	-1.91882	0.0550077	0.248627	ARHGAP6
ENSG00000047662	0.862097	-3.50163	3.91886	-0.893534	0.371571	NA	FAM184B
ENSG00000047849	19184	-0.0438524	0.0788191	-0.556368	0.577959	0.856215	MAP4
ENSG00000047932	2039.19	0.121364	0.100825	1.20372	0.2287	0.58019	GOPC
ENSG00000048028	945.13	0.365621	0.146264	2.49973	0.0124287	0.0853902	USP28
ENSG00000048052	1040.2	-0.164704	0.174175	-0.945619	0.344343	0.700188	HDAC9
ENSG00000048140	1956.52	0.123399	0.0857155	1.43964	0.14997	0.461988	TSPAN17
ENSG00000048162	586.383	0.28265	0.169912	1.6635	0.0962119	0.356925	NOP16
ENSG00000048342	703.039	0.230808	0.193654	1.19186	0.233317	0.58528	CC2D2A
ENSG00000048392	4441.79	0.0716986	0.0936491	0.765609	0.443909	0.777535	RRM2B
ENSG00000048405	1322.81	-0.0574598	0.107816	-0.532943	0.594073	0.865164	ZNF800
ENSG00000048471	1257.4	-0.328318	0.10593	-3.09938	0.00193929	0.0204926	SNX29
ENSG00000048540	0.764304	2.61486	4.00264	0.653284	0.513573	NA	LMO3
ENSG00000048544	1802.38	0.0281275	0.113219	0.248435	0.803798	0.948645	MRPS10
ENSG00000048649	3819.91	0.085335	0.102734	0.830641	0.406177	0.75169	RSF1
ENSG00000048707	4089.14	0.185689	0.104531	1.77641	0.0756652	0.307129	VPS13D
ENSG00000048740	1972.57	0.173893	0.116633	1.49094	0.135977	0.438569	CELF2
ENSG00000048828	8305.2	-0.0226896	0.0770761	-0.294379	0.768468	0.940987	FAM120A
ENSG00000048991	1921.79	-0.0219613	0.112412	-0.195364	0.845108	0.962027	R3HDM1
ENSG00000049089	6.60724	0.12497	1.35396	0.0922993	0.92646	NA	COL9A2
ENSG00000049130	336.58	1.53481	0.418211	3.66995	0.000242596	0.0036824	KITLG
ENSG00000049167	327.968	-0.255216	0.18974	-1.34508	0.178599	0.509004	ERCC8
ENSG00000049192	2696.01	-1.05314	0.12737	-8.26836	1.35809e-16	2.5372e-14	ADAMTS6
ENSG00000049239	3583.82	0.371918	0.0905019	4.1095	3.9651e-05	0.000783981	H6PD
ENSG00000049245	7854.82	0.0346874	0.0740735	0.468283	0.639582	0.888429	VAMP3
ENSG00000049246	253.266	-0.154649	0.233301	-0.662873	0.507412	0.817966	PER3
ENSG00000049249	81.1485	0.116297	0.628854	0.184935	0.85328	0.964709	TNFRSF9
ENSG00000049283	4.89662	-1.23159	1.88558	-0.653163	0.513651	NA	EPN3
ENSG00000049323	4555.03	0.0535951	0.171976	0.311642	0.755313	0.935723	LTBP1
ENSG00000049449	22240.9	-0.224877	0.107344	-2.09492	0.0361779	0.186878	RCN1
ENSG00000049540	68.3495	-2.68314	0.512458	-5.23582	1.64253e-07	6.07485e-06	ELN
ENSG00000049541	641.315	0.165681	0.17614	0.940619	0.3469	0.703449	RFC2
ENSG00000049618	2747.78	0.00141663	0.115288	0.0122878	0.990196	0.998354	ARID1B
ENSG00000049656	3666.91	-0.0280564	0.0789732	-0.355265	0.722391	0.922973	CLPTM1L
ENSG00000049759	1513.24	0.203375	0.14906	1.36439	0.172446	0.499281	NEDD4L
ENSG00000049768	2.09519	-0.222474	2.31807	-0.095974	0.923541	NA	FOXP3
ENSG00000049769	38.8619	-0.597009	0.504338	-1.18375	0.236513	0.588135	PPP1R3F
ENSG00000049860	5143.44	0.0542573	0.0999332	0.542936	0.587174	0.862031	HEXB
ENSG00000049883	462.034	0.0892117	0.188618	0.472975	0.636231	0.887277	PTCD2
ENSG00000050130	1803.54	-0.0783991	0.113894	-0.688351	0.491232	0.807332	JKAMP
ENSG00000050165	5770.06	0.571963	0.106666	5.36217	8.22299e-08	3.24031e-06	DKK3
ENSG00000050327	76.024	-0.159934	0.422098	-0.378903	0.70476	0.915583	ARHGEF5
ENSG00000050344	2640.14	0.468723	0.161067	2.91011	0.00361301	0.0334214	NFE2L3
ENSG00000050393	1121.86	0.087643	0.139331	0.62903	0.52933	0.830111	MCUR1
ENSG00000050405	7423.16	-0.111861	0.0939515	-1.19063	0.2338	0.585687	LIMA1
ENSG00000050426	901.244	0.0250955	0.130589	0.192172	0.847607	0.963421	LETMD1
ENSG00000050438	476.117	0.394935	0.207793	1.90062	0.0573521	0.255712	SLC4A8
ENSG00000050555	2.43756	0.26637	1.58174	0.168403	0.866267	NA	LAMC3
ENSG00000050628	2.39282	1.28609	2.73327	0.470531	0.637976	NA	PTGER3
ENSG00000050730	64.3645	-0.76077	0.629708	-1.20813	0.226996	0.578631	TNIP3
ENSG00000050748	1843.5	0.0991921	0.107076	0.926375	0.354251	0.708211	MAPK9
ENSG00000050767	2.65826	-5.07884	3.11986	-1.62791	0.103545	NA	COL23A1
ENSG00000050820	3604.01	0.168612	0.111398	1.5136	0.130128	0.427079	BCAR1
ENSG00000051009	684.766	-0.616395	0.154427	-3.99149	6.56599e-05	0.00119899	FHIP1B
ENSG00000051108	3344.81	-0.342192	0.15296	-2.23714	0.0252772	0.145704	HERPUD1
ENSG00000051128	2296.93	0.460016	0.149192	3.08339	0.00204656	0.021397	HOMER3
ENSG00000051180	240.059	0.731272	0.223416	3.27314	0.00106361	0.0125701	RAD51
ENSG00000051341	165.302	0.50265	0.456869	1.10021	0.271243	0.628886	POLQ
ENSG00000051382	1639.43	-0.0715398	0.106267	-0.673207	0.500816	0.81432	PIK3CB
ENSG00000051523	343.826	0.0993902	0.187105	0.5312	0.59528	0.865813	CYBA
ENSG00000051596	679.574	-0.0375689	0.157237	-0.238931	0.811159	0.952551	THOC3
ENSG00000051620	2032.6	-0.133552	0.1215	-1.09919	0.271684	0.629085	HEBP2
ENSG00000051825	943.64	0.250994	0.179172	1.40086	0.161257	0.48182	MPHOSPH9
ENSG00000052126	706.131	0.133584	0.183015	0.729908	0.465446	0.791847	PLEKHA5
ENSG00000052723	1319.24	0.339893	0.164964	2.06041	0.0393593	0.198114	SIKE1
ENSG00000052749	932.159	-0.10501	0.150164	-0.699303	0.484363	0.803796	RRP12
ENSG00000052795	1474.48	-0.727449	0.181433	-4.00946	6.08569e-05	0.00112254	FNIP2
ENSG00000052802	3480.36	-0.0624656	0.161034	-0.387904	0.698087	0.913317	MSMO1
ENSG00000052841	3137.23	-0.177648	0.0869069	-2.04412	0.0409413	0.203617	TTC17
ENSG00000053108	21.8154	-0.599597	0.587621	-1.02038	0.307548	0.666408	FSTL4
ENSG00000053254	3947.41	0.17516	0.114799	1.5258	0.127059	0.421946	FOXN3
ENSG00000053371	589.215	-0.0217401	0.178313	-0.121921	0.902961	0.978723	AKR7A2
ENSG00000053372	1221.98	0.199244	0.116301	1.71318	0.0866798	0.334684	MRTO4
ENSG00000053501	247.011	0.28207	0.184594	1.52806	0.126498	0.420564	USE1
ENSG00000053524	94.2964	0.145651	0.354938	0.410356	0.681545	0.905997	MCF2L2
ENSG00000053702	2.35173	-1.03067	1.79873	-0.572999	0.566646	NA	NRIP2
ENSG00000053747	320.44	0.853261	0.359156	2.37574	0.0175139	0.110291	LAMA3
ENSG00000053770	2142.61	0.268833	0.130427	2.06117	0.0392865	0.198022	AP5M1
ENSG00000053900	1023.94	0.0512181	0.120782	0.424054	0.671527	0.902916	ANAPC4
ENSG00000053918	0.752241	-0.42706	3.60379	-0.118503	0.905669	NA	KCNQ1
ENSG00000054116	1874.83	-0.0331513	0.0939941	-0.352696	0.724316	0.924025	TRAPPC3
ENSG00000054118	8357.61	0.106026	0.0695361	1.52476	0.127318	0.422124	THRAP3
ENSG00000054148	1079.74	0.0859716	0.154254	0.557337	0.577297	0.855786	PHPT1
ENSG00000054179	1.3038	-3.74214	3.94818	-0.947813	0.343225	NA	ENTPD2
ENSG00000054219	2924.2	1.00961	0.120257	8.39546	4.64078e-17	9.39242e-15	LY75
ENSG00000054267	2749.09	-0.0153032	0.130588	-0.117187	0.906712	0.980268	ARID4B
ENSG00000054277	646.897	0.204256	0.147619	1.38367	0.166459	0.489241	OPN3
ENSG00000054282	312.597	-0.382598	0.330377	-1.15806	0.246838	0.600501	SDCCAG8
ENSG00000054523	5481.18	-0.150536	0.0825227	-1.82417	0.0681263	0.286421	KIF1B
ENSG00000054611	1117.06	-0.0599663	0.122085	-0.491185	0.623295	0.880871	TBC1D22A
ENSG00000054654	3895.91	0.0338902	0.126552	0.267797	0.788856	0.944063	SYNE2
ENSG00000054690	66.5041	0.00691175	0.35265	0.0195995	0.984363	0.997347	PLEKHH1
ENSG00000054793	3039.65	0.223659	0.142605	1.56838	0.116793	0.401001	ATP9A
ENSG00000054938	0.666572	1.03195	4.01884	0.256777	0.797351	NA	CHRDL2
ENSG00000054965	1682.85	-0.111681	0.102922	-1.08511	0.277874	0.635714	FAM168A
ENSG00000054967	301.543	-0.0796367	0.273209	-0.291487	0.770679	0.941102	RELT
ENSG00000054983	1605.8	0.102298	0.163018	0.627528	0.530313	0.830581	GALC
ENSG00000055044	1787.64	0.297523	0.139719	2.12943	0.0332183	0.177091	NOP58
ENSG00000055070	5606.23	0.0649409	0.0962885	0.674441	0.500031	0.813765	SZRD1
ENSG00000055118	0.316204	0.112149	4.02155	0.0278869	0.977752	NA	KCNH2
ENSG00000055130	1331.99	-0.151454	0.158153	-0.957641	0.338244	0.695347	CUL1
ENSG00000055147	1114.76	0.243642	0.126604	1.92444	0.0542995	0.246342	FAM114A2
ENSG00000055163	734.844	0.0847308	0.132792	0.638072	0.523427	0.828005	CYFIP2
ENSG00000055208	3667.28	0.0357219	0.0771997	0.462721	0.643565	0.889587	TAB2
ENSG00000055211	2896.16	-0.0832009	0.0973635	-0.854539	0.392807	0.739984	GINM1
ENSG00000055332	4175.43	0.0392402	0.149407	0.262641	0.792828	0.945369	EIF2AK2
ENSG00000055483	1786.73	0.0983986	0.116499	0.844628	0.398318	0.745883	USP36
ENSG00000055609	4346.98	-0.0660247	0.133917	-0.493027	0.621993	0.880141	KMT2C
ENSG00000055732	1.38512	3.01094	3.98091	0.756345	0.449442	NA	MCOLN3
ENSG00000055813	928.506	0.554286	0.204486	2.71063	0.00671553	0.05368	CCDC85A
ENSG00000055917	4764.79	0.163017	0.102403	1.59191	0.111405	0.389553	PUM2
ENSG00000055950	937.169	-0.0164202	0.129343	-0.126951	0.89898	0.977385	MRPL43
ENSG00000055955	7.81454	0.835254	1.06876	0.781517	0.434499	NA	ITIH4
ENSG00000056050	613.604	0.116149	0.127838	0.908566	0.363579	0.717599	HPF1
ENSG00000056097	4657.23	-0.146448	0.103732	-1.41179	0.158011	0.47625	ZFR
ENSG00000056277	342.677	-0.36406	0.191841	-1.89772	0.057733	0.25649	ZNF280C
ENSG00000056291	62.1904	2.27087	0.622767	3.64642	0.000265921	0.00398253	NPFFR2
ENSG00000056558	229.967	0.450365	0.454558	0.990777	0.321794	0.679076	TRAF1
ENSG00000056586	5642.58	-0.0308264	0.10856	-0.283957	0.776444	0.942049	RC3H2
ENSG00000056972	629.912	0.182386	0.174106	1.04755	0.294844	0.653754	TRAF3IP2
ENSG00000056998	0.908734	-0.50165	3.92985	-0.127651	0.898425	NA	GYG2
ENSG00000057019	4588.93	0.268748	0.202994	1.32392	0.18553	0.519296	DCBLD2
ENSG00000057252	1576.19	-0.33878	0.118343	-2.86269	0.00420058	0.037415	SOAT1
ENSG00000057294	757.014	0.534097	0.267326	1.99792	0.045725	0.219758	PKP2
ENSG00000057468	6.54243	-0.0842666	1.17384	-0.0717872	0.942771	NA	MSH4
ENSG00000057608	12622.9	0.165148	0.0747926	2.20808	0.0272389	0.154206	GDI2
ENSG00000057657	230.49	0.086572	0.317615	0.272569	0.785185	0.943894	PRDM1
ENSG00000057663	618.966	0.0355095	0.188231	0.188648	0.850369	0.963889	ATG5
ENSG00000057704	3099.27	0.316991	0.194096	1.63316	0.102435	0.371775	TMCC3
ENSG00000057757	985.175	0.0159321	0.117598	0.13548	0.892233	0.9763	PITHD1
ENSG00000057935	1499.13	-0.046311	0.130762	-0.354162	0.723217	0.923477	MTA3
ENSG00000058056	1208.12	0.236283	0.194837	1.21272	0.225236	0.577059	USP13
ENSG00000058063	3523.48	-0.0497377	0.166374	-0.298951	0.764978	0.939815	ATP11B
ENSG00000058085	558.591	0.136562	0.271623	0.502763	0.615131	0.878192	LAMC2
ENSG00000058091	918.875	0.0274182	0.212398	0.129089	0.897287	0.976899	CDK14
ENSG00000058262	17289.2	-0.0398273	0.0909947	-0.437689	0.661612	0.898175	SEC61A1
ENSG00000058272	3367.77	0.112628	0.0759839	1.48226	0.13827	0.441969	PPP1R12A
ENSG00000058335	1.74742	0.719536	2.97998	0.241457	0.809201	NA	RASGRF1
ENSG00000058404	117.788	0.688554	0.425697	1.61748	0.105775	0.378619	CAMK2B
ENSG00000058453	405.041	-0.260299	0.20307	-1.28182	0.199904	0.540708	CROCC
ENSG00000058600	1006.29	0.499276	0.137948	3.61929	0.000295408	0.00434377	POLR3E
ENSG00000058668	12857.6	-0.267082	0.115028	-2.32188	0.0202395	0.123609	ATP2B4
ENSG00000058673	3836.88	-0.122897	0.190411	-0.645427	0.51865	0.826028	ZC3H11A
ENSG00000058729	974.887	-0.232167	0.120809	-1.92177	0.054635	0.247403	RIOK2
ENSG00000058799	529.913	0.231443	0.186977	1.23781	0.215785	0.564021	YIPF1
ENSG00000058804	1348.27	0.294187	0.158421	1.857	0.0633109	0.27311	NDC1
ENSG00000058866	8.12319	-0.0849052	1.14441	-0.074191	0.940858	NA	DGKG
ENSG00000059122	1373.68	-0.390506	0.132348	-2.9506	0.00317155	0.0304052	FLYWCH1
ENSG00000059145	923.25	-0.410624	0.248579	-1.65188	0.0985581	0.363041	UNKL
ENSG00000059377	164.48	-0.735811	0.254509	-2.8911	0.00383901	0.0348766	TBXAS1
ENSG00000059378	1409.49	-0.133653	0.139717	-0.956602	0.338768	0.695646	PARP12
ENSG00000059573	2743.95	0.269478	0.100543	2.68022	0.0073574	0.0573633	ALDH18A1
ENSG00000059588	1267.15	-0.0752126	0.164262	-0.457883	0.647037	0.891122	TARBP1
ENSG00000059691	511.426	-0.0599048	0.15231	-0.393307	0.694093	0.911527	GATB
ENSG00000059728	1004.84	-0.410167	0.174745	-2.34723	0.0189134	0.116981	MXD1
ENSG00000059758	6134	0.377397	0.125022	3.01865	0.00253908	0.0255345	CDK17
ENSG00000059769	314.059	-0.129759	0.198792	-0.652736	0.513926	0.823025	DNAJC25
ENSG00000059804	2707.51	-0.985719	0.181509	-5.43068	5.61384e-08	2.30219e-06	SLC2A3
ENSG00000059915	2.75221	0.982228	1.92452	0.510376	0.609788	NA	PSD
ENSG00000060069	839.7	-0.222375	0.113984	-1.95093	0.0510654	0.236681	CTDP1
ENSG00000060138	12412.7	-0.241422	0.0843982	-2.86051	0.00422966	0.037605	YBX3
ENSG00000060140	532.939	0.405056	0.224174	1.80688	0.0707813	0.294189	STYK1
ENSG00000060237	13240.8	-0.90558	0.0768812	-11.7789	5.01149e-32	5.6175e-29	WNK1
ENSG00000060339	3775.25	0.0863032	0.0910457	0.947911	0.343175	0.699235	CCAR1
ENSG00000060491	1091.57	-0.0772884	0.15358	-0.503244	0.614793	0.877974	OGFR
ENSG00000060558	2.33099	2.6172	1.92131	1.3622	0.173136	NA	GNA15
ENSG00000060642	228.493	-0.091817	0.197714	-0.464394	0.642366	0.889408	PIGV
ENSG00000060656	100.996	0.670204	0.393635	1.7026	0.0886429	0.33903	PTPRU
ENSG00000060688	1424.08	0.0703118	0.125866	0.558625	0.576418	0.855439	SNRNP40
ENSG00000060718	3.70454	-2.00946	2.1563	-0.931901	0.351388	NA	COL11A1
ENSG00000060749	2291.42	-0.0176404	0.1463	-0.120577	0.904026	0.979076	QSER1
ENSG00000060762	492.541	-0.245764	0.145793	-1.68571	0.0918521	0.347023	MPC1
ENSG00000060971	1097.99	0.00960751	0.128749	0.0746218	0.940516	0.988465	ACAA1
ENSG00000060982	13768.3	-0.19127	0.117847	-1.62303	0.104583	0.376386	BCAT1
ENSG00000061273	5743.34	0.0586765	0.0891249	0.658362	0.510305	0.820479	HDAC7
ENSG00000061337	1.98299	-1.40531	2.45799	-0.571732	0.567504	NA	LZTS1
ENSG00000061455	18.3592	0.212486	0.846837	0.250917	0.801878	0.948045	PRDM6
ENSG00000061656	43.0798	0.438225	0.468724	0.934932	0.349823	0.70487	SPAG4
ENSG00000061676	14440.1	-0.231402	0.0888576	-2.60419	0.00920905	0.068327	NCKAP1
ENSG00000061794	1545.23	0.128765	0.11586	1.11138	0.266403	0.622119	MRPS35
ENSG00000061918	47.5544	-0.382084	0.735518	-0.519477	0.603428	0.870351	GUCY1B1
ENSG00000061936	1752.13	-0.0046214	0.106757	-0.0432888	0.965471	0.993638	SFSWAP
ENSG00000061938	1343.2	-0.114467	0.20078	-0.57011	0.568603	0.850686	TNK2
ENSG00000061987	1775.06	0.0348438	0.105829	0.329245	0.74197	0.930544	MON2
ENSG00000062038	42.167	0.160678	0.481644	0.333603	0.738679	0.929357	CDH3
ENSG00000062096	0.370808	1.68917	4.04393	0.417706	0.676162	NA	ARSF
ENSG00000062194	2628.17	0.0785391	0.0996955	0.78779	0.43082	0.769445	GPBP1
ENSG00000062282	16.6011	-0.215228	1.25268	-0.171814	0.863584	0.967309	DGAT2
ENSG00000062370	316.271	-0.0856318	0.172752	-0.495692	0.620112	0.879935	ZNF112
ENSG00000062485	8311.48	0.0637341	0.0761508	0.836946	0.402623	0.749268	CS
ENSG00000062524	32.9646	-1.26361	0.621918	-2.03179	0.0421746	0.208088	LTK
ENSG00000062582	771.74	0.0408423	0.143584	0.284449	0.776066	0.941911	MRPS24
ENSG00000062598	1455.05	-0.347994	0.121155	-2.87232	0.00407474	0.0366299	ELMO2
ENSG00000062650	3279.71	0.10425	0.0935223	1.1147	0.264978	0.620652	WAPL
ENSG00000062716	5650.44	-0.296041	0.0761517	-3.88751	0.000101277	0.00173624	VMP1
ENSG00000062725	2339.87	0.195614	0.147566	1.3256	0.184971	0.518382	APPBP2
ENSG00000062822	564.747	0.163084	0.277446	0.587804	0.556664	0.845409	POLD1
ENSG00000063046	23425.3	0.265831	0.0935495	2.84161	0.00448867	0.039403	EIF4B
ENSG00000063127	37.086	0.846292	0.59145	1.43088	0.152466	0.466947	SLC6A16
ENSG00000063169	562.283	-0.0611505	0.235216	-0.259976	0.794883	0.945631	BICRA
ENSG00000063176	344.538	0.0591124	0.228742	0.258424	0.79608	0.946107	SPHK2
ENSG00000063177	11354.6	0.160986	0.0773821	2.08041	0.037488	0.191608	RPL18
ENSG00000063180	63.058	-0.386596	0.401262	-0.963449	0.335322	0.692329	CA11
ENSG00000063241	406.929	0.175938	0.203696	0.863729	0.387737	0.736997	ISOC2
ENSG00000063244	4466.35	0.0784386	0.103848	0.755322	0.450056	0.781763	U2AF2
ENSG00000063245	3456.85	-0.156032	0.106342	-1.46727	0.142303	0.449408	EPN1
ENSG00000063322	1196.26	-0.117757	0.117747	-1.00008	0.317271	0.676412	MED29
ENSG00000063438	1000.94	-1.61978	0.251746	-6.4342	1.24121e-10	8.29677e-09	AHRR
ENSG00000063587	185.442	5.70565	3.39257	1.68181	0.092606	0.349057	ZNF275
ENSG00000063601	1095.45	0.0390974	0.146942	0.266074	0.790183	0.944357	MTMR1
ENSG00000063660	2101.44	-1.39086	0.232115	-5.99213	2.07116e-09	1.13037e-07	GPC1
ENSG00000063761	126.173	-0.327163	0.311239	-1.05116	0.293184	0.65149	ADCK1
ENSG00000063854	883.679	-0.292275	0.163006	-1.79304	0.0729667	0.300027	HAGH
ENSG00000063978	2757.91	0.0849285	0.0958155	0.886376	0.375415	0.728145	RNF4
ENSG00000064012	504.659	-0.0279805	0.167329	-0.167218	0.867198	0.967893	CASP8
ENSG00000064042	2597.12	0.413693	0.175583	2.3561	0.0184678	0.114907	LIMCH1
ENSG00000064102	1354.44	0.061092	0.112369	0.543674	0.586666	0.861806	INTS13
ENSG00000064115	2413.16	0.0076149	0.141734	0.0537266	0.957153	0.992217	TM7SF3
ENSG00000064195	0.460294	1.16609	4.05695	0.28743	0.773783	NA	DLX3
ENSG00000064199	183.66	-0.112541	0.255325	-0.440776	0.659375	0.896362	SPA17
ENSG00000064205	1.38013	1.12538	3.56146	0.315987	0.752012	NA	CCN5
ENSG00000064225	784.098	0.0437603	0.130223	0.336042	0.736839	0.928722	ST3GAL6
ENSG00000064300	0.573005	0.987339	4.00045	0.246807	0.805058	NA	NGFR
ENSG00000064309	80.6719	0.591439	0.43492	1.35988	0.173868	0.502102	CDON
ENSG00000064313	2038.42	0.0551266	0.0964361	0.571638	0.567567	0.850014	TAF2
ENSG00000064393	7965.18	-0.705686	0.114319	-6.17295	6.70281e-10	4.06972e-08	HIPK2
ENSG00000064419	2601.52	0.0580981	0.0941615	0.617005	0.537232	0.835283	TNPO3
ENSG00000064489	59.218	-0.138973	0.408535	-0.340173	0.733726	0.927979	BORCS8-MEF2B
ENSG00000064490	679.948	-0.0723472	0.137733	-0.525273	0.599393	0.867709	RFXANK
ENSG00000064545	237.587	-0.560242	0.251759	-2.22531	0.0260606	0.148923	TMEM161A
ENSG00000064547	24.7367	-0.265401	0.559871	-0.47404	0.635471	0.887066	LPAR2
ENSG00000064601	488.515	-0.160261	0.178425	-0.8982	0.369079	0.723144	CTSA
ENSG00000064607	2922.41	0.0445835	0.0976671	0.456484	0.648042	0.891836	SUGP2
ENSG00000064651	9193.41	-0.361813	0.230422	-1.57022	0.116365	0.400225	SLC12A2
ENSG00000064652	328.685	-0.250395	0.202533	-1.23631	0.216342	0.564567	SNX24
ENSG00000064666	5317.27	0.34046	0.166356	2.04658	0.040699	0.202827	CNN2
ENSG00000064687	462.04	-0.976154	0.231572	-4.21533	2.49416e-05	0.000522198	ABCA7
ENSG00000064692	538.789	1.32002	0.16488	8.00594	1.18557e-15	1.89847e-13	SNCAIP
ENSG00000064703	1083.15	0.0973181	0.125325	0.776526	0.437438	0.773399	DDX20
ENSG00000064726	4215.48	0.0537742	0.0972146	0.55315	0.580161	0.857529	BTBD1
ENSG00000064763	1474.99	-0.226584	0.114552	-1.97801	0.0479279	0.226258	FAR2
ENSG00000064787	4.4964	-1.30022	1.33915	-0.970923	0.331586	NA	BCAS1
ENSG00000064886	1.87054	0.727755	2.24942	0.32353	0.746294	NA	CHI3L2
ENSG00000064932	311.971	0.0973523	1.1138	0.0874052	0.930349	0.986969	SBNO2
ENSG00000064933	656.031	0.0826193	0.175277	0.471363	0.637382	0.887886	PMS1
ENSG00000064961	1593.79	0.156696	0.101212	1.54819	0.121577	0.410098	HMG20B
ENSG00000064989	27512.9	-0.696109	0.102036	-6.82219	8.96623e-12	7.13967e-10	CALCRL
ENSG00000064995	1167.54	-0.0715396	0.122796	-0.582589	0.56017	0.846427	TAF11
ENSG00000064999	1456.68	0.0677036	0.117733	0.57506	0.565251	0.848836	ANKS1A
ENSG00000065000	188.811	-0.794097	0.263892	-3.00918	0.00261956	0.0261453	AP3D1
ENSG00000065029	639.079	0.228906	0.180192	1.27034	0.203962	0.54722	ZNF76
ENSG00000065054	7217.34	-2.17511	0.154013	-14.1229	2.7451e-45	2.00008e-41	NHERF2
ENSG00000065057	73.4708	-2.06365	0.758613	-2.7203	0.00652228	0.0523363	NTHL1
ENSG00000065060	1601.83	-0.075796	0.0980206	-0.773265	0.439365	0.775045	BLTP3A
ENSG00000065135	6611.75	-0.191639	0.0736434	-2.60225	0.00926137	0.0685408	GNAI3
ENSG00000065150	6728.59	0.473007	0.124185	3.80889	0.00013959	0.00229324	IPO5
ENSG00000065154	3400.08	0.0636332	0.105314	0.604223	0.545695	0.839956	OAT
ENSG00000065183	1621.39	0.368049	0.110898	3.3188	0.000904042	0.0110983	WDR3
ENSG00000065243	3163.16	0.130506	0.120705	1.0812	0.279608	0.637237	PKN2
ENSG00000065268	452.321	-0.0385057	0.228405	-0.168585	0.866123	0.967738	WDR18
ENSG00000065308	13266.3	-0.0250187	0.10651	-0.234895	0.81429	0.953127	TRAM2
ENSG00000065320	5.80192	-0.0208919	1.12666	-0.0185433	0.985205	NA	NTN1
ENSG00000065328	338.013	2.381	0.439431	5.41837	6.01447e-08	2.44812e-06	MCM10
ENSG00000065357	1798.07	-0.518446	0.119358	-4.34361	1.40159e-05	0.000313732	DGKA
ENSG00000065361	21.0425	1.03344	0.647148	1.59692	0.110284	0.387478	ERBB3
ENSG00000065413	40.2166	0.45155	0.611881	0.73797	0.460533	0.78831	ANKRD44
ENSG00000065427	5007.1	0.16599	0.0840478	1.97495	0.0482743	0.227581	KARS1
ENSG00000065457	957.668	0.0410544	0.123317	0.332918	0.739196	0.929545	ADAT1
ENSG00000065485	2219.93	-0.0609996	0.0870413	-0.700812	0.483421	0.803153	PDIA5
ENSG00000065491	787.699	0.0557638	0.161604	0.345064	0.730046	0.927086	TBC1D22B
ENSG00000065518	1876.31	-0.0992591	0.113518	-0.874389	0.381906	0.733043	NDUFB4
ENSG00000065526	4876.62	-0.0937116	0.0913481	-1.02587	0.304951	0.664103	SPEN
ENSG00000065534	1055.1	-0.230855	0.253928	-0.909136	0.363279	0.717303	MYLK
ENSG00000065548	2636.02	0.0434775	0.10656	0.40801	0.683266	0.906955	ZC3H15
ENSG00000065559	1430.81	-0.0248277	0.0973201	-0.255114	0.798635	0.946953	MAP2K4
ENSG00000065600	497.974	-0.197571	0.180488	-1.09465	0.27367	0.631571	PACC1
ENSG00000065609	1.56479	-0.912628	2.20833	-0.413266	0.679412	NA	SNAP91
ENSG00000065613	6266.64	-0.533932	0.0981872	-5.4379	5.39133e-08	2.22557e-06	SLK
ENSG00000065615	676.717	-0.0505236	0.14413	-0.350542	0.725932	0.924569	CYB5R4
ENSG00000065618	6.2381	-2.12215	1.44759	-1.46599	0.142652	NA	COL17A1
ENSG00000065621	24.4515	-0.775668	0.575548	-1.3477	0.177754	0.507625	GSTO2
ENSG00000065665	227.652	-0.145835	0.193472	-0.753776	0.450984	0.782339	SEC61A2
ENSG00000065675	27.4369	0.282066	0.578546	0.487542	0.625874	0.88164	PRKCQ
ENSG00000065717	716.162	0.541635	0.190432	2.84424	0.00445174	0.0391731	TLE2
ENSG00000065802	837.526	0.226013	0.205869	1.09785	0.272271	0.629604	ASB1
ENSG00000065809	9142.89	0.192845	0.115745	1.66613	0.0956883	0.356161	FAM107B
ENSG00000065833	2144.93	-0.268367	0.116571	-2.30219	0.0213246	0.128406	ME1
ENSG00000065882	3241.55	-0.562226	0.104516	-5.37934	7.47607e-08	2.98469e-06	TBC1D1
ENSG00000065883	1184.38	0.148128	0.188813	0.784525	0.432732	0.770885	CDK13
ENSG00000065911	3024.7	0.326924	0.207229	1.5776	0.114658	0.396489	MTHFD2
ENSG00000065923	1516.35	0.476686	0.143726	3.31664	0.000911071	0.0111752	SLC9A7
ENSG00000065970	1285.1	-0.0906382	0.108297	-0.836942	0.402625	0.749268	FOXJ2
ENSG00000065978	19909.6	0.0274898	0.0745146	0.368918	0.712189	0.918871	YBX1
ENSG00000065989	455.878	-0.14881	0.24198	-0.61497	0.538575	0.835948	PDE4A
ENSG00000066027	1721.47	-0.0486812	0.117773	-0.413349	0.679351	0.90494	PPP2R5A
ENSG00000066044	3614.47	0.0175106	0.0869467	0.201394	0.84039	0.960634	ELAVL1
ENSG00000066056	18686.9	0.0869961	0.100348	0.866946	0.385972	0.735501	TIE1
ENSG00000066084	4279.37	-0.306585	0.119737	-2.56048	0.0104528	0.0752933	DIP2B
ENSG00000066117	3943.23	0.0851444	0.0782089	1.08868	0.276296	0.634344	SMARCD1
ENSG00000066135	2291.33	0.164049	0.0905829	1.81104	0.0701342	0.292074	KDM4A
ENSG00000066136	961.234	0.150596	0.141377	1.06521	0.286782	0.645104	NFYC
ENSG00000066185	8.99196	0.260116	0.907101	0.286755	0.7743	NA	ZMYND12
ENSG00000066248	26.7982	-3.36521	0.88268	-3.8125	0.000137571	0.00226518	NGEF
ENSG00000066279	2040.25	2.56682	0.260413	9.85673	6.41049e-23	2.52469e-20	ASPM
ENSG00000066294	27.5274	-0.215671	0.519728	-0.414969	0.678165	0.904616	CD84
ENSG00000066322	3372.78	-0.486506	0.0811065	-5.99837	1.99311e-09	1.09599e-07	ELOVL1
ENSG00000066336	0.323237	-1.59047	4.04362	-0.393329	0.694077	NA	SPI1
ENSG00000066379	139.991	0.847502	1.49371	0.567381	0.570455	0.852246	POLR1H
ENSG00000066382	8.78007	0.0238296	1.15626	0.0206092	0.983557	NA	MPPED2
ENSG00000066422	1276.91	-0.348146	0.125737	-2.76883	0.00562575	0.0468484	ZBTB11
ENSG00000066427	339.754	-0.286458	0.171325	-1.67201	0.0945222	0.352812	ATXN3
ENSG00000066455	2125.01	0.0787728	0.145967	0.539663	0.589429	0.863007	GOLGA5
ENSG00000066468	14.5659	-0.302966	0.737083	-0.411034	0.681048	0.905997	FGFR2
ENSG00000066557	864.019	0.0679578	0.112299	0.605152	0.545078	0.83945	LRRC40
ENSG00000066583	521.028	0.426763	0.142749	2.9896	0.0027934	0.0275595	ISOC1
ENSG00000066629	1598.03	-0.0658334	0.157011	-0.419292	0.675003	0.903227	EML1
ENSG00000066651	202.592	0.108318	0.264844	0.408986	0.68255	0.906611	TRMT11
ENSG00000066654	2077.21	0.1104	0.123151	0.896462	0.370006	0.723892	THUMPD1
ENSG00000066697	2331.81	0.197202	0.0991231	1.98947	0.0466499	0.222343	MSANTD3
ENSG00000066735	540.392	-1.08487	0.224666	-4.82879	1.37363e-06	4.08501e-05	KIF26A
ENSG00000066739	2610	-0.219594	0.153178	-1.43358	0.151691	0.465479	ATG2B
ENSG00000066777	4088.7	-0.000354479	0.0824346	-0.00430013	0.996569	1	ARFGEF1
ENSG00000066813	24.3346	-3.32552	1.06084	-3.13481	0.00171966	0.018521	ACSM2B
ENSG00000066827	456.668	0.0201811	0.153947	0.131091	0.895703	0.976679	ZFAT
ENSG00000066855	1089.77	0.0286684	0.125623	0.228209	0.819484	0.954152	MTFR1
ENSG00000066923	182.066	0.127476	0.235393	0.541544	0.588132	0.862373	STAG3
ENSG00000066926	387.762	-0.588689	0.214194	-2.74839	0.00598889	0.0490348	FECH
ENSG00000066933	2479.84	-0.225032	0.16104	-1.39737	0.162303	0.484042	MYO9A
ENSG00000067048	2558.65	-0.197008	0.168281	-1.17071	0.241715	0.593425	DDX3Y
ENSG00000067057	8177.26	0.851721	0.131046	6.49942	8.06295e-11	5.56841e-09	PFKP
ENSG00000067064	2615.09	-0.0679756	0.161145	-0.421829	0.67315	0.902981	IDI1
ENSG00000067066	7303.65	-0.0729686	0.0919518	-0.793552	0.427456	0.768021	SP100
ENSG00000067082	16669.5	-0.214956	0.109419	-1.96452	0.0494693	0.231514	KLF6
ENSG00000067113	1495.69	-1.6275	0.301882	-5.39118	6.99968e-08	2.81766e-06	PLPP1
ENSG00000067141	12.2537	1.18916	0.769582	1.5452	0.122298	0.411626	NEO1
ENSG00000067167	13081.3	-0.0590924	0.107064	-0.551936	0.580992	0.85795	TRAM1
ENSG00000067177	564.57	0.590007	0.20911	2.82152	0.00477968	0.0414087	PHKA1
ENSG00000067182	4867.36	-0.062242	0.144535	-0.430636	0.666733	0.901197	TNFRSF1A
ENSG00000067191	182.885	-0.212233	0.370408	-0.57297	0.566665	0.849868	CACNB1
ENSG00000067208	2921.66	-0.165743	0.172672	-0.959871	0.33712	0.694251	EVI5
ENSG00000067221	291.717	0.137732	0.262569	0.524554	0.599893	0.86826	STOML1
ENSG00000067225	27051.1	-0.420154	0.134987	-3.11255	0.00185476	0.0197425	PKM
ENSG00000067248	2464.06	0.00869599	0.114298	0.0760816	0.939354	0.988181	DHX29
ENSG00000067334	2644.04	-0.168254	0.105386	-1.59655	0.110366	0.387625	DNTTIP2
ENSG00000067365	369.873	0.0425847	0.188599	0.225794	0.821361	0.954152	METTL22
ENSG00000067369	4303.35	0.161139	0.101702	1.58442	0.113098	0.393239	TP53BP1
ENSG00000067445	91.1803	1.13722	0.355242	3.20124	0.00136835	0.0153737	TRO
ENSG00000067533	1054.88	-0.0862909	0.176832	-0.487983	0.625562	0.88164	RRP15
ENSG00000067560	29150	-0.533643	0.0708484	-7.53218	4.9902e-14	6.00968e-12	RHOA
ENSG00000067596	2735.61	-0.0965059	0.0976544	-0.988239	0.323036	0.68023	DHX8
ENSG00000067601	52.6474	0.232974	0.45331	0.513939	0.607295	0.873507	PMS2P4
ENSG00000067606	10.9503	-0.854857	0.990429	-0.863118	0.388072	NA	PRKCZ
ENSG00000067646	341.649	-0.0616807	1.08091	-0.0570635	0.954495	0.990984	ZFY
ENSG00000067704	4580.26	0.0941029	0.0880535	1.0687	0.285204	0.642646	IARS2
ENSG00000067715	74.0806	2.02662	0.438638	4.62027	3.83245e-06	0.000102471	SYT1
ENSG00000067798	2060.42	-0.00506289	0.202409	-0.0250131	0.980045	0.996784	NAV3
ENSG00000067829	1200.44	-0.157092	0.113459	-1.38457	0.166183	0.48902	IDH3G
ENSG00000067836	172.48	0.279878	0.287482	0.973548	0.330281	0.687256	ROGDI
ENSG00000067840	5.3629	-2.38171	1.80074	-1.32262	0.185961	NA	PDZD4
ENSG00000067842	4.45959	3.11077	1.98831	1.56453	0.117694	NA	ATP2B3
ENSG00000067900	5166.39	0.0649889	0.101886	0.637861	0.523564	0.828005	ROCK1
ENSG00000067955	980.745	0.519443	0.130864	3.96934	7.20707e-05	0.00129977	CBFB
ENSG00000067992	44.4269	-1.7541	0.817525	-2.14563	0.0319029	0.172372	PDK3
ENSG00000068001	9827.13	-1.39421	0.114329	-12.1947	3.31801e-34	5.40649e-31	HYAL2
ENSG00000068024	457.325	-0.0274565	0.1885	-0.145658	0.884192	0.973934	HDAC4
ENSG00000068028	590.345	-0.121711	0.170219	-0.715023	0.474595	0.797809	RASSF1
ENSG00000068078	26.2206	-2.20131	0.807981	-2.72446	0.00644076	0.0517963	FGFR3
ENSG00000068079	185.75	-0.12473	0.2633	-0.473719	0.635701	0.887163	IFI35
ENSG00000068097	598.005	0.285179	0.154349	1.84763	0.064656	0.277189	HEATR6
ENSG00000068120	1289.33	-0.0699915	0.133802	-0.523098	0.600906	0.869035	COASY
ENSG00000068137	244.958	0.263304	0.241684	1.08946	0.275953	0.633904	PLEKHH3
ENSG00000068305	7368.6	-1.35106	0.104173	-12.9694	1.82368e-38	3.79637e-35	MEF2A
ENSG00000068308	1778.3	0.0900074	0.0958795	0.938755	0.347857	0.704172	OTUD5
ENSG00000068323	2457.97	-0.165014	0.100199	-1.64687	0.099585	0.365345	TFE3
ENSG00000068354	690.594	-0.00940688	0.126961	-0.0740926	0.940937	0.988465	TBC1D25
ENSG00000068366	5404.49	0.213215	0.135399	1.57471	0.115323	0.397841	ACSL4
ENSG00000068383	1382.1	-0.599	0.137768	-4.34789	1.37453e-05	0.0003091	INPP5A
ENSG00000068394	636.252	0.220223	0.138346	1.59183	0.111423	0.389553	GPKOW
ENSG00000068400	1338.88	0.0146038	0.157297	0.0928423	0.926029	0.985963	GRIPAP1
ENSG00000068438	1194.84	0.0221975	0.122057	0.181862	0.855691	0.965411	FTSJ1
ENSG00000068489	1770.64	1.37795	0.173787	7.92898	2.20951e-15	3.35385e-13	PRR11
ENSG00000068615	18.042	-0.995997	0.737772	-1.35001	0.177014	0.50652	REEP1
ENSG00000068650	4281.64	0.194233	0.121885	1.59358	0.11103	0.388918	ATP11A
ENSG00000068654	3343.36	0.0447782	0.126066	0.355196	0.722443	0.922973	POLR1A
ENSG00000068697	8580.75	0.0653026	0.0660007	0.989422	0.322457	0.679416	LAPTM4A
ENSG00000068724	646.746	-0.240428	0.130304	-1.84513	0.0650179	0.277842	TTC7A
ENSG00000068745	1463.14	0.00756049	0.12087	0.0625508	0.950124	0.990457	IP6K2
ENSG00000068781	35.1372	-0.0491441	0.557008	-0.0882287	0.929695	0.986969	STON1-GTF2A1L
ENSG00000068784	887.317	0.0292812	0.116901	0.250478	0.802218	0.948241	SRBD1
ENSG00000068796	1966.65	0.305999	0.0992378	3.08349	0.0020459	0.021397	KIF2A
ENSG00000068831	27.8702	0.520277	0.550716	0.944728	0.344798	0.700557	RASGRP2
ENSG00000068878	5891.73	0.0961206	0.0880393	1.09179	0.274925	0.633052	PSME4
ENSG00000068885	977.346	-0.0323848	0.153101	-0.211526	0.832477	0.957801	IFT80
ENSG00000068903	1850.36	-0.13868	0.0957636	-1.44815	0.147575	0.458978	SIRT2
ENSG00000068912	2591.04	0.0203564	0.121483	0.167565	0.866925	0.967881	ERLEC1
ENSG00000068971	631.208	-0.243862	0.145016	-1.68162	0.0926421	0.349061	PPP2R5B
ENSG00000068976	15.8153	-0.70369	0.940718	-0.748035	0.454439	0.783809	PYGM
ENSG00000069011	4.62991	-0.43605	1.70156	-0.256265	0.797746	NA	PITX1
ENSG00000069020	7433.06	0.285305	0.121659	2.34512	0.0190211	0.117447	MAST4
ENSG00000069122	2011.4	-0.271601	0.215614	-1.25966	0.207792	0.553555	ADGRF5
ENSG00000069188	0.456867	-1.86927	4.01057	-0.466085	0.641155	NA	SDK2
ENSG00000069248	2070.1	-0.0980888	0.143687	-0.682655	0.494825	0.810312	NUP133
ENSG00000069275	14122.2	0.342245	0.0835986	4.0939	4.24175e-05	0.000829674	NUCKS1
ENSG00000069329	4140.01	0.0707268	0.111071	0.63677	0.524275	0.828134	VPS35
ENSG00000069345	2619.92	-0.00585764	0.0870109	-0.0673208	0.946326	0.989674	DNAJA2
ENSG00000069399	481.067	-1.02925	0.336593	-3.05785	0.00222931	0.022922	BCL3
ENSG00000069424	36.1263	0.638251	0.566721	1.12622	0.260073	0.615445	KCNAB2
ENSG00000069431	490.607	0.276066	0.150886	1.82963	0.0673057	0.283954	ABCC9
ENSG00000069482	24.1446	1.47758	0.791023	1.86794	0.061771	0.268374	GAL
ENSG00000069493	173.824	0.350795	0.286127	1.22601	0.220196	0.569766	CLEC2D
ENSG00000069509	357.585	-0.0206141	0.193611	-0.106472	0.915208	0.983367	FUNDC1
ENSG00000069667	2004.64	-0.492636	0.151595	-3.24968	0.00115534	0.0134041	RORA
ENSG00000069702	1858.37	0.389093	0.218427	1.78134	0.0748566	0.305122	TGFBR3
ENSG00000069812	462.352	-0.892574	0.215292	-4.14588	3.38514e-05	0.000680389	HES2
ENSG00000069849	11767.4	-0.0526997	0.155474	-0.338961	0.734639	0.927979	ATP1B3
ENSG00000069869	3694.39	0.0871172	0.0846526	1.02911	0.303426	0.662984	NEDD4
ENSG00000069943	432.012	-0.0148546	0.15859	-0.0936666	0.925374	0.985916	PIGB
ENSG00000069956	2513.76	-0.0122181	0.141416	-0.0863984	0.93115	0.986969	MAPK6
ENSG00000069966	688.926	-0.214522	0.132733	-1.61619	0.106053	0.379519	GNB5
ENSG00000069974	1671.35	-0.26397	0.154465	-1.70893	0.0874641	0.336198	RAB27A
ENSG00000069998	692.165	0.157994	0.132779	1.1899	0.234086	0.586301	HDHD5
ENSG00000070010	3427.25	-0.0231301	0.0865756	-0.267166	0.789341	0.944063	UFD1
ENSG00000070018	3107.32	0.0156474	0.113084	0.13837	0.889948	0.975429	LRP6
ENSG00000070047	274.695	2.74622	2.46208	1.11541	0.264675	0.620314	PHRF1
ENSG00000070061	1678.93	-0.0936569	0.118096	-0.793059	0.427743	0.768093	ELP1
ENSG00000070081	4051.11	-0.0074819	0.141147	-0.0530077	0.957726	0.992217	NUCB2
ENSG00000070087	4081.97	-0.224732	0.107059	-2.09915	0.0358036	0.185678	PFN2
ENSG00000070159	5.42063	0.525505	1.41374	0.371714	0.710106	NA	PTPN3
ENSG00000070182	65.2577	-0.102007	0.363276	-0.280798	0.778865	0.942608	SPTB
ENSG00000070190	22.1675	-0.0220443	0.56016	-0.0393535	0.968609	0.994781	DAPP1
ENSG00000070214	5510.82	-0.00985001	0.122078	-0.0806861	0.935692	0.987576	SLC44A1
ENSG00000070269	700.103	0.127975	0.20513	0.623875	0.53271	0.831795	TMEM260
ENSG00000070366	2144.64	-0.180173	0.0849133	-2.12184	0.0338511	0.178789	SMG6
ENSG00000070367	5738.65	0.237069	0.137128	1.72882	0.0838417	0.328586	EXOC5
ENSG00000070371	171.855	-0.0907445	0.266446	-0.340574	0.733424	0.927731	CLTCL1
ENSG00000070388	5.02197	-1.62059	1.21108	-1.33814	0.180851	NA	FGF22
ENSG00000070404	331.431	0.0303701	0.215616	0.140853	0.887986	0.9748	FSTL3
ENSG00000070413	1847.45	-0.139664	0.125339	-1.11429	0.265155	0.620696	DGCR2
ENSG00000070423	947.039	-0.0829852	0.14075	-0.589591	0.555465	0.844631	RNF126
ENSG00000070444	886.364	-0.173707	0.149939	-1.15852	0.246652	0.600337	MNT
ENSG00000070476	626.019	-0.0404551	0.153198	-0.26407	0.791726	0.944784	ZXDC
ENSG00000070495	673.805	-0.157469	0.126294	-1.24685	0.212453	0.559349	JMJD6
ENSG00000070501	391.04	0.0473081	0.155393	0.304441	0.760792	0.937607	POLB
ENSG00000070526	32.5842	-2.93308	0.748907	-3.91648	8.985e-05	0.00157556	ST6GALNAC1
ENSG00000070540	1555.15	0.152544	0.164463	0.927527	0.353653	0.707501	WIPI1
ENSG00000070601	52.2441	-0.2149	0.382068	-0.562465	0.573799	0.854033	FRMPD1
ENSG00000070610	1728.63	0.410107	0.125918	3.25693	0.00112623	0.0131502	GBA2
ENSG00000070614	9944.21	0.211817	0.112654	1.88024	0.0600751	0.262572	NDST1
ENSG00000070669	990.047	0.232291	0.247166	0.939818	0.347311	0.703799	ASNS
ENSG00000070718	1010.45	-0.383775	0.120388	-3.18781	0.00143354	0.0159097	AP3M2
ENSG00000070729	2.67498	-1.59884	2.5515	-0.626628	0.530903	NA	CNGB1
ENSG00000070731	8.25812	-0.405554	0.95392	-0.425145	0.670731	NA	ST6GALNAC2
ENSG00000070756	50158.5	0.218742	0.0791029	2.76528	0.00568745	0.0471968	PABPC1
ENSG00000070759	115.306	-0.159924	0.352344	-0.453885	0.649912	0.892648	TESK2
ENSG00000070761	777.362	0.0295262	0.155666	0.189676	0.849563	0.963889	CFAP20
ENSG00000070770	6408.93	0.271303	0.110298	2.45972	0.0139045	0.0929007	CSNK2A2
ENSG00000070778	1140.41	0.209709	0.142855	1.46798	0.142109	0.449201	PTPN21
ENSG00000070785	788.576	0.179211	0.151843	1.18024	0.237904	0.589627	EIF2B3
ENSG00000070808	4.22125	-0.759621	1.3948	-0.544609	0.586023	NA	CAMK2A
ENSG00000070814	914.386	0.387231	0.204177	1.89655	0.0578871	0.256885	TCOF1
ENSG00000070831	16733.3	-0.00594469	0.0682256	-0.0871328	0.930566	0.986969	CDC42
ENSG00000070882	2512.88	-0.213539	0.127064	-1.68057	0.0928473	0.349424	OSBPL3
ENSG00000070915	0.323273	-1.67054	4.04118	-0.413378	0.67933	NA	SLC12A3
ENSG00000070950	637.908	0.0690022	0.180343	0.382616	0.702004	0.915252	RAD18
ENSG00000070961	4159.31	0.305206	0.124473	2.45199	0.0142069	0.0944015	ATP2B1
ENSG00000071051	997.364	0.202815	0.127399	1.59197	0.111392	0.389553	NCK2
ENSG00000071054	22422.2	0.273158	0.0935012	2.92144	0.00348423	0.032588	MAP4K4
ENSG00000071073	3968.27	-0.257943	0.160402	-1.6081	0.107812	0.382714	MGAT4A
ENSG00000071082	13038.3	0.204845	0.0657625	3.11492	0.00183996	0.0196002	RPL31
ENSG00000071127	22296.7	0.172505	0.0745596	2.31365	0.0206867	0.125342	WDR1
ENSG00000071189	1843.24	-0.127376	0.151285	-0.841957	0.399812	0.747218	SNX13
ENSG00000071205	844.402	0.236859	0.149596	1.58333	0.113347	0.393821	ARHGAP10
ENSG00000071242	10360.5	-0.0230541	0.0775565	-0.297255	0.766272	0.940173	RPS6KA2
ENSG00000071243	712.021	-0.0713879	0.132673	-0.538073	0.590527	0.863538	ING3
ENSG00000071246	10882.1	0.979415	0.209908	4.66593	3.07218e-06	8.47874e-05	VASH1
ENSG00000071282	399.992	-1.81418	0.207162	-8.75729	2.00004e-18	4.62612e-16	LMCD1
ENSG00000071462	1063.8	-0.147824	0.135934	-1.08747	0.27683	0.635005	BUD23
ENSG00000071537	8773.29	-0.0824386	0.180589	-0.456499	0.648031	0.891836	SEL1L
ENSG00000071539	810.381	1.50575	0.20744	7.25872	3.90772e-13	3.90023e-11	TRIP13
ENSG00000071553	5330.5	-0.355301	0.0904216	-3.92938	8.51639e-05	0.00150974	ATP6AP1
ENSG00000071564	3271.6	0.247895	0.126175	1.9647	0.0494493	0.231514	TCF3
ENSG00000071575	861.476	-0.0749552	0.197701	-0.379135	0.704588	0.915583	TRIB2
ENSG00000071626	3199.08	0.127707	0.0827532	1.54322	0.122777	0.412616	DAZAP1
ENSG00000071655	1609.85	0.0290195	0.14042	0.206663	0.836273	0.958359	MBD3
ENSG00000071794	1335.7	0.497504	0.139322	3.5709	0.000355758	0.00509244	HLTF
ENSG00000071859	1563.48	-0.0252796	0.108234	-0.233564	0.815324	0.95332	FAM50A
ENSG00000071889	531.354	-0.136853	0.164876	-0.830038	0.406517	0.752053	FAM3A
ENSG00000071894	3630.96	0.00636736	0.122933	0.0517955	0.958692	0.992217	CPSF1
ENSG00000071909	8.31677	0.175965	0.991295	0.17751	0.859108	NA	MYO3B
ENSG00000071967	3264.79	-0.0386236	0.132842	-0.290748	0.771244	0.941102	CYBRD1
ENSG00000071994	1689.21	0.259446	0.102022	2.54304	0.0109894	0.0781918	PDCD2
ENSG00000072041	21.4285	1.68091	0.69513	2.41812	0.015601	0.101219	SLC6A15
ENSG00000072042	2529.05	0.140984	0.0801589	1.75881	0.0786098	0.315391	RDH11
ENSG00000072062	4374.34	-0.0481019	0.090712	-0.530271	0.595924	0.866042	PRKACA
ENSG00000072071	392.171	-0.0949131	0.266435	-0.356234	0.721665	0.922708	ADGRL1
ENSG00000072080	15.0183	0.0550915	0.664776	0.0828723	0.933953	0.98755	SPP2
ENSG00000072110	20293.6	0.026957	0.145143	0.185728	0.852658	0.964657	ACTN1
ENSG00000072121	2260.05	-0.211749	0.176516	-1.1996	0.230294	0.581027	ZFYVE26
ENSG00000072133	65.5828	-0.139163	0.671912	-0.207115	0.83592	0.958274	RPS6KA6
ENSG00000072134	2002	0.190424	0.0893119	2.13212	0.032997	0.17634	EPN2
ENSG00000072135	1299.8	0.321023	0.116831	2.74775	0.00600051	0.0490722	PTPN18
ENSG00000072163	1882.04	-1.02513	0.20089	-5.10292	3.34444e-07	1.15761e-05	LIMS2
ENSG00000072195	66.8217	-0.948311	0.513471	-1.84686	0.0647668	0.277486	SPEG
ENSG00000072201	161.426	0.610875	0.304344	2.00718	0.04473	0.216467	LNX1
ENSG00000072210	2913.51	-0.620016	0.137158	-4.52045	6.17084e-06	0.00015405	ALDH3A2
ENSG00000072274	6993.06	0.135235	0.14164	0.954783	0.339687	0.696533	TFRC
ENSG00000072310	1025.42	-0.111005	0.170493	-0.651085	0.514992	0.82349	SREBF1
ENSG00000072364	8096.01	0.067289	0.146028	0.460796	0.644945	0.89006	AFF4
ENSG00000072401	773.377	-0.165235	0.138946	-1.1892	0.23436	0.586463	UBE2D1
ENSG00000072415	1481.03	-0.0719865	0.119933	-0.600224	0.548357	0.840945	PALS1
ENSG00000072422	1746.89	0.565673	0.145425	3.88979	0.000100331	0.00172205	RHOBTB1
ENSG00000072501	3825.68	0.148667	0.113036	1.31521	0.188438	0.523431	SMC1A
ENSG00000072506	910.877	-0.018523	0.119614	-0.154857	0.876934	0.971369	HSD17B10
ENSG00000072518	1359.26	-0.0367063	0.142232	-0.258073	0.79635	0.946295	MARK2
ENSG00000072571	497.309	2.63514	0.344612	7.64668	2.06234e-14	2.68325e-12	HMMR
ENSG00000072609	1825.1	-0.0941569	0.112403	-0.83767	0.402216	0.749021	CHFR
ENSG00000072682	1102.1	-0.636048	0.133836	-4.75244	2.00978e-06	5.73122e-05	P4HA2
ENSG00000072694	0.699625	-3.04342	3.9662	-0.76734	0.44288	NA	FCGR2B
ENSG00000072736	1889.74	0.0283344	0.104463	0.271238	0.786208	0.943894	NFATC3
ENSG00000072756	601.458	0.0468514	0.150303	0.311713	0.755259	0.935723	TRNT1
ENSG00000072778	7329.59	-0.221397	0.10944	-2.02299	0.0430741	0.21141	ACADVL
ENSG00000072786	2824.43	0.115398	0.110107	1.04805	0.294616	0.65347	STK10
ENSG00000072803	2485.01	-0.0964196	0.0903198	-1.06754	0.28573	0.643434	FBXW11
ENSG00000072818	39.4155	-0.236408	0.629551	-0.375518	0.707275	0.916592	ACAP1
ENSG00000072832	3.42905	0.932896	1.89575	0.492098	0.62265	NA	CRMP1
ENSG00000072840	1586.68	0.191461	0.149958	1.27676	0.201688	0.543631	EVC
ENSG00000072849	1509.85	0.0669716	0.127342	0.525919	0.598945	0.867577	DERL2
ENSG00000072858	6.85887	-1.44194	1.03654	-1.39111	0.164193	NA	SIDT1
ENSG00000072864	863.229	-0.4975	0.177211	-2.80739	0.00499452	0.042837	NDE1
ENSG00000072952	40.6575	0.42697	0.570598	0.748286	0.454288	0.783809	IRAG1
ENSG00000072954	186.122	-1.45258	0.231482	-6.27513	3.4935e-10	2.21336e-08	TMEM38A
ENSG00000072958	2102.4	-0.0743873	0.12622	-0.589345	0.55563	0.844631	AP1M1
ENSG00000073008	5809.52	-0.0392076	0.142777	-0.274606	0.783619	0.94332	PVR
ENSG00000073050	639.872	0.473702	0.161335	2.93614	0.00332327	0.0315483	XRCC1
ENSG00000073060	1688.8	0.117231	0.138487	0.846512	0.397267	0.744904	SCARB1
ENSG00000073067	8.40574	-0.19584	0.991613	-0.197497	0.843439	NA	CYP2W1
ENSG00000073111	806.624	0.686988	0.216156	3.17821	0.00148188	0.0163219	MCM2
ENSG00000073146	907.908	0.93294	0.169871	5.49206	3.97278e-08	1.71276e-06	MOV10L1
ENSG00000073150	335.646	-0.385527	0.218855	-1.76157	0.0781427	0.31447	PANX2
ENSG00000073169	461.295	-0.0698708	0.227644	-0.30693	0.758897	0.936697	SELENOO
ENSG00000073282	1.20561	-2.14078	3.21678	-0.665502	0.505729	NA	TP63
ENSG00000073331	388.196	-0.142589	0.210937	-0.675982	0.499052	0.813594	ALPK1
ENSG00000073350	68.8662	-0.214261	0.355788	-0.602216	0.547031	0.840237	LLGL2
ENSG00000073417	1615.53	0.113873	0.103197	1.10345	0.269832	0.626612	PDE8A
ENSG00000073464	848.601	0.41575	0.163964	2.53561	0.0112252	0.0792771	CLCN4
ENSG00000073536	410.662	0.315246	0.19426	1.62281	0.104631	0.376465	NLE1
ENSG00000073578	3991.87	-0.0499375	0.0873071	-0.571975	0.567339	0.850014	SDHA
ENSG00000073584	2172.34	-0.309895	0.127814	-2.42458	0.015326	0.0997459	SMARCE1
ENSG00000073598	0.593844	-1.73449	4.04739	-0.428544	0.668255	NA	FNDC8
ENSG00000073605	244.694	-0.0933127	0.293404	-0.318035	0.750458	0.933702	GSDMB
ENSG00000073614	3340.28	0.177801	0.152572	1.16536	0.243875	0.596166	KDM5A
ENSG00000073670	10.7597	0.711859	0.936153	0.76041	0.44701	NA	ADAM11
ENSG00000073711	1127.07	0.665506	0.150285	4.42828	9.49866e-06	0.000224699	PPP2R3A
ENSG00000073712	5820.63	0.106561	0.100336	1.06204	0.288217	0.646816	FERMT2
ENSG00000073737	15.4316	-0.0686983	1.0485	-0.0655204	0.94776	0.989932	DHRS9
ENSG00000073756	5899.44	-1.0755	0.219478	-4.90024	9.57199e-07	2.98041e-05	PTGS2
ENSG00000073792	4585.69	0.0677735	0.117142	0.578558	0.562887	0.847745	IGF2BP2
ENSG00000073803	646.047	-0.165988	0.142185	-1.1674	0.243048	0.595042	MAP3K13
ENSG00000073849	7844.08	0.619503	0.163116	3.79793	0.000145909	0.00238362	ST6GAL1
ENSG00000073861	0.354756	2.12577	4.02088	0.528683	0.597025	NA	TBX21
ENSG00000073905	0.42275	1.84499	4.04291	0.456352	0.648137	NA	VDAC1P1
ENSG00000073910	1937.78	0.494039	0.200936	2.45868	0.0139447	0.0930487	FRY
ENSG00000073921	11216.2	-0.113037	0.104462	-1.08208	0.279216	0.636843	PICALM
ENSG00000074047	14.0892	0.427594	1.35971	0.314475	0.753161	0.934843	GLI2
ENSG00000074054	3824.3	-0.0323234	0.120164	-0.268995	0.787933	0.944063	CLASP1
ENSG00000074071	789.65	0.0714571	0.140656	0.508029	0.611433	0.876253	MRPS34
ENSG00000074181	24.8346	0.514029	0.814911	0.63078	0.528185	0.829476	NOTCH3
ENSG00000074201	1848.36	0.10212	0.0954669	1.0697	0.284756	0.642356	CLNS1A
ENSG00000074211	4.63595	1.24317	1.30206	0.954776	0.339691	NA	PPP2R2C
ENSG00000074219	1639.7	0.0546689	0.144209	0.379096	0.704617	0.915583	TEAD2
ENSG00000074266	558.922	-0.0600873	0.167492	-0.358748	0.719784	0.921929	EED
ENSG00000074276	0.727651	0.0413276	3.98743	0.0103645	0.991731	NA	CDHR2
ENSG00000074317	4.41041	1.19383	2.20956	0.540301	0.58899	NA	SNCB
ENSG00000074319	1670.76	-0.0341199	0.11882	-0.287156	0.773993	0.941612	TSG101
ENSG00000074356	3113.59	-0.202101	0.0870373	-2.32201	0.0202324	0.123609	NCBP3
ENSG00000074370	59.5912	-2.12147	0.929037	-2.28352	0.0223998	0.133283	ATP2A3
ENSG00000074410	84.9535	0.0182414	0.502424	0.0363069	0.971038	0.994935	CA12
ENSG00000074416	5298.88	0.259682	0.170207	1.52568	0.127089	0.421949	MGLL
ENSG00000074527	14070.4	0.786417	0.184301	4.26702	1.98097e-05	0.000424511	NTN4
ENSG00000074582	467.918	-0.237116	0.209465	-1.13201	0.25763	0.613129	BCS1L
ENSG00000074590	5048.43	0.311011	0.23754	1.3093	0.190433	0.526165	NUAK1
ENSG00000074603	2958.98	-0.00580946	0.143858	-0.0403832	0.967788	0.994445	DPP8
ENSG00000074621	429.58	0.337267	0.176256	1.91351	0.0556834	0.250515	SLC24A1
ENSG00000074657	3903.25	0.214704	0.10919	1.96634	0.0492594	0.230881	ZNF532
ENSG00000074660	2080.46	-0.258516	0.124931	-2.06927	0.0385207	0.195447	SCARF1
ENSG00000074695	8643.82	0.0548681	0.148113	0.370447	0.71105	0.918158	LMAN1
ENSG00000074696	2968.28	0.153469	0.0949776	1.61584	0.106128	0.379603	HACD3
ENSG00000074706	14.4804	0.0816586	1.11581	0.0731832	0.94166	0.988465	IPCEF1
ENSG00000074755	5113.17	-0.288762	0.0952117	-3.03284	0.00242261	0.0245666	ZZEF1
ENSG00000074800	29489.7	0.103542	0.108718	0.952397	0.340895	0.697393	ENO1
ENSG00000074842	2279.86	-0.01744	0.0980011	-0.177957	0.858756	0.966464	MYDGF
ENSG00000074855	231.929	-0.0517383	0.267709	-0.193263	0.846753	0.963072	ANO8
ENSG00000074935	474.03	-0.130691	0.1891	-0.691123	0.489489	0.806242	TUBE1
ENSG00000074964	34.4675	-0.195474	0.647856	-0.301725	0.762862	0.938786	ARHGEF10L
ENSG00000074966	12.9016	-0.0352045	0.934074	-0.0376892	0.969935	0.994877	TXK
ENSG00000075035	1.49909	-4.09389	3.93745	-1.03973	0.298464	NA	WSCD2
ENSG00000075073	7.07536	0.0276443	1.10252	0.0250736	0.979996	NA	TACR2
ENSG00000075089	551.527	-0.0773321	0.168414	-0.459179	0.646106	0.890516	ACTR6
ENSG00000075131	241.101	0.139492	0.217264	0.642043	0.520845	0.826955	TIPIN
ENSG00000075142	2246.62	-0.0428725	0.0965955	-0.443835	0.657162	0.895598	SRI
ENSG00000075151	5139.99	-0.0443542	0.0828888	-0.535105	0.592577	0.864455	EIF4G3
ENSG00000075188	654.528	0.0133511	0.13898	0.096065	0.923469	0.985916	NUP37
ENSG00000075213	269.394	1.60365	0.444701	3.60614	0.000310784	0.00453328	SEMA3A
ENSG00000075218	620.725	2.11097	0.264526	7.98021	1.46086e-15	2.289e-13	GTSE1
ENSG00000075223	543.751	-0.533817	0.336485	-1.58645	0.112636	0.392296	SEMA3C
ENSG00000075234	591.818	0.162746	0.159078	1.02306	0.306279	0.665259	TTC38
ENSG00000075239	1630.1	-0.176841	0.119135	-1.48437	0.13771	0.441475	ACAT1
ENSG00000075240	410.2	-0.129962	0.283158	-0.458973	0.646253	0.890516	GRAMD4
ENSG00000075275	41.3692	-0.293884	0.673266	-0.436505	0.66247	0.898885	CELSR1
ENSG00000075292	4438.31	0.135488	0.114016	1.18833	0.234705	0.586542	ZNF638
ENSG00000075303	684.075	0.211903	0.164735	1.28632	0.198331	0.53859	SLC25A40
ENSG00000075336	538.804	0.18868	0.14851	1.27048	0.203912	0.54722	TIMM21
ENSG00000075340	101.872	-0.79635	0.479804	-1.65974	0.0969669	0.359087	ADD2
ENSG00000075391	1571.88	-0.00860679	0.127234	-0.0676453	0.946068	0.989674	RASAL2
ENSG00000075399	572.257	-0.0730854	0.172169	-0.424499	0.671202	0.902916	VPS9D1
ENSG00000075407	1250.58	-0.0783604	0.127624	-0.613993	0.53922	0.836277	ZNF37A
ENSG00000075413	3215.03	-0.0194338	0.0927905	-0.209437	0.834107	0.958175	MARK3
ENSG00000075415	16329.8	0.197689	0.0784144	2.52108	0.0116995	0.0817704	SLC25A3
ENSG00000075420	12802.7	-0.0422118	0.163382	-0.258363	0.796127	0.946107	FNDC3B
ENSG00000075426	7394.08	-0.429156	0.225219	-1.9055	0.0567148	0.25359	FOSL2
ENSG00000075539	5944.88	-0.0504908	0.142014	-0.355534	0.72219	0.922812	FRYL
ENSG00000075568	3463.75	-0.23283	0.0974482	-2.38927	0.0168819	0.107355	TMEM131
ENSG00000075618	10560.1	0.121591	0.161692	0.751991	0.452057	0.78291	FSCN1
ENSG00000075624	520	0.289612	0.223412	1.29632	0.194867	0.533146	ACTB
ENSG00000075643	103.52	0.365823	0.380194	0.962201	0.335948	0.692957	MOCOS
ENSG00000075651	3630.81	0.290598	0.152277	1.90835	0.0563455	0.252558	PLD1
ENSG00000075702	238.787	-0.0904961	0.234507	-0.3859	0.699571	0.914027	WDR62
ENSG00000075711	1544.94	-0.0414652	0.198539	-0.208852	0.834564	0.958265	DLG1
ENSG00000075785	9767.57	-0.0839675	0.0683817	-1.22792	0.219476	0.568669	RAB7A
ENSG00000075790	6039.93	0.257989	0.0967024	2.66787	0.00763344	0.0591358	BCAP29
ENSG00000075826	605.841	0.0201093	0.130719	0.153836	0.877739	0.971369	SEC31B
ENSG00000075856	1651.49	0.070692	0.109878	0.643365	0.519987	0.826777	SART3
ENSG00000075884	5.88342	0.86041	1.31453	0.65454	0.512764	NA	ARHGAP15
ENSG00000075914	529.608	0.181277	0.144783	1.25206	0.210548	0.556829	EXOSC7
ENSG00000075945	1296.94	-0.225017	0.0999217	-2.25194	0.0243262	0.141422	KIFAP3
ENSG00000075975	1561.62	-0.0407969	0.107839	-0.378314	0.705198	0.915583	MKRN2
ENSG00000076003	1369.83	0.622942	0.113803	5.47389	4.40264e-08	1.89248e-06	MCM6
ENSG00000076043	2671.61	0.140131	0.124018	1.12993	0.258507	0.614213	REXO2
ENSG00000076053	1390.25	-0.103728	0.115014	-0.901873	0.367125	0.720989	RBM7
ENSG00000076067	5842.48	-0.0813766	0.0834714	-0.974904	0.329608	0.687131	RBMS2
ENSG00000076108	5291.99	0.0118206	0.11059	0.106886	0.914879	0.983347	BAZ2A
ENSG00000076201	2539.35	-0.0558395	0.100022	-0.55827	0.57666	0.855712	PTPN23
ENSG00000076242	1177.44	-0.0628986	0.107055	-0.587536	0.556844	0.845506	MLH1
ENSG00000076248	841.838	0.487689	0.147611	3.30389	0.000953541	0.0115985	UNG
ENSG00000076258	29.3837	0.692321	0.555683	1.24589	0.212805	0.559846	FMO4
ENSG00000076321	1433.96	-0.0443007	0.10159	-0.436072	0.662785	0.898929	KLHL20
ENSG00000076344	176.404	-0.734616	0.297146	-2.47224	0.013427	0.0909191	RGS11
ENSG00000076351	154.844	0.326388	0.277446	1.1764	0.239435	0.591363	SLC46A1
ENSG00000076356	14921.9	-0.160917	0.0795078	-2.02392	0.0429789	0.211027	PLXNA2
ENSG00000076382	704.771	0.628058	0.217157	2.89218	0.00382578	0.0347998	SPAG5
ENSG00000076513	2434.07	0.0154055	0.113766	0.135414	0.892284	0.9763	ANKRD13A
ENSG00000076554	140.82	1.47228	0.48617	3.02833	0.00245913	0.024885	TPD52
ENSG00000076555	99.3854	-0.184866	0.493878	-0.374315	0.70817	0.916946	ACACB
ENSG00000076604	584.394	0.230797	0.212454	1.08634	0.277329	0.635607	TRAF4
ENSG00000076641	46.5458	1.22445	0.904217	1.35415	0.175688	0.504258	PAG1
ENSG00000076650	349.543	0.00444066	0.180338	0.0246241	0.980355	0.996784	GPATCH1
ENSG00000076662	137.775	0.547262	0.238498	2.29462	0.0217552	0.130299	ICAM3
ENSG00000076685	2531.45	0.011949	0.134212	0.0890308	0.929057	0.986823	NT5C2
ENSG00000076706	51343.8	0.370909	0.124479	2.97968	0.00288547	0.0283718	MCAM
ENSG00000076716	1.74706	0.0305831	3.24107	0.00943611	0.992471	NA	GPC4
ENSG00000076770	215.913	0.407401	0.256453	1.5886	0.11215	0.391157	MBNL3
ENSG00000076826	1.14958	-3.78978	3.02009	-1.25486	0.209531	NA	CAMSAP3
ENSG00000076864	5.33263	-1.64092	1.81861	-0.902295	0.3669	NA	RAP1GAP
ENSG00000076924	1018.49	0.10764	0.112276	0.958705	0.337707	0.694969	XAB2
ENSG00000076928	2415.22	0.0530887	0.112656	0.471248	0.637464	0.887886	ARHGEF1
ENSG00000076944	1023.1	0.32197	0.116014	2.77526	0.00551581	0.0461138	STXBP2
ENSG00000076984	1100.94	-0.0474024	0.13187	-0.359463	0.719249	0.921604	MAP2K7
ENSG00000077044	789.148	-0.239917	0.19329	-1.24123	0.214521	0.562332	DGKD
ENSG00000077063	3.38165	3.04841	2.14742	1.41957	0.155733	NA	CTTNBP2
ENSG00000077092	366.945	0.153513	0.314972	0.487386	0.625985	0.88164	RARB
ENSG00000077097	6547.73	0.160807	0.078583	2.04633	0.0407239	0.202881	TOP2B
ENSG00000077147	11790.4	0.155203	0.129659	1.19701	0.231302	0.582231	TM9SF3
ENSG00000077150	320.618	-0.527062	0.449931	-1.17143	0.241426	0.593155	NFKB2
ENSG00000077152	9.2781	-2.2462	1.71754	-1.3078	0.190941	NA	UBE2T
ENSG00000077157	476.603	-0.625393	0.308443	-2.02758	0.042603	0.209804	PPP1R12B
ENSG00000077232	11257.7	0.0639016	0.130278	0.490503	0.623778	0.881163	DNAJC10
ENSG00000077235	4669.07	-0.247626	0.134971	-1.83466	0.0665563	0.282593	GTF3C1
ENSG00000077238	3562.08	-0.449862	0.142644	-3.15375	0.00161189	0.0175156	IL4R
ENSG00000077254	2837.53	0.0136428	0.117337	0.116271	0.907438	0.980294	USP33
ENSG00000077264	32.6599	-0.18773	0.533511	-0.351877	0.724931	0.924246	PAK3
ENSG00000077279	0.454899	-0.313552	4.00457	-0.0782987	0.93759	NA	DCX
ENSG00000077312	1188.19	0.25268	0.115893	2.18029	0.0292361	0.16223	SNRPA
ENSG00000077348	96.3761	0.25605	0.339821	0.753486	0.451158	0.782339	EXOSC5
ENSG00000077380	6561.43	-0.0897863	0.082009	-1.09483	0.273589	0.631513	DYNC1I2
ENSG00000077454	1170.74	0.21842	0.110296	1.98031	0.0476686	0.225602	LRCH4
ENSG00000077458	765.15	-0.165807	0.127498	-1.30046	0.193443	0.531097	FAM76B
ENSG00000077463	331.374	-0.440268	0.202999	-2.16882	0.0300965	0.164936	SIRT6
ENSG00000077514	767.933	0.231436	0.149551	1.54754	0.121734	0.410532	POLD3
ENSG00000077522	86.1132	0.202117	0.598176	0.337889	0.735447	0.928309	ACTN2
ENSG00000077549	7413.99	-0.021712	0.0803071	-0.270362	0.786882	0.943894	CAPZB
ENSG00000077585	377.188	0.109097	0.163712	0.666398	0.505157	0.815871	GPR137B
ENSG00000077616	9.76728	0.187249	0.931979	0.200916	0.840765	NA	NAALAD2
ENSG00000077684	1421.25	0.0850807	0.114408	0.743661	0.457082	0.785633	JADE1
ENSG00000077713	683.072	0.00349896	0.146849	0.0238268	0.980991	0.996886	SLC25A43
ENSG00000077721	3527.34	-0.309407	0.100938	-3.06533	0.00217431	0.0225349	UBE2A
ENSG00000077782	4349.56	-0.433595	0.126021	-3.44066	0.000580294	0.00777211	FGFR1
ENSG00000077935	0.444224	2.08435	4.02305	0.518103	0.604386	NA	SMC1B
ENSG00000077942	18.7574	0.0680005	0.648429	0.10487	0.916479	0.983934	FBLN1
ENSG00000077943	13.4171	-0.629233	0.839732	-0.749327	0.45366	0.783666	ITGA8
ENSG00000078018	5232.59	0.186256	0.218913	0.85082	0.394869	0.741935	MAP2
ENSG00000078043	1125.78	-0.197643	0.120729	-1.63708	0.101614	0.369808	PIAS2
ENSG00000078053	6.44581	1.09371	1.31377	0.832498	0.405128	NA	AMPH
ENSG00000078061	1560.41	-0.0892457	0.111812	-0.798178	0.424767	0.766053	ARAF
ENSG00000078070	796.533	0.190804	0.125471	1.52071	0.128334	0.423447	MCCC1
ENSG00000078081	299.362	0.473877	0.305417	1.55157	0.120764	0.4083	LAMP3
ENSG00000078098	39.3625	-0.287911	0.669086	-0.430305	0.666974	0.901348	FAP
ENSG00000078114	79.9073	0.145566	0.42224	0.344747	0.730285	0.927086	NEBL
ENSG00000078124	1764.63	-0.429809	0.11395	-3.77192	0.000161997	0.00259694	ACER3
ENSG00000078140	3674.47	-0.291043	0.104658	-2.7809	0.00542089	0.0454907	UBE2K
ENSG00000078142	938.284	-0.591159	0.133507	-4.42793	9.51415e-06	0.0002247	PIK3C3
ENSG00000078177	802.353	0.254442	0.174948	1.45438	0.14584	0.45556	N4BP2
ENSG00000078237	1633.55	0.0358589	0.122947	0.291663	0.770544	0.941102	TIGAR
ENSG00000078246	1608.96	-0.0827869	0.0991195	-0.835223	0.403592	0.749859	TULP3
ENSG00000078269	4334.85	-0.448658	0.16765	-2.67616	0.00744703	0.057868	SYNJ2
ENSG00000078295	25.5507	-0.0294851	0.652046	-0.0452193	0.963933	0.993239	ADCY2
ENSG00000078304	3414.03	-0.0290664	0.0742899	-0.391256	0.695608	0.912108	PPP2R5C
ENSG00000078319	254.101	0.087164	0.182574	0.477417	0.633066	0.885405	PMS2P1
ENSG00000078369	17842	0.0098234	0.0723565	0.135764	0.892008	0.976218	GNB1
ENSG00000078399	263.47	-0.497418	0.415154	-1.19815	0.230857	0.581993	HOXA9
ENSG00000078401	16709.4	1.36049	0.1853	7.34208	2.10295e-13	2.2368e-11	EDN1
ENSG00000078403	1303.14	0.237988	0.111877	2.12723	0.0334007	0.177411	MLLT10
ENSG00000078487	36.458	-0.00446967	0.629686	-0.00709825	0.994336	0.999963	ZCWPW1
ENSG00000078549	17.9376	0.677349	0.95779	0.7072	0.479442	0.80138	ADCYAP1R1
ENSG00000078589	5.65626	0.132697	1.08726	0.122047	0.902862	NA	P2RY10
ENSG00000078596	492.197	-0.0067188	0.204584	-0.0328412	0.973801	0.995589	ITM2A
ENSG00000078618	5794.94	-0.0975897	0.0799933	-1.21997	0.222475	0.572876	NRDC
ENSG00000078668	3505.49	-0.0780152	0.103337	-0.754957	0.450275	0.781865	VDAC3
ENSG00000078674	6581.1	0.0366747	0.0862244	0.42534	0.670589	0.902708	PCM1
ENSG00000078687	1423.44	0.0503673	0.157179	0.320445	0.748631	0.933116	TNRC6C
ENSG00000078699	966.854	-0.179679	0.124679	-1.44113	0.149547	0.461305	CBFA2T2
ENSG00000078725	2.41895	1.1018	1.8588	0.592746	0.553351	NA	BRINP1
ENSG00000078747	1194.13	0.190338	0.200652	0.948597	0.342826	0.698889	ITCH
ENSG00000078795	42.8975	0.0873781	0.443489	0.197024	0.843809	0.961494	PKD2L2
ENSG00000078804	2078.14	-0.160462	0.109898	-1.4601	0.144263	0.452768	TP53INP2
ENSG00000078808	2677.51	-0.005804	0.111595	-0.0520096	0.958521	0.992217	SDF4
ENSG00000078814	68.227	-0.284597	0.34098	-0.834645	0.403917	0.749885	MYH7B
ENSG00000078900	1.20855	2.07518	3.69446	0.561701	0.574319	NA	TP73
ENSG00000078902	1688.35	-0.0795491	0.112549	-0.706797	0.479692	0.801464	TOLLIP
ENSG00000078967	541.564	0.0291777	0.162726	0.179305	0.857698	0.966021	UBE2D4
ENSG00000079101	0.396715	-2.09666	4.01849	-0.521753	0.601842	NA	CLUL1
ENSG00000079102	1955.49	-0.0330353	0.161812	-0.204158	0.83823	0.959501	RUNX1T1
ENSG00000079134	952.913	0.00782716	0.132259	0.0591805	0.952808	0.990738	THOC1
ENSG00000079150	423.259	0.773734	0.173762	4.45283	8.47478e-06	0.000203635	FKBP7
ENSG00000079156	514.339	0.257978	0.311208	0.828957	0.407129	0.752602	OSBPL6
ENSG00000079215	1.96717	0.0496307	3.10173	0.016001	0.987234	NA	SLC1A3
ENSG00000079246	14064.1	0.186301	0.090467	2.05933	0.0394628	0.198499	XRCC5
ENSG00000079257	2710.25	1.53527	0.223334	6.87433	6.22817e-12	5.15664e-10	LXN
ENSG00000079263	4.40326	-0.575022	1.48898	-0.386185	0.69936	NA	SP140
ENSG00000079277	622.04	-0.270901	0.170697	-1.58703	0.112506	0.392118	MKNK1
ENSG00000079308	1528.94	-0.179947	0.288459	-0.623823	0.532744	0.831795	TNS1
ENSG00000079313	1071.33	-0.0769986	0.14377	-0.535566	0.592259	0.8643	REXO1
ENSG00000079332	4691.69	0.0296806	0.0839328	0.353624	0.723621	0.923726	SAR1A
ENSG00000079335	503.726	0.432204	0.2339	1.84782	0.0646283	0.277153	CDC14A
ENSG00000079337	881.986	0.0153798	0.119517	0.128683	0.897608	0.976918	RAPGEF3
ENSG00000079385	76.4163	-0.294532	0.358878	-0.820703	0.411815	0.756266	CEACAM1
ENSG00000079387	1035.42	0.0784458	0.132782	0.590785	0.554664	0.844282	SENP1
ENSG00000079432	3848.54	-0.228587	0.0879567	-2.59886	0.00935332	0.0691861	CIC
ENSG00000079435	79.5425	0.228524	0.617252	0.370228	0.711213	0.918206	LIPE
ENSG00000079459	2040.06	0.0949066	0.122181	0.776768	0.437296	0.773334	FDFT1
ENSG00000079462	224.403	0.445868	0.242736	1.83684	0.0662337	0.281469	PAFAH1B3
ENSG00000079482	1225	0.257901	0.221294	1.16542	0.243848	0.596166	OPHN1
ENSG00000079616	634.797	0.405388	0.245104	1.65394	0.0981387	0.362228	KIF22
ENSG00000079689	0.453889	-0.321758	4.00454	-0.0803483	0.93596	NA	SCGN
ENSG00000079691	412.671	-0.0716155	0.221635	-0.323123	0.746602	0.932261	CARMIL1
ENSG00000079739	620.22	0.530777	0.161722	3.28204	0.0010306	0.0123198	PGM1
ENSG00000079785	4978.45	-0.0429133	0.0757474	-0.566531	0.571033	0.852246	DDX1
ENSG00000079805	5216.96	-0.173796	0.0980636	-1.77227	0.076349	0.308872	DNM2
ENSG00000079819	3896.4	0.310146	0.0965653	3.21177	0.00131919	0.0149133	EPB41L2
ENSG00000079841	10.069	0.617361	1.39337	0.443071	0.657714	NA	RIMS1
ENSG00000079931	5.44779	1.5066	1.39705	1.07841	0.280849	NA	MOXD1
ENSG00000079950	3048.16	0.150903	0.0813306	1.85543	0.0635347	0.27359	STX7
ENSG00000079974	701.115	0.107259	0.135745	0.790151	0.42944	0.768677	RABL2B
ENSG00000079999	2275.49	-0.322416	0.126645	-2.54582	0.0109021	0.0777529	KEAP1
ENSG00000080007	31.0928	0.429435	0.519684	0.826339	0.408612	0.753478	DDX43
ENSG00000080031	22.1753	-0.839723	0.695305	-1.2077	0.227161	0.578704	PTPRH
ENSG00000080189	829.159	0.0565806	0.135495	0.417583	0.676252	0.903953	SLC35C2
ENSG00000080200	2327.73	0.0206987	0.11304	0.183109	0.854713	0.96514	CRYBG3
ENSG00000080224	0.279806	1.18276	4.08052	0.289855	0.771927	NA	EPHA6
ENSG00000080298	622.768	0.0400633	0.202903	0.197451	0.843475	0.961494	RFX3
ENSG00000080345	4319.96	0.204489	0.123416	1.6569	0.0975391	0.360746	RIF1
ENSG00000080371	2784.96	-0.151544	0.103354	-1.46627	0.142576	0.449797	RAB21
ENSG00000080493	5.03047	-0.962156	1.48784	-0.646679	0.51784	NA	SLC4A4
ENSG00000080503	4234.51	0.256296	0.0862156	2.97273	0.00295164	0.0289444	SMARCA2
ENSG00000080546	1085.03	-0.108502	0.126091	-0.860505	0.389511	0.738767	SESN1
ENSG00000080561	1288.95	0.31831	0.149636	2.12723	0.0334011	0.177411	MID2
ENSG00000080572	0.795331	-0.208295	3.91624	-0.0531876	0.957582	NA	DNAAF6
ENSG00000080573	18.634	-0.846323	0.828191	-1.02189	0.306831	0.665824	COL5A3
ENSG00000080603	5040.94	0.165077	0.106293	1.55304	0.120413	0.407869	SRCAP
ENSG00000080608	1402.76	0.0944744	0.142359	0.663637	0.506923	0.817585	PUM3
ENSG00000080618	0.568328	-1.95291	4.01435	-0.486483	0.626625	NA	CPB2
ENSG00000080709	64.7444	-0.249503	0.388069	-0.642934	0.520267	0.826828	KCNN2
ENSG00000080802	1135.84	-0.157321	0.116239	-1.35342	0.17592	0.504452	CNOT4
ENSG00000080815	2742.33	-0.186642	0.0935579	-1.99493	0.04605	0.220955	PSEN1
ENSG00000080819	19.5682	-0.195549	0.624073	-0.313343	0.75402	0.935112	CPOX
ENSG00000080822	2879.78	-0.168502	0.0915981	-1.83958	0.0658306	0.28041	CLDND1
ENSG00000080823	200.342	-0.275274	0.294002	-0.9363	0.349119	0.704621	MOK
ENSG00000080824	28237.7	-0.175912	0.0771603	-2.27983	0.0226178	0.134251	HSP90AA1
ENSG00000080839	587.822	0.268396	0.163086	1.64574	0.0998183	0.365596	RBL1
ENSG00000080845	4753.38	-0.288405	0.0990392	-2.91203	0.00359086	0.0332862	DLGAP4
ENSG00000080854	4.67183	-3.71122	1.70757	-2.17339	0.0297506	NA	IGSF9B
ENSG00000080947	168.773	-0.00873267	0.271284	-0.0321902	0.97432	0.995589	CROCCP3
ENSG00000080986	505.681	1.90265	0.347781	5.47084	4.47907e-08	1.90845e-06	NDC80
ENSG00000081014	1040.58	-0.0193717	0.146008	-0.132675	0.89445	0.976679	AP4E1
ENSG00000081019	732.041	0.147999	0.197907	0.74782	0.454568	0.783809	RSBN1
ENSG00000081026	899.041	-0.213071	0.139145	-1.53129	0.125698	0.419243	MAGI3
ENSG00000081041	1354.85	-1.68175	1.09784	-1.53187	0.125554	0.419145	CXCL2
ENSG00000081052	6.43842	-0.419513	1.43071	-0.29322	0.769354	NA	COL4A4
ENSG00000081059	27.7455	-0.523664	0.704924	-0.742866	0.457563	0.785996	TCF7
ENSG00000081087	1919.26	-0.202706	0.121698	-1.66565	0.0957823	0.35623	OSTM1
ENSG00000081138	11.8584	0.794674	0.821988	0.966771	0.333659	0.690926	CDH7
ENSG00000081148	89.5764	-0.808761	0.421423	-1.91912	0.0549695	0.248531	IMPG2
ENSG00000081154	4057.68	-0.126104	0.107829	-1.16947	0.242213	0.593996	PCNP
ENSG00000081177	1367.44	-0.183309	0.115466	-1.58756	0.112387	0.391795	EXD2
ENSG00000081181	535.282	0.373072	0.14297	2.60945	0.00906875	0.0674234	ARG2
ENSG00000081189	2668.36	-0.540608	0.133719	-4.04286	5.2804e-05	0.000999298	MEF2C
ENSG00000081277	2.04461	-0.445127	1.99762	-0.222828	0.823669	NA	PKP1
ENSG00000081307	1408.12	0.112641	0.151762	0.742225	0.457951	0.786477	UBA5
ENSG00000081320	1004.53	0.602377	0.264194	2.28006	0.0226042	0.134225	STK17B
ENSG00000081377	89.8359	-0.584242	0.347323	-1.68213	0.0925438	0.348913	CDC14B
ENSG00000081386	650.322	0.0496925	0.134993	0.368112	0.71279	0.918939	ZNF510
ENSG00000081479	1.16882	0	4.08052	0	1	NA	LRP2
ENSG00000081665	189.638	0.126095	0.280362	0.449757	0.652885	0.893268	ZNF506
ENSG00000081692	399.027	0.02783	0.179768	0.15481	0.876971	0.971369	JMJD4
ENSG00000081721	553.363	0.0471078	0.147956	0.31839	0.750189	0.933702	DUSP12
ENSG00000081760	983.246	0.236141	0.125069	1.88808	0.0590147	0.259807	AACS
ENSG00000081791	2210.19	-0.0177001	0.104386	-0.169564	0.865353	0.967606	DELE1
ENSG00000081800	29.0468	-0.0545065	0.541544	-0.10065	0.919828	0.984989	SLC13A1
ENSG00000081803	2856.77	-0.233302	0.12945	-1.80226	0.0715051	0.295894	CADPS2
ENSG00000081818	19.3094	0.18724	0.643048	0.291175	0.770917	0.941102	PCDHB4
ENSG00000081842	5.76212	-0.688199	1.23062	-0.559228	0.576006	NA	PCDHA6
ENSG00000081853	177.021	-0.00556038	0.219333	-0.0253513	0.979775	0.996784	PCDHGA2
ENSG00000081870	452.521	0.225577	0.158607	1.42224	0.154956	0.471009	IFT25
ENSG00000081913	590.476	-0.32185	0.164085	-1.96148	0.0498231	0.232491	PHLPP1
ENSG00000081923	26.7648	0.189979	0.835468	0.227392	0.820119	0.954152	ATP8B1
ENSG00000082014	104.712	-0.92919	0.374397	-2.48183	0.0130709	0.0890875	SMARCD3
ENSG00000082068	1020.49	-0.165223	0.184962	-0.893283	0.371706	0.724906	WDR70
ENSG00000082074	4.88553	-1.09459	1.51471	-0.722639	0.469902	NA	FYB1
ENSG00000082126	160.391	0.57584	0.365969	1.57346	0.115611	0.39846	MPP4
ENSG00000082146	625.998	0.420291	0.181133	2.32034	0.0203225	0.12396	STRADB
ENSG00000082153	15804.9	0.162079	0.0954562	1.69794	0.089519	0.34086	BZW1
ENSG00000082175	3.37085	2.10863	2.21691	0.951159	0.341524	NA	PGR
ENSG00000082196	39.3947	-0.206499	0.494176	-0.417865	0.676046	0.903953	C1QTNF3
ENSG00000082212	422.5	0.10214	0.461726	0.221215	0.824925	0.955367	ME2
ENSG00000082213	1186.49	-0.114231	0.128449	-0.889307	0.373838	0.727118	C5orf22
ENSG00000082258	1803.85	0.0736043	0.149129	0.493561	0.621616	0.87998	CCNT2
ENSG00000082269	815.844	-0.0366736	0.164558	-0.222861	0.823644	0.954861	FAM135A
ENSG00000082293	3.32233	-0.138124	1.45247	-0.0950963	0.924238	NA	COL19A1
ENSG00000082397	3877.98	-0.0407694	0.103321	-0.39459	0.693145	0.911299	EPB41L3
ENSG00000082438	1699.2	-0.397885	0.207866	-1.91414	0.0556023	0.250385	COBLL1
ENSG00000082458	145.878	-0.682989	0.478431	-1.42756	0.153418	0.468218	DLG3
ENSG00000082512	623.989	0.828567	0.20855	3.97298	7.09777e-05	0.00128378	TRAF5
ENSG00000082515	1001.06	0.234189	0.119311	1.96285	0.0496631	0.231952	MRPL22
ENSG00000082516	1270.84	0.156153	0.133567	1.1691	0.242362	0.594207	GEMIN5
ENSG00000082556	1.01831	-1.35435	2.47223	-0.547825	0.583812	NA	OPRK1
ENSG00000082641	16541.5	0.174966	0.12401	1.4109	0.158274	0.476522	NFE2L1
ENSG00000082684	9.23266	-4.22486	1.6923	-2.49652	0.0125419	NA	SEMA5B
ENSG00000082701	4136.12	-0.00881608	0.135699	-0.0649678	0.9482	0.989932	GSK3B
ENSG00000082781	4491.89	0.0318679	0.11852	0.268882	0.78802	0.944063	ITGB5
ENSG00000082805	4341.11	-0.0180783	0.0810995	-0.222915	0.823602	0.954861	ERC1
ENSG00000082898	9692.58	-0.224958	0.0670264	-3.35626	0.000790056	0.00995907	XPO1
ENSG00000082996	1850.45	-0.395185	0.105861	-3.73306	0.000189171	0.0029609	RNF13
ENSG00000083067	152.531	-0.269339	0.265357	-1.015	0.310103	0.669357	TRPM3
ENSG00000083093	651.836	0.425926	0.151728	2.80718	0.00499779	0.0428398	PALB2
ENSG00000083097	1395.23	0.035088	0.129228	0.271521	0.785991	0.943894	DOP1A
ENSG00000083099	1653.16	0.136351	0.121683	1.12054	0.262484	0.618318	LYRM2
ENSG00000083123	416.253	0.598403	0.157019	3.81101	0.000138399	0.00227624	BCKDHB
ENSG00000083168	3911.42	-0.120482	0.110535	-1.09	0.275715	0.633772	KAT6A
ENSG00000083223	1587.64	0.0680488	0.141841	0.479755	0.631401	0.883864	TUT7
ENSG00000083290	778.923	-0.310659	0.246649	-1.25952	0.207844	0.553592	ULK2
ENSG00000083307	1.32794	-0.702041	2.23561	-0.314026	0.753501	NA	GRHL2
ENSG00000083312	28227.1	0.0908352	0.167004	0.543911	0.586503	0.861806	TNPO1
ENSG00000083444	10798.1	0.174018	0.0997175	1.74511	0.0809664	0.320923	PLOD1
ENSG00000083454	2.86978	-0.864863	1.90325	-0.454413	0.649531	NA	P2RX5
ENSG00000083457	410.653	0.114109	0.198237	0.575618	0.564873	0.848836	ITGAE
ENSG00000083520	2879.51	0.17025	0.121201	1.40469	0.160112	0.479482	DIS3
ENSG00000083535	895.423	-0.257217	0.17718	-1.45173	0.146578	0.457035	PIBF1
ENSG00000083544	594.141	0.154169	0.13393	1.15111	0.249685	0.603685	TDRD3
ENSG00000083635	387.791	0.156166	0.179513	0.869939	0.384334	0.734108	NUFIP1
ENSG00000083642	2131.12	-0.124389	0.104569	-1.18954	0.234226	0.58645	PDS5B
ENSG00000083720	1549.52	0.230702	0.106341	2.16944	0.0300492	0.164863	OXCT1
ENSG00000083750	486.219	0.198196	0.166862	1.18778	0.234919	0.586773	RRAGB
ENSG00000083799	2468.07	-0.0056731	0.116424	-0.048728	0.961136	0.992395	CYLD
ENSG00000083807	138.991	-0.0970955	0.37997	-0.255535	0.79831	0.946854	SLC27A5
ENSG00000083812	331.295	-0.30197	0.253988	-1.18891	0.234474	0.586463	ZNF324
ENSG00000083814	90.9721	-0.546166	0.287949	-1.89675	0.057861	0.256885	ZNF671
ENSG00000083817	188.208	-0.0743003	0.218764	-0.339636	0.73413	0.927979	ZNF416
ENSG00000083828	199.49	-0.256717	0.237227	-1.08216	0.279181	0.636843	ZNF586
ENSG00000083838	173.972	0.160697	0.23249	0.6912	0.48944	0.806242	ZNF446
ENSG00000083844	1094.19	-0.385599	0.201051	-1.91792	0.0551216	0.248693	ZNF264
ENSG00000083845	9119.32	0.0923342	0.101454	0.91011	0.362765	0.716482	RPS5
ENSG00000083857	370.52	0.167182	0.501236	0.333539	0.738728	0.929357	FAT1
ENSG00000083937	1498.67	0.0968011	0.125213	0.773091	0.439468	0.775045	CHMP2B
ENSG00000084070	684.976	-0.231949	0.178495	-1.29946	0.193784	0.531494	SMAP2
ENSG00000084072	859.884	0.0165116	0.144998	0.113874	0.909338	0.980892	PPIE
ENSG00000084073	3668.46	-0.112852	0.0881499	-1.28023	0.200463	0.541712	ZMPSTE24
ENSG00000084090	8481.93	-0.0272154	0.0935063	-0.291054	0.77101	0.941102	STARD7
ENSG00000084092	1055.75	0.125843	0.108414	1.16076	0.245739	0.598913	NOA1
ENSG00000084093	2997	0.0774014	0.121441	0.637358	0.523891	0.828134	REST
ENSG00000084110	20.9744	-1.24148	1.19457	-1.03926	0.298682	0.657611	HAL
ENSG00000084112	6815.57	-0.877188	0.119548	-7.33755	2.17537e-13	2.28054e-11	SSH1
ENSG00000084207	7140.17	-0.329455	0.13177	-2.50023	0.0124112	0.0853902	GSTP1
ENSG00000084234	44886.2	0.0856429	0.0914647	0.936348	0.349094	0.704621	APLP2
ENSG00000084444	356.193	-0.0150436	0.178196	-0.0844217	0.932721	0.987515	FAM234B
ENSG00000084453	15.7256	0.286435	0.687832	0.416431	0.677095	0.904043	SLCO1A2
ENSG00000084463	3089.16	0.227476	0.124192	1.83165	0.0670038	0.2832	WBP11
ENSG00000084623	4878.71	-0.0795774	0.0920404	-0.864592	0.387263	0.736773	EIF3I
ENSG00000084628	5.9151	-0.832433	1.18814	-0.70062	0.48354	NA	NKAIN1
ENSG00000084636	31.1915	-0.213034	0.568563	-0.374689	0.707892	0.916925	COL16A1
ENSG00000084652	3847.84	0.0122948	0.0996701	0.123355	0.901826	0.978293	TXLNA
ENSG00000084674	114.501	-0.252665	0.505529	-0.499803	0.617214	0.879713	APOB
ENSG00000084676	1700.05	0.0755713	0.0917529	0.823639	0.410144	0.754529	NCOA1
ENSG00000084693	871.857	0.0487369	0.134967	0.361102	0.718023	0.921123	AGBL5
ENSG00000084710	36.0634	-0.463891	0.47351	-0.979686	0.327241	0.68431	EFR3B
ENSG00000084731	1606.45	0.0851727	0.141428	0.602232	0.547019	0.840237	KIF3C
ENSG00000084733	5349.42	-0.11474	0.0978472	-1.17264	0.24094	0.592959	RAB10
ENSG00000084734	240.53	-2.14206	0.238899	-8.96637	3.06444e-19	8.42548e-17	GCKR
ENSG00000084754	5427.35	-0.112365	0.0910239	-1.23446	0.217033	0.565076	HADHA
ENSG00000084764	275.547	-0.663604	0.198966	-3.33526	0.000852189	0.0106138	MAPRE3
ENSG00000084774	2308.44	0.278672	0.139086	2.00359	0.045114	0.217615	CAD
ENSG00000085063	25957.8	-1.01518	0.102668	-9.88804	4.69131e-23	1.95319e-20	CD59
ENSG00000085117	460.344	0.515914	0.172619	2.98874	0.00280131	0.0276189	CD82
ENSG00000085185	682.252	0.0326972	0.154605	0.211489	0.832506	0.957801	BCORL1
ENSG00000085224	7578.23	0.156732	0.132569	1.18227	0.237097	0.588577	ATRX
ENSG00000085231	71.9202	0.333798	2.95865	0.112821	0.910173	0.981284	AK6
ENSG00000085265	6.31229	0.0034842	1.0835	0.00321571	0.997434	NA	FCN1
ENSG00000085274	898.19	-0.175753	0.136464	-1.28791	0.197778	0.53779	MYNN
ENSG00000085276	5664.11	-0.151541	0.110459	-1.37192	0.170087	0.495108	MECOM
ENSG00000085365	2160.64	0.0620969	0.146296	0.424459	0.671231	0.902916	SCAMP1
ENSG00000085377	1435.36	-0.0662378	0.113095	-0.585681	0.55809	0.846337	PREP
ENSG00000085382	674.252	-0.19192	0.16721	-1.14778	0.251061	0.605806	HACE1
ENSG00000085415	1290.75	0.150252	0.136658	1.09948	0.27156	0.628955	SEH1L
ENSG00000085433	1240.71	-0.3369	0.114137	-2.95172	0.00316008	0.0303751	WDR47
ENSG00000085449	4901.24	0.0249696	0.0996434	0.250589	0.802132	0.948216	WDFY1
ENSG00000085465	75.9518	0.19623	0.410558	0.477959	0.63268	0.88512	OVGP1
ENSG00000085491	1986.44	-0.0300878	0.108044	-0.278476	0.780647	0.942759	SLC25A24
ENSG00000085511	881.288	0.188952	0.159588	1.184	0.236414	0.588135	MAP3K4
ENSG00000085514	25.7817	-0.768078	0.820231	-0.936416	0.349059	0.704621	PILRA
ENSG00000085563	1904.28	-0.841212	0.175373	-4.79671	1.61296e-06	4.7197e-05	ABCB1
ENSG00000085644	322.877	0.0765822	0.164552	0.465399	0.641646	0.889127	ZNF213
ENSG00000085662	8163.03	-0.631705	0.139549	-4.52676	5.98958e-06	0.000150224	AKR1B1
ENSG00000085719	4195.17	-0.0927296	0.131635	-0.704443	0.481157	0.802123	CPNE3
ENSG00000085733	9530.48	0.1396	0.0883168	1.58067	0.113953	0.395082	CTTN
ENSG00000085741	1.55194	-3.13876	2.78537	-1.12687	0.259796	NA	WNT11
ENSG00000085760	1170.55	0.0689723	0.104158	0.66219	0.50785	0.818265	MTIF2
ENSG00000085788	2534.11	0.330693	0.113641	2.90997	0.00361462	0.0334214	DDHD2
ENSG00000085831	22.9068	-1.51748	0.805973	-1.88279	0.0597287	0.261607	TTC39A
ENSG00000085832	2986.92	0.0534861	0.118997	0.449475	0.653089	0.893274	EPS15
ENSG00000085840	246.315	0.959587	0.283582	3.38381	0.000714871	0.00916998	ORC1
ENSG00000085871	1406.28	0.0643611	0.116781	0.551128	0.581546	0.858329	MGST2
ENSG00000085872	1544.43	0.0773554	0.133256	0.580503	0.561575	0.847384	CHERP
ENSG00000085978	1037.37	-0.197272	0.110093	-1.79187	0.0731543	0.300283	ATG16L1
ENSG00000085982	1605.44	0.0201073	0.164872	0.121957	0.902933	0.978723	USP40
ENSG00000085998	1957.03	-0.103829	0.0912952	-1.13729	0.255416	0.610551	POMGNT1
ENSG00000085999	127.28	0.0688198	0.474836	0.144934	0.884763	0.973934	RAD54L
ENSG00000086015	1845.92	0.0235183	0.141052	0.166735	0.867579	0.968045	MAST2
ENSG00000086061	7433.02	-0.361556	0.0923543	-3.91488	9.04503e-05	0.00158039	DNAJA1
ENSG00000086062	6659.2	-0.405888	0.124307	-3.2652	0.00109388	0.0128756	B4GALT1
ENSG00000086065	1797.43	-0.0482644	0.109339	-0.441422	0.658908	0.896362	CHMP5
ENSG00000086102	1873.3	0.0342744	0.0891086	0.384636	0.700507	0.914547	NFX1
ENSG00000086159	34.6901	-0.357681	0.513974	-0.695913	0.486483	0.804977	AQP6
ENSG00000086189	1062.19	0.11145	0.128079	0.870171	0.384207	0.734108	DIMT1
ENSG00000086200	3306.04	0.0492268	0.11075	0.444485	0.656692	0.895165	IPO11
ENSG00000086205	8.00781	0.920177	1.49414	0.615855	0.53799	NA	FOLH1
ENSG00000086232	3666.38	0.143712	0.0987145	1.45583	0.14544	0.454893	EIF2AK1
ENSG00000086289	17.0723	0.00975065	0.862149	0.0113097	0.990976	0.998354	EPDR1
ENSG00000086300	7.82171	0.195384	1.16529	0.16767	0.866843	NA	SNX10
ENSG00000086475	1866.15	0.103417	0.122202	0.846278	0.397398	0.744904	SEPHS1
ENSG00000086504	873.02	-0.0450887	0.151777	-0.297073	0.766411	0.940173	MRPL28
ENSG00000086506	0.558317	0.127159	4.01887	0.0316406	0.974759	NA	HBQ1
ENSG00000086544	825.528	0.289486	0.183762	1.57533	0.11518	0.397639	ITPKC
ENSG00000086589	2146.28	0.0626022	0.105751	0.591977	0.553866	0.843712	RBM22
ENSG00000086598	11031.9	-0.00705277	0.0901922	-0.0781971	0.937671	0.987857	TMED2
ENSG00000086619	315.463	-0.32136	0.288101	-1.11544	0.264661	0.620314	ERO1B
ENSG00000086666	2003.52	-0.0993659	0.122885	-0.80861	0.41874	0.761022	ZFAND6
ENSG00000086696	12.7816	-0.760054	0.982275	-0.773769	0.439068	0.775045	HSD17B2
ENSG00000086712	678.616	0.293885	0.148077	1.98468	0.0471804	0.224165	TXLNG
ENSG00000086717	0.861179	2.27799	3.96727	0.574195	0.565836	NA	PPEF1
ENSG00000086730	23.2771	0.554612	0.616266	0.899956	0.368143	0.722017	LAT2
ENSG00000086758	15439.2	0.0559995	0.0742382	0.754322	0.450656	0.782339	HUWE1
ENSG00000086827	1231.33	0.0348397	0.114087	0.305379	0.760078	0.937281	ZW10
ENSG00000086848	875.326	-0.22978	0.149702	-1.53491	0.124806	0.417221	ALG9
ENSG00000086991	1262.8	0.74712	0.19805	3.77239	0.000161694	0.00259494	NOX4
ENSG00000087008	749.782	0.0252478	0.119918	0.210542	0.833245	0.958103	ACOX3
ENSG00000087053	4792.18	-0.225004	0.0979459	-2.29723	0.0216058	0.129564	MTMR2
ENSG00000087074	3997.49	-0.434569	0.112091	-3.87694	0.000105779	0.00179482	PPP1R15A
ENSG00000087076	285.9	0.0711317	0.201753	0.352568	0.724413	0.924032	HSD17B14
ENSG00000087077	1723.53	0.230318	0.1003	2.2963	0.0216587	0.129827	TRIP6
ENSG00000087085	13.2161	-0.874009	0.826889	-1.05698	0.290519	0.648703	ACHE
ENSG00000087086	74415.4	-0.706432	0.124345	-5.68124	1.33718e-08	6.32642e-07	FTL
ENSG00000087087	2815.7	0.185285	0.0911966	2.03171	0.0421831	0.208088	SRRT
ENSG00000087088	2701.26	-0.0162481	0.106045	-0.15322	0.878225	0.971369	BAX
ENSG00000087095	1581.87	0.195998	0.125179	1.56574	0.117409	0.402468	NLK
ENSG00000087111	2060.03	0.0499593	0.103407	0.483133	0.629001	0.883622	PIGS
ENSG00000087116	1.12093	1.53458	3.5984	0.426461	0.669772	NA	ADAMTS2
ENSG00000087152	2627.79	0.104775	0.0941453	1.1129	0.26575	0.621191	ATXN7L3
ENSG00000087157	999.867	0.141766	0.126729	1.11865	0.263288	0.61901	PGS1
ENSG00000087191	3796.12	-0.0126665	0.0958799	-0.132107	0.894899	0.976679	PSMC5
ENSG00000087206	1528.33	0.159459	0.0973177	1.63854	0.101309	0.369275	UIMC1
ENSG00000087237	16.5421	0.358758	0.790351	0.453922	0.649885	0.892648	CETP
ENSG00000087245	33635.6	-0.0460263	0.1363	-0.337684	0.735601	0.928309	MMP2
ENSG00000087253	6414.14	-0.0515674	0.198286	-0.260066	0.794813	0.945631	LPCAT2
ENSG00000087258	0.325845	-0.830814	4.06727	-0.204268	0.838144	NA	GNAO1
ENSG00000087263	2168.28	-0.109356	0.136401	-0.801721	0.422714	0.765166	OGFOD1
ENSG00000087266	4043.15	-0.847765	0.112995	-7.5027	6.25189e-14	7.40162e-12	SH3BP2
ENSG00000087269	2507.95	0.10204	0.103	0.99068	0.321842	0.679076	NOP14
ENSG00000087274	11122	-0.107995	0.067151	-1.60824	0.107782	0.3827	ADD1
ENSG00000087299	427.562	-0.0232624	0.150235	-0.154839	0.876948	0.971369	L2HGDH
ENSG00000087301	434.673	0.088915	0.173417	0.512724	0.608144	0.873854	TXNDC16
ENSG00000087302	4089.93	0.0893217	0.0934688	0.955631	0.339259	0.696081	RTRAF
ENSG00000087303	6369.01	-0.473483	0.174737	-2.70969	0.00673456	0.0538026	NID2
ENSG00000087338	1023.09	0.230514	0.1562	1.47576	0.140007	0.445553	GMCL1
ENSG00000087365	6101.8	0.0605591	0.0987651	0.613163	0.539769	0.836277	SF3B2
ENSG00000087448	1676.41	0.0893154	0.107493	0.830893	0.406034	0.751521	KLHL42
ENSG00000087460	14814.4	0.222342	0.0981427	2.26549	0.0234824	0.137923	GNAS
ENSG00000087470	4077.43	0.17397	0.100654	1.7284	0.0839172	0.328721	DNM1L
ENSG00000087494	86.9702	-0.875749	0.358587	-2.44222	0.0145971	0.0961176	PTHLH
ENSG00000087502	1592.9	-0.090329	0.109568	-0.824408	0.409708	0.75402	ERGIC2
ENSG00000087586	705.066	0.781686	0.198907	3.92991	8.49782e-05	0.00150974	AURKA
ENSG00000087589	91.9037	-0.0487897	0.60154	-0.0811079	0.935356	0.98755	CASS4
ENSG00000087842	2817.97	-0.338543	0.104462	-3.24083	0.00119183	0.0137183	PIR
ENSG00000087884	404.526	0.153443	0.16194	0.947533	0.343367	0.699504	AAMDC
ENSG00000087903	272.349	0.571731	0.278518	2.05276	0.0400958	0.20092	RFX2
ENSG00000087995	602.37	0.233502	0.140247	1.66493	0.0959261	0.356391	METTL2A
ENSG00000088002	1.48929	-2.13809	2.52401	-0.847101	0.396939	NA	SULT2B1
ENSG00000088035	223.046	0.2394	0.366818	0.652638	0.51399	0.823025	ALG6
ENSG00000088038	1307.5	0.163066	0.108729	1.49975	0.133679	0.433749	CNOT3
ENSG00000088179	1068.76	-0.144056	0.182814	-0.787993	0.430701	0.769445	PTPN4
ENSG00000088205	2928.86	0.0893477	0.120996	0.738433	0.460251	0.788307	DDX18
ENSG00000088247	6364.81	0.152753	0.0954412	1.60049	0.10949	0.38613	KHSRP
ENSG00000088256	4777.17	-0.00955068	0.0967709	-0.0986937	0.921381	0.985438	GNA11
ENSG00000088280	386.77	-0.618323	0.220442	-2.80492	0.00503288	0.0430141	ASAP3
ENSG00000088298	1470.44	-0.161118	0.111307	-1.44751	0.147754	0.459174	EDEM2
ENSG00000088305	173.161	0.275088	0.253533	1.08502	0.277914	0.635714	DNMT3B
ENSG00000088320	3.80848	-2.26611	1.70118	-1.33208	0.182833	NA	REM1
ENSG00000088325	2474.14	0.906049	0.255537	3.54566	0.00039163	0.00554154	TPX2
ENSG00000088340	81.6251	-0.527013	0.459608	-1.14666	0.251522	0.606516	FER1L4
ENSG00000088356	382.272	-0.00508129	0.176451	-0.0287972	0.977026	0.996475	PDRG1
ENSG00000088367	868.764	-0.320949	0.171599	-1.87034	0.0614364	0.267152	EPB41L1
ENSG00000088386	29.8353	-0.722602	0.544889	-1.32614	0.184792	0.518243	SLC15A1
ENSG00000088387	12315	0.53702	0.120565	4.45418	8.42149e-06	0.00020284	DOCK9
ENSG00000088448	1743.81	0.285497	0.11854	2.40845	0.0160205	0.103297	ANKRD10
ENSG00000088451	321.545	0.298085	0.189703	1.57132	0.116108	0.3997	TGDS
ENSG00000088538	11.9997	0.851484	0.909195	0.936525	0.349003	0.704621	DOCK3
ENSG00000088543	50.5724	1.09044	0.440128	2.47756	0.0132286	0.0899099	C3orf18
ENSG00000088682	774.588	-0.177035	0.123154	-1.43751	0.150573	0.462607	COQ9
ENSG00000088726	0.880766	-0.668753	3.46848	-0.192809	0.847109	NA	TMEM40
ENSG00000088727	274.912	-0.233445	0.230545	-1.01258	0.311261	0.670564	KIF9
ENSG00000088756	628.753	0.852807	0.262157	3.25304	0.00114178	0.0132998	ARHGAP28
ENSG00000088766	909.147	0.0212842	0.12761	0.166791	0.867535	0.968045	CRLS1
ENSG00000088808	1363.85	-0.301763	0.17012	-1.77382	0.0760924	0.308158	PPP1R13B
ENSG00000088812	5029.16	-0.0233338	0.102241	-0.228223	0.819473	0.954152	ATRN
ENSG00000088826	342.898	0.0175536	0.169882	0.103328	0.917702	0.984406	SMOX
ENSG00000088827	0.483075	-2.77895	3.97465	-0.699168	0.484447	NA	SIGLEC1
ENSG00000088832	35649	0.0310523	0.100881	0.307811	0.758227	0.936402	FKBP1A
ENSG00000088833	2363.95	-0.0746915	0.0978616	-0.763236	0.445323	0.778163	NSFL1C
ENSG00000088836	180.744	0.381319	0.302059	1.2624	0.206805	0.551674	SLC4A11
ENSG00000088854	1495.19	0.173301	0.118064	1.46786	0.142142	0.449207	DNAAF9
ENSG00000088876	348.035	-0.140622	0.160902	-0.873956	0.382142	0.733136	ZNF343
ENSG00000088881	76.9262	-0.220479	0.351909	-0.626523	0.530972	0.830898	EBF4
ENSG00000088882	101.085	0.683564	0.35671	1.9163	0.0553268	0.24945	CPXM1
ENSG00000088888	7007.65	0.0400219	0.0892688	0.44833	0.653915	0.893804	MAVS
ENSG00000088899	220.366	0.600864	0.225372	2.6661	0.00767375	0.0593043	LZTS3
ENSG00000088930	4179.91	0.065024	0.0890857	0.729904	0.465449	0.791847	XRN2
ENSG00000088970	339.268	0.148838	0.192033	0.775063	0.438302	0.774362	KIZ
ENSG00000088986	5223.41	0.142898	0.0945354	1.51158	0.130641	0.427799	DYNLL1
ENSG00000088992	3.33157	0.376375	1.51903	0.247773	0.80431	NA	TESC
ENSG00000089006	2672.18	0.457664	0.112896	4.05387	5.03764e-05	0.000962103	SNX5
ENSG00000089009	28925.9	0.221848	0.064081	3.46199	0.000536204	0.00726167	RPL6
ENSG00000089022	1171.1	0.280868	0.121713	2.30762	0.0210205	0.126992	MAPKAPK5
ENSG00000089041	236.369	0.881349	0.24288	3.62874	0.000284802	0.00421334	P2RX7
ENSG00000089048	1061.99	0.164058	0.133542	1.22851	0.219255	0.568236	ESF1
ENSG00000089050	1445.1	0.167914	0.120356	1.39515	0.162972	0.485143	RBBP9
ENSG00000089053	5055.81	-0.012867	0.09091	-0.141536	0.887447	0.9748	ANAPC5
ENSG00000089057	2730.82	0.177702	0.157341	1.1294	0.258728	0.614312	SLC23A2
ENSG00000089060	1031.53	-0.487137	0.137731	-3.53688	0.00040488	0.00571143	SLC8B1
ENSG00000089063	3245.28	0.087643	0.0880228	0.995685	0.319403	0.678377	TMEM230
ENSG00000089091	75.4679	-0.271605	0.348121	-0.780203	0.435271	0.772237	DZANK1
ENSG00000089094	936.464	0.0824306	0.142788	0.577294	0.563741	0.848495	KDM2B
ENSG00000089101	0.641957	-0.770859	3.97365	-0.193993	0.846182	NA	CFAP61
ENSG00000089123	209.032	0.0373723	0.238928	0.156417	0.875705	0.971347	TASP1
ENSG00000089127	280.419	-0.346493	0.352929	-0.981763	0.326217	0.683189	OAS1
ENSG00000089154	4280.41	0.379472	0.105993	3.58015	0.000343402	0.00494472	GCN1
ENSG00000089157	44552.2	0.143182	0.0696913	2.05451	0.0399261	0.200372	RPLP0
ENSG00000089159	12679.3	-0.177088	0.0783429	-2.26042	0.0237953	0.139367	PXN
ENSG00000089163	20.5025	0.26008	0.630303	0.412627	0.67988	0.905264	SIRT4
ENSG00000089177	526.609	0.0084088	0.179717	0.0467891	0.962681	0.993006	KIF16B
ENSG00000089195	542.493	0.285893	0.15522	1.84185	0.0654968	0.27952	TRMT6
ENSG00000089199	12.9855	0.22605	0.759733	0.297539	0.766055	0.940173	CHGB
ENSG00000089220	4381.31	0.153183	0.116589	1.31387	0.188889	0.524184	PEBP1
ENSG00000089234	1024.79	-0.0658051	0.108518	-0.606398	0.54425	0.839006	BRAP
ENSG00000089248	2046.8	0.13059	0.0836857	1.56049	0.118645	0.404515	ERP29
ENSG00000089250	2.07184	0.25252	1.77996	0.141868	0.887184	NA	NOS1
ENSG00000089280	6690.07	0.29636	0.136008	2.17899	0.0293322	0.162459	FUS
ENSG00000089289	1821.54	0.198152	0.113072	1.75245	0.0796969	0.317636	IGBP1
ENSG00000089327	3958.56	-0.391324	0.0945737	-4.13777	3.50693e-05	0.000701964	FXYD5
ENSG00000089335	979.194	-0.192455	0.129397	-1.48733	0.136929	0.440275	ZNF302
ENSG00000089351	2520.72	-0.0775022	0.131491	-0.589411	0.555586	0.844631	GRAMD1A
ENSG00000089472	13.4772	-0.388979	0.90787	-0.428453	0.668322	0.901556	HEPH
ENSG00000089486	485.251	0.331379	0.272379	1.21661	0.223753	0.574744	CDIP1
ENSG00000089505	40.1944	0.384608	0.469174	0.819756	0.412355	0.756591	CMTM1
ENSG00000089558	1.21772	-1.72278	3.69814	-0.46585	0.641323	NA	KCNH4
ENSG00000089597	14667.1	0.116575	0.0846819	1.37662	0.168629	0.492703	GANAB
ENSG00000089639	511.16	-0.059941	0.167463	-0.357935	0.720392	0.922179	GMIP
ENSG00000089682	461.655	-0.103686	0.14837	-0.698832	0.484657	0.803977	RBM41
ENSG00000089685	804.65	1.06403	0.277486	3.83455	0.000125795	0.00209099	BIRC5
ENSG00000089692	18.2006	0.104619	0.800777	0.130647	0.896054	0.976679	LAG3
ENSG00000089693	3095.95	0.0480954	0.10253	0.469085	0.639009	0.888092	MLF2
ENSG00000089723	67.0137	-0.568042	0.424189	-1.33913	0.18053	0.511803	OTUB2
ENSG00000089737	1335.73	-0.128601	0.264296	-0.486579	0.626556	0.881802	DDX24
ENSG00000089775	439.552	-0.251061	0.152557	-1.64568	0.0998289	0.365596	ZBTB25
ENSG00000089818	768.468	0.06886	0.151813	0.453583	0.650129	0.892648	NECAP1
ENSG00000089820	351.701	-0.369042	0.211853	-1.74197	0.0815138	0.322164	ARHGAP4
ENSG00000089847	11.3334	-0.0515771	0.881868	-0.0584862	0.953361	0.990738	ANKRD24
ENSG00000089876	1469.16	0.0708086	0.119549	0.592296	0.553652	0.843712	DHX32
ENSG00000089902	2641.32	0.0925968	0.10798	0.857535	0.391149	0.739647	RCOR1
ENSG00000089916	2716.11	-0.0784051	0.120242	-0.652062	0.514361	0.823204	GPATCH2L
ENSG00000090006	876.729	-0.27913	0.144893	-1.92646	0.0540464	0.245883	LTBP4
ENSG00000090013	433.682	-0.399958	0.169462	-2.36016	0.0182669	0.114047	BLVRB
ENSG00000090020	3027.3	0.0955895	0.0961986	0.993668	0.320384	0.679076	SLC9A1
ENSG00000090054	3067.26	-0.167292	0.0835972	-2.00117	0.0453743	0.218649	SPTLC1
ENSG00000090060	8741.98	0.00448903	0.0901507	0.0497947	0.960286	0.992217	PAPOLA
ENSG00000090061	2540.7	0.1686	0.114389	1.47391	0.140505	0.446357	CCNK
ENSG00000090097	695.018	0.428699	0.147639	2.9037	0.00368778	0.0339257	PCBP4
ENSG00000090238	722.28	0.206556	0.210549	0.981031	0.326577	0.68361	YPEL3
ENSG00000090263	509.927	0.217077	0.145648	1.49042	0.136113	0.438621	MRPS33
ENSG00000090266	1004.56	-0.125277	0.12593	-0.99481	0.319829	0.678984	NDUFB2
ENSG00000090273	2849.14	0.0692872	0.103086	0.672132	0.5015	0.81432	NUDC
ENSG00000090316	1964.89	0.00901174	0.0942193	0.0956465	0.923801	0.985916	MAEA
ENSG00000090339	6574.77	-1.06261	0.745613	-1.42515	0.154113	0.469426	ICAM1
ENSG00000090372	2871.34	0.0404147	0.0886444	0.45592	0.648448	0.892105	STRN4
ENSG00000090376	1342.48	-0.16302	0.175944	-0.926542	0.354164	0.708134	IRAK3
ENSG00000090382	48.0044	-0.215241	0.447185	-0.481325	0.630286	0.883753	LYZ
ENSG00000090432	1047.09	-0.0236505	0.109775	-0.215445	0.829421	0.956726	MUL1
ENSG00000090447	185.509	0.220636	0.267632	0.824399	0.409713	0.75402	TFAP4
ENSG00000090470	865.016	-0.0385558	0.124863	-0.308784	0.757486	0.936112	PDCD7
ENSG00000090487	2535.11	-0.0204998	0.0970571	-0.211214	0.83272	0.957801	SPG21
ENSG00000090520	3133.16	-0.100908	0.107287	-0.940535	0.346943	0.703449	DNAJB11
ENSG00000090530	115.578	0.263691	0.664883	0.396598	0.691664	0.910801	P3H2
ENSG00000090539	12.6877	0.295681	0.790128	0.374219	0.708241	0.916946	CHRD
ENSG00000090554	78.7497	-0.385049	0.360034	-1.06948	0.284854	0.642439	FLT3LG
ENSG00000090565	1733.72	0.0377786	0.113524	0.332782	0.739299	0.929594	RAB11FIP3
ENSG00000090581	1191.14	-0.0676345	0.112857	-0.599295	0.548976	0.84143	GNPTG
ENSG00000090612	972.313	0.0378943	0.139801	0.271058	0.786346	0.943894	ZNF268
ENSG00000090615	5032.68	0.233444	0.157915	1.47828	0.139332	0.444176	GOLGA3
ENSG00000090621	6619.21	0.281918	0.102866	2.74062	0.00613228	0.0498102	PABPC4
ENSG00000090659	7.67669	-0.949516	1.05903	-0.896587	0.369939	NA	CD209
ENSG00000090661	26.4884	0.887744	0.592304	1.4988	0.133926	0.434455	CERS4
ENSG00000090674	708.339	-0.320177	0.126839	-2.52428	0.0115937	0.0812228	MCOLN1
ENSG00000090686	4789.9	0.0765828	0.138085	0.554608	0.579163	0.856721	USP48
ENSG00000090776	3563.59	-1.70468	0.190413	-8.95253	3.47433e-19	9.37554e-17	EFNB1
ENSG00000090857	5121.39	0.0105231	0.0850378	0.123746	0.901517	0.978293	PDPR
ENSG00000090861	4036.01	0.1159	0.0820176	1.41311	0.157623	0.475841	AARS1
ENSG00000090863	13375.8	-0.260995	0.0887446	-2.94097	0.00327188	0.0311824	GLG1
ENSG00000090889	761.338	2.18179	0.218227	9.9978	1.55823e-23	6.88077e-21	KIF4A
ENSG00000090905	4147.2	0.147262	0.104768	1.4056	0.159842	0.479206	TNRC6A
ENSG00000090924	1742.52	0.117423	0.246131	0.477078	0.633307	0.885572	PLEKHG2
ENSG00000090932	5.84439	-0.633643	1.31196	-0.482976	0.629113	NA	DLL3
ENSG00000090971	227.231	0.580622	0.228179	2.54459	0.0109406	0.0779591	NAT14
ENSG00000090975	1114.23	-0.146238	0.163264	-0.895716	0.370405	0.724011	PITPNM2
ENSG00000090989	2201.96	0.228836	0.130715	1.75065	0.0800061	0.318698	EXOC1
ENSG00000091009	1667.36	0.133482	0.11493	1.16142	0.245471	0.59876	RBM27
ENSG00000091039	3625.42	-0.498784	0.168004	-2.96888	0.0029889	0.029231	OSBPL8
ENSG00000091073	183.843	0.0775766	0.274787	0.282316	0.777702	0.942276	DTX2
ENSG00000091106	2.28909	-0.970755	2.38148	-0.407627	0.683547	NA	NLRC4
ENSG00000091127	1346.09	0.323411	0.180964	1.78716	0.0739116	0.302121	PUS7
ENSG00000091128	35.9241	-0.534405	0.590023	-0.905737	0.365075	0.718707	LAMB4
ENSG00000091129	11839.2	-0.656768	0.207672	-3.16252	0.0015641	0.0170472	NRCAM
ENSG00000091136	44068.4	0.217637	0.0794326	2.7399	0.00614582	0.0498884	LAMB1
ENSG00000091137	4.3066	2.37746	1.70095	1.39772	0.162196	NA	SLC26A4
ENSG00000091140	3104.99	-0.0126198	0.108492	-0.11632	0.907399	0.980294	DLD
ENSG00000091157	1209.63	-0.223597	0.133196	-1.67871	0.0932095	0.349703	WDR7
ENSG00000091164	2607.53	0.03816	0.0814553	0.468478	0.639443	0.888429	TXNL1
ENSG00000091262	7.99673	-1.1428	1.36847	-0.835093	0.403666	NA	ABCC6
ENSG00000091317	6679.2	-0.0503881	0.0756249	-0.66629	0.505226	0.815871	CMTM6
ENSG00000091409	12347.3	-0.240494	0.11343	-2.1202	0.0339893	0.179129	ITGA6
ENSG00000091428	684.767	-0.966295	0.222158	-4.34958	1.36401e-05	0.0003091	RAPGEF4
ENSG00000091436	2207.8	-0.032194	0.0985296	-0.326744	0.743861	0.931156	MAP3K20
ENSG00000091483	2235.19	0.00754964	0.104307	0.0723792	0.9423	0.988467	FH
ENSG00000091490	11858.2	-0.0536642	0.0715992	-0.749508	0.453551	0.783666	SEL1L3
ENSG00000091513	168.709	-0.717363	0.341807	-2.09874	0.0358398	0.185791	TF
ENSG00000091527	12409.3	0.0463854	0.112561	0.412092	0.680272	0.905538	CDV3
ENSG00000091536	5.39126	-2.84684	1.66594	-1.70885	0.0874792	NA	MYO15A
ENSG00000091542	2425.08	-0.115747	0.0957362	-1.20902	0.226656	0.57813	ALKBH5
ENSG00000091592	3108.1	-0.0458823	0.109214	-0.420114	0.674402	0.903227	NLRP1
ENSG00000091622	485.361	-0.375585	0.288476	-1.30196	0.192929	0.530244	PITPNM3
ENSG00000091640	1278.04	-0.0679622	0.106922	-0.635621	0.525023	0.828211	SPAG7
ENSG00000091651	492.719	0.236774	0.220185	1.07534	0.282223	0.639887	ORC6
ENSG00000091656	35.1976	0.0288842	1.1275	0.0256179	0.979562	0.996784	ZFHX4
ENSG00000091664	1.63068	0.045275	3.74792	0.01208	0.990362	NA	SLC17A6
ENSG00000091732	567.961	-0.0928187	0.154288	-0.601596	0.547443	0.840339	ZC3HC1
ENSG00000091831	0.887425	0.0334166	3.99638	0.00836172	0.993328	NA	ESR1
ENSG00000091844	148.928	-0.0298875	0.312419	-0.0956647	0.923787	0.985916	RGS17
ENSG00000091879	5101.73	2.08578	0.519409	4.01567	5.92775e-05	0.00109966	ANGPT2
ENSG00000091947	451.704	0.0316661	0.179983	0.175939	0.860342	0.9666	TMEM101
ENSG00000091972	552.331	-0.251955	0.237877	-1.05918	0.289518	0.64766	CD200
ENSG00000091986	2768.77	0.395746	0.159363	2.4833	0.013017	0.0888452	CCDC80
ENSG00000092010	1842.84	-0.0855649	0.135717	-0.630466	0.52839	0.829559	PSME1
ENSG00000092020	1279.71	0.00888565	0.105065	0.0845732	0.932601	0.987515	PPP2R3C
ENSG00000092036	703.382	0.181064	0.135152	1.3397	0.180341	0.51157	HAUS4
ENSG00000092051	27.8931	-4.42859	0.834537	-5.30665	1.1166e-07	4.24834e-06	JPH4
ENSG00000092068	101.335	0.18407	0.321012	0.573405	0.56637	0.849614	SLC7A8
ENSG00000092094	744.177	0.0582072	0.166077	0.350483	0.725976	0.924569	OSGEP
ENSG00000092096	15.8418	0.77331	0.732388	1.05587	0.291025	0.649283	SLC22A17
ENSG00000092098	966.13	0.0368485	0.125483	0.293653	0.769023	0.940987	RNF31
ENSG00000092108	1793.51	0.0139064	0.10535	0.132002	0.894983	0.976679	SCFD1
ENSG00000092140	523.458	-0.0222911	0.201902	-0.110406	0.912088	0.98205	G2E3
ENSG00000092148	10967.2	0.115511	0.0909566	1.26996	0.2041	0.54722	HECTD1
ENSG00000092199	12345.7	0.076855	0.0897445	0.856375	0.39179	0.739757	HNRNPC
ENSG00000092201	5535.92	0.20508	0.0786449	2.60768	0.00911593	0.0676705	SUPT16H
ENSG00000092203	2958.75	0.112236	0.0957416	1.17228	0.241083	0.592959	TOX4
ENSG00000092208	223.69	0.144012	0.207307	0.69468	0.487256	0.805371	GEMIN2
ENSG00000092295	19.3652	0.288332	0.69628	0.414104	0.678798	0.904675	TGM1
ENSG00000092330	1478.68	0.116634	0.108585	1.07413	0.282765	0.640659	TINF2
ENSG00000092421	96.8403	0.441114	0.377014	1.17002	0.241992	0.593855	SEMA6A
ENSG00000092439	1626.98	-0.15521	0.158019	-0.982224	0.32599	0.682938	TRPM7
ENSG00000092445	662.964	-0.949922	0.201548	-4.71312	2.43947e-06	6.84933e-05	TYRO3
ENSG00000092470	467.735	0.284796	0.253243	1.1246	0.26076	0.615851	WDR76
ENSG00000092529	65.1621	-0.143596	0.382966	-0.374958	0.707691	0.916746	CAPN3
ENSG00000092531	5971.76	0.189452	0.104035	1.82104	0.068601	0.287753	SNAP23
ENSG00000092607	0.743373	-1.29886	4.04853	-0.320823	0.748344	NA	TBX15
ENSG00000092621	109.671	0.602395	0.419708	1.43527	0.15121	0.46427	PHGDH
ENSG00000092758	3.11023	0.80551	2.26862	0.355066	0.72254	NA	COL9A3
ENSG00000092820	3537.78	0.140243	0.121101	1.15807	0.246835	0.600501	EZR
ENSG00000092841	32862.9	-0.16703	0.108727	-1.53623	0.124481	0.416424	MYL6
ENSG00000092847	2249.5	0.107041	0.0866845	1.23483	0.216892	0.565076	AGO1
ENSG00000092850	1.33989	1.14003	3.13289	0.363891	0.715939	NA	TEKT2
ENSG00000092853	880.168	1.42058	0.298057	4.76614	1.87793e-06	5.39748e-05	CLSPN
ENSG00000092871	779.16	-0.0806869	0.142494	-0.566249	0.571225	0.852246	RFFL
ENSG00000092929	144.997	-0.39776	0.34384	-1.15682	0.247348	0.601126	UNC13D
ENSG00000092931	1209.05	-0.281497	0.112079	-2.51158	0.0120191	0.0834805	MFSD11
ENSG00000092964	10308.2	0.150412	0.103101	1.45888	0.144597	0.45362	DPYSL2
ENSG00000092969	542.852	0.470699	0.658341	0.714978	0.474623	0.797809	TGFB2
ENSG00000092978	707.986	-0.38651	0.142842	-2.70585	0.00681293	0.0543096	GPATCH2
ENSG00000093000	3861.48	0.236961	0.0798664	2.96697	0.00300751	0.0293343	NUP50
ENSG00000093009	338.175	1.08393	0.25195	4.30217	1.69131e-05	0.000370057	CDC45
ENSG00000093010	2608.97	0.122086	0.129598	0.94204	0.346172	0.70237	COMT
ENSG00000093072	655.015	0.0812317	0.222344	0.365342	0.714856	0.919308	ADA2
ENSG00000093134	1.52124	1.47789	2.36229	0.625618	0.531566	NA	VNN3P
ENSG00000093144	1699.06	0.106644	0.0972216	1.09691	0.272679	0.629707	ECHDC1
ENSG00000093167	3319.2	-0.252472	0.126313	-1.99879	0.0456314	0.219525	LRRFIP2
ENSG00000093183	2524.48	-0.133038	0.0936298	-1.42089	0.155348	0.471416	SEC22C
ENSG00000093217	131.056	0.215881	0.337603	0.639453	0.522528	0.827677	XYLB
ENSG00000094631	353.675	0.105965	0.166591	0.636079	0.524725	0.828134	HDAC6
ENSG00000094755	84.1253	0.0394177	0.381892	0.103217	0.917791	0.984406	GABRP
ENSG00000094804	332.85	0.257893	0.389845	0.661528	0.508274	0.818677	CDC6
ENSG00000094841	363.323	0.0870848	0.185566	0.469292	0.638861	0.888092	UPRT
ENSG00000094880	1521.7	0.0601651	0.108796	0.553008	0.580258	0.857557	CDC23
ENSG00000094914	919.396	0.143553	0.142773	1.00546	0.314675	0.673835	AAAS
ENSG00000094916	8285.73	0.357171	0.0880371	4.05706	4.96949e-05	0.000951582	CBX5
ENSG00000094963	6.42522	3.78603	2.00202	1.89111	0.0586095	NA	FMO2
ENSG00000094975	2209.81	0.0629967	0.153443	0.410553	0.6814	0.905997	SUCO
ENSG00000095002	1383.24	0.285871	0.0972362	2.93996	0.00328256	0.0312433	MSH2
ENSG00000095015	661.365	0.247542	0.151111	1.63815	0.101391	0.369275	MAP3K1
ENSG00000095059	653.437	-0.0214653	0.120971	-0.177442	0.859161	0.966464	DHPS
ENSG00000095066	357.038	0.126357	0.167869	0.752711	0.451624	0.782621	HOOK2
ENSG00000095139	10810.7	0.115269	0.0835282	1.38	0.167587	0.490976	ARCN1
ENSG00000095203	34.2217	1.07437	0.664079	1.61783	0.105698	0.378436	EPB41L4B
ENSG00000095209	226.114	0.203032	0.283248	0.716799	0.473498	0.797371	TMEM38B
ENSG00000095261	2490.68	-0.0901454	0.0967327	-0.931902	0.351387	0.706058	PSMD5
ENSG00000095303	5162.88	-0.392158	0.134791	-2.90937	0.0036216	0.0334648	PTGS1
ENSG00000095319	3607.27	0.0829389	0.140798	0.589063	0.555819	0.844743	NUP188
ENSG00000095321	1316.59	-0.0945114	0.129679	-0.728813	0.466116	0.791914	CRAT
ENSG00000095370	1713.2	-0.426203	0.105599	-4.03606	5.43569e-05	0.00102073	SH2D3C
ENSG00000095380	1595.46	0.0673961	0.166368	0.405102	0.685403	0.907642	NANS
ENSG00000095383	402.3	-1.38547	0.23619	-5.86589	4.46725e-09	2.3084e-07	TBC1D2
ENSG00000095397	30.364	0.0965616	0.584784	0.165124	0.868847	0.968235	WHRN
ENSG00000095485	926.019	0.212074	0.175546	1.20809	0.227014	0.578631	CWF19L1
ENSG00000095539	132.423	0.284099	0.462353	0.614463	0.53891	0.836136	SEMA4G
ENSG00000095564	2193.76	0.145168	0.156598	0.92701	0.353921	0.707843	BTAF1
ENSG00000095574	885.388	0.139433	0.167083	0.834516	0.40399	0.749885	IKZF5
ENSG00000095587	17.9782	-0.146214	0.753982	-0.193922	0.846237	0.962786	TLL2
ENSG00000095596	24.6889	0.507579	0.921953	0.550548	0.581944	0.858635	CYP26A1
ENSG00000095637	118.816	-0.605207	0.567259	-1.0669	0.286019	0.643885	SORBS1
ENSG00000095713	163.378	-0.854482	0.388418	-2.1999	0.0278139	0.156548	CRTAC1
ENSG00000095739	118.451	0.361745	0.372233	0.971824	0.331138	0.68785	BAMBI
ENSG00000095752	13.8343	-0.034063	0.829561	-0.0410615	0.967247	0.994293	IL11
ENSG00000095787	5777.68	0.0436854	0.0801918	0.544761	0.585918	0.861773	WAC
ENSG00000095794	700.013	0.242751	0.188902	1.28507	0.198769	0.539278	CREM
ENSG00000095906	569.186	0.0546487	0.17232	0.317136	0.751141	0.933847	NUBP2
ENSG00000095951	2168.97	0.867198	0.227889	3.80536	0.0001416	0.00232364	HIVEP1
ENSG00000096060	4910.12	0.0607972	0.146611	0.414683	0.678374	0.904651	FKBP5
ENSG00000096063	3609.26	-0.00987077	0.114489	-0.0862162	0.931295	0.986969	SRPK1
ENSG00000096070	2102.44	0.0018501	0.134406	0.013765	0.989017	0.998354	BRPF3
ENSG00000096080	572.285	-0.174908	0.139008	-1.25826	0.208297	0.554075	MRPS18A
ENSG00000096092	281.281	-0.0587219	0.251934	-0.233084	0.815696	0.953346	TMEM14A
ENSG00000096093	776.826	-0.0390851	0.163501	-0.239051	0.811066	0.952519	EFHC1
ENSG00000096155	518.663	0.047317	3.95102	0.0119759	0.990445	0.998354	BAG6
ENSG00000096171	7.051	1.03601	2.79997	0.370007	0.711377	NA	VARS1
ENSG00000096384	39966	0.013884	0.0784926	0.176883	0.8596	0.966464	HSP90AB1
ENSG00000096401	2362.25	0.119752	0.0907419	1.3197	0.186935	0.521363	CDC5L
ENSG00000096433	7554.56	-0.601917	0.078567	-7.6612	1.842e-14	2.45871e-12	ITPR3
ENSG00000096654	379.646	0.252022	0.182338	1.38217	0.16692	0.490001	ZNF184
ENSG00000096696	8.4367	-0.330391	1.20214	-0.274836	0.783442	NA	DSP
ENSG00000096717	724.295	-0.0779319	0.149491	-0.521314	0.602148	0.869794	SIRT1
ENSG00000096746	2999.26	0.221573	0.11249	1.96972	0.0488707	0.229724	HNRNPH3
ENSG00000096872	399.174	-0.326852	0.157332	-2.07747	0.0377583	0.192517	IFT74
ENSG00000096968	858.91	-0.24449	0.1699	-1.43902	0.150143	0.462178	JAK2
ENSG00000096996	15.3965	-0.519332	0.68257	-0.760849	0.446747	0.778834	IL12RB1
ENSG00000097007	4205.36	0.223881	0.112001	1.99892	0.0456167	0.219525	ABL1
ENSG00000097021	1406.7	-0.465433	0.12463	-3.73452	0.000188074	0.00295007	ACOT7
ENSG00000097033	11266.9	0.0126585	0.0764005	0.165686	0.868404	0.968127	SH3GLB1
ENSG00000097046	252.461	0.311528	0.276655	1.12605	0.260142	0.615489	CDC7
ENSG00000097096	109.958	1.15818	0.337148	3.43522	0.000592066	0.00789349	SYDE2
ENSG00000099139	496.939	-0.385748	0.203948	-1.8914	0.0585706	0.258745	PCSK5
ENSG00000099194	15035.3	0.0288838	0.139633	0.206855	0.836123	0.958359	SCD
ENSG00000099203	459.538	0.0674101	0.150699	0.447316	0.654647	0.894301	TMED1
ENSG00000099204	9353.7	0.377319	0.147753	2.55372	0.0106579	0.0762806	ABLIM1
ENSG00000099219	1170.11	0.037717	0.132326	0.285032	0.77562	0.941861	ERMP1
ENSG00000099246	3803.58	-0.170054	0.100232	-1.6966	0.0897729	0.341559	RAB18
ENSG00000099250	19680.3	0.278297	0.0912979	3.04823	0.00230196	0.0235742	NRP1
ENSG00000099251	40.4434	-0.0620134	0.44845	-0.138284	0.890016	0.97543	HSD17B7P2
ENSG00000099256	414.981	0.46883	0.165877	2.82638	0.00470777	0.0409318	PRTFDC1
ENSG00000099260	8105.16	0.569427	0.139979	4.06795	4.74278e-05	0.000911765	PALMD
ENSG00000099282	1430.78	0.819185	0.130417	6.28127	3.35826e-10	2.13697e-08	TSPAN15
ENSG00000099284	1.14419	-0.910271	3.54521	-0.256761	0.797363	NA	MACROH2A2
ENSG00000099290	3730.33	0.0767652	0.099312	0.772971	0.43954	0.775045	WASHC2A
ENSG00000099308	81.4274	0.160024	0.394703	0.405429	0.685162	0.907642	MAST3
ENSG00000099326	498.342	-0.110572	0.148741	-0.743383	0.45725	0.785829	MZF1
ENSG00000099330	131.641	0.129089	0.284821	0.453228	0.650385	0.892666	OCEL1
ENSG00000099331	6080.95	0.0359309	0.0812278	0.442348	0.658238	0.896099	MYO9B
ENSG00000099337	1359.03	0.171245	0.167929	1.01974	0.30785	0.666467	KCNK6
ENSG00000099338	41.3155	0.00634263	0.55251	0.0114797	0.990841	0.998354	CATSPERG
ENSG00000099341	3458.15	-0.0123156	0.107416	-0.114654	0.90872	0.980517	PSMD8
ENSG00000099364	787.108	0.187111	0.156811	1.19322	0.232781	0.58444	FBXL19
ENSG00000099365	8.7053	-0.0794688	1.22203	-0.06503	0.94815	NA	STX1B
ENSG00000099377	127.405	0.246274	0.255546	0.963718	0.335187	0.692226	HSD3B7
ENSG00000099381	1329.16	0.0297442	0.120147	0.247565	0.804471	0.949057	SETD1A
ENSG00000099385	807.554	0.221403	0.131369	1.68535	0.0919208	0.347103	BCL7C
ENSG00000099617	0.877682	0.0458216	3.96344	0.0115611	0.990776	NA	EFNA2
ENSG00000099622	4289.58	0.409901	0.0833072	4.92035	8.63879e-07	2.70719e-05	CIRBP
ENSG00000099624	756.694	0.294149	0.122341	2.40433	0.0162022	0.104059	ATP5F1D
ENSG00000099625	92.0273	0.56033	0.476241	1.17657	0.239368	0.591298	CBARP
ENSG00000099715	66.8777	0.134636	0.353971	0.380358	0.70368	0.915489	PCDH11Y
ENSG00000099725	1125.5	-0.549039	0.254938	-2.15362	0.0312702	0.169899	PRKY
ENSG00000099783	5757.71	0.106021	0.121226	0.874575	0.381805	0.733043	HNRNPM
ENSG00000099785	890.265	-0.231427	0.11957	-1.93549	0.0529306	0.242244	MARCHF2
ENSG00000099795	511.491	-0.0548459	0.159736	-0.343353	0.731333	0.927284	NDUFB7
ENSG00000099797	894.496	-0.144805	0.180693	-0.801383	0.42291	0.765166	TECR
ENSG00000099800	830.394	-0.0196561	0.118279	-0.166184	0.868012	0.968127	TIMM13
ENSG00000099804	1248.33	-0.183836	0.109041	-1.68594	0.0918082	0.347023	CDC34
ENSG00000099810	762.252	0.0452296	0.171482	0.263758	0.791966	0.944784	MTAP
ENSG00000099812	0.385111	0	4.08052	0	1	NA	MISP
ENSG00000099814	2493.48	-0.0687761	0.08851	-0.777044	0.437133	0.773299	CEP170B
ENSG00000099817	2833.91	0.0322915	0.111236	0.290298	0.771589	0.941102	POLR2E
ENSG00000099821	708.142	0.0808989	0.132392	0.611055	0.541163	0.837137	POLRMT
ENSG00000099822	45.7835	-0.83213	0.398049	-2.09052	0.036571	0.188441	HCN2
ENSG00000099840	14.2859	1.12923	0.798331	1.41449	0.157219	0.475113	IZUMO4
ENSG00000099849	108.281	0.0899629	0.318151	0.282768	0.777354	0.94224	RASSF7
ENSG00000099860	869.815	1.22298	0.216688	5.64398	1.66164e-08	7.78568e-07	GADD45B
ENSG00000099864	746.861	-1.0379	0.181067	-5.73216	9.9159e-09	4.80048e-07	PALM
ENSG00000099866	2.12861	-2.97929	2.816	-1.05799	0.290062	NA	MADCAM1
ENSG00000099875	3233.51	-0.50262	0.134062	-3.74917	0.000177422	0.00280411	MKNK2
ENSG00000099889	1069.19	0.650631	0.151191	4.30337	1.68218e-05	0.000369169	ARVCF
ENSG00000099899	821.633	-0.173353	0.132667	-1.30668	0.191322	0.527519	TRMT2A
ENSG00000099901	2199.8	0.335327	0.134231	2.49813	0.0124849	0.0856142	RANBP1
ENSG00000099904	1530.52	0.0786154	0.120659	0.651551	0.514691	0.823282	ZDHHC8
ENSG00000099910	453.588	0.0191778	0.174199	0.110092	0.912337	0.982063	KLHL22
ENSG00000099917	2542.39	-0.135513	0.104402	-1.29799	0.194292	0.532243	MED15
ENSG00000099937	104.656	-0.577726	0.482297	-1.19786	0.230971	0.581993	SERPIND1
ENSG00000099940	1975.38	0.0799509	0.146495	0.545758	0.585232	0.861327	SNAP29
ENSG00000099942	3279.8	0.069871	0.0819401	0.852709	0.393821	0.741346	CRKL
ENSG00000099949	255.757	0.254485	0.229653	1.10813	0.267807	0.623898	LZTR1
ENSG00000099953	111.445	0.566554	0.807937	0.701235	0.483157	0.80292	MMP11
ENSG00000099954	423.615	-0.392528	0.24396	-1.60898	0.10762	0.382342	CECR2
ENSG00000099956	152.925	3.54992	0.730332	4.86069	1.16978e-06	3.54387e-05	SMARCB1
ENSG00000099957	4.08123	1.54027	1.45365	1.05959	0.289331	NA	P2RX6
ENSG00000099968	2409.51	-0.300278	0.0834509	-3.59826	0.000320349	0.00464952	BCL2L13
ENSG00000099977	21.6177	4.82201	3.78507	1.27395	0.20268	0.545119	DDT
ENSG00000099984	0.461324	1.7315	4.0315	0.429492	0.667565	NA	GSTT2
ENSG00000099991	2084.25	-0.0591704	0.154508	-0.382961	0.701749	0.915214	CABIN1
ENSG00000099992	265.381	-0.0482888	0.20994	-0.230012	0.818083	0.953925	TBC1D10A
ENSG00000099994	7.50996	0.0384379	1.04349	0.0368361	0.970616	NA	SUSD2
ENSG00000099995	4026.65	0.203557	0.135667	1.50042	0.133507	0.433384	SF3A1
ENSG00000099998	448.238	-0.659589	0.313991	-2.10066	0.0356706	0.185309	GGT5
ENSG00000099999	433.076	0.235116	0.183076	1.28425	0.199053	0.539447	RNF215
ENSG00000100003	975.406	-0.118285	0.16663	-0.709868	0.477786	0.799913	SEC14L2
ENSG00000100014	3604.36	0.0738814	0.0905758	0.815685	0.41468	0.757518	SPECC1L
ENSG00000100023	1452.77	0.148766	0.102028	1.45808	0.144818	0.454079	PPIL2
ENSG00000100024	22.6026	0.114953	0.629415	0.182635	0.855084	0.965166	UPB1
ENSG00000100027	258.24	0.607773	0.247975	2.45095	0.014248	0.0945888	YPEL1
ENSG00000100028	2760.12	0.0888242	0.110427	0.804368	0.421185	0.763941	SNRPD3
ENSG00000100029	2173.76	-0.0190014	0.146731	-0.129498	0.896963	0.976816	PES1
ENSG00000100030	7823.08	-0.0365884	0.0957051	-0.382304	0.702236	0.915331	MAPK1
ENSG00000100031	9.8186	-0.077169	1.17735	-0.0655447	0.94774	NA	GGT1
ENSG00000100033	3.85626	-4.14996	1.84378	-2.25079	0.0243989	NA	PRODH
ENSG00000100034	7015.12	-0.215601	0.134357	-1.60468	0.108563	0.384164	PPM1F
ENSG00000100036	529.99	-0.587429	0.173478	-3.3862	0.000708684	0.00911828	SLC35E4
ENSG00000100038	809.799	0.0413728	0.1829	0.226204	0.821042	0.954152	TOP3B
ENSG00000100053	8.29834	0.0740802	1.02032	0.0726046	0.942121	NA	CRYBB3
ENSG00000100055	5.11253	-1.09942	1.39588	-0.787618	0.43092	NA	CYTH4
ENSG00000100056	542.226	-0.138003	0.156927	-0.879408	0.37918	0.731713	ESS2
ENSG00000100058	566.988	0.0985019	0.172043	0.572542	0.566955	0.849948	CRYBB2P1
ENSG00000100060	4025.11	-0.307376	0.139303	-2.20653	0.0273469	0.154637	MFNG
ENSG00000100065	1466.85	-0.408778	0.170585	-2.39633	0.0165603	0.105748	CARD10
ENSG00000100068	87.8416	-0.31289	0.365655	-0.855699	0.392164	0.739821	LRP5L
ENSG00000100075	1467.71	0.00397731	0.121928	0.0326202	0.973977	0.995589	SLC25A1
ENSG00000100077	142.482	-0.539364	0.337584	-1.59772	0.110106	0.387178	GRK3
ENSG00000100078	5.97574	0.064011	1.64711	0.0388626	0.969	NA	PLA2G3
ENSG00000100083	1086.86	0.178723	0.117287	1.5238	0.127558	0.422542	GGA1
ENSG00000100084	1284.55	0.0832435	0.108682	0.765935	0.443715	0.777442	HIRA
ENSG00000100092	5.22728	-3.2081	1.75745	-1.82543	0.0679363	NA	SH3BP1
ENSG00000100097	13254.1	0.00366932	0.122331	0.0299951	0.976071	0.996144	LGALS1
ENSG00000100099	1305.31	-0.0519748	0.11473	-0.453018	0.650536	0.892666	HPS4
ENSG00000100100	416.18	-0.0229827	0.255329	-0.0900123	0.928277	0.986481	PIK3IP1
ENSG00000100101	0.669019	-2.01205	4.03473	-0.498683	0.618003	NA
ENSG00000100104	775.21	0.138355	0.148496	0.931709	0.351487	0.706075	SRRD
ENSG00000100105	618.984	0.471939	0.150395	3.138	0.00170102	0.0183609	PATZ1
ENSG00000100106	2748.29	-0.682035	0.0951707	-7.16644	7.69713e-13	7.33089e-11	TRIOBP
ENSG00000100109	1429.02	0.0203455	0.121076	0.168039	0.866553	0.967746	TFIP11
ENSG00000100116	243.192	0.756284	0.255591	2.95897	0.00308673	0.0298869	GCAT
ENSG00000100124	602.356	-0.112922	0.149915	-0.753241	0.451305	0.782441	ANKRD54
ENSG00000100129	12454.2	0.218012	0.102515	2.12663	0.0334506	0.17751	EIF3L
ENSG00000100138	1859.46	-0.0512446	0.140268	-0.365334	0.714862	0.919308	SNU13
ENSG00000100139	2281.26	0.0687393	0.115336	0.595992	0.551181	0.842278	MICALL1
ENSG00000100142	561.248	-0.0376774	0.152973	-0.246301	0.805449	0.949333	POLR2F
ENSG00000100147	54.6735	-0.065438	0.372096	-0.175863	0.860402	0.9666	CCDC134
ENSG00000100150	362.11	0.171213	0.257396	0.665173	0.50594	0.816636	DEPDC5
ENSG00000100151	284.967	0.131465	0.238167	0.551989	0.580956	0.85795	PICK1
ENSG00000100154	3625.01	-0.26506	0.121884	-2.17468	0.029654	0.163557	TTC28
ENSG00000100156	0.455746	-2.07319	4.01464	-0.516408	0.60557	NA	SLC16A8
ENSG00000100162	67.7074	2.30817	0.638112	3.61719	0.000297823	0.00436168	CENPM
ENSG00000100167	1.54333	-1.54491	2.21437	-0.697674	0.485381	NA	SEPTIN3
ENSG00000100170	0.359174	1.74552	4.04582	0.431437	0.66615	NA	SLC5A1
ENSG00000100181	397.493	-0.281016	0.217146	-1.29413	0.19562	0.534114	TPTEP1
ENSG00000100191	38.8722	0.122068	0.438603	0.278311	0.780773	0.942777	SLC5A4
ENSG00000100196	1242.29	0.200402	0.142211	1.40919	0.158778	0.47735	KDELR3
ENSG00000100197	0.264924	-0.186363	4.01873	-0.0463736	0.963012	NA	CYP2D6
ENSG00000100201	21758.8	-0.0210489	0.0817771	-0.257394	0.796875	0.946355	DDX17
ENSG00000100206	58.7586	-0.141301	0.388989	-0.363252	0.716416	0.919873	DMC1
ENSG00000100207	1673.77	0.0138963	0.123093	0.112893	0.910115	0.981284	TCF20
ENSG00000100209	282.003	0.115648	0.219395	0.527121	0.59811	0.867095	HSCB
ENSG00000100211	526.654	-0.042771	0.145778	-0.293398	0.769218	0.940987	CBY1
[truncated: 17,793 more rows]

## Sheet: ATACseq_HAoEC_OS-PS
seqnames	start	end	width	strand	annotation	geneChr	geneStart	geneEnd	geneLength	geneStrand	geneId	transcriptId	distanceToTSS	ENSEMBL	SYMBOL	GENENAME	baseMean	log2FoldChange	lfcSE	stat	pvalue	padj
chr7	30549964	30550280	316	*	Promoter (<=1kb)	7	30497077	30550761	53685	2	79017	ENST00000598361.4	481	ENSG00000006625	GGCT	gamma-glutamylcyclotransferase	114.122	-2.24281	0.25232	-8.88877	6.17908e-19	1.68605e-15
chr15	81098848	81099594	746	*	Promoter (<=1kb)	15	81099408	81136748	37341	1	161502	ENST00000561216.1	0	ENSG00000156206	CFAP161	cilia and flagella associated protein 161	570	-2.08323	0.139348	-14.9499	1.56005e-50	1.53245e-45
chr22	17639359	17639362	3	*	Promoter (<=1kb)	22	17638811	17730622	91812	1	23786	ENST00000355028.4	549	ENSG00000099968	BCL2L13	BCL2 like 13	4.45273	-2.08113	1.15429	-1.80296	0.0713952	NA
chr13	73995915	73996054	139	*	Promoter (<=1kb)	13	73812873	73995056	182184	2	11278	ENST00000472022.1	-860	ENSG00000118922	KLF12	Kruppel like factor 12	23.7567	-2.07353	0.504144	-4.11298	3.9059e-05	NA
chrX	71911484	71911490	6	*	Promoter (<=1kb)	23	71910818	72153286	242469	1	340527	ENST00000633930.1	667	ENSG00000204131	NHSL2	NHS like 2	3.49357	-2.05066	1.36982	-1.49702	0.134388	NA
chr3	64161715	64161918	203	*	Promoter (1-2kb)	3	64159914	64163438	3525	2	166336	ENST00000639113.1	1520	ENSG00000163637	PRICKLE2	prickle planar cell polarity protein 2	54.9908	-2.04733	0.332928	-6.14947	7.77443e-10	2.69855e-07
chr14	51398919	51399272	353	*	Promoter (1-2kb)	14	51392128	51397135	5008	2	105370496	ENST00000556762.1	-1785	ENSG00000258808	LINC02310	long intergenic non-protein coding RNA 2310	130.301	-2.02978	0.247301	-8.20774	2.25397e-16	3.62967e-13
chr9	131624303	131625013	710	*	Promoter (<=1kb)	9	131602114	131625948	23835	2	2889	ENST00000419442.1	935	ENSG00000107263	RAPGEF1	Rap guanine nucleotide exchange factor 1	265.57	-2.02146	0.201741	-10.0201	1.24388e-23	7.63672e-20
chr13	45401088	45401270	182	*	Promoter (1-2kb)	13	45397887	45402357	4471	2	253512	ENST00000618165.1	1087	ENSG00000174032	SLC25A30	solute carrier family 25 member 30	36.0348	-1.97888	0.461395	-4.2889	1.79559e-05	NA
chr5	136365498	136365542	44	*	Promoter (<=1kb)	5	136213435	136365537	152103	2	57113	ENST00000502753.4	0	ENSG00000069018	TRPC7	transient receptor potential cation channel subfamily C member 7	3.85379	-1.92614	1.25082	-1.53991	0.123583	NA
chr6	160123751	160123776	25	*	Promoter (1-2kb)	6	160121936	160158716	36781	1	6580	ENST00000460902.2	1816	ENSG00000175003	SLC22A1	solute carrier family 22 member 1	9.97717	-1.90462	0.79088	-2.40823	0.0160299	NA
chr6	21899812	21900094	282	*	Promoter (1-2kb)	6	21898720	22214505	315786	1	401237	ENST00000444265.6	1093	NA	CASC15	cancer susceptibility 15	46.2909	-1.87164	0.377537	-4.9575	7.14058e-07	9.29041e-05
chr10	48801053	48801577	524	*	Promoter (1-2kb)	10	48802738	48824169	21432	1	57705	ENST00000374161.7	-1161	ENSG00000128815	WDFY4	WDFY family member 4	118.135	-1.85848	0.236986	-7.84212	4.42991e-15	5.72572e-12
chr20	46393996	46394334	338	*	Promoter (<=1kb)	20	46387505	46394437	6933	2	63916	ENST00000462593.1	103	ENSG00000062598	ELMO2	engulfment and cell motility 2	62.2348	-1.84269	0.325809	-5.65573	1.55183e-08	3.73621e-06
chr17	80206796	80207042	246	*	Promoter (<=1kb)	17	80203833	80205949	2117	2	6448	ENST00000572730.1	-848	ENSG00000181523	SGSH	N-sulfoglucosamine sulfohydrolase	78.0638	-1.78305	0.299089	-5.96161	2.49767e-09	7.54918e-07
chr4	92305901	92305958	57	*	Promoter (1-2kb)	4	92304657	93772498	1467842	1	2895	ENST00000510992.5	1245	ENSG00000152208	GRID2	glutamate ionotropic receptor delta type subunit 2	10.8282	-1.78245	0.732184	-2.43443	0.0149155	NA
chr17	44854462	44854710	248	*	Promoter (<=1kb)	17	44851257	44854662	3406	2	9343	ENST00000589769.1	0	ENSG00000108883	EFTUD2	elongation factor Tu GTP binding domain containing 2	41.9788	-1.76267	0.370673	-4.75532	1.98133e-06	NA
chr16	70391888	70392358	470	*	Promoter (1-2kb)	16	70381574	70393759	12186	2	6483	ENST00000567822.1	1401	ENSG00000157350	ST3GAL2	ST3 beta-galactoside alpha-2,3-sialyltransferase 2	101.595	-1.76215	0.250753	-7.02741	2.10404e-12	1.5424e-09
chr13	75788530	75789082	552	*	Promoter (<=1kb)	13	75788838	75817278	28441	1	4008	ENST00000497947.6	0	ENSG00000136153	LMO7	LIM domain 7	337.352	-1.75242	0.633987	-2.76413	0.00570751	0.0673378
chr8	40343788	40343953	165	*	Promoter (<=1kb)	8	40299075	40343402	44328	2	112543493	ENST00000522486.1	-387	ENSG00000253802	SIRLNT	SIRT1 regulating lncRNA tumor promoter	62.3775	-1.74859	0.335409	-5.21329	1.85525e-07	3.06291e-05
chr5	180815460	180815680	220	*	Promoter (<=1kb)	5	180784782	180815541	30760	2	4245	ENST00000333055.8	0	ENSG00000131446	MGAT1	alpha-1,3-mannosyl-glycoprotein 2-beta-N-acetylglucosaminyltransferase	60.2681	-1.72464	0.336269	-5.12875	2.9167e-07	4.53339e-05
chrX	15751389	15751539	150	*	Promoter (1-2kb)	23	15749970	15784535	34566	1	11238	ENST00000454127.2	1420	ENSG00000169239	CA5B	carbonic anhydrase 5B	39.1691	-1.72285	0.391467	-4.40101	1.07748e-05	NA
chr7	93115887	93116066	179	*	Promoter (1-2kb)	7	93102249	93117962	15714	2	54809	ENST00000446617.1	1896	ENSG00000205413	SAMD9	sterile alpha motif domain containing 9	31.851	-1.72132	0.434602	-3.96069	7.47347e-05	NA
chrX	22060620	22061100	480	*	Promoter (<=1kb)	23	22060834	22248361	187528	1	5251	ENST00000684745.1	0	ENSG00000102174	PHEX	phosphate regulating endopeptidase homolog X-linked	93.3202	-1.69457	0.262992	-6.44342	1.16813e-10	5.22029e-08
chr2	127217960	127218308	348	*	Promoter (1-2kb)	2	127183832	127220299	36468	2	339761	ENST00000664447.2	1991	ENSG00000186684	CYP27C1	cytochrome P450 family 27 subfamily C member 1	135.016	-1.68762	0.254799	-6.62335	3.51157e-11	1.86457e-08
chr1	56515307	56515716	409	*	Promoter (1-2kb)	1	56496276	56517006	20731	2	8613	ENST00000472957.1	1290	ENSG00000162407	PLPP3	phospholipid phosphatase 3	119.989	-1.67383	0.230172	-7.27211	3.53914e-13	2.99701e-10
chr5	44807363	44807516	153	*	Promoter (1-2kb)	5	44775694	44808666	32973	2	100506674	ENST00000508123.1	1150	NA	MRPS30-DT	MRPS30 divergent transcript	47.7872	-1.64744	0.398799	-4.13101	3.61176e-05	0.00222298
chr21	28675304	28675775	471	*	Promoter (<=1kb)	21	28439346	28674848	235503	2	29104	ENST00000433310.6	-457	ENSG00000156239	N6AMT1	N-6 adenine-specific DNA methyltransferase 1	93.6402	-1.64265	0.284684	-5.77007	7.92403e-09	2.07682e-06
chr5	150603022	150603674	652	*	Promoter (1-2kb)	5	150601080	150654232	53153	1	11346	ENST00000394243.5	1943	ENSG00000171992	SYNPO	synaptopodin	218.961	-1.64105	0.182104	-9.01164	2.03007e-19	6.04289e-16
chr1	207908160	207908816	656	*	Promoter (1-2kb)	1	207909992	207917088	7097	1	107985253	ENST00000648286.1	-1176	NA	LOC107985253	uncharacterized LOC107985253	245.785	-1.61994	0.201701	-8.03137	9.63891e-16	1.43461e-12
chr1	24409617	24409809	192	*	Promoter (<=1kb)	1	24401079	24410779	9701	2	90529	ENST00000475760.1	970	ENSG00000001460	STPG1	sperm tail PG-rich repeat containing 1	43.3515	-1.61981	0.39538	-4.09685	4.18809e-05	0.00247087
chr8	142754410	142754575	165	*	Promoter (1-2kb)	8	142750150	142752532	2383	2	137797	ENST00000359228.4	-1879	ENSG00000197353	LYPD2	LY6/PLAUR domain containing 2	77.5373	-1.61853	0.280031	-5.77982	7.47801e-09	1.98533e-06
chr1	114745366	114745530	164	*	Promoter (1-2kb)	1	114737988	114746859	8872	2	7812	ENST00000534389.2	1329	ENSG00000009307	CSDE1	cold shock domain containing E1	58.5979	-1.6156	0.332479	-4.85926	1.17826e-06	0.000141494
chr7	39702166	39702337	171	*	Promoter (1-2kb)	7	39700880	39706302	5423	1	5898	ENST00000466491.1	1287	ENSG00000006451	RALA	RAS like proto-oncogene A	27.8633	-1.61163	0.448612	-3.59249	0.000327529	NA
chr12	29425796	29426025	229	*	Promoter (<=1kb)	12	29425925	29487488	61564	1	101055625	ENST00000549411.1	0	ENSG00000257599	OVCH1-AS1	OVCH1 antisense RNA 1	55.5854	-1.60281	0.329962	-4.85756	1.18842e-06	0.000142245
chr17	40480084	40480839	755	*	Promoter (<=1kb)	17	40475828	40480875	5048	2	84951	ENST00000394072.7	36	ENSG00000131746	TNS4	tensin 4	298.401	-1.59407	0.192074	-8.29926	1.04765e-16	1.88861e-13
chr9	97221311	97221317	6	*	Promoter (<=1kb)	9	97156570	97221235	64666	2	101926917	ENST00000354752.5	-77	NA	ANKRD18CP	ankyrin repeat domain 18C, pseudogene	0.826711	-1.58646	2.74904	-0.577098	0.563873	NA
chr9	136974946	136975243	297	*	Promoter (<=1kb)	9	136975092	136979021	3930	1	5730	ENST00000640716.1	0	ENSG00000107317	PTGDS	prostaglandin D2 synthase	125.284	-1.58033	0.225479	-7.00878	2.40403e-12	1.74926e-09
chr17	20086785	20087003	218	*	Promoter (<=1kb)	17	20087021	20239427	152407	1	92521	ENST00000395529.7	-18	ENSG00000128487	SPECC1	sperm antigen with calponin homology and coiled-coil domains 1	49.8127	-1.57009	0.337409	-4.65338	3.26543e-06	0.000327647
chr1	25985186	25985557	371	*	Promoter (1-2kb)	1	25982404	25984109	1706	2	5051	ENST00000476611.1	-1078	ENSG00000158006	PAFAH2	platelet activating factor acetylhydrolase 2	82.1859	-1.56254	0.277991	-5.62082	1.90055e-08	4.41355e-06
chr21	33246526	33246876	350	*	Promoter (<=1kb)	21	33246774	33283212	36439	1	3588	ENST00000433395.6	0	ENSG00000243646	IL10RB	interleukin 10 receptor subunit beta	52.7269	-1.55376	0.33081	-4.69685	2.64209e-06	0.00027907
chr11	116871322	116871520	198	*	Promoter (1-2kb)	11	116843402	116870251	26850	2	23387	ENST00000488337.5	-1072	ENSG00000160584	SIK3	SIK family kinase 3	70.6029	-1.54598	0.29367	-5.26434	1.40696e-07	2.43321e-05
chr4	145825177	145825387	210	*	Promoter (1-2kb)	4	145759007	145823925	64919	2	152485	ENST00000672161.1	-1253	ENSG00000151612	ZNF827	zinc finger protein 827	28.8376	-1.53959	0.44466	-3.46239	0.000535402	NA
chr3	108053627	108053743	116	*	Promoter (<=1kb)	3	108043298	108054739	11442	2	961	ENST00000471694.1	996	ENSG00000196776	CD47	CD47 molecule	18.3573	-1.53614	0.555726	-2.76421	0.00570606	NA
chr19	722592	723102	510	*	Promoter (<=1kb)	19	722504	727088	4585	1	5064	ENST00000586776.1	89	ENSG00000099864	PALM	paralemmin	132.781	-1.53344	0.226983	-6.75577	1.42081e-11	8.16183e-09
chr9	98306827	98307122	295	*	Promoter (<=1kb)	9	98304178	98306571	2394	2	9568	ENST00000634354.1	-257	ENSG00000136928	GABBR2	gamma-aminobutyric acid type B receptor subunit 2	73.2273	-1.53234	0.291624	-5.25451	1.48416e-07	2.53109e-05
chr17	1231546	1231885	339	*	Promoter (1-2kb)	17	1003519	1229738	226220	2	29	ENST00000574139.7	-1809	ENSG00000159842	ABR	ABR activator of RhoGEF and GTPase	100.258	-1.52735	0.253658	-6.02128	1.73042e-09	5.48326e-07
chr7	75007897	75007964	67	*	Promoter (<=1kb)	7	75007888	75021943	14056	1	729438	ENST00000622472.1	10	ENSG00000274070	CASTOR2	cytosolic arginine sensor for mTORC1 subunit 2	9.91125	-1.52678	0.7544	-2.02383	0.0429878	NA
chr12	52045823	52046312	489	*	Promoter (1-2kb)	12	52043839	52054673	10835	1	3164	ENST00000547206.5	1985	ENSG00000123358	NR4A1	nuclear receptor subfamily 4 group A member 1	218.916	-1.52239	0.177627	-8.57073	1.02831e-17	2.34911e-14
chr12	94994410	94994591	181	*	Promoter (1-2kb)	12	94971333	94995678	24346	2	55967	ENST00000538372.7	1087	ENSG00000184752	NDUFA12	NADH:ubiquinone oxidoreductase subunit A12	35.176	-1.51524	0.409291	-3.70211	0.000213812	NA
chr14	74510958	74511233	275	*	Promoter (1-2kb)	14	74506706	74509807	3102	2	4053	ENST00000556206.1	-1152	ENSG00000119681	LTBP2	latent transforming growth factor beta binding protein 2	108.076	-1.51293	0.249679	-6.05949	1.3655e-09	4.47114e-07
chr11	76524976	76525289	313	*	Promoter (1-2kb)	11	76526462	76544386	17925	1	56946	ENST00000524451.1	-1173	ENSG00000158636	EMSY	EMSY transcriptional repressor, BRCA2 interacting	48.2011	-1.51127	0.343864	-4.39495	1.10797e-05	0.000881989
chr15	34362393	34362822	429	*	Promoter (<=1kb)	15	34358909	34362655	3747	2	254531	ENST00000563748.5	0	ENSG00000176454	LPCAT4	lysophosphatidylcholine acyltransferase 4	140.948	-1.50972	0.214032	-7.05371	1.74211e-12	1.29644e-09
chr4	11913057	11913207	150	*	Promoter (1-2kb)	4	11914667	11919688	5022	1	107986179	ENST00000514103.1	-1460	NA	LOC107986179	uncharacterized LOC107986179	56.1257	-1.50922	0.350421	-4.30687	1.65583e-05	0.00119599
chr6	30955126	30955218	92	*	Promoter (<=1kb)	6	30945979	30954862	8884	2	102723346	ENST00000419481.1	-265	NA	HCG21	HLA complex group 21	19.5116	-1.5048	0.557617	-2.69863	0.00696253	NA
chr11	3644906	3645188	282	*	Promoter (<=1kb)	11	3645128	3659612	14485	1	417	ENST00000529556.1	0	ENSG00000129744	ART1	ADP-ribosyltransferase 1	75.9473	-1.50118	0.286885	-5.23267	1.67077e-07	2.81511e-05
chr6	34671833	34672202	369	*	Promoter (<=1kb)	6	34590509	34671956	81448	2	64771	ENST00000374021.1	0	ENSG00000196821	ILRUN	inflammation and lipid regulator with UBA-like and NBR1-like domains	111.946	-1.50066	0.233548	-6.42551	1.3143e-10	5.78947e-08
chr10	60141299	60141554	255	*	Promoter (<=1kb)	10	60029690	60141016	111327	2	288	ENST00000355288.6	-284	ENSG00000151150	ANK3	ankyrin 3	66.4664	-1.49871	0.305991	-4.8979	9.68683e-07	0.000119541
chr2	69779324	69779582	258	*	Promoter (1-2kb)	2	69781162	69804589	23428	1	307	ENST00000484219.1	-1580	ENSG00000196975	ANXA4	annexin A4	71.3364	-1.47618	0.31664	-4.66201	3.13132e-06	0.00031809
chr16	70478790	70479375	585	*	Promoter (1-2kb)	16	70477358	70480274	2917	1	197258	ENST00000485034.1	1433	ENSG00000157353	FCSK	fucose kinase	384.27	-1.47478	0.150284	-9.81332	9.86712e-23	5.38476e-19
chr14	103677029	103677128	99	*	Promoter (1-2kb)	14	103675570	103685702	10133	1	3831	ENST00000555856.1	1460	ENSG00000126214	KLC1	kinesin light chain 1	19.3266	-1.46626	0.561691	-2.61044	0.00904256	NA
chr19	45722047	45722346	299	*	Promoter (1-2kb)	19	45712944	45723496	10553	2	23403	ENST00000586899.1	1150	ENSG00000177051	FBXO46	F-box protein 46	194.642	-1.46494	0.185519	-7.89643	2.87006e-15	3.91567e-12
chr19	14395542	14395627	85	*	Promoter (<=1kb)	19	14396250	14397911	1662	1	976	ENST00000591737.1	-623	ENSG00000123146	ADGRE5	adhesion G protein-coupled receptor E5	18.597	-1.46368	0.548843	-2.66685	0.00765655	NA
chr17	19750870	19751134	264	*	Promoter (1-2kb)	17	19743232	19748943	5712	2	218	ENST00000574162.5	-1928	ENSG00000108602	ALDH3A1	aldehyde dehydrogenase 3 family member A1	108.735	-1.46155	0.24224	-6.03349	1.60453e-09	5.1508e-07
chr7	143704568	143705106	538	*	Promoter (1-2kb)	7	143702981	143730409	27429	1	285966	ENST00000441159.7	1588	ENSG00000170379	TCAF2	TRPM8 channel associated factor 2	100.964	-1.46113	0.249323	-5.86039	4.61785e-09	1.30349e-06
chr3	125148979	125149242	263	*	Promoter (1-2kb)	3	125108045	125151215	43171	2	84561	ENST00000495105.5	1973	ENSG00000221955	SLC12A8	solute carrier family 12 member 8	74.3636	-1.46005	0.291292	-5.01234	5.37732e-07	7.39579e-05
chr12	108828796	108829088	292	*	Promoter (1-2kb)	12	108791926	108827551	35626	2	54434	ENST00000326470.9	-1246	ENSG00000084112	SSH1	slingshot protein phosphatase 1	139.896	-1.45736	0.230144	-6.33237	2.41424e-10	9.88138e-08
chr5	81989197	81989504	307	*	Promoter (1-2kb)	5	81987558	82252713	265156	1	83734	ENST00000513634.1	1640	ENSG00000152348	ATG10	autophagy related 10	57.0863	-1.4567	0.32446	-4.4896	7.13571e-06	0.000617576
chr8	43001607	43001825	218	*	Promoter (<=1kb)	8	43000819	43013121	12303	1	84376	ENST00000524839.1	789	ENSG00000168172	HOOK3	hook microtubule tethering protein 3	54.721	-1.45647	0.350423	-4.1563	3.23438e-05	0.00203664
chr16	535566	535818	252	*	Promoter (<=1kb)	16	535316	535368	53	1	100847028	ENST00000581803.1	251	ENSG00000266124	MIR5587	microRNA 5587	88.7361	-1.44338	0.273756	-5.2725	1.34578e-07	2.33564e-05
chr15	62561138	62561460	322	*	Promoter (<=1kb)	15	62561365	62844631	283267	1	83660	ENST00000561311.5	0	ENSG00000171914	TLN2	talin 2	50.5338	-1.44275	0.345961	-4.17025	3.04266e-05	0.00193703
chr3	108053178	108053398	220	*	Promoter (1-2kb)	3	108043298	108054739	11442	2	961	ENST00000471694.1	1341	ENSG00000196776	CD47	CD47 molecule	34.517	-1.44271	0.451641	-3.19436	0.0014014	NA
chr8	38397420	38397833	413	*	Promoter (<=1kb)	8	38396973	38408544	11572	1	137994	ENST00000527710.5	448	ENSG00000165046	LETM2	leucine zipper and EF-hand containing transmembrane protein 2	89.3608	-1.44214	0.276716	-5.21162	1.87199e-07	3.08536e-05
chr14	24335672	24336163	491	*	Promoter (<=1kb)	14	24332238	24335093	2856	2	196883	ENST00000557099.2	-580	ENSG00000129467	ADCY4	adenylate cyclase 4	240.272	-1.43959	0.170388	-8.44888	2.94101e-17	6.14678e-14
chr2	61193778	61193937	159	*	Promoter (<=1kb)	2	61190627	61193365	2739	2	9736	ENST00000498268.1	-414	ENSG00000115464	USP34	ubiquitin specific peptidase 34	30.4094	-1.43483	0.424774	-3.37787	0.000730506	NA
chr3	11634059	11634585	526	*	Promoter (<=1kb)	3	11601992	11633671	31680	2	9686	ENST00000480288.1	-389	ENSG00000144560	VGLL4	vestigial like family member 4	220.362	-1.43277	0.173918	-8.23819	1.74841e-16	2.99681e-13
chr2	43294284	43294459	175	*	Promoter (1-2kb)	2	43286985	43293066	6082	2	63892	ENST00000485018.1	-1219	ENSG00000115970	THADA	THADA armadillo repeat containing	20.8069	-1.4255	0.527485	-2.70244	0.00688324	NA
chr2	237540842	237541060	218	*	Promoter (<=1kb)	2	237540865	237553991	13127	1	79083	ENST00000434770.1	0	ENSG00000115648	MLPH	melanophilin	64.9865	-1.41777	0.300589	-4.71664	2.39769e-06	0.000256287
chr7	75201524	75202164	640	*	Promoter (<=1kb)	7	75199671	75201718	2048	2	2970	ENST00000611799.1	0	ENSG00000277053	GTF2IP1	general transcription factor IIi pseudogene 1	171.432	-1.4049	0.198312	-7.08431	1.39735e-12	1.08081e-09
chr2	100193529	100193690	161	*	Promoter (1-2kb)	2	100104514	100192428	87915	2	3899	ENST00000672999.1	-1102	ENSG00000144218	AFF3	AF4/FMR2 family member 3	65.4948	-1.40452	0.339475	-4.13735	3.51345e-05	0.00217913
chr9	37587601	37587758	157	*	Promoter (1-2kb)	9	37512547	37588874	76328	2	26267	ENST00000541804.1	1116	ENSG00000147912	FBXO10	F-box protein 10	42.868	-1.40336	0.370004	-3.79282	0.000148947	0.00641157
chr16	70392434	70392557	123	*	Promoter (1-2kb)	16	70381574	70393759	12186	2	6483	ENST00000567822.1	1202	ENSG00000157350	ST3GAL2	ST3 beta-galactoside alpha-2,3-sialyltransferase 2	22.8637	-1.40329	0.530356	-2.64595	0.00814627	NA
chr11	7089617	7089696	79	*	Promoter (<=1kb)	11	7088998	7091148	2151	1	27288	ENST00000306904.7	620	ENSG00000170748	RBMXL2	RBMX like 2	13.7062	-1.4007	0.640304	-2.18755	0.0287022	NA
chr20	3734160	3734476	316	*	Promoter (1-2kb)	20	3732711	3753111	20401	1	116835	ENST00000399701.1	1450	ENSG00000132622	HSPA12B	heat shock protein family A (Hsp70) member 12B	91.1622	-1.39626	0.255447	-5.46592	4.60508e-08	9.44388e-06
chr16	84928723	84929018	295	*	Promoter (<=1kb)	16	84928353	84939603	11251	1	105371379	ENST00000569104.1	371	NA	LINC02176	long intergenic non-protein coding RNA 2176	103.528	-1.3937	0.243101	-5.73299	9.86741e-09	2.49816e-06
chr12	41189640	41189647	7	*	Promoter (1-2kb)	12	41188320	41574745	386426	1	29951	ENST00000402685.7	1321	ENSG00000165966	PDZRN4	PDZ domain containing ring finger 4	4.748	-1.39319	1.05728	-1.31772	0.187598	NA
chr12	57816785	57817054	269	*	Promoter (<=1kb)	12	57797882	57816471	18590	2	10677	ENST00000257861.7	-315	ENSG00000135407	AVIL	advillin	68.496	-1.38999	0.303814	-4.57513	4.75922e-06	0.000444394
chr12	70639103	70639268	165	*	Promoter (1-2kb)	12	70591734	70637440	45707	2	5787	ENST00000552253.1	-1664	ENSG00000127329	PTPRB	protein tyrosine phosphatase receptor type B	37.6822	-1.38858	0.391409	-3.54765	0.00038868	NA
chr9	86100038	86100041	3	*	Promoter (<=1kb)	9	86026147	86100149	74003	2	51280	ENST00000388711.7	108	ENSG00000135052	GOLM1	golgi membrane protein 1	1.3154	-1.38555	2.01875	-0.686343	0.492497	NA
chr9	112836848	112837102	254	*	Promoter (1-2kb)	9	112838585	112866525	27941	1	401548	ENST00000416585.1	-1483	ENSG00000148158	SNX30	sorting nexin family member 30	28.6584	-1.38429	0.46583	-2.97166	0.00296192	NA
chr17	82919960	82920110	150	*	Promoter (<=1kb)	17	82920192	82945900	25709	1	6904	ENST00000574886.2	-82	ENSG00000141556	TBCD	tubulin folding cofactor D	33.6043	-1.38269	0.414325	-3.3372	0.00084626	NA
chr3	49279483	49279694	211	*	Promoter (<=1kb)	3	49278143	49279231	1089	2	7375	ENST00000483212.1	-253	ENSG00000114316	USP4	ubiquitin specific peptidase 4	65.8742	-1.37762	0.304637	-4.52216	6.12123e-06	0.000546632
chr5	95737814	95737966	152	*	Promoter (<=1kb)	5	95736939	95763542	26604	1	22836	ENST00000502541.1	876	ENSG00000164292	RHOBTB3	Rho related BTB domain containing 3	18.8619	-1.37511	0.537819	-2.55683	0.010563	NA
chr19	39084607	39084714	107	*	Promoter (<=1kb)	19	39084368	39111493	27126	1	390928	ENST00000331256.10	240	ENSG00000183760	ACP7	acid phosphatase 7, tartrate resistant (putative)	18.1717	-1.37482	0.559603	-2.45677	0.0140192	NA
chr17	20922436	20922653	217	*	Promoter (1-2kb)	17	20921152	20930046	8895	1	440416	ENST00000577841.1	1285	ENSG00000233098	CCDC144NL-AS1	CCDC144NL antisense RNA 1	39.3221	-1.37396	0.410924	-3.34359	0.000827024	NA
chr9	34398415	34398603	188	*	Promoter (<=1kb)	9	34379019	34397810	18792	2	84688	ENST00000297623.7	-606	ENSG00000164972	C9orf24	chromosome 9 open reading frame 24	37.8374	-1.36808	0.388872	-3.51807	0.000434693	NA
chr18	48687440	48687688	248	*	Promoter (<=1kb)	18	48673575	48688419	14845	2	105372107	ENST00000589818.1	731	NA	LOC105372107	uncharacterized LOC105372107	47.9061	-1.36485	0.363462	-3.75513	0.000173251	0.00716574
chr11	680943	680987	44	*	Promoter (<=1kb)	11	653941	681045	27105	2	10522	ENST00000525904.5	58	ENSG00000177030	DEAF1	DEAF1 transcription factor	6.95237	-1.36062	0.904058	-1.50501	0.13232	NA
chr9	84062632	84062852	220	*	Promoter (<=1kb)	9	84063443	84094577	31135	1	101927575	ENST00000423515.2	-591	ENSG00000227463	LOC101927575	uncharacterized LOC101927575	52.1339	-1.35727	0.332377	-4.08351	4.43601e-05	0.00259223
chr7	1156758	1157051	293	*	Promoter (<=1kb)	7	1152906	1157732	4827	2	90637	ENST00000574135.2	681	ENSG00000178381	ZFAND2A	zinc finger AN1-type containing 2A	151.783	-1.35491	0.216067	-6.2708	3.59197e-10	1.38566e-07
chr6	150370523	150370649	126	*	Promoter (<=1kb)	6	150369977	150395532	25556	1	389434	ENST00000425615.3	547	ENSG00000009765	IYD	iodotyrosine deiodinase	24.9128	-1.35421	0.492507	-2.74963	0.00596635	NA
chr1	46188746	46188917	171	*	Promoter (<=1kb)	1	46188684	46189567	884	2	55624	ENST00000475642.1	650	ENSG00000085998	POMGNT1	protein O-linked mannose N-acetylglucosaminyltransferase 1 (beta 1,2-)	71.143	-1.35271	0.288434	-4.68983	2.73427e-06	0.00028543
chr1	31376832	31377116	284	*	Promoter (<=1kb)	1	31365891	31376850	10960	2	2170	ENST00000482018.1	0	ENSG00000121769	FABP3	fatty acid binding protein 3	152.001	-1.35203	0.2526	-5.35244	8.6776e-08	1.5999e-05
chr17	78491551	78491636	85	*	Promoter (<=1kb)	17	78423905	78491490	67586	2	8632	ENST00000586052.5	-62	ENSG00000187775	DNAH17	dynein axonemal heavy chain 17	27.4306	-1.3508	0.451901	-2.98915	0.00279757	NA
chrX	362878	362921	43	*	Promoter (1-2kb)	23	346637	361516	14880	2	28227	ENST00000496630.6	-1363	ENSG00000167393	PPP2R3B	protein phosphatase 2 regulatory subunit B''beta	16.9413	-1.34956	0.634651	-2.12645	0.0334655	NA
chr15	74196211	74196631	420	*	Promoter (<=1kb)	15	74179469	74196289	16821	2	64220	ENST00000545137.5	0	ENSG00000137868	STRA6	signaling receptor and transporter of retinol STRA6	132.319	-1.34932	0.217796	-6.19533	5.81617e-10	2.07756e-07
chr17	44854843	44854855	12	*	Promoter (<=1kb)	17	44851257	44854662	3406	2	9343	ENST00000589769.1	-182	ENSG00000108883	EFTUD2	elongation factor Tu GTP binding domain containing 2	11.1151	-1.33492	0.715971	-1.86449	0.0622531	NA
chr1	20243043	20243204	161	*	Promoter (<=1kb)	1	20243095	20244655	1561	1	105376827	ENST00000435552.1	0	ENSG00000228105	LINC01757	long intergenic non-protein coding RNA 1757	23.4505	-1.33354	0.517298	-2.5779	0.00994035	NA
chr5	151211822	151212458	636	*	Promoter (<=1kb)	5	151212150	151266880	54731	1	2760	ENST00000523466.5	0	ENSG00000196743	GM2A	GM2 ganglioside activator	175.835	-1.32774	0.206731	-6.42252	1.34035e-10	5.85174e-08
chr17	44933816	44933985	169	*	Promoter (<=1kb)	17	44932322	44933976	1655	2	146909	ENST00000585687.1	0	ENSG00000186185	KIF18B	kinesin family member 18B	39.2598	-1.3268	0.38355	-3.45927	0.000541643	NA
chr5	1295338	1295441	103	*	Promoter (<=1kb)	5	1253167	1295068	41902	2	7015	ENST00000310581.10	-271	ENSG00000164362	TERT	telomerase reverse transcriptase	26.4332	-1.32392	0.47631	-2.77954	0.0054436	NA
chr3	8638849	8639333	484	*	Promoter (<=1kb)	3	8619600	8640015	20416	2	51066	ENST00000495366.5	682	ENSG00000125046	SSUH2	ssu-2 homolog	126.005	-1.32161	0.247963	-5.32988	9.82785e-08	1.78118e-05
chr14	23572897	23573182	285	*	Promoter (<=1kb)	14	23569415	23573001	3587	2	84502	ENST00000544177.1	0	ENSG00000092051	JPH4	junctophilin 4	87.889	-1.32013	0.257648	-5.12376	2.99499e-07	4.6258e-05
chr19	56301590	56302188	598	*	Promoter (<=1kb)	19	56301936	56310446	8511	1	100506374	ENST00000593151.2	0	ENSG00000267710	EDDM13	epididymal protein 13	131.829	-1.31524	0.224898	-5.84816	4.97048e-09	1.38316e-06
chr1	153688262	153688564	302	*	Promoter (<=1kb)	1	153688724	153693968	5245	1	4881	ENST00000368677.2	-160	ENSG00000169418	NPR1	natriuretic peptide receptor 1	71.3223	-1.31505	0.297971	-4.41336	1.01779e-05	0.00082355
chr19	45842233	45842384	151	*	Promoter (<=1kb)	19	45838555	45842732	4178	2	8189	ENST00000601582.1	348	ENSG00000125755	SYMPK	symplekin scaffold protein	25.0233	-1.31388	0.473233	-2.7764	0.0054965	NA
chr2	218698979	218699162	183	*	Promoter (1-2kb)	2	218697028	218698701	1674	1	27148	ENST00000462031.1	1952	ENSG00000163482	STK36	serine/threonine kinase 36	28.3409	-1.31351	0.439987	-2.98533	0.00283272	NA
chr4	151701216	151701422	206	*	Promoter (<=1kb)	4	151670888	151701518	30631	2	5188	ENST00000510720.1	96	ENSG00000059691	GATB	glutamyl-tRNA amidotransferase subunit B	28.7485	-1.31314	0.438655	-2.99355	0.00275752	NA
chr4	2852561	2853022	461	*	Promoter (<=1kb)	4	2853134	2868095	14962	1	118	ENST00000374281.2	-112	ENSG00000087274	ADD1	adducin 1	102.773	-1.31268	0.24598	-5.33653	9.47402e-08	1.73627e-05
chr2	37562362	37562542	180	*	Promoter (<=1kb)	2	37562486	37613128	50643	1	105374464	ENST00000659653.1	0	NA	LOC105374464	uncharacterized LOC105374464	48.5281	-1.31072	0.348198	-3.76429	0.000167025	0.00697281
chr5	113234448	113234852	404	*	Promoter (<=1kb)	5	113026132	113234677	208546	2	4163	ENST00000515367.6	0	ENSG00000171444	MCC	MCC regulator of WNT signaling pathway	88.6874	-1.3103	0.272122	-4.81511	1.4712e-06	0.000170422
chr2	232567595	232568068	473	*	Promoter (<=1kb)	2	232566944	232569833	2890	1	9470	ENST00000478878.1	652	ENSG00000135930	EIF4E2	eukaryotic translation initiation factor 4E family member 2	94.7131	-1.30837	0.266196	-4.91508	8.87468e-07	0.000111337
chr13	113176379	113176576	197	*	Promoter (1-2kb)	13	113177612	113178375	764	2	55795	ENST00000463102.5	1799	ENSG00000126226	PCID2	PCI domain containing 2	44.7698	-1.30704	0.354008	-3.69212	0.000222397	0.0085504
chr7	36630	36738	108	*	Promoter (1-2kb)	7	31390	35489	4100	2	105375112	ENST00000632586.1	-1142	NA	LOC105375112	putative protein FAM157B	32.4169	-1.30474	0.423103	-3.08374	0.00204416	NA
chr5	66440245	66440685	440	*	Promoter (<=1kb)	5	66350148	66440356	90209	2	105379003	ENST00000652255.1	0	NA	LOC105379003	uncharacterized LOC105379003	121.335	-1.29519	0.26299	-4.92487	8.44157e-07	0.000106721
chr18	35904792	35905144	352	*	Promoter (<=1kb)	18	35904818	35904926	109	2	406963	ENST00000385062.1	0	ENSG00000207797	MIR187	microRNA 187	46.3207	-1.2931	0.361516	-3.57689	0.000347712	0.0115314
chr5	56466276	56466336	60	*	Promoter (1-2kb)	5	56455684	56465096	9413	2	102467147	ENST00000653172.1	-1181	ENSG00000248727	LINC01948	long intergenic non-protein coding RNA 1948	15.1963	-1.29235	0.595483	-2.17025	0.0299876	NA
chr20	44247407	44247410	3	*	Promoter (<=1kb)	20	44247333	44258535	11203	1	78997	ENST00000372952.7	75	ENSG00000124194	GDAP1L1	ganglioside induced differentiation associated protein 1 like 1	11.9132	-1.29136	0.746321	-1.7303	0.0835765	NA
chr19	39166732	39166986	254	*	Promoter (1-2kb)	19	39168611	39179406	10796	1	10298	ENST00000360442.7	-1625	ENSG00000130669	PAK4	p21 (RAC1) activated kinase 4	61.2937	-1.2899	0.326283	-3.95331	7.70767e-05	0.0039393
chr7	150237161	150237342	181	*	Promoter (<=1kb)	7	150234194	150237608	3415	2	653857	ENST00000653791.1	266	ENSG00000106526	ACTR3C	actin related protein 3C	30.5724	-1.28875	0.454297	-2.8368	0.00455683	NA
chr18	3960750	3960935	185	*	Promoter (1-2kb)	18	3962353	4014712	52360	1	101410534	ENST00000652891.1	-1418	NA	DLGAP1-AS4	DLGAP1 antisense RNA 4	20.4204	-1.28762	0.520579	-2.47343	0.0133824	NA
chr15	101709561	101709703	142	*	Promoter (<=1kb)	15	101654213	101708828	54616	2	123283	ENST00000558533.5	-734	ENSG00000185418	TARS3	threonyl-tRNA synthetase 3	23.7824	-1.28654	0.502418	-2.5607	0.0104463	NA
chr7	74743898	74744501	603	*	Promoter (<=1kb)	7	74744344	74749452	5109	1	2969	ENST00000438130.6	0	ENSG00000263001	GTF2I	general transcription factor IIi	152.908	-1.28367	0.204706	-6.27082	3.59142e-10	1.38566e-07
chr10	76316236	76316415	179	*	Promoter (1-2kb)	10	76318334	76560167	241834	1	83938	ENST00000496424.2	-1919	ENSG00000148655	LRMDA	leucine rich melanocyte differentiation associated	24.7486	-1.28153	0.483247	-2.6519	0.00800393	NA
chr13	18212927	18213163	236	*	Promoter (<=1kb)	13	18211959	18230481	18523	1	26080	ENST00000651051.1	969	ENSG00000279516	FAM230C	family with sequence similarity 230 member C	115.08	-1.2814	0.628235	-2.03968	0.0413823	0.210819
chr8	30742577	30742840	263	*	Promoter (1-2kb)	8	30744164	30767006	22843	1	7993	ENST00000265616.10	-1324	ENSG00000104691	UBXN8	UBX domain protein 8	53.4735	-1.28133	0.325248	-3.93954	8.16381e-05	0.00411673
chr21	44648054	44648306	252	*	Promoter (1-2kb)	21	44646414	44647650	1237	1	386678	ENST00000334670.9	1641	ENSG00000243489	KRTAP10-11	keratin associated protein 10-11	41.3908	-1.27764	0.389295	-3.28194	0.00103097	NA
chr16	57668190	57668367	177	*	Promoter (<=1kb)	16	57668277	57678282	10006	1	222487	ENST00000568245.5	0	ENSG00000182885	ADGRG3	adhesion G protein-coupled receptor G3	45.2151	-1.27592	0.357928	-3.56474	0.000364213	0.0119001
chr6	35737388	35737423	35	*	Promoter (<=1kb)	6	35737092	35738509	1418	1	221481	ENST00000471400.1	297	ENSG00000157343	ARMC12	armadillo repeat containing 12	10.2079	-1.27375	0.742436	-1.71564	0.0862276	NA
chr1	154568284	154568373	89	*	Promoter (<=1kb)	1	154567835	154576597	8763	1	1141	ENST00000637900.1	450	ENSG00000160716	CHRNB2	cholinergic receptor nicotinic beta 2 subunit	14.0972	-1.27198	0.643544	-1.97652	0.0480963	NA
chr5	141881088	141881341	253	*	Promoter (1-2kb)	5	141868954	141879246	10293	2	5097	ENST00000514773.1	-1843	ENSG00000156453	PCDH1	protocadherin 1	138.995	-1.26955	0.277738	-4.57102	4.85352e-06	0.000451178
chr14	21652363	21652634	271	*	Promoter (1-2kb)	14	21653835	21667642	13808	1	26686	ENST00000641524.1	-1201	ENSG00000221977	OR4E2	olfactory receptor family 4 subfamily E member 2	51.2737	-1.2683	0.420689	-3.01482	0.00257135	0.0418466
chr16	71442240	71442371	131	*	Promoter (<=1kb)	16	71429980	71442054	12075	2	102723796	ENST00000561754.4	-187	ENSG00000260734	TLE7	TLE family member 7	30.6354	-1.26644	0.440008	-2.87823	0.00399919	NA
chr15	88605343	88605346	3	*	Promoter (<=1kb)	15	88586774	88605110	18337	2	101929743	ENST00000560368.1	-234	ENSG00000249487	LINC01586	long intergenic non-protein coding RNA 1586	6.91248	-1.26551	0.922403	-1.37197	0.170073	NA
chr3	50095546	50095845	299	*	Promoter (1-2kb)	3	50093718	50108305	14588	1	10181	ENST00000395174.6	1829	ENSG00000003756	RBM5	RNA binding motif protein 5	42.0483	-1.26538	0.363467	-3.48143	0.000498749	NA
chr22	46619990	46620065	75	*	Promoter (<=1kb)	22	46620386	46679785	59400	1	23151	ENST00000406902.6	-321	ENSG00000075240	GRAMD4	GRAM domain containing 4	18.3643	-1.26193	0.555194	-2.27295	0.0230295	NA
chr6	73363203	73363321	118	*	Promoter (<=1kb)	6	73362658	73364171	1514	1	154288	ENST00000370367.4	546	ENSG00000203908	KHDC3L	KH domain containing 3 like, subcortical maternal complex member	22.1861	-1.26156	0.503484	-2.50565	0.0122226	NA
chr3	80770671	80770734	63	*	Promoter (<=1kb)	3	80770657	80789385	18729	1	105377175	ENST00000654830.1	15	ENSG00000242781	LINC02050	long intergenic non-protein coding RNA 2050	16.6623	-1.26101	0.593148	-2.12596	0.0335067	NA
chr5	177389947	177390097	150	*	Promoter (<=1kb)	5	177389647	177398840	9194	1	6569	ENST00000513614.1	301	ENSG00000131183	SLC34A1	solute carrier family 34 member 1	46.7695	-1.25939	0.351052	-3.58749	0.000333875	0.0112434
chr17	35880180	35880393	213	*	Promoter (<=1kb)	17	35871491	35880360	8870	2	6352	ENST00000605140.6	0	ENSG00000271503	CCL5	C-C motif chemokine ligand 5	37.9566	-1.2584	0.39571	-3.18012	0.00147214	NA
chr2	218287850	218288013	163	*	Promoter (<=1kb)	2	218278536	218287303	8768	2	64114	ENST00000418569.5	-548	ENSG00000135926	TMBIM1	transmembrane BAX inhibitor motif containing 1	105.475	-1.2572	0.247645	-5.07662	3.84212e-07	5.63307e-05
chr17	9162677	9162963	286	*	Promoter (<=1kb)	17	9162935	9183676	20742	1	9423	ENST00000436734.1	0	ENSG00000065320	NTN1	netrin 1	43.0744	-1.2567	0.366773	-3.42636	0.000611734	0.0171054
chr1	148889611	148889705	94	*	Promoter (<=1kb)	1	148889645	148993882	104238	1	9659	ENST00000369351.7	0	ENSG00000178104	PDE4DIP	phosphodiesterase 4D interacting protein	15.1192	-1.25606	0.597447	-2.10237	0.0355209	NA
chr5	96741950	96742220	270	*	Promoter (<=1kb)	5	96742195	96750621	8427	1	831	ENST00000509259.5	0	ENSG00000153113	CAST	calpastatin	39.7742	-1.25349	0.400405	-3.13056	0.00174473	NA
chr1	145168150	145168391	241	*	Promoter (<=1kb)	1	145164099	145168712	4614	2	103091866	ENST00000578899.5	321	ENSG00000263590	LINC01145	long intergenic non-protein coding RNA 1145	32.9005	-1.25319	0.415684	-3.01477	0.00257178	NA
chr19	6444001	6444232	231	*	Promoter (<=1kb)	19	6436421	6444279	7859	2	79085	ENST00000601760.1	47	ENSG00000125648	SLC25A23	solute carrier family 25 member 23	35.2451	-1.25288	0.418738	-2.99204	0.00277122	NA
chr8	11467942	11468022	80	*	Promoter (<=1kb)	8	11444138	11467594	23457	2	83648	ENST00000531804.5	-349	ENSG00000154319	FAM167A	family with sequence similarity 167 member A	21.2386	-1.25081	0.512558	-2.44034	0.0146734	NA
chr10	80163748	80164349	601	*	Promoter (1-2kb)	10	80155640	80162012	6373	2	311	ENST00000447489.1	-1737	ENSG00000122359	ANXA11	annexin A11	199.707	-1.25039	0.179594	-6.96234	3.34676e-12	2.19171e-09
chr17	20086623	20086685	62	*	Promoter (<=1kb)	17	20087021	20239427	152407	1	92521	ENST00000395529.7	-336	ENSG00000128487	SPECC1	sperm antigen with calponin homology and coiled-coil domains 1	15.3239	-1.2495	0.624113	-2.00204	0.045281	NA
chr17	76643376	76643927	551	*	Promoter (<=1kb)	17	76624761	76643786	19026	2	55808	ENST00000592042.5	0	ENSG00000070526	ST6GALNAC1	ST6 N-acetylgalactosaminide alpha-2,6-sialyltransferase 1	117.902	-1.24931	0.237182	-5.26731	1.38434e-07	2.39832e-05
chr15	31216274	31216907	633	*	Promoter (<=1kb)	15	31216021	31224445	8425	1	102725022	ENST00000557928.1	254	NA	LINC02352	long intergenic non-protein coding RNA 2352	225.633	-1.24686	0.191335	-6.51665	7.18972e-11	3.44514e-08
chr12	52927192	52927716	524	*	Promoter (<=1kb)	12	52897297	52926469	29173	2	3856	ENST00000552150.5	-724	ENSG00000170421	KRT8	keratin 8	157.261	-1.24668	0.199896	-6.23661	4.47146e-10	1.65749e-07
chr15	78798567	78798750	183	*	Promoter (1-2kb)	15	78770626	78800544	29919	2	11173	ENST00000565793.5	1794	ENSG00000136378	ADAMTS7	ADAM metallopeptidase with thrombospondin type 1 motif 7	77.617	-1.24563	0.32543	-3.82765	0.000129373	0.00577921
chr17	78202786	78202967	181	*	Promoter (<=1kb)	17	78202721	78207052	4332	1	125061	ENST00000585419.1	66	ENSG00000183077	AFMID	arylformamidase	36.5636	-1.24362	0.405463	-3.06716	0.002161	NA
chr1	11990431	11990686	255	*	Promoter (1-2kb)	1	11992252	12013500	21249	1	9927	ENST00000675483.1	-1566	ENSG00000116688	MFN2	mitofusin 2	33.5952	-1.24328	0.435037	-2.85787	0.00426496	NA
chr6	41938160	41938643	483	*	Promoter (<=1kb)	6	41936649	41938266	1618	2	896	ENST00000506555.5	0	ENSG00000112576	CCND3	cyclin D3	217.202	-1.24029	0.186787	-6.64011	3.13445e-11	1.70111e-08
chr10	73017961	73018289	328	*	Promoter (1-2kb)	10	73009640	73016861	7222	2	5033	ENST00000464310.2	-1101	ENSG00000122884	P4HA1	prolyl 4-hydroxylase subunit alpha 1	51.3672	-1.23319	0.337338	-3.65565	0.000256534	0.00937483
chr20	36207516	36207678	162	*	Promoter (<=1kb)	20	36207451	36212376	4926	1	2036	ENST00000479336.1	66	ENSG00000088367	EPB41L1	erythrocyte membrane protein band 4.1 like 1	33.3325	-1.23114	0.410266	-3.00083	0.00269246	NA
chr2	232568206	232568503	297	*	Promoter (1-2kb)	2	232566944	232569833	2890	1	9470	ENST00000478878.1	1263	ENSG00000135930	EIF4E2	eukaryotic translation initiation factor 4E family member 2	104.494	-1.23045	0.249717	-4.9274	8.33298e-07	0.000105894
chr10	77350666	77351030	364	*	Promoter (<=1kb)	10	77350851	77357574	6724	1	101929286	ENST00000675005.1	0	NA	KCNMA1-AS3	KCNMA1 antisense RNA 3	188.922	-1.22622	0.22305	-5.49752	3.85178e-08	8.20042e-06
chr11	50298515	50298661	146	*	Promoter (<=1kb)	11	50298579	50302128	3550	1	105369150	ENST00000525654.1	0	NA	LINC02750	long intergenic non-protein coding RNA 2750	23.3265	-1.22598	0.487629	-2.51417	0.0119312	NA
chr6	32046856	32047441	585	*	Promoter (<=1kb)	6	32041155	32046607	5453	2	7148	ENST00000490077.5	-250	ENSG00000168477	TNXB	tenascin XB	242.353	-1.22585	0.175137	-6.99936	2.57132e-12	1.80417e-09
chr10	70283109	70283354	245	*	Promoter (<=1kb)	10	70247329	70284004	36676	2	64106	ENST00000277942.7	650	ENSG00000148734	NPFFR1	neuropeptide FF receptor 1	31.6198	-1.22438	0.43017	-2.84627	0.00442346	NA
chr2	17799646	17799693	47	*	Promoter (<=1kb)	2	17797565	17800158	2594	2	105373449	ENST00000489535.2	465	NA	LOC105373449	uncharacterized LOC105373449	16.7942	-1.22289	0.590886	-2.06959	0.0384904	NA
chr1	15407273	15407499	226	*	Promoter (<=1kb)	1	15403025	15407882	4858	2	101927441	ENST00000667833.1	383	NA	EFHD2-AS1	EFHD2 antisense RNA 1	100.613	-1.22219	0.254579	-4.80081	1.58024e-06	0.000179563
chr1	225737199	225737460	261	*	Promoter (1-2kb)	1	225735855	225745604	9750	1	107985352	ENST00000665855.1	1345	NA	LOC107985352	uncharacterized LOC107985352	83.1733	-1.21848	0.273219	-4.45971	8.20688e-06	0.000691398
chr4	8181847	8182118	271	*	Promoter (<=1kb)	4	8182072	8212829	30758	1	54436	ENST00000510763.5	0	ENSG00000125089	SH3TC1	SH3 domain and tetratricopeptide repeats 1	82.064	-1.21675	0.268998	-4.52327	6.08919e-06	0.000544761
chr14	94027504	94027729	225	*	Promoter (1-2kb)	14	94026378	94039411	13034	1	78990	ENST00000553723.1	1127	ENSG00000089723	OTUB2	OTU deubiquitinase, ubiquitin aldehyde binding 2	97.5592	-1.21497	0.277661	-4.37575	1.21016e-05	0.000948724
chr6	5456825	5457448	623	*	Promoter (<=1kb)	6	5451683	5458033	6351	2	101927972	ENST00000602674.1	585	ENSG00000269985	LOC101927972	uncharacterized LOC101927972	187.777	-1.21388	0.24022	-5.05319	4.3449e-07	6.19454e-05
chr3	11570835	11571103	268	*	Promoter (1-2kb)	3	11558470	11568924	10455	2	9686	ENST00000424529.6	-1912	ENSG00000144560	VGLL4	vestigial like family member 4	155.728	-1.21306	0.211539	-5.73447	9.782e-09	2.48293e-06
chr16	28390455	28390799	344	*	Promoter (<=1kb)	16	28390982	28391051	70	2	102465520	ENST00000613016.1	252	ENSG00000275429	MIR6862-1	microRNA 6862-1	43.1669	-1.21147	0.396866	-3.0526	0.00226869	0.0386634
chr19	15813751	15813821	70	*	Promoter (1-2kb)	19	15804549	15815664	11116	2	26539	ENST00000641419.1	1843	ENSG00000186723	OR10H1	olfactory receptor family 10 subfamily H member 1	15.6069	-1.20974	0.60211	-2.00916	0.0445197	NA
chr15	80777177	80777427	250	*	Promoter (1-2kb)	15	80779343	80951776	172434	1	57214	ENST00000220244.7	-1916	ENSG00000103888	CEMIP	cell migration inducing hyaluronidase 1	100.902	-1.2088	0.272199	-4.44085	8.96049e-06	0.000736947
chr19	35843556	35843733	177	*	Promoter (1-2kb)	19	35843498	35845510	2013	2	4868	ENST00000585400.1	1777	ENSG00000161270	NPHS1	NPHS1 adhesion molecule, nephrin	36.5577	-1.20797	0.416464	-2.90054	0.00372518	NA
chr6	10434236	10434365	129	*	Promoter (<=1kb)	6	10434316	10452247	17932	1	106660610	ENST00000449333.1	0	ENSG00000229401	MIR5689HG	MIR5689 host gene	27.0825	-1.20657	0.456541	-2.64285	0.00822112	NA
chr20	41989987	41990695	708	*	Promoter (<=1kb)	20	41991140	42063969	72830	1	101927182	ENST00000431589.1	-445	NA	LOC101927182	uncharacterized LOC101927182	396.902	-1.20614	0.177038	-6.8129	9.56503e-12	5.76431e-09
chr6	130979083	130979259	176	*	Promoter (<=1kb)	6	130956104	130978796	22693	2	2037	ENST00000531356.1	-288	ENSG00000079819	EPB41L2	erythrocyte membrane protein band 4.1 like 2	40.3667	-1.20266	0.388323	-3.09707	0.00195447	NA
chr11	35214792	35215221	429	*	Promoter (<=1kb)	11	35214666	35229446	14781	1	960	ENST00000527326.1	127	ENSG00000026508	CD44	CD44 molecule (Indian blood group)	95.6201	-1.20246	0.276926	-4.34215	1.41094e-05	0.00105639
chr9	136745868	136746177	309	*	Promoter (<=1kb)	9	136744017	136746022	2006	2	158062	ENST00000476567.1	0	ENSG00000267206	LCN6	lipocalin 6	135.999	-1.20028	0.241332	-4.97355	6.57372e-07	8.69102e-05
chr7	96219350	96219792	442	*	Promoter (<=1kb)	7	96219662	96219756	95	2	693176	ENST00000385290.1	0	ENSG00000208025	MIR591	microRNA 591	118.326	-1.20017	0.297157	-4.03885	5.37149e-05	0.00297769
chr15	82699366	82699497	131	*	Promoter (<=1kb)	15	82680897	82699240	18344	2	8120	ENST00000541693.5	-127	ENSG00000103723	AP3B2	adaptor related protein complex 3 subunit beta 2	16.8253	-1.19982	0.590523	-2.03179	0.0421753	NA
chr12	130993701	130993866	165	*	Promoter (<=1kb)	12	130990161	130993967	3807	2	105755954	ENST00000536673.1	101	NA	ADGRD1-AS1	ADGRD1 antisense RNA 1	30.3602	-1.19951	0.442233	-2.71239	0.00668009	NA
chr2	218357701	218357708	7	*	Promoter (<=1kb)	2	218357703	218368099	10397	1	375307	ENST00000481940.1	0	ENSG00000158428	CATIP	ciliogenesis associated TTC17 interacting protein	3.96509	-1.19857	1.14179	-1.04973	0.293843	NA
chr13	51950840	51951080	240	*	Promoter (1-2kb)	13	51940046	51949706	9661	2	540	ENST00000674126.1	-1135	ENSG00000123191	ATP7B	ATPase copper transporting beta	118.982	-1.19817	0.249121	-4.80959	1.51242e-06	0.000174578
chr8	130427893	130428173	280	*	Promoter (<=1kb)	8	130180867	130427802	246936	2	50807	ENST00000520927.5	-92	ENSG00000153317	ASAP1	ArfGAP with SH3 domain, ankyrin repeat and PH domain 1	58.9113	-1.1975	0.330848	-3.61947	0.000295202	0.0103012
chr5	78490991	78491521	530	*	Promoter (<=1kb)	5	78488812	78491306	2495	2	10184	ENST00000502722.1	0	ENSG00000145685	LHFPL2	LHFPL tetraspan subfamily member 2	224.965	-1.19747	0.185171	-6.46683	1.0008e-10	4.59392e-08
chr12	56996860	56997175	315	*	Promoter (<=1kb)	12	56996259	56998441	2183	1	11318	ENST00000556850.1	602	ENSG00000166856	GPR182	G protein-coupled receptor 182	118.216	-1.1973	0.237206	-5.0475	4.47623e-07	6.36331e-05
chr1	161594113	161594202	89	*	Promoter (<=1kb)	1	161594835	161605099	10265	1	9103	ENST00000507374.5	-633	NA	FCGR2C	Fc fragment of IgG receptor IIc (gene/pseudogene)	23.8829	-1.1964	0.505783	-2.36544	0.0180089	NA
chr17	16970644	16970998	354	*	Promoter (1-2kb)	17	16940506	16972078	31573	2	23495	ENST00000581616.2	1080	ENSG00000240505	TNFRSF13B	TNF receptor superfamily member 13B	47.992	-1.19563	0.367815	-3.25063	0.00115148	0.0255697
chr2	27496366	27497379	1013	*	Promoter (<=1kb)	2	27496839	27523684	26846	1	2646	ENST00000264717.7	0	ENSG00000084734	GCKR	glucokinase regulator	473.219	-1.19359	0.31622	-3.77456	0.000160292	0.00675869
chr7	26488111	26488248	137	*	Promoter (<=1kb)	7	26487141	26494350	7210	1	441204	ENST00000665801.1	971	ENSG00000214870	LOC441204	uncharacterized LOC441204	26.5054	-1.1928	0.461378	-2.58531	0.00972928	NA
chr22	32803163	32803312	149	*	Promoter (1-2kb)	22	32801705	32863041	61337	1	7078	ENST00000266085.7	1459	ENSG00000100234	TIMP3	TIMP metallopeptidase inhibitor 3	25.2372	-1.19273	0.484641	-2.46105	0.013853	NA
chr21	44920193	44920391	198	*	Promoter (<=1kb)	21	44885953	44920855	34903	2	3689	ENST00000397854.7	464	ENSG00000160255	ITGB2	integrin subunit beta 2	39.2324	-1.19138	0.398266	-2.99141	0.00277691	NA
chr22	50074273	50074478	205	*	Promoter (<=1kb)	22	50070542	50074684	4143	2	23209	ENST00000470008.1	206	ENSG00000100427	MLC1	modulator of VRAC current 1	37.1366	-1.19074	0.390769	-3.04718	0.00230997	NA
chr5	458891	459095	204	*	Promoter (1-2kb)	5	457006	459580	2575	1	11336	ENST00000510028.1	1886	ENSG00000180104	EXOC3	exocyst complex component 3	51.8473	-1.19014	0.353432	-3.36738	0.000758854	0.0196848
chr9	93558312	93558567	255	*	Promoter (1-2kb)	9	93556452	93564371	7920	1	23196	ENST00000652239.1	1861	ENSG00000048828	FAM120A	family with sequence similarity 120A	35.162	-1.18889	0.400376	-2.96944	0.00298341	NA
chr19	17772454	17772707	253	*	Promoter (1-2kb)	19	17770843	17774695	3853	1	23149	ENST00000600393.1	1612	ENSG00000130475	FCHO1	FCH and mu domain containing endocytic adaptor 1	38.1313	-1.18673	0.403873	-2.93838	0.00329928	NA
chr2	218357363	218357649	286	*	Promoter (<=1kb)	2	218357485	218360630	3146	1	375307	ENST00000495773.1	0	ENSG00000158428	CATIP	ciliogenesis associated TTC17 interacting protein	33.4736	-1.18429	0.43942	-2.69512	0.00703632	NA
chr14	55796616	55796902	286	*	Promoter (<=1kb)	14	55781132	55796731	15600	2	645687	ENST00000647781.1	0	ENSG00000258791	LINC00520	long intergenic non-protein coding RNA 520	90.928	-1.18157	0.266157	-4.43937	9.02244e-06	0.00074042
chr6	130978831	130978997	166	*	Promoter (<=1kb)	6	130956104	130978796	22693	2	2037	ENST00000531356.1	-36	ENSG00000079819	EPB41L2	erythrocyte membrane protein band 4.1 like 2	24.8441	-1.18148	0.468321	-2.5228	0.0116426	NA
chr19	6821589	6821763	174	*	Promoter (<=1kb)	19	6822437	6827104	4668	1	7409	ENST00000594082.1	-674	ENSG00000141968	VAV1	vav guanine nucleotide exchange factor 1	22.538	-1.17594	0.519648	-2.26296	0.0236384	NA
chr20	3733952	3734055	103	*	Promoter (1-2kb)	20	3732711	3753111	20401	1	116835	ENST00000399701.1	1242	ENSG00000132622	HSPA12B	heat shock protein family A (Hsp70) member 12B	22.5683	-1.17564	0.518022	-2.26947	0.0232395	NA
chr15	78264260	78264265	5	*	Promoter (<=1kb)	15	78257545	78264156	6612	2	105370911	ENST00000558971.1	-105	NA	DNAJA4-DT	DNAJA4 divergent transcript	7.87628	-1.17444	0.831138	-1.41305	0.157642	NA
chr17	20895866	20895901	35	*	Promoter (<=1kb)	17	20863478	20895953	32476	2	339184	ENST00000648089.1	52	ENSG00000205212	CCDC144NL	CCDC144A N-terminal pseudogene	11.0752	-1.17423	0.736853	-1.59358	0.111031	NA
chr6	112193028	112193161	133	*	Promoter (1-2kb)	6	112179735	112191811	12077	2	3910	ENST00000521732.5	-1218	ENSG00000112769	LAMA4	laminin subunit alpha 4	15.9213	-1.16959	0.600708	-1.94702	0.0515321	NA
chr19	15640076	15640203	127	*	Promoter (<=1kb)	19	15640897	15659759	18863	1	4051	ENST00000592279.6	-694	ENSG00000186529	CYP4F3	cytochrome P450 family 4 subfamily F member 3	27.1218	-1.16953	0.45278	-2.58299	0.00979471	NA
chr22	43275559	43276056	497	*	Promoter (<=1kb)	22	43275955	43283830	7876	1	101927447	ENST00000458463.1	0	ENSG00000203527	SCUBE1-AS1	SCUBE1 antisense RNA 1	167.594	-1.16887	0.248541	-4.70294	2.5644e-06	0.000272328
chr17	1505437	1505620	183	*	Promoter (1-2kb)	17	1497758	1507020	9263	2	51763	ENST00000495339.1	1400	ENSG00000132376	INPP5K	inositol polyphosphate-5-phosphatase K	57.1213	-1.1684	0.317902	-3.67537	0.00023751	0.00888454
chr16	81189302	81189577	275	*	Promoter (<=1kb)	16	81130081	81188998	58918	2	114780	ENST00000299598.11	-305	ENSG00000166473	PKD1L2	polycystin 1 like 2 (gene/pseudogene)	37.8361	-1.16717	0.39207	-2.97694	0.00291142	NA
chr1	12398454	12398628	174	*	Promoter (1-2kb)	1	12400310	12403948	3639	1	55187	ENST00000466732.2	-1682	ENSG00000048707	VPS13D	vacuolar protein sorting 13 homolog D	25.0375	-1.16675	0.473814	-2.46246	0.0137986	NA
chr19	56156666	56157166	500	*	Promoter (<=1kb)	19	56157309	56159967	2659	1	55311	ENST00000592171.1	-143	ENSG00000167685	ZNF444	zinc finger protein 444	116.319	-1.1646	0.227943	-5.10919	3.23548e-07	4.93516e-05
chr2	241999286	241999527	241	*	Promoter (1-2kb)	2	242001209	242006013	4805	1	285097	ENST00000625132.1	-1682	ENSG00000280119	LOC285097	uncharacterized FLJ38379	39.2437	-1.16384	0.37819	-3.07739	0.00208821	NA
chr3	195726017	195726093	76	*	Promoter (<=1kb)	3	195726181	195730122	3942	1	200958	ENST00000498018.1	-88	ENSG00000176945	MUC20	mucin 20, cell surface associated	22.8793	-1.16349	0.499144	-2.33098	0.0197546	NA
chr17	1071446	1071690	244	*	Promoter (1-2kb)	17	1050554	1069983	19430	2	29	ENST00000574544.1	-1464	ENSG00000159842	ABR	ABR activator of RhoGEF and GTPase	38.9526	-1.16246	0.390063	-2.98019	0.00288072	NA
chr14	23137745	23138137	392	*	Promoter (<=1kb)	14	23129261	23138019	8759	2	23428	ENST00000528806.5	0	ENSG00000092068	SLC7A8	solute carrier family 7 member 8	54.9141	-1.16193	0.320533	-3.62498	0.000288989	0.010165
chr2	150472494	150472870	376	*	Promoter (<=1kb)	2	150470141	150471960	1820	2	390	ENST00000473639.1	-535	ENSG00000115963	RND3	Rho family GTPase 3	158.611	-1.15922	0.252047	-4.59923	4.2406e-06	0.000406003
chr16	57104914	57105185	271	*	Promoter (<=1kb)	16	57106051	57113352	7302	1	221184	ENST00000566259.1	-866	ENSG00000140848	CPNE2	copine 2	44.9226	-1.15734	0.358769	-3.22586	0.00125593	0.0270245
chr19	10631734	10632264	530	*	Promoter (<=1kb)	19	10631706	10637702	5997	1	57153	ENST00000588393.5	29	ENSG00000129353	SLC44A2	solute carrier family 44 member 2	134.886	-1.15403	0.210783	-5.47497	4.37582e-08	9.04813e-06
chr1	162412147	162412404	257	*	Promoter (<=1kb)	1	162402477	162412138	9662	2	117157	ENST00000493550.1	-10	ENSG00000198574	SH2D1B	SH2 domain containing 1B	33.9821	-1.15257	0.406658	-2.83426	0.00459322	NA
chr22	23815861	23815996	135	*	Promoter (<=1kb)	22	23814991	23833587	18597	1	6598	ENST00000477836.2	871	ENSG00000099956	SMARCB1	SWI/SNF related, matrix associated, actin dependent regulator of chromatin, subfamily b, member 1	25.9493	-1.15123	0.475176	-2.42275	0.0154036	NA
chr22	24243606	24243843	237	*	Promoter (1-2kb)	22	24219660	24245059	25400	2	2687	ENST00000398292.3	1216	ENSG00000099998	GGT5	gamma-glutamyltransferase 5	75.3593	-1.15109	0.284652	-4.04384	5.25828e-05	0.00293314
chr19	29716418	29716530	112	*	Promoter (<=1kb)	19	29702789	29715789	13001	2	83636	ENST00000614091.5	-630	ENSG00000131943	C19orf12	chromosome 19 open reading frame 12	19.8284	-1.14878	0.525578	-2.18574	0.0288348	NA
chr22	41781573	41781819	246	*	Promoter (<=1kb)	22	41781735	41799456	17722	1	150365	ENST00000403492.5	0	ENSG00000167077	MEI1	meiotic double-stranded break formation protein 1	40.6783	-1.14798	0.370873	-3.09536	0.00196576	NA
chr15	89041401	89041507	106	*	Promoter (<=1kb)	15	89041274	89077215	35942	1	102724566	ENST00000668304.1	128	NA	CARMAL	coronary artery disease region linked MFGE8 regulatory lncRNA	11.0305	-1.14631	0.736042	-1.5574	0.119376	NA
chr19	1585001	1585036	35	*	Promoter (<=1kb)	19	1578012	1584954	6943	2	53615	ENST00000590830.5	-48	ENSG00000071655	MBD3	methyl-CpG binding domain protein 3	13.6482	-1.14485	0.678286	-1.68785	0.0914397	NA
chr14	104956468	104956817	349	*	Promoter (1-2kb)	14	104953537	104955402	1866	2	113146	ENST00000555544.1	-1067	ENSG00000185567	AHNAK2	AHNAK nucleoprotein 2	56.2436	-1.1445	0.346731	-3.30083	0.000964	0.0228565
chr12	126727218	126727301	83	*	Promoter (<=1kb)	12	126726600	126745528	18929	1	100507206	ENST00000539315.1	619	ENSG00000189238	LINC00943	long intergenic non-protein coding RNA 943	17.532	-1.14314	0.591888	-1.93135	0.0534401	NA
chr1	110383389	110383591	202	*	Promoter (<=1kb)	1	110382819	110418362	35544	1	101410535	ENST00000590413.5	571	NA	LAMTOR5-AS1	LAMTOR5 antisense RNA 1	55.3656	-1.14282	0.321948	-3.54971	0.000385663	0.0123966
chr1	236754630	236755040	410	*	Promoter (<=1kb)	1	236754898	236763035	8138	1	88	ENST00000684122.1	0	ENSG00000077522	ACTN2	actinin alpha 2	48.3466	-1.14107	0.359511	-3.17394	0.00150383	0.0303104
chr2	196719180	196719282	102	*	Promoter (<=1kb)	2	196719279	196728011	8733	1	284992	ENST00000463826.5	0	ENSG00000144395	CCDC150	coiled-coil domain containing 150	21.7717	-1.14097	0.504766	-2.2604	0.0237967	NA
chr19	43799785	43800321	536	*	Promoter (<=1kb)	19	43796959	43800029	3071	2	284348	ENST00000594013.5	0	ENSG00000159871	LYPD5	LY6/PLAUR domain containing 5	145.005	-1.13931	0.211674	-5.38237	7.35114e-08	1.41035e-05
chr8	48735552	48735569	17	*	Promoter (<=1kb)	8	48729764	48735311	5548	2	79645	ENST00000521721.1	-242	ENSG00000034239	EFCAB1	EF-hand calcium binding domain 1	3.23362	-1.1387	1.27237	-0.894943	0.370818	NA
chr17	81561645	81561874	229	*	Promoter (<=1kb)	17	81559014	81560889	1876	2	55666	ENST00000574964.1	-757	ENSG00000182446	NPLOC4	NPL4 homolog, ubiquitin recognition factor	68.8828	-1.13782	0.296539	-3.83699	0.000124551	0.00562358
chr19	50771528	50771678	150	*	Promoter (1-2kb)	19	50770464	50771732	1269	1	2854	ENST00000270590.4	1065	ENSG00000142511	GPR32	G protein-coupled receptor 32	25.05	-1.13639	0.473537	-2.3998	0.0164042	NA
chr17	73506003	73506085	82	*	Promoter (1-2kb)	17	73504340	73507594	3255	2	54549	ENST00000585283.1	1509	ENSG00000069188	SDK2	sidekick cell adhesion molecule 2	24.1794	-1.13634	0.485981	-2.33824	0.0193748	NA
chr6	109237102	109237330	228	*	Promoter (<=1kb)	6	109236614	109271014	34401	1	221262	ENST00000453496.2	489	ENSG00000203799	CCDC162P	coiled-coil domain containing 162, pseudogene	41.8318	-1.1356	0.366669	-3.09708	0.00195435	NA
chr1	48775924	48776131	207	*	Promoter (<=1kb)	1	48761048	48776735	15688	2	79656	ENST00000489956.1	604	ENSG00000162373	BEND5	BEN domain containing 5	32.8166	-1.13322	0.410679	-2.75938	0.00579105	NA
chr2	3500420	3500793	373	*	Promoter (<=1kb)	2	3498661	3500816	2156	2	55256	ENST00000415131.1	23	ENSG00000182551	ADI1	acireductone dioxygenase 1	50.3867	-1.13267	0.372672	-3.03932	0.00237115	0.0397107
chr6	656539	656754	215	*	Promoter (<=1kb)	6	655939	656963	1025	2	135458	ENST00000380907.2	209	ENSG00000188996	HUS1B	HUS1 checkpoint clamp component B	28.2492	-1.13225	0.454091	-2.49344	0.0126513	NA
chr5	67196711	67197231	520	*	Promoter (<=1kb)	5	67179613	67196799	17187	2	4064	ENST00000256447.5	0	ENSG00000134061	CD180	CD180 molecule	87.4743	-1.13079	0.287405	-3.93447	8.33792e-05	0.00417665
chr1	2550295	2550465	170	*	Promoter (1-2kb)	1	2550074	2551598	1525	2	115110	ENST00000448624.2	1133	NA	TNFRSF14-AS1	TNFRSF14 antisense RNA 1	107.601	-1.13079	0.235814	-4.79525	1.62474e-06	0.000183659
chr19	38494321	38494575	254	*	Promoter (1-2kb)	19	38496215	38565228	69014	1	6261	ENST00000594335.5	-1640	ENSG00000196218	RYR1	ryanodine receptor 1	44.0761	-1.13061	0.361616	-3.12654	0.00176879	0.0333315
chr19	3708436	3708477	41	*	Promoter (<=1kb)	19	3708503	3750810	42308	1	27134	ENST00000539908.6	-26	ENSG00000105289	TJP3	tight junction protein 3	14.297	-1.12866	0.611344	-1.8462	0.0648632	NA
chr9	127952111	127952650	539	*	Promoter (1-2kb)	9	127940883	127950722	9840	2	399665	ENST00000300434.3	-1390	ENSG00000167106	FAM102A	family with sequence similarity 102 member A	227.869	-1.12751	0.200027	-5.6368	1.73234e-08	4.09062e-06
chr14	32933137	32933330	193	*	Promoter (1-2kb)	14	32934396	33801103	866708	1	64067	ENST00000551634.6	-1066	ENSG00000151322	NPAS3	neuronal PAS domain protein 3	33.804	-1.12732	0.450161	-2.50426	0.0122706	NA
chr2	10080329	10080338	9	*	Promoter (<=1kb)	2	10056780	10080411	23632	2	192668	ENST00000381813.4	73	ENSG00000205795	CYS1	cystin 1	3.11594	-1.1259	1.30784	-0.860884	0.389302	NA
chr4	75902373	75902659	286	*	Promoter (<=1kb)	4	75859864	75902423	42560	2	5470	ENST00000511880.7	0	ENSG00000156194	PPEF2	protein phosphatase with EF-hand domain 2	35.9319	-1.12514	0.399725	-2.81479	0.00488088	NA
chr19	308150	308184	34	*	Promoter (<=1kb)	19	305573	308923	3351	2	54531	ENST00000619835.4	739	ENSG00000105556	MIER2	MIER family member 2	15.7044	-1.12485	0.611755	-1.83873	0.0659545	NA
chr6	112193199	112193397	198	*	Promoter (1-2kb)	6	112179735	112191811	12077	2	3910	ENST00000521732.5	-1389	ENSG00000112769	LAMA4	laminin subunit alpha 4	38.7292	-1.12408	0.377424	-2.9783	0.00289856	NA
chr22	38474403	38474567	164	*	Promoter (<=1kb)	22	38474329	38482922	8594	1	11015	ENST00000471268.1	75	ENSG00000100196	KDELR3	KDEL endoplasmic reticulum protein retention receptor 3	27.7307	-1.12301	0.459961	-2.44154	0.0146249	NA
chr12	8932775	8932822	47	*	Promoter (<=1kb)	12	8933322	8937249	3928	1	1911	ENST00000535510.1	-500	ENSG00000111752	PHC1	polyhomeotic homolog 1	14.5784	-1.122	0.623096	-1.80068	0.071753	NA
chr2	87457202	87457401	199	*	Promoter (1-2kb)	2	87455845	87521504	65660	1	112597	ENST00000645138.1	1358	ENSG00000222041	CYTOR	cytoskeleton regulator RNA	110.002	-1.12109	0.252298	-4.44352	8.84995e-06	0.000732877
chr3	136928768	136928996	228	*	Promoter (<=1kb)	3	136928039	136946214	18176	1	4690	ENST00000496489.5	730	ENSG00000158092	NCK1	NCK adaptor protein 1	42.1184	-1.12044	0.402168	-2.78601	0.00533607	NA
chr15	72724143	72724293	150	*	Promoter (1-2kb)	15	72722830	72735645	12816	1	585	ENST00000562219.1	1314	ENSG00000140463	BBS4	Bardet-Biedl syndrome 4	23.9839	-1.11967	0.472568	-2.36932	0.0178206	NA
chr11	125881746	125881807	61	*	Promoter (1-2kb)	11	125883614	125900644	17031	1	219844	ENST00000356438.7	-1807	ENSG00000198331	HYLS1	HYLS1 centriolar and ciliogenesis associated	21.5534	-1.11853	0.548326	-2.0399	0.0413601	NA
chr6	52185458	52185540	82	*	Promoter (<=1kb)	6	52186375	52190638	4264	1	3605	ENST00000648244.1	-835	ENSG00000112115	IL17A	interleukin 17A	20.2473	-1.11694	0.517327	-2.15906	0.0308457	NA
chr2	11398827	11398977	150	*	Promoter (<=1kb)	2	11398873	11403080	4208	1	100874055	ENST00000432665.2	0	ENSG00000224177	LINC00570	long intergenic non-protein coding RNA 570	43.2539	-1.11641	0.393261	-2.83886	0.00452757	0.0586971
chr19	32644256	32644394	138	*	Promoter (<=1kb)	19	32643063	32643785	723	2	84079	ENST00000593232.5	-472	ENSG00000105186	ANKRD27	ankyrin repeat domain 27	23.9591	-1.11625	0.477011	-2.3401	0.0192785	NA
chr1	160883601	160883796	195	*	Promoter (1-2kb)	1	160881154	160882295	1142	2	55600	ENST00000464077.1	-1307	ENSG00000179914	ITLN1	intelectin 1	31.9401	-1.11458	0.424186	-2.62756	0.0085999	NA
chr1	61352830	61353292	462	*	Promoter (<=1kb)	1	61352450	61404226	51777	1	4774	ENST00000482020.1	381	ENSG00000162599	NFIA	nuclear factor I A	79.9561	-1.11432	0.286023	-3.8959	9.78364e-05	0.00470415
chr5	150619336	150619776	440	*	Promoter (1-2kb)	5	150617644	150652334	34691	1	11346	ENST00000522122.1	1693	ENSG00000171992	SYNPO	synaptopodin	313.87	-1.11422	0.161343	-6.90591	4.98836e-12	3.18189e-09
chr22	24224760	24225225	465	*	Promoter (<=1kb)	22	24219660	24226112	6453	2	2687	ENST00000425408.5	887	ENSG00000099998	GGT5	gamma-glutamyltransferase 5	61.0505	-1.1138	0.309567	-3.59794	0.00032075	0.0109325
chr19	17526740	17526932	192	*	Promoter (<=1kb)	19	17527238	17553639	26402	1	199786	ENST00000601861.5	-306	ENSG00000167483	NIBAN3	niban apoptosis regulator 3	31.8403	-1.11305	0.420603	-2.64632	0.00813738	NA
chr11	74932238	74932535	297	*	Promoter (<=1kb)	11	74931724	74936937	5214	1	107984352	ENST00000655254.1	515	NA	LOC107984352	uncharacterized LOC107984352	90.8102	-1.11237	0.261557	-4.2529	2.11019e-05	0.00144854
chr12	7924803	7925147	344	*	Promoter (1-2kb)	12	7921071	7923289	2219	2	6515	ENST00000469295.1	-1515	ENSG00000059804	SLC2A3	solute carrier family 2 member 3	49.3672	-1.1107	0.340178	-3.26506	0.0010944	0.0247779
chr18	79864377	79864491	114	*	Promoter (<=1kb)	18	79863668	79899816	36149	1	26251	ENST00000316249.3	710	ENSG00000178342	KCNG2	potassium voltage-gated channel modifier subfamily G member 2	19.2425	-1.1107	0.550914	-2.01609	0.0437901	NA
chr7	130875970	130876031	61	*	Promoter (<=1kb)	7	130876747	130876810	64	2	407021	ENST00000362111.4	779	ENSG00000284032	MIR29A	microRNA 29a	15.026	-1.10746	0.604484	-1.83207	0.0669404	NA
chr5	65555326	65555457	131	*	Promoter (<=1kb)	5	65528993	65555271	26279	2	64105	ENST00000502997.5	-56	ENSG00000123219	CENPK	centromere protein K	38.5884	-1.10739	0.39838	-2.77972	0.00544056	NA
chr7	20785320	20785333	13	*	Promoter (1-2kb)	7	20782279	20786886	4608	2	221833	ENST00000418710.3	1553	ENSG00000164651	SP8	Sp8 transcription factor	5.37315	-1.10665	1.06992	-1.03433	0.300983	NA
chr7	844148	844442	294	*	Promoter (<=1kb)	7	843370	874899	31530	1	23353	ENST00000429178.5	779	ENSG00000164828	SUN1	Sad1 and UNC84 domain containing 1	40.5716	-1.10574	0.377748	-2.92718	0.00342055	NA
chr1	209651109	209651568	459	*	Promoter (<=1kb)	1	209614875	209651334	36460	2	3914	ENST00000391911.5	0	ENSG00000196878	LAMB3	laminin subunit beta 3	392.828	-1.10434	0.148764	-7.42345	1.14107e-13	1.12089e-10
chr17	50517370	50517452	82	*	Promoter (1-2kb)	17	50519410	50520221	812	1	84073	ENST00000468821.1	-1958	ENSG00000136449	MYCBPAP	MYCBP associated protein	19.5285	-1.10358	0.543277	-2.03134	0.0422207	NA
chr2	67261040	67261265	225	*	Promoter (<=1kb)	2	67261066	67289370	28305	1	102800447	ENST00000593336.3	0	NA	LINC01828	long intergenic non-protein coding RNA 1828	29.1905	-1.10342	0.444885	-2.48022	0.01313	NA
chr19	3600041	3600080	39	*	Promoter (<=1kb)	19	3597922	3600133	2212	2	6915	ENST00000587717.1	53	ENSG00000006638	TBXA2R	thromboxane A2 receptor	14.6914	-1.10136	0.634436	-1.73597	0.0825685	NA
chr10	48968131	48968623	492	*	Promoter (<=1kb)	10	48968984	48976959	7976	1	57705	ENST00000497480.1	-361	ENSG00000128815	WDFY4	WDFY family member 4	96.5417	-1.10086	0.247551	-4.44702	8.70694e-06	0.000725438
chr16	19474055	19474278	223	*	Promoter (<=1kb)	16	19474165	19481426	7262	1	79838	ENST00000572147.1	0	ENSG00000103534	TMC5	transmembrane channel like 5	34.8876	-1.09873	0.431626	-2.54556	0.0109104	NA
chr16	29887895	29888078	183	*	Promoter (<=1kb)	16	29876765	29888593	11829	2	26470	ENST00000563118.1	515	ENSG00000174938	SEZ6L2	seizure related 6 homolog like 2	28.1249	-1.09773	0.449231	-2.44358	0.0145425	NA
chr20	57244068	57244233	165	*	Promoter (<=1kb)	20	57202474	57244034	41561	2	655	ENST00000530870.1	-35	ENSG00000101144	BMP7	bone morphogenetic protein 7	30.16	-1.09702	0.43392	-2.52815	0.0114665	NA
chr17	41315508	41315665	157	*	Promoter (<=1kb)	17	41314912	41315710	799	2	83902	ENST00000334202.5	45	ENSG00000186860	KRTAP17-1	keratin associated protein 17-1	26.8556	-1.0931	0.463049	-2.36065	0.0182429	NA
chr5	151213861	151214510	649	*	Promoter (1-2kb)	5	151212150	151266880	54731	1	2760	ENST00000523466.5	1712	ENSG00000196743	GM2A	GM2 ganglioside activator	255.097	-1.09171	0.226188	-4.82657	1.38908e-06	0.000162248
chr8	142876952	142877172	220	*	Promoter (1-2kb)	8	142872357	142875797	3441	2	1584	ENST00000519285.5	-1156	ENSG00000160882	CYP11B1	cytochrome P450 family 11 subfamily B member 1	36.4902	-1.08897	0.405264	-2.68706	0.00720847	NA
chr20	29416458	29416659	201	*	Promoter (<=1kb)	20	29415264	29416911	1648	2	647476	ENST00000634243.1	252	NA	FRG2EP	FSHD region gene 2 family member E, pseudogene	39.0345	-1.08821	0.400026	-2.72034	0.00652145	NA
chr19	16143611	16143761	150	*	Promoter (<=1kb)	19	16143685	16154863	11179	1	84941	ENST00000586872.5	0	ENSG00000196684	HSH2D	hematopoietic SH2 domain containing	28.4148	-1.08749	0.451644	-2.40786	0.0160465	NA
chr5	151651904	151651973	69	*	Promoter (<=1kb)	5	151652275	151655449	3175	1	105378231	ENST00000564471.1	-302	ENSG00000260581	LOC105378231	uncharacterized LOC105378231	11.6218	-1.08656	0.720912	-1.5072	0.131759	NA
chr7	5333581	5333807	226	*	Promoter (<=1kb)	7	5324222	5332878	8657	2	84629	ENST00000455076.1	-704	ENSG00000182095	TNRC18	trinucleotide repeat containing 18	33.604	-1.08648	0.410203	-2.64863	0.00808181	NA
chr12	6361780	6362355	575	*	Promoter (<=1kb)	12	6354750	6362172	7423	2	6337	ENST00000541249.5	0	ENSG00000111319	SCNN1A	sodium channel epithelial 1 subunit alpha	207.117	-1.08362	0.196695	-5.50916	3.60554e-08	7.76701e-06
chr1	201786841	201787171	330	*	Promoter (<=1kb)	1	201786550	201803706	17157	1	89796	ENST00000477118.2	292	ENSG00000134369	NAV1	neuron navigator 1	87.4342	-1.08296	0.304591	-3.55547	0.000377307	0.012216
chr19	40198267	40198523	256	*	Promoter (<=1kb)	19	40198397	40209202	10806	1	4294	ENST00000594951.1	0	ENSG00000130758	MAP3K10	mitogen-activated protein kinase kinase kinase 10	42.8813	-1.08253	0.368179	-2.94021	0.00327985	0.0483977
chr7	43520808	43520992	184	*	Promoter (1-2kb)	7	43508728	43522542	13815	2	100506895	ENST00000436105.1	1550	ENSG00000231638	LUARIS	lncRNA upregulator of antiviral response interferon signaling	28.9628	-1.08227	0.455397	-2.37654	0.0174759	NA
chr16	57357941	57358050	109	*	Promoter (<=1kb)	16	57358783	57366189	7407	1	6367	ENST00000219235.5	-733	ENSG00000102962	CCL22	C-C motif chemokine ligand 22	25.0926	-1.08212	0.469209	-2.30626	0.0210959	NA
chr5	154892223	154892598	375	*	Promoter (<=1kb)	5	154891434	154892650	1217	2	25929	ENST00000522075.1	52	ENSG00000082516	GEMIN5	gem nuclear organelle associated protein 5	111.592	-1.08135	0.252969	-4.27463	1.91456e-05	0.00134239
chrX	136204615	136204933	318	*	Promoter (<=1kb)	23	136204721	136209954	5234	1	2273	ENST00000370674.3	0	ENSG00000022267	FHL1	four and a half LIM domains 1	114.466	-1.08074	0.240285	-4.49773	6.86815e-06	0.000599373
chr7	154064081	154064280	199	*	Promoter (<=1kb)	7	154055582	154063325	7744	2	101929998	ENST00000657267.1	-757	NA	LOC101929998	uncharacterized LOC101929998	34.0412	-1.08047	0.420225	-2.57117	0.0101355	NA
chr12	121508655	121508986	331	*	Promoter (<=1kb)	12	121429509	121509706	80198	2	84678	ENST00000542973.5	720	ENSG00000089094	KDM2B	lysine demethylase 2B	50.111	-1.08012	0.334512	-3.22895	0.00124247	0.0268521
chr17	19312394	19312544	150	*	Promoter (<=1kb)	17	19312912	19331973	19062	1	22905	ENST00000585097.1	-368	ENSG00000072134	EPN2	epsin 2	22.6947	-1.08012	0.49104	-2.19966	0.0278312	NA
chr19	39167073	39167405	332	*	Promoter (1-2kb)	19	39168611	39179406	10796	1	10298	ENST00000360442.7	-1206	ENSG00000130669	PAK4	p21 (RAC1) activated kinase 4	70.9584	-1.07992	0.288798	-3.73938	0.000184476	0.00750362
chr6	168301145	168301300	155	*	Promoter (<=1kb)	6	168298069	168302114	4046	2	105378138	ENST00000445442.2	814	NA	LOC105378138	uncharacterized LOC105378138	29.5908	-1.0785	0.445857	-2.41893	0.0155662	NA
chr6	4189563	4189713	150	*	Promoter (<=1kb)	6	4185479	4188950	3472	2	102724096	ENST00000427591.2	-614	NA	LOC102724096	uncharacterized LOC102724096	24.8249	-1.07844	0.482949	-2.23303	0.0255472	NA
chr4	190062688	190062960	272	*	Promoter (1-2kb)	4	190064502	190067864	3363	1	100419743	ENST00000630918.1	-1542	ENSG00000281591	DBET	D4Z4 binding element transcript	30.8711	-1.0782	0.418502	-2.57633	0.00998544	NA
chr22	32043495	32043721	226	*	Promoter (<=1kb)	22	32043261	32113029	69769	1	6523	ENST00000266088.9	235	ENSG00000100170	SLC5A1	solute carrier family 5 member 1	39.0705	-1.07706	0.376737	-2.85892	0.00425086	NA
chrX	341564	341714	150	*	Promoter (<=1kb)	23	334235	341711	7477	2	28227	ENST00000479438.6	0	ENSG00000167393	PPP2R3B	protein phosphatase 2 regulatory subunit B''beta	28.9911	-1.07578	0.449296	-2.39437	0.0166491	NA
chr9	128928264	128928399	135	*	Promoter (1-2kb)	9	128927046	128940709	13664	1	254295	ENST00000424503.1	1219	ENSG00000175287	PHYHD1	phytanoyl-CoA dioxygenase domain containing 1	18.3562	-1.07542	0.559779	-1.92115	0.0547128	NA
chr3	10533498	10533598	100	*	Promoter (<=1kb)	3	10324023	10534133	210111	2	491	ENST00000460129.5	535	ENSG00000157087	ATP2B2	ATPase plasma membrane Ca2+ transporting 2	22.305	-1.07469	0.499761	-2.1504	0.0315234	NA
chr2	27149000	27149258	258	*	Promoter (<=1kb)	2	27149004	27156974	7971	1	150921	ENST00000296096.6	0	ENSG00000163792	TCF23	transcription factor 23	44.3357	-1.07397	0.37015	-2.90144	0.00371453	0.0521034
chr16	81786214	81786255	41	*	Promoter (<=1kb)	16	81785990	81958020	172031	1	5336	ENST00000359376.7	225	ENSG00000197943	PLCG2	phospholipase C gamma 2	13.6153	-1.0731	0.625727	-1.71497	0.0863507	NA
chr14	72715436	72715563	127	*	Promoter (<=1kb)	14	72674022	72714504	40483	2	8110	ENST00000554594.1	-933	ENSG00000205683	DPF3	double PHD fingers 3	30.4284	-1.07305	0.434885	-2.46742	0.013609	NA
chr2	17815936	17816170	234	*	Promoter (<=1kb)	2	17816460	17817798	1339	1	343930	ENST00000281047.4	-290	ENSG00000151379	MSGN1	mesogenin 1	29.6898	-1.07276	0.432787	-2.47871	0.0131857	NA
chr6	150370291	150370367	76	*	Promoter (<=1kb)	6	150369977	150395532	25556	1	389434	ENST00000425615.3	315	ENSG00000009765	IYD	iodotyrosine deiodinase	19.4023	-1.07198	0.534186	-2.00676	0.0447748	NA
chr22	41280221	41280414	193	*	Promoter (1-2kb)	22	41264744	41281621	16878	2	5905	ENST00000452543.5	1207	ENSG00000100401	RANGAP1	Ran GTPase activating protein 1	31.1059	-1.07081	0.419515	-2.55251	0.0106951	NA
chr1	43920201	43920222	21	*	Promoter (1-2kb)	1	43919113	43931139	12027	1	6487	ENST00000495482.2	1089	ENSG00000126091	ST3GAL3	ST3 beta-galactoside alpha-2,3-sialyltransferase 3	11.9462	-1.07017	0.679049	-1.57599	0.115029	NA
chr19	39297811	39298067	256	*	Promoter (1-2kb)	19	39296407	39298673	2267	1	282618	ENST00000333625.3	1405	ENSG00000182393	IFNL1	interferon lambda 1	39.9949	-1.06912	0.376366	-2.84063	0.00450246	NA
chr17	42129131	42129477	346	*	Promoter (<=1kb)	17	42126523	42128759	2237	2	5878	ENST00000551338.1	-373	ENSG00000108774	RAB5C	RAB5C, member RAS oncogene family	94.7073	-1.06873	0.250509	-4.26624	1.98798e-05	0.00138106
chr9	83331849	83332125	276	*	Promoter (<=1kb)	9	83242990	83331961	88972	2	257019	ENST00000376434.5	0	ENSG00000172159	FRMD3	FERM domain containing 3	61.5802	-1.06624	0.334047	-3.19188	0.00141352	0.029085
chr15	40250064	40250290	226	*	Promoter (1-2kb)	15	40252190	40266006	13817	1	56924	ENST00000558106.5	-1900	ENSG00000137843	PAK6	p21 (RAC1) activated kinase 6	74.1761	-1.06557	0.277238	-3.84354	0.000121274	0.00551775
chr19	3752521	3752745	224	*	Promoter (<=1kb)	19	3751250	3751894	645	2	9546	ENST00000586991.1	-628	ENSG00000011132	APBA3	amyloid beta precursor protein binding family A member 3	39.7691	-1.06346	0.408539	-2.60308	0.00923914	NA
chr7	5408846	5409056	210	*	Promoter (1-2kb)	7	5389305	5407394	18090	2	84629	ENST00000434361.5	-1453	ENSG00000182095	TNRC18	trinucleotide repeat containing 18	48.6799	-1.0634	0.344218	-3.08933	0.00200609	0.0359436
chr1	44141148	44141247	99	*	Promoter (<=1kb)	1	44137821	44141631	3811	2	105378952	ENST00000634670.1	384	ENSG00000283039	KLF18	Kruppel like factor 18	22.2974	-1.06313	0.503797	-2.11023	0.0348385	NA
chr16	18385188	18385420	232	*	Promoter (<=1kb)	16	18383471	18385229	1759	2	110006322	ENST00000538166.1	0	NA	PKD1P5-LOC105376752	PKD1P5-LOC105376752 readthrough	35.3044	-1.06169	0.398834	-2.66197	0.00776838	NA
chr3	123682807	123683060	253	*	Promoter (<=1kb)	3	123666919	123682310	15392	2	4638	ENST00000511058.1	-498	ENSG00000065534	MYLK	myosin light chain kinase	55.9725	-1.05866	0.321192	-3.29605	0.000980555	0.0230765
chr17	81695507	81695725	218	*	Promoter (<=1kb)	17	81695681	81696383	703	1	9146	ENST00000571885.1	0	ENSG00000185359	HGS	hepatocyte growth factor-regulated tyrosine kinase substrate	48.4282	-1.05747	0.348969	-3.03027	0.00244339	0.0404451
chr16	89791437	89791563	126	*	Promoter (<=1kb)	16	89791044	89792011	968	2	2175	ENST00000563767.1	448	ENSG00000187741	FANCA	FA complementation group A	22.3937	-1.05719	0.531351	-1.98963	0.0466319	NA
chr3	15341218	15341324	106	*	Promoter (<=1kb)	3	15269843	15341237	71395	2	9467	ENST00000465894.6	0	ENSG00000131370	SH3BP5	SH3 domain binding protein 5	24.6226	-1.05691	0.512272	-2.06318	0.0390953	NA
chr5	178576958	178577061	103	*	Promoter (<=1kb)	5	178237476	178577549	340074	2	91522	ENST00000680889.1	488	ENSG00000050767	COL23A1	collagen type XXIII alpha 1 chain	23.2496	-1.05636	0.503039	-2.09996	0.0357323	NA
chr14	66495346	66495477	131	*	Promoter (1-2kb)	14	66496683	66498553	1871	1	440184	ENST00000436570.2	-1206	ENSG00000196553	CCDC196	coiled-coil domain containing 196	12.7504	-1.05633	0.684325	-1.54361	0.122683	NA
chr4	114599395	114599451	56	*	Promoter (<=1kb)	4	114598807	114678225	79419	1	7368	ENST00000310836.11	589	ENSG00000174607	UGT8	UDP glycosyltransferase 8	10.0652	-1.05541	0.735988	-1.434	0.151573	NA
chr10	81875603	81875624	21	*	Promoter (<=1kb)	10	81875341	82985605	1110265	1	10718	ENST00000404547.5	263	ENSG00000185737	NRG3	neuregulin 3	15.0511	-1.0548	0.614657	-1.71608	0.0861473	NA
chr3	165195989	165196199	210	*	Promoter (<=1kb)	3	165186720	165196384	9665	2	22865	ENST00000475390.2	185	ENSG00000121871	SLITRK3	SLIT and NTRK like family member 3	29.112	-1.0545	0.433797	-2.43085	0.0150635	NA
chr19	4311796	4312005	209	*	Promoter (<=1kb)	19	4311473	4323843	12371	1	79187	ENST00000598179.1	324	ENSG00000105255	FSD1	fibronectin type III and SPRY domain containing 1	37.1896	-1.05437	0.394186	-2.67481	0.00747716	NA
chr16	69838276	69838877	601	*	Promoter (<=1kb)	16	69838737	69888158	49422	1	11060	ENST00000563618.5	0	ENSG00000198373	WWP2	WW domain containing E3 ubiquitin protein ligase 2	235.571	-1.05289	0.179358	-5.87034	4.34901e-09	1.23828e-06
chr22	43036168	43036717	549	*	Promoter (1-2kb)	22	43038585	43052366	13782	1	100506679	ENST00000443063.1	-1868	ENSG00000230319	TTLL1-AS1	TTLL1 antisense RNA 1	365.363	-1.05225	0.139865	-7.52337	5.33839e-14	5.51996e-11
chr2	241933124	241933406	282	*	Promoter (<=1kb)	2	241933836	241966120	32285	1	101927289	ENST00000439601.1	-430	ENSG00000233806	LINC01237	long intergenic non-protein coding RNA 1237	43.0793	-1.05179	0.362768	-2.89936	0.00373926	0.0523459
chr12	57822444	57822672	228	*	Promoter (1-2kb)	12	57822891	57824543	1653	2	10106	ENST00000547169.5	1871	ENSG00000175215	CTDSP2	CTD small phosphatase 2	70.5132	-1.05146	0.296882	-3.54168	0.00039759	0.0126845
chr2	217277624	217278110	486	*	Promoter (<=1kb)	2	217278064	217307499	29436	1	105373877	ENST00000666326.1	0	NA	DIRC3-AS1	DIRC3 antisense RNA 1	497.854	-1.0513	0.481247	-2.18454	0.0289227	0.172002
chr1	1759325	1759408	83	*	Promoter (<=1kb)	1	1752471	1758575	6105	2	65220	ENST00000342348.9	-751	ENSG00000008130	NADK	NAD kinase	25.4011	-1.05094	0.505559	-2.07876	0.0376391	NA
chr8	17611089	17611270	181	*	Promoter (<=1kb)	8	17604667	17610269	5603	2	107986919	ENST00000660331.1	-821	NA	LOC107986919	uncharacterized LOC107986919	90.4053	-1.05065	0.28556	-3.67926	0.000233909	0.00879996
chr22	20735647	20735848	201	*	Promoter (<=1kb)	22	20707703	20734667	26965	2	5297	ENST00000477245.5	-981	ENSG00000241973	PI4KA	phosphatidylinositol 4-kinase alpha	30.8933	-1.04944	0.428317	-2.45014	0.0142801	NA
chr7	98224171	98224373	202	*	Promoter (<=1kb)	7	98217967	98223743	5777	2	25851	ENST00000474915.5	-429	ENSG00000205356	TECPR1	tectonin beta-propeller repeat containing 1	41.3578	-1.04849	0.383594	-2.73333	0.00626972	NA
chr6	73363595	73363745	150	*	Promoter (<=1kb)	6	73362658	73364171	1514	1	154288	ENST00000370367.4	938	ENSG00000203908	KHDC3L	KH domain containing 3 like, subcortical maternal complex member	28.317	-1.04798	0.45274	-2.31474	0.0206269	NA
chr19	4523780	4524056	276	*	Promoter (1-2kb)	19	4523909	4525849	1941	2	440503	ENST00000589728.1	1793	ENSG00000214456	PLIN5	perilipin 5	49.549	-1.04782	0.346246	-3.02622	0.00247631	0.0407865
chr17	78161302	78161416	114	*	Promoter (<=1kb)	17	78161040	78166135	5096	1	100141515	ENST00000586029.1	263	ENSG00000187997	C17orf99	chromosome 17 open reading frame 99	24.7226	-1.04723	0.497728	-2.10402	0.035377	NA
chr1	24108874	24109317	443	*	Promoter (<=1kb)	1	24081549	24108439	26891	2	127294	ENST00000475306.1	-436	ENSG00000142661	MYOM3	myomesin 3	385.369	-1.04667	0.158438	-6.60617	3.9438e-11	2.03897e-08
chr20	56533010	56533298	288	*	Promoter (<=1kb)	20	56533246	56536520	3275	1	388799	ENST00000371325.1	0	ENSG00000213714	FAM209B	family with sequence similarity 209 member B	40.747	-1.04647	0.380869	-2.74758	0.00600376	NA
chr11	70371276	70371588	312	*	Promoter (<=1kb)	11	70371327	70384394	13068	1	8500	ENST00000531657.1	0	ENSG00000131626	PPFIA1	PTPRF interacting protein alpha 1	77.9707	-1.04615	0.297593	-3.51537	0.000439139	0.0136169
chr12	95988997	95989145	148	*	Promoter (1-2kb)	12	95989563	95990507	945	2	3034	ENST00000551562.1	1362	ENSG00000084110	HAL	histidine ammonia-lyase	27.49	-1.04586	0.478178	-2.18717	0.0287299	NA
chr8	142324948	142325093	145	*	Promoter (1-2kb)	8	142300116	142326225	26110	2	203062	ENST00000518928.1	1132	ENSG00000171045	TSNARE1	t-SNARE domain containing 1	32.4814	-1.04397	0.416775	-2.50489	0.012249	NA
chr10	120792189	120792493	304	*	Promoter (1-2kb)	10	120763401	120793525	30125	2	283089	ENST00000451706.3	1032	ENSG00000227165	WDR11-DT	WDR11 divergent transcript	50.1806	-1.04255	0.343805	-3.03239	0.00242627	0.0402797
chr8	7486405	7486533	128	*	Promoter (<=1kb)	8	7482504	7486400	3897	2	503841	ENST00000335479.2	-6	ENSG00000187082	DEFB106B	defensin beta 106B	20.7313	-1.04093	0.559495	-1.86049	0.0628166	NA
chr17	77273939	77274089	150	*	Promoter (<=1kb)	17	77257737	77274326	16590	2	105371907	ENST00000581657.1	237	ENSG00000263718	SEPTIN9-DT	SEPTIN9 divergent transcript	26.7947	-1.04043	0.496347	-2.09618	0.0360663	NA
chr10	17809106	17809270	164	*	Promoter (<=1kb)	10	17809348	17911164	101817	1	4360	ENST00000569591.3	-78	ENSG00000260314	MRC1	mannose receptor C-type 1	33.0173	-1.04032	0.468512	-2.22049	0.0263858	NA
chr8	22059918	22060171	253	*	Promoter (<=1kb)	8	22059348	22082518	23171	1	2039	ENST00000415253.5	571	ENSG00000158856	DMTN	dematin actin binding protein	80.9182	-1.03969	0.311431	-3.33844	0.00084249	0.0210207
chr7	30446324	30446625	301	*	Promoter (1-2kb)	7	30424534	30447977	23444	2	10392	ENST00000489614.5	1352	ENSG00000106100	NOD1	nucleotide binding oligomerization domain containing 1	40.612	-1.03666	0.370107	-2.80098	0.00509479	NA
chr9	107430772	107430972	200	*	Promoter (<=1kb)	9	107420284	107430802	10519	2	101928720	ENST00000423523.1	0	NA	LINC01509	long intergenic non-protein coding RNA 1509	30.2211	-1.03607	0.429652	-2.41142	0.0158905	NA
chr8	22023764	22023836	72	*	Promoter (<=1kb)	8	22024125	22033156	9032	1	10361	ENST00000520125.5	-289	ENSG00000158806	NPM2	nucleophosmin/nucleoplasmin 2	18.3032	-1.03588	0.569072	-1.82031	0.0687123	NA
chr16	11273582	11273767	185	*	Promoter (<=1kb)	16	11273199	11273629	431	2	58531	ENST00000327157.4	0	ENSG00000178257	PRM3	protamine 3	39.2302	-1.03428	0.377215	-2.74188	0.00610889	NA
chr2	17713402	17713610	208	*	Promoter (1-2kb)	2	17707228	17714877	7650	2	79677	ENST00000430591.1	1267	ENSG00000163029	SMC6	structural maintenance of chromosomes 6	33.458	-1.03363	0.408303	-2.53152	0.0113568	NA
chr6	149890595	149891028	433	*	Promoter (<=1kb)	6	149888472	149890932	2461	2	135250	ENST00000392270.3	0	ENSG00000164520	RAET1E	retinoic acid early transcript 1E	71.8334	-1.03286	0.289609	-3.5664	0.000361921	0.0118467
chr22	31933104	31933360	256	*	Promoter (1-2kb)	22	31926202	31931960	5759	2	105372998	ENST00000676309.1	-1145	NA	LOC105372998	uncharacterized LOC105372998	45.0704	-1.03273	0.353751	-2.91936	0.00350753	0.0503767
chr6	150684721	150685168	447	*	Promoter (1-2kb)	6	150683612	150843350	159739	1	57480	ENST00000644968.1	1110	ENSG00000120278	PLEKHG1	pleckstrin homology and RhoGEF domain containing G1	178.226	-1.0324	0.193518	-5.33491	9.55926e-08	1.74863e-05
chr20	63566478	63566625	147	*	Promoter (1-2kb)	20	63558086	63568074	9989	2	85441	ENST00000427522.6	1449	ENSG00000130589	HELZ2	helicase with zinc finger 2	46.6807	-1.03176	0.378762	-2.72403	0.00644915	0.0721441
chr16	22166661	22166815	154	*	Promoter (1-2kb)	16	22165583	22191754	26172	1	100288072	ENST00000602312.2	1079	ENSG00000183921	SDR42E2	short chain dehydrogenase/reductase family 42E, member 2	28.6576	-1.03147	0.469908	-2.19504	0.0281605	NA
chr9	131076534	131076749	215	*	Promoter (1-2kb)	9	131077799	131092058	14260	1	10319	ENST00000678544.1	-1050	ENSG00000050555	LAMC3	laminin subunit gamma 3	38.8297	-1.03057	0.386016	-2.66976	0.00759064	NA
chr1	161068235	161068606	371	*	Promoter (1-2kb)	1	161046948	161069666	22719	2	257106	ENST00000368016.7	1060	ENSG00000186517	ARHGAP30	Rho GTPase activating protein 30	90.9543	-1.02966	0.276092	-3.72941	0.000191928	0.00768579
chr22	44764826	44765189	363	*	Promoter (<=1kb)	22	44765229	44786508	21280	1	23779	ENST00000469872.1	-40	ENSG00000241484	ARHGAP8	Rho GTPase activating protein 8	52.0278	-1.02909	0.353895	-2.90791	0.00363859	0.0515627
chr7	6810925	6811024	99	*	Promoter (1-2kb)	7	6806004	6812510	6507	2	221960	ENST00000462378.1	1486	ENSG00000146574	CCZ1B	CCZ1 homolog B, vacuolar protein trafficking and biogenesis associated	23.6832	-1.02857	0.487985	-2.10778	0.03505	NA
chr5	126508738	126508888	150	*	Promoter (<=1kb)	5	126372477	126509021	136545	2	101927514	ENST00000648070.1	133	NA	LOC101927514	uncharacterized LOC101927514	17.7635	-1.02786	0.615722	-1.66936	0.0950455	NA
chr3	46462578	46462784	206	*	Promoter (<=1kb)	3	46438095	46463644	25550	2	4057	ENST00000478874.2	860	ENSG00000012223	LTF	lactotransferrin	53.3018	-1.02775	0.32213	-3.19048	0.00142036	0.0291936
chr6	54111367	54111879	512	*	Promoter (<=1kb)	6	54111418	54137909	26492	1	90523	ENST00000503951.5	0	ENSG00000146147	MLIP	muscular LMNA interacting protein	146.725	-1.02586	0.237295	-4.32312	1.53839e-05	0.0011269
chr2	73870143	73870361	218	*	Promoter (<=1kb)	2	73869789	73873588	3800	1	10617	ENST00000487811.2	355	ENSG00000124356	STAMBP	STAM binding protein	73.0105	-1.02477	0.325967	-3.1438	0.0016677	0.0322856
chr19	6333013	6333171	158	*	Promoter (<=1kb)	19	6306142	6333612	27471	2	125981	ENST00000301452.5	441	ENSG00000167769	ACER1	alkaline ceramidase 1	28.8022	-1.02472	0.435908	-2.35077	0.0187345	NA
chr13	45614328	45614409	81	*	Promoter (1-2kb)	13	45563663	45615724	52062	2	220081	ENST00000378977.2	1315	ENSG00000165837	ERICH6B	glutamate rich 6B	17.3393	-1.02459	0.575563	-1.78015	0.0750509	NA
chr22	22887560	22887723	163	*	Promoter (<=1kb)	22	22887780	22896107	8328	1	100423062	ENST00000532223.2	-57	ENSG00000254709	IGLL5	immunoglobulin lambda like polypeptide 5	33.9687	-1.02453	0.4042	-2.53473	0.0112536	NA
chr16	31568923	31569073	150	*	Promoter (<=1kb)	16	31568386	31569475	1090	2	440359	ENST00000566722.1	402	NA	YBX3P1	Y-box binding protein 3 pseudogene 1	27.4303	-1.02398	0.471638	-2.17111	0.0299227	NA
chr10	33006040	33006192	152	*	Promoter (<=1kb)	10	32922778	33005792	83015	2	3688	ENST00000475184.6	-249	ENSG00000150093	ITGB1	integrin subunit beta 1	19.1017	-1.02379	0.53044	-1.93008	0.0535966	NA
chr2	3387878	3388116	238	*	Promoter (<=1kb)	2	3388127	3421970	33844	1	51112	ENST00000411973.3	-11	ENSG00000171853	TRAPPC12	trafficking protein particle complex subunit 12	38.0585	-1.02312	0.414814	-2.46646	0.0136457	NA
chr19	39980035	39980061	26	*	Promoter (<=1kb)	19	39979444	39980178	735	1	5704	ENST00000601194.1	592	ENSG00000013275	PSMC4	proteasome 26S subunit, ATPase 4	9.62934	-1.02202	0.776311	-1.3165	0.188005	NA
chr3	71468935	71469329	394	*	Promoter (<=1kb)	3	71318202	71469567	151366	2	27086	ENST00000649145.1	238	ENSG00000114861	FOXP1	forkhead box P1	94.0998	-1.02062	0.249785	-4.08602	4.38843e-05	0.00256595
chr14	54901023	54901198	175	*	Promoter (1-2kb)	14	54842996	54902446	59451	2	2643	ENST00000395521.6	1248	ENSG00000131979	GCH1	GTP cyclohydrolase 1	59.6369	-1.01943	0.324045	-3.14596	0.00165545	0.0321504
chr6	57948861	57948998	137	*	Promoter (1-2kb)	6	57946083	57950399	4317	2	106660612	ENST00000422882.1	1401	ENSG00000215190	LINC00680	long intergenic non-protein coding RNA 680	24.7358	-1.01866	0.481862	-2.11401	0.0345148	NA
chr14	55794727	55794943	216	*	Promoter (1-2kb)	14	55787665	55793429	5765	2	645687	ENST00000648365.1	-1299	ENSG00000258791	LINC00520	long intergenic non-protein coding RNA 520	63.3656	-1.01818	0.299655	-3.39782	0.000679246	0.0182717
chr17	80170033	80170188	155	*	Promoter (<=1kb)	17	80170034	80181649	11616	1	79092	ENST00000575465.6	0	ENSG00000141527	CARD14	caspase recruitment domain family member 14	24.6855	-1.01779	0.494108	-2.05984	0.0394136	NA
chr19	11355919	11356040	121	*	Promoter (<=1kb)	19	11355498	11365694	10197	1	64748	ENST00000591608.1	422	ENSG00000105520	PLPPR2	phospholipid phosphatase related 2	24.9211	-1.01671	0.473018	-2.14941	0.031602	NA
chr16	66844283	66844288	5	*	Promoter (<=1kb)	16	66844414	66854147	9734	1	766	ENST00000338437.7	-126	ENSG00000168748	CA7	carbonic anhydrase 7	10.4562	-1.01566	0.769494	-1.31991	0.186865	NA
chr2	222920326	222920421	95	*	Promoter (<=1kb)	2	222920954	222927053	6100	1	2181	ENST00000421680.2	-533	ENSG00000123983	ACSL3	acyl-CoA synthetase long chain family member 3	14.3702	-1.01504	0.618488	-1.64116	0.100764	NA
chrX	41924198	41924270	72	*	Promoter (<=1kb)	23	41514934	41923554	408621	2	8573	ENST00000378163.7	-645	ENSG00000147044	CASK	calcium/calmodulin dependent serine protein kinase	7.25981	-1.01287	0.901451	-1.1236	0.261182	NA
chr7	98224488	98224724	236	*	Promoter (<=1kb)	7	98217967	98223743	5777	2	25851	ENST00000474915.5	-746	ENSG00000205356	TECPR1	tectonin beta-propeller repeat containing 1	40.5649	-1.0119	0.370053	-2.73447	0.00624804	NA
chr1	161238263	161238421	158	*	Promoter (<=1kb)	1	161231167	161238244	7078	2	9970	ENST00000515452.1	-20	ENSG00000143257	NR1I3	nuclear receptor subfamily 1 group I member 3	30.5693	-1.01111	0.450634	-2.24374	0.0248491	NA
chr15	55357850	55358121	271	*	Promoter (1-2kb)	15	55340032	55359682	19651	2	9236	ENST00000564663.1	1561	ENSG00000260916	CCPG1	cell cycle progression 1	96.1357	-1.01106	0.257199	-3.93106	8.45732e-05	0.00421566
chr18	79735311	79735483	172	*	Promoter (<=1kb)	18	79734701	79754501	19801	1	9150	ENST00000590599.2	611	ENSG00000060069	CTDP1	CTD phosphatase subunit 1	37.0784	-1.00941	0.415815	-2.42755	0.015201	NA
chr19	46937475	46937517	42	*	Promoter (<=1kb)	19	46937320	47001425	64106	1	2909	ENST00000595822.1	156	ENSG00000160007	ARHGAP35	Rho GTPase activating protein 35	5.87903	-1.00938	0.976418	-1.03376	0.301249	NA
chr12	131942091	131942176	85	*	Promoter (1-2kb)	12	131940927	131943859	2933	1	80324	ENST00000543754.1	1165	ENSG00000177192	PUS1	pseudouridine synthase 1	17.6283	-1.00792	0.565551	-1.78219	0.074719	NA
chr2	5693482	5693595	113	*	Promoter (1-2kb)	2	5692384	5701385	9002	1	6664	ENST00000322002.5	1099	ENSG00000176887	SOX11	SRY-box transcription factor 11	16.258	-1.00718	0.592379	-1.70023	0.0890877	NA
chr6	53573515	53573693	178	*	Promoter (<=1kb)	6	53569281	53573265	3985	2	101927136	ENST00000420819.2	-251	ENSG00000231683	LOC101927136	uncharacterized LOC101927136	31.6599	-1.00684	0.444306	-2.2661	0.0234455	NA
chr1	203177500	203177808	308	*	Promoter (1-2kb)	1	203167811	203175826	8016	2	4608	ENST00000255416.9	-1675	ENSG00000133055	MYBPH	myosin binding protein H	94.5816	-1.00552	0.292442	-3.43836	0.00058526	0.0166447
chr11	33722616	33722903	287	*	Promoter (<=1kb)	11	33709635	33722710	13076	2	966	ENST00000415002.7	0	ENSG00000085063	CD59	CD59 molecule (CD59 blood group)	117.246	-1.00453	0.232456	-4.32137	1.55062e-05	0.00113417
chr10	45199002	45199109	107	*	Promoter (<=1kb)	10	45187292	45198323	11032	2	105378283	ENST00000619383.1	-680	NA	LOC105378283	uncharacterized LOC105378283	22.7018	-1.00428	0.49082	-2.04613	0.0407431	NA
chr19	7596162	7596162	0	*	Promoter (<=1kb)	19	7595902	7618304	22403	1	57662	ENST00000446248.4	261	ENSG00000076826	CAMSAP3	calmodulin regulated spectrin associated protein family member 3	1.63829	-1.00384	1.9089	-0.525876	0.598975	NA
chr19	15813939	15814286	347	*	Promoter (1-2kb)	19	15804549	15815664	11116	2	26539	ENST00000641419.1	1378	ENSG00000186723	OR10H1	olfactory receptor family 10 subfamily H member 1	55.0307	-1.00331	0.319885	-3.13647	0.00170997	0.0326794
chr12	54379478	54379540	62	*	Promoter (<=1kb)	12	54369878	54379189	9312	2	25946	ENST00000552382.5	-290	ENSG00000161642	ZNF385A	zinc finger protein 385A	7.70963	-1.00289	0.823974	-1.21714	0.22355	NA
chr1	51060026	51060323	297	*	Promoter (<=1kb)	1	51060018	51060103	86	1	102466656	ENST00000622700.1	9	ENSG00000275816	MIR6500	microRNA 6500	37.5268	-1.00255	0.388214	-2.58247	0.00980951	NA
chr1	158146790	158147149	359	*	Promoter (<=1kb)	1	158131983	158146897	14915	2	646268	ENST00000656134.1	0	ENSG00000231666	LINC01704	long intergenic non-protein coding RNA 1704	102.668	-1.00059	0.284414	-3.51808	0.000434687	0.013534
chr10	96153142	96153350	208	*	Promoter (1-2kb)	10	96151409	96163752	12344	1	9849	ENST00000614149.1	1734	ENSG00000177853	ZNF518A	zinc finger protein 518A	31.9653	-1.00015	0.411725	-2.42916	0.015134	NA
chr12	113307663	113307803	140	*	Promoter (<=1kb)	12	113299332	113306844	7513	2	80024	ENST00000549069.5	-820	ENSG00000089060	SLC8B1	solute carrier family 8 member B1	33.518	-0.999926	0.43214	-2.31389	0.0206735	NA
chr11	986912	987009	97	*	Promoter (1-2kb)	11	985538	988827	3290	1	161	ENST00000524952.2	1375	ENSG00000183020	AP2A2	adaptor related protein complex 2 subunit alpha 2	28.1187	-0.998499	0.445509	-2.24125	0.0250096	NA
chr16	90100763	90101194	431	*	Promoter (1-2kb)	16	90102271	90137993	35723	1	100996541	ENST00000563357.1	-1077	NA	FAM157C	family with sequence similarity 157 member C	84.8656	-0.998141	0.261663	-3.8146	0.000136403	0.00600581
chr6	109342534	109342823	289	*	Promoter (1-2kb)	6	109343987	109355063	11077	1	221262	ENST00000473454.6	-1164	ENSG00000203799	CCDC162P	coiled-coil domain containing 162, pseudogene	51.7989	-0.997862	0.330685	-3.01756	0.00254815	0.0415865
chr11	133945111	133946051	940	*	Promoter (<=1kb)	11	133937407	133946292	8886	2	22997	ENST00000533160.1	241	ENSG00000080854	IGSF9B	immunoglobulin superfamily member 9B	376.045	-0.996913	0.151568	-6.57733	4.78967e-11	2.41279e-08
chr15	99385985	99386246	261	*	Promoter (1-2kb)	15	99384294	99386295	2002	1	123355	ENST00000561431.1	1692	ENSG00000168904	LRRC28	leucine rich repeat containing 28	80.7621	-0.996871	0.286675	-3.47735	0.000506393	0.015073
chr7	100353111	100353357	246	*	Promoter (<=1kb)	7	100353029	100358259	5231	1	101752399	ENST00000455145.5	83	ENSG00000272752	STAG3L5P-PVRIG2P-PILRB	STAG3L5P-PVRIG2P-PILRB readthrough	51.6471	-0.996825	0.345915	-2.88171	0.00395529	0.0540551
chr19	35797589	35797637	48	*	Promoter (<=1kb)	19	35791103	35797838	6736	2	644050	ENST00000564335.1	201	ENSG00000225872	LINC01529	long intergenic non-protein coding RNA 1529	14.0026	-0.996352	0.686672	-1.45099	0.146783	NA
chr9	840557	840737	180	*	Promoter (<=1kb)	9	841690	894985	53296	1	1761	ENST00000564322.1	-953	ENSG00000137090	DMRT1	doublesex and mab-3 related transcription factor 1	28.2869	-0.996059	0.448543	-2.22065	0.0263744	NA
chr1	2214617	2214863	246	*	Promoter (1-2kb)	1	2189548	2212720	23173	2	199990	ENST00000487186.5	-1898	ENSG00000162585	FAAP20	FA core complex associated protein 20	94.9913	-0.995038	0.277555	-3.58501	0.000337062	0.0113196
chr19	1970073	1970328	255	*	Promoter (<=1kb)	19	1969826	1979403	9578	1	1455	ENST00000589385.5	248	ENSG00000133275	CSNK1G2	casein kinase 1 gamma 2	45.696	-0.994965	0.352063	-2.8261	0.00471189	0.060124
chr19	51531057	51531183	126	*	Promoter (<=1kb)	19	51517819	51531670	13852	2	946	ENST00000425629.8	487	ENSG00000105492	SIGLEC6	sialic acid binding Ig like lectin 6	21.2798	-0.994634	0.499873	-1.98977	0.0466161	NA
chr2	236265772	236265947	175	*	Promoter (1-2kb)	2	236214754	236264409	49656	2	401036	ENST00000430053.1	-1364	ENSG00000182177	ASB18	ankyrin repeat and SOCS box containing 18	34.1093	-0.994451	0.429334	-2.31626	0.0205439	NA
chr19	45413761	45413837	76	*	Promoter (<=1kb)	19	45413436	45414477	1042	2	2067	ENST00000592410.5	640	ENSG00000012061	ERCC1	ERCC excision repair 1, endonuclease non-catalytic subunit	17.0133	-0.992858	0.560207	-1.77231	0.0763438	NA
chr8	19940371	19940472	101	*	Promoter (<=1kb)	8	19939372	19948485	9114	1	4023	ENST00000523696.1	1000	ENSG00000175445	LPL	lipoprotein lipase	16.6896	-0.992447	0.567527	-1.74872	0.0803394	NA
chr3	51943135	51943324	189	*	Promoter (<=1kb)	3	51943250	51948724	5475	1	10039	ENST00000498510.2	0	ENSG00000041880	PARP3	poly(ADP-ribose) polymerase family member 3	115.294	-0.991998	0.227664	-4.35729	1.3168e-05	0.00100819
chr11	64971623	64971771	148	*	Promoter (<=1kb)	11	64938230	64972023	33794	2	283129	ENST00000530444.5	252	ENSG00000168070	MAJIN	membrane anchored junction protein	19.8435	-0.991133	0.522767	-1.89594	0.0579684	NA
chr12	5614273	5614627	354	*	Promoter (<=1kb)	12	5608729	5615295	6567	2	57101	ENST00000541874.1	668	ENSG00000047617	ANO2	anoctamin 2	72.812	-0.990803	0.327747	-3.02308	0.00250219	0.0410682
chr16	89596695	89596774	79	*	Promoter (<=1kb)	16	89595770	89596845	1076	1	27132	ENST00000564421.1	926	ENSG00000178773	CPNE7	copine 7	21.7064	-0.990402	0.528192	-1.87508	0.0607815	NA
chr17	64905272	64905422	150	*	Promoter (<=1kb)	17	64897629	64905802	8174	2	374819	ENST00000577487.1	380	ENSG00000176809	LRRC37A3	leucine rich repeat containing 37 member A3	25.1854	-0.988485	0.486261	-2.03283	0.0420699	NA
chr1	16483392	16483670	278	*	Promoter (<=1kb)	1	16476930	16483341	6412	2	114819	ENST00000591316.1	-52	ENSG00000080947	CROCCP3	CROCC pseudogene 3	67.3936	-0.987913	0.315003	-3.1362	0.00171153	0.0327028
chr16	15134850	15135049	199	*	Promoter (<=1kb)	16	15134075	15134145	71	2	102465985	ENST00000636908.1	-706	ENSG00000283346	MIR6511B2	microRNA 6511b-2	39.3305	-0.986669	0.382412	-2.58012	0.00987656	NA
chr11	85685937	85685982	45	*	Promoter (<=1kb)	11	85683848	85686195	2348	2	220388	ENST00000316398.5	213	ENSG00000179071	CCDC89	coiled-coil domain containing 89	15.0745	-0.986525	0.598779	-1.64756	0.0994428	NA
chr15	76260641	76261090	449	*	Promoter (<=1kb)	15	76258986	76261690	2705	2	7302	ENST00000558165.3	600	NA	TYRO3P	TYRO3P protein tyrosine kinase pseudogene	61.8716	-0.986504	0.327775	-3.0097	0.00261507	0.0422502
chr1	56525658	56525827	169	*	Promoter (1-2kb)	1	56248294	56524495	276202	2	8613	ENST00000642129.1	-1164	ENSG00000162407	PLPP3	phospholipid phosphatase 3	43.7783	-0.985232	0.359188	-2.74294	0.0060891	0.0699986
chr16	1735204	1735298	94	*	Promoter (<=1kb)	16	1734985	1735066	82	1	100423012	ENST00000578255.1	220	ENSG00000265820	MIR3177	microRNA 3177	12.7617	-0.984835	0.690642	-1.42597	0.153877	NA
chr14	63178966	63179557	591	*	Promoter (<=1kb)	14	63122888	63178190	55303	2	105370531	ENST00000654636.1	-777	ENSG00000259093	LOC105370531	uncharacterized LOC105370531	185.563	-0.98475	0.205647	-4.78855	1.67987e-06	0.000189021
chr6	35805868	35805907	39	*	Promoter (<=1kb)	6	35805839	35837129	31291	1	222662	ENST00000652718.1	30	ENSG00000197753	LHFPL5	LHFPL tetraspan subfamily member 5	13.1004	-0.983283	0.650538	-1.51149	0.130663	NA
chr17	39928633	39928793	160	*	Promoter (<=1kb)	17	39927867	39939601	11735	1	112268187	ENST00000582263.1	767	NA	LOC112268187	uncharacterized LOC112268187	56.1597	-0.983113	0.341484	-2.87895	0.00399005	0.0543705
chr12	108811595	108811700	105	*	Promoter (<=1kb)	12	108807793	108811634	3842	2	54434	ENST00000547381.1	0	ENSG00000084112	SSH1	slingshot protein phosphatase 1	25.6728	-0.981537	0.466216	-2.10533	0.0352628	NA
chr19	3728515	3728780	265	*	Promoter (<=1kb)	19	3728376	3750813	22438	1	27134	ENST00000587686.1	140	ENSG00000105289	TJP3	tight junction protein 3	43.1697	-0.981296	0.359754	-2.72769	0.00637803	0.0718349
chr5	176132524	176132738	214	*	Promoter (1-2kb)	5	176124210	176131461	7252	2	107986487	ENST00000504629.1	-1064	NA	LOC107986487	uncharacterized LOC107986487	37.0729	-0.980738	0.387923	-2.52818	0.0114657	NA
chr19	10361715	10361811	96	*	Promoter (<=1kb)	19	10357794	10361905	4112	2	7297	ENST00000533334.1	94	ENSG00000105397	TYK2	tyrosine kinase 2	25.7415	-0.980385	0.45841	-2.13867	0.0324628	NA
chr18	58449601	58449778	177	*	Promoter (1-2kb)	18	58451074	58451158	85	1	406906	ENST00000385044.3	-1296	ENSG00000284440	MIR122	microRNA 122	29.1199	-0.980024	0.438534	-2.23477	0.0254323	NA
chr8	142876561	142876728	167	*	Promoter (<=1kb)	8	142872357	142875797	3441	2	1584	ENST00000519285.5	-765	ENSG00000160882	CYP11B1	cytochrome P450 family 11 subfamily B member 1	34.2472	-0.979546	0.411471	-2.3806	0.0172847	NA
chr10	48509544	48509718	174	*	Promoter (1-2kb)	10	48510525	48511589	1065	2	100689073	ENST00000505718.1	1871	NA	ARHGAP22-IT1	ARHGAP22 intronic transcript 1	50.9369	-0.978829	0.354856	-2.75838	0.00580878	0.0680403
chr7	92724045	92724271	226	*	Promoter (1-2kb)	7	92671235	92725710	54476	2	1021	ENST00000473078.1	1439	ENSG00000105810	CDK6	cyclin dependent kinase 6	40.868	-0.978593	0.381199	-2.56714	0.0102541	NA
chr1	16938462	16938645	183	*	Promoter (<=1kb)	1	16938909	16954357	15449	1	9696	ENST00000494191.6	-264	ENSG00000058453	CROCC	ciliary rootlet coiled-coil, rootletin	44.4752	-0.977284	0.4312	-2.26643	0.0234254	0.151857
chr8	142683612	142683845	233	*	Promoter (1-2kb)	8	142666415	142681968	15554	2	8629	ENST00000591357.5	-1645	ENSG00000234616	JRK	Jrk helix-turn-helix protein	47.1045	-0.977232	0.347465	-2.81246	0.00491642	0.0617024
chr16	18386640	18386682	42	*	Promoter (1-2kb)	16	18383471	18385229	1759	2	110006322	ENST00000538166.1	-1412	NA	PKD1P5-LOC105376752	PKD1P5-LOC105376752 readthrough	9.16299	-0.976935	0.767148	-1.27346	0.202853	NA
chr6	152318367	152318517	150	*	Promoter (<=1kb)	6	152121780	152318344	196565	2	23345	ENST00000367256.9	-24	ENSG00000131018	SYNE1	spectrin repeat containing nuclear envelope protein 1	53.7629	-0.976571	0.333274	-2.93023	0.00338711	0.0493336
chr5	141928123	141928400	277	*	Promoter (1-2kb)	5	141930247	141934996	4750	1	9812	ENST00000502729.1	-1847	ENSG00000081791	DELE1	DAP3 binding cell death enhancer 1	85.3071	-0.976062	0.261627	-3.73074	0.00019092	0.00766419
chr19	964307	964641	334	*	Promoter (<=1kb)	19	964289	965270	982	1	1820	ENST00000585733.2	19	ENSG00000116017	ARID3A	AT-rich interaction domain 3A	63.9189	-0.976042	0.312048	-3.12786	0.00176085	0.0332783
chr12	103766119	103766244	125	*	Promoter (<=1kb)	12	103746315	103766906	20592	2	51559	ENST00000551299.1	662	ENSG00000111696	NT5DC3	5'-nucleotidase domain containing 3	27.7564	-0.975526	0.453155	-2.15274	0.0313388	NA
chr3	123089910	123089995	85	*	Promoter (<=1kb)	3	123089107	123111007	21901	1	10954	ENST00000495004.1	804	ENSG00000065485	PDIA5	protein disulfide isomerase family A member 5	13.9976	-0.975267	0.634803	-1.53633	0.124457	NA
chr4	53987962	53988345	383	*	Promoter (<=1kb)	4	53986587	53987058	472	2	402176	ENST00000491826.2	-905	NA	RPL21P44	ribosomal protein L21 pseudogene 44	100.228	-0.974725	0.240767	-4.04841	5.1567e-05	0.00289291
chr15	22904126	22904195	69	*	Promoter (1-2kb)	15	22869466	22905440	35975	2	23191	ENST00000619348.4	1245	ENSG00000273749	CYFIP1	cytoplasmic FMR1 interacting protein 1	17.7302	-0.972598	0.578937	-1.67997	0.0929624	NA
chr20	31869541	31869564	23	*	Promoter (<=1kb)	20	31861067	31869998	8932	2	128853	ENST00000398083.5	434	ENSG00000149599	DUSP15	dual specificity phosphatase 15	4.57852	-0.971201	1.07978	-0.899444	0.368416	NA
chr2	215830346	215830688	342	*	Promoter (<=1kb)	2	215641768	215831590	189823	2	646324	ENST00000451392.5	902	ENSG00000235770	LINC00607	long intergenic non-protein coding RNA 607	197.444	-0.970489	0.183862	-5.27835	1.30353e-07	2.27608e-05
chr19	14395812	14396559	747	*	Promoter (<=1kb)	19	14396250	14397911	1662	1	976	ENST00000591737.1	0	ENSG00000123146	ADGRE5	adhesion G protein-coupled receptor E5	117.166	-0.970489	0.229881	-4.22171	2.42461e-05	0.00162353
chr6	163347192	163347441	249	*	Promoter (<=1kb)	6	163338394	163346744	8351	2	401282	ENST00000648606.1	-449	ENSG00000285564	DKFZp451B082	uncharacterized LOC401282	84.9508	-0.970421	0.312725	-3.10312	0.00191494	0.0350096
chr18	3961016	3961193	177	*	Promoter (1-2kb)	18	3962353	4014712	52360	1	101410534	ENST00000652891.1	-1160	NA	DLGAP1-AS4	DLGAP1 antisense RNA 4	24.0459	-0.970186	0.475422	-2.04068	0.0412823	NA
chr1	185961793	185961943	150	*	Promoter (1-2kb)	1	185963808	185978145	14338	1	83872	ENST00000493413.1	-1865	ENSG00000143341	HMCN1	hemicentin 1	41.9191	-0.969354	0.366747	-2.64311	0.00821471	NA
chr6	133241290	133241474	184	*	Promoter (<=1kb)	6	133241303	133247816	6514	1	2070	ENST00000684040.1	0	ENSG00000112319	EYA4	EYA transcriptional coactivator and phosphatase 4	32.5206	-0.968864	0.4107	-2.35906	0.0183213	NA
chr17	72422933	72423111	178	*	Promoter (<=1kb)	17	72403322	72423047	19726	2	100499467	ENST00000650371.1	0	ENSG00000227036	LINC00673	long intergenic non-protein coding RNA 673	42.9387	-0.967509	0.403168	-2.39976	0.0164056	0.124694
chr12	54017664	54017802	138	*	Promoter (<=1kb)	12	54017110	54035361	18252	1	3222	ENST00000512206.1	555	ENSG00000172789	HOXC5	homeobox C5	28.9824	-0.964586	0.44763	-2.15488	0.0311716	NA
chr1	52906472	52906645	173	*	Promoter (<=1kb)	1	52899177	52907101	7925	2	55268	ENST00000486170.2	456	ENSG00000121310	ECHDC2	enoyl-CoA hydratase domain containing 2	25.7006	-0.962674	0.479829	-2.00629	0.0448255	NA
chr1	32272787	32272950	163	*	Promoter (1-2kb)	1	32274111	32286164	12054	1	3932	ENST00000619559.4	-1161	ENSG00000182866	LCK	LCK proto-oncogene, Src family tyrosine kinase	33.644	-0.962305	0.404956	-2.37632	0.0174862	NA
chr15	99385234	99385370	136	*	Promoter (<=1kb)	15	99384294	99386295	2002	1	123355	ENST00000561431.1	941	ENSG00000168904	LRRC28	leucine rich repeat containing 28	21.5173	-0.961724	0.49813	-1.93067	0.053524	NA
chr1	59672919	59673098	179	*	Promoter (<=1kb)	1	59673657	59762544	88888	1	55277	ENST00000472783.5	-559	ENSG00000172456	FGGY	FGGY carbohydrate kinase domain containing	49.9881	-0.96116	0.34081	-2.82022	0.00479901	0.0608102
chr17	896901	897647	746	*	Promoter (<=1kb)	17	819114	897014	77901	2	64359	ENST00000575455.5	0	ENSG00000167693	NXN	nucleoredoxin	118.766	-0.960865	0.228573	-4.20376	2.62516e-05	0.00173301
chr19	14096665	14097045	380	*	Promoter (1-2kb)	19	14096251	14098510	2260	2	5566	ENST00000679067.1	1465	ENSG00000072062	PRKACA	protein kinase cAMP-activated catalytic subunit alpha	55.0625	-0.960561	0.323546	-2.96885	0.00298913	0.0458069
chr17	75723107	75723633	526	*	Promoter (1-2kb)	17	75724696	75757818	33123	1	3691	ENST00000449880.6	-1063	ENSG00000132470	ITGB4	integrin subunit beta 4	196.3	-0.960417	0.193632	-4.96	7.04919e-07	9.18367e-05
chr5	157309933	157310174	241	*	Promoter (<=1kb)	5	157311038	157314370	3333	1	26999	ENST00000520942.1	-864	ENSG00000055163	CYFIP2	cytoplasmic FMR1 interacting protein 2	45.2101	-0.960142	0.354724	-2.70673	0.00679498	0.0745618
chr17	44023901	44024600	699	*	Promoter (<=1kb)	17	44011188	44023151	11964	2	84336	ENST00000589334.5	-751	ENSG00000091947	TMEM101	transmembrane protein 101	88.6205	-0.960061	0.284298	-3.37695	0.000732937	0.0191876
chr11	46665407	46665514	107	*	Promoter (<=1kb)	11	46665509	46669532	4024	1	9776	ENST00000529395.1	0	ENSG00000175224	ATG13	autophagy related 13	20.1752	-0.959635	0.535166	-1.79315	0.0729487	NA
chr16	68687968	68688107	139	*	Promoter (<=1kb)	16	68687620	68698472	10853	1	1001	ENST00000567674.1	349	ENSG00000062038	CDH3	cadherin 3	26.6677	-0.959456	0.461108	-2.08076	0.0374558	NA
chr7	99352115	99352116	1	*	Promoter (1-2kb)	7	99353935	99360242	6308	1	10552	ENST00000471960.5	-1819	ENSG00000241685	ARPC1A	actin related protein 2/3 complex subunit 1A	8.23873	-0.959345	0.815846	-1.17589	0.239639	NA
chr1	1518987	1519158	171	*	Promoter (1-2kb)	1	1517621	1522780	5160	1	55210	ENST00000429957.1	1367	ENSG00000197785	ATAD3A	ATPase family AAA domain containing 3A	46.3478	-0.959279	0.371552	-2.58182	0.00982808	0.0924026
chr9	130264174	130264237	63	*	Promoter (1-2kb)	9	130265760	130434123	168364	1	256158	ENST00000683500.1	-1523	ENSG00000148357	HMCN2	hemicentin 2	15.0538	-0.959156	0.626342	-1.53136	0.12568	NA
chr1	1387304	1387327	23	*	Promoter (1-2kb)	1	1386495	1388713	2219	2	81669	ENST00000463260.5	1386	ENSG00000221978	CCNL2	cyclin L2	12.987	-0.957974	0.647536	-1.47941	0.13903	NA
chr20	18315678	18316077	399	*	Promoter (<=1kb)	20	18313765	18315111	1347	2	105372550	ENST00000436848.1	-568	NA	ZNF133-AS1	ZNF133 antisense RNA 1	49.8632	-0.957625	0.346352	-2.76489	0.00569421	0.0672177
chr19	46298622	46298661	39	*	Promoter (<=1kb)	19	46298458	46331513	33056	1	64344	ENST00000291300.8	165	ENSG00000124440	HIF3A	hypoxia inducible factor 3 subunit alpha	16.9116	-0.956171	0.576739	-1.65789	0.0973392	NA
chr7	75823728	75823800	72	*	Promoter (<=1kb)	7	75811665	75823356	11692	2	6369	ENST00000416943.1	-373	ENSG00000106178	CCL24	C-C motif chemokine ligand 24	23.4294	-0.955219	0.480559	-1.98772	0.0468422	NA
chr17	50519534	50519745	211	*	Promoter (<=1kb)	17	50519410	50520221	812	1	84073	ENST00000468821.1	125	ENSG00000136449	MYCBPAP	MYCBP associated protein	54.8445	-0.954883	0.31801	-3.00268	0.00267612	0.0429258
chr7	100646459	100646679	220	*	Promoter (1-2kb)	7	100643142	100647738	4597	2	51412	ENST00000487125.1	1059	ENSG00000077080	ACTL6B	actin like 6B	41.9108	-0.954597	0.367712	-2.59605	0.00943024	NA
chr3	46463040	46463855	815	*	Promoter (<=1kb)	3	46436019	46463671	27653	2	4057	ENST00000426532.6	0	ENSG00000012223	LTF	lactotransferrin	156.274	-0.954378	0.210194	-4.54047	5.61292e-06	0.000510049
chr20	36472798	36472981	183	*	Promoter (<=1kb)	20	36473119	36500270	27152	1	22839	ENST00000479220.5	-138	ENSG00000080845	DLGAP4	DLG associated protein 4	53.3723	-0.95362	0.349024	-2.73225	0.00629042	0.0712509
chr20	3733439	3733802	363	*	Promoter (<=1kb)	20	3732711	3753111	20401	1	116835	ENST00000399701.1	729	ENSG00000132622	HSPA12B	heat shock protein family A (Hsp70) member 12B	83.2152	-0.95359	0.275104	-3.46629	0.000527689	0.0155196
chr4	185761453	185762203	750	*	Promoter (<=1kb)	4	185652695	185761590	108896	2	8470	ENST00000445343.5	0	ENSG00000154556	SORBS2	sorbin and SH3 domain containing 2	370.373	-0.953201	0.160006	-5.9573	2.56443e-09	7.70356e-07
chr11	13010916	13011049	133	*	Promoter (1-2kb)	11	13009316	13012119	2804	1	644943	ENST00000529419.3	1601	ENSG00000189431	RASSF10	Ras association domain family member 10	25.1722	-0.95316	0.480918	-1.98196	0.0474837	NA
chr10	104049332	104050275	943	*	Promoter (1-2kb)	10	104048089	104048186	98	2	100126326	ENST00000401264.1	-1147	ENSG00000283788	MIR936	microRNA 936	461.101	-0.951571	0.13305	-7.15199	8.55269e-13	6.8304e-10
chr15	88623146	88623412	266	*	Promoter (1-2kb)	15	88621381	88626611	5231	1	64782	ENST00000558327.1	1766	ENSG00000181026	AEN	apoptosis enhancing nuclease	120.434	-0.951522	0.229359	-4.14862	3.34482e-05	0.00209544
chr2	27774074	27774236	162	*	Promoter (1-2kb)	2	27772190	27779697	7508	1	9553	ENST00000476552.1	1885	ENSG00000243147	MRPL33	mitochondrial ribosomal protein L33	47.7306	-0.950386	0.349024	-2.72299	0.00646948	0.0722327
chr17	81672449	81672668	219	*	Promoter (<=1kb)	17	81671589	81672102	514	1	339230	ENST00000572531.1	861	ENSG00000185298	CCDC137	coiled-coil domain containing 137	35.4251	-0.947809	0.414085	-2.28893	0.0220837	NA
chr11	47441223	47441307	84	*	Promoter (<=1kb)	11	47437764	47441731	3968	2	5913	ENST00000528356.1	424	ENSG00000165917	RAPSN	receptor associated protein of the synapse	21.4818	-0.947307	0.51086	-1.85434	0.0636908	NA
chr15	31061202	31061384	182	*	Promoter (1-2kb)	15	31060465	31062751	2287	2	4308	ENST00000558070.1	1367	ENSG00000134160	TRPM1	transient receptor potential cation channel subfamily M member 1	28.6325	-0.947065	0.449829	-2.10539	0.0352576	NA
chr1	227815837	227816150	313	*	Promoter (<=1kb)	1	227815693	227846470	30778	1	339501	ENST00000366757.3	145	ENSG00000185888	PRSS38	serine protease 38	38.0514	-0.946984	0.412562	-2.29537	0.0217117	NA
chr18	45617230	45617819	589	*	Promoter (1-2kb)	18	45615481	45644408	28928	1	8170	ENST00000323329.3	1750	ENSG00000132874	SLC14A2	solute carrier family 14 member 2	138.778	-0.946678	0.23045	-4.10795	3.99188e-05	0.0023881
chr4	1667520	1667550	30	*	Promoter (1-2kb)	4	1640495	1668905	28411	2	152877	ENST00000461064.5	1355	ENSG00000174137	FAM53A	family with sequence similarity 53 member A	8.18555	-0.946062	0.892761	-1.0597	0.28928	NA
chr17	64190449	64190803	354	*	Promoter (1-2kb)	17	64154947	64188454	33508	2	55852	ENST00000577489.1	-1996	ENSG00000136478	TEX2	testis expressed 2	77.3482	-0.945807	0.286617	-3.2999	0.000967196	0.0228974
chr9	68405716	68405785	69	*	Promoter (<=1kb)	9	68397933	68406446	8514	2	105376070	ENST00000609241.5	661	NA	LOC105376070	uncharacterized LOC105376070	15.1603	-0.945593	0.636498	-1.48562	0.13738	NA
chrX	341920	341924	4	*	Promoter (<=1kb)	23	334235	341711	7477	2	28227	ENST00000479438.6	-210	ENSG00000167393	PPP2R3B	protein phosphatase 2 regulatory subunit B''beta	5.53604	-0.945071	1.02339	-0.923475	0.35576	NA
chr19	17686662	17687078	416	*	Promoter (1-2kb)	19	17605961	17688326	82366	2	23025	ENST00000552293.5	1248	ENSG00000130477	UNC13A	unc-13 homolog A	92.9976	-0.944336	0.258481	-3.65341	0.000258785	0.00943254
chr19	56147504	56147633	129	*	Promoter (1-2kb)	19	56146088	56147142	1055	1	55311	ENST00000591564.1	1417	ENSG00000167685	ZNF444	zinc finger protein 444	29.7872	-0.943832	0.439523	-2.1474	0.0317614	NA
chr20	34472581	34472927	346	*	Promoter (1-2kb)	20	34471501	34481182	9682	1	83737	ENST00000461661.1	1081	ENSG00000078747	ITCH	itchy E3 ubiquitin protein ligase	111.695	-0.943683	0.236962	-3.98242	6.82162e-05	0.00358531
chr16	22118992	22119102	110	*	Promoter (1-2kb)	16	22121024	22156100	35077	1	146177	ENST00000299840.10	-1922	ENSG00000175267	VWA3A	von Willebrand factor A domain containing 3A	21.3009	-0.943644	0.507798	-1.85831	0.0631255	NA
chr3	48620981	48621116	135	*	Promoter (<=1kb)	3	48620759	48621769	1011	2	440955	ENST00000330862.4	653	ENSG00000183396	TMEM89	transmembrane protein 89	24.8979	-0.943495	0.500229	-1.88613	0.0592781	NA
chr3	172305672	172305837	165	*	Promoter (1-2kb)	3	172306936	172310927	3992	1	64778	ENST00000483344.1	-1099	ENSG00000075420	FNDC3B	fibronectin type III domain containing 3B	34.0621	-0.9423	0.410696	-2.2944	0.0217678	NA
chr19	32720938	32721111	173	*	Promoter (<=1kb)	19	32720073	32790808	70736	1	91646	ENST00000421545.2	866	ENSG00000173809	TDRD12	tudor domain containing 12	30.5483	-0.941613	0.42885	-2.19567	0.0281155	NA
chr14	94322897	94322978	81	*	Promoter (<=1kb)	14	94304248	94323319	19072	2	866	ENST00000555056.1	341	ENSG00000170099	SERPINA6	serpin family A member 6	19.066	-0.9402	0.583128	-1.61234	0.106889	NA
chr11	110355422	110355601	179	*	Promoter (<=1kb)	11	110355303	110407610	52308	1	105369486	ENST00000655839.1	120	NA	LINC02732	long intergenic non-protein coding RNA 2732	25.3024	-0.93938	0.481838	-1.94958	0.0512267	NA
chr11	64592692	64592753	61	*	Promoter (1-2kb)	11	64591263	64601551	10289	1	116085	ENST00000336464.7	1430	ENSG00000197891	SLC22A12	solute carrier family 22 member 12	21.137	-0.93678	0.501479	-1.86804	0.061757	NA
chr4	10077684	10078670	986	*	Promoter (<=1kb)	4	10078611	10078692	82	2	100423011	ENST00000585238.1	22	ENSG00000264931	MIR3138	microRNA 3138	712.889	-0.935913	0.125803	-7.4395	1.01065e-13	1.0028e-10
chr1	36290794	36290962	168	*	Promoter (1-2kb)	1	36289718	36294169	4452	1	9967	ENST00000466743.1	1077	ENSG00000054118	THRAP3	thyroid hormone receptor associated protein 3	32.2304	-0.935387	0.417965	-2.23796	0.025224	NA
chr19	18137507	18137640	133	*	Promoter (<=1kb)	19	18137355	18144508	7154	1	23031	ENST00000609494.1	153	ENSG00000099308	MAST3	microtubule associated serine/threonine kinase 3	29.9683	-0.934693	0.464209	-2.01352	0.0440601	NA
chr19	6772282	6772426	144	*	Promoter (<=1kb)	19	6772708	6857361	84654	1	7409	ENST00000602142.6	-282	ENSG00000141968	VAV1	vav guanine nucleotide exchange factor 1	28.1798	-0.934203	0.449285	-2.07931	0.037589	NA
chr2	102312650	102313424	774	*	Promoter (1-2kb)	2	102311568	102338891	27324	1	9173	ENST00000447231.5	1083	ENSG00000115602	IL1RL1	interleukin 1 receptor like 1	143.96	-0.933654	0.218043	-4.28197	1.85242e-05	0.00130816
chr6	43444586	43444612	26	*	Promoter (<=1kb)	6	43445100	43447437	2338	1	89845	ENST00000372512.2	-488	ENSG00000124574	ABCC10	ATP binding cassette subfamily C member 10	19.758	-0.933405	0.518944	-1.79866	0.072072	NA
chr22	44765817	44766072	255	*	Promoter (<=1kb)	22	44765229	44786508	21280	1	23779	ENST00000469872.1	589	ENSG00000241484	ARHGAP8	Rho GTPase activating protein 8	38.3263	-0.933252	0.39995	-2.33342	0.0196261	NA
chr16	2043864	2044724	860	*	Promoter (<=1kb)	16	2039821	2044079	4259	2	4913	ENST00000562951.5	0	ENSG00000065057	NTHL1	nth like DNA glycosylase 1	623.528	-0.933059	0.161941	-5.76171	8.32679e-09	2.15818e-06
chr8	27258377	27258639	262	*	Promoter (<=1kb)	8	27235323	27258386	23064	2	81551	ENST00000350889.8	0	ENSG00000015592	STMN4	stathmin 4	49.3496	-0.932955	0.335383	-2.78176	0.00540646	0.0652041
chr9	68306401	68306424	23	*	Promoter (<=1kb)	9	68306528	68330436	23909	1	101929800	ENST00000603200.5	-104	NA	LOC101929800	uncharacterized LOC101929800	7.79312	-0.932744	0.834316	-1.11797	0.263578	NA
chr15	89999596	89999746	150	*	Promoter (1-2kb)	15	90001324	90082191	80868	1	374655	ENST00000268154.9	-1578	ENSG00000140548	ZNF710	zinc finger protein 710	33.9937	-0.932667	0.39767	-2.34533	0.0190105	NA
chr3	45146783	45147076	293	*	Promoter (<=1kb)	3	45110216	45146422	36207	2	64866	ENST00000425231.2	-362	ENSG00000163814	CDCP1	CUB domain containing protein 1	44.3493	-0.932549	0.372382	-2.50428	0.01227	0.105183
chr1	56513080	56513485	405	*	Promoter (<=1kb)	1	56496434	56513771	17338	2	8613	ENST00000459962.1	286	ENSG00000162407	PLPP3	phospholipid phosphatase 3	113.783	-0.932421	0.231346	-4.03042	5.5677e-05	0.00305495
chr19	13261126	13261611	485	*	Promoter (<=1kb)	19	13256255	13260234	3980	2	773	ENST00000636984.1	-893	ENSG00000141837	CACNA1A	calcium voltage-gated channel subunit alpha1 A	133.176	-0.93184	0.216213	-4.30982	1.63391e-05	0.00118363
chr5	176549057	176549247	190	*	Promoter (<=1kb)	5	176549391	176595768	46378	1	54825	ENST00000261944.9	-144	ENSG00000074276	CDHR2	cadherin related family member 2	36.6187	-0.931502	0.402033	-2.31698	0.0205048	NA
chr1	42932135	42932325	190	*	Promoter (<=1kb)	1	42926174	42931769	5596	2	6513	ENST00000676254.1	-367	ENSG00000117394	SLC2A1	solute carrier family 2 member 1	57.4463	-0.930681	0.318791	-2.91941	0.00350692	0.0503767
chr12	54127408	54127770	362	*	Promoter (1-2kb)	12	54126213	54142493	16281	1	400043	ENST00000635070.1	1196	ENSG00000250742	LINC02381	long intergenic non-protein coding RNA 2381	47.2054	-0.930546	0.346226	-2.68769	0.00719486	0.0771402
chr15	20280359	20280763	404	*	Promoter (1-2kb)	15	20282744	20291558	8815	1	646096	ENST00000555186.5	-1981	ENSG00000259156	CHEK2P2	CHEK2 pseudogene 2	103.165	-0.929877	0.321477	-2.89251	0.00382176	0.053053
chr8	133303041	133303721	680	*	Promoter (1-2kb)	8	133256785	133302022	45238	2	10397	ENST00000520230.5	-1020	ENSG00000104419	NDRG1	N-myc downstream regulated 1	408.907	-0.929835	0.177916	-5.22628	1.72959e-07	2.88944e-05
chr12	117048081	117048365	284	*	Promoter (1-2kb)	12	117038957	117046831	7875	2	54997	ENST00000549210.1	-1251	ENSG00000088992	TESC	tescalcin	77.8617	-0.929511	0.274831	-3.38213	0.000719272	0.0189525
chr9	133273490	133273547	57	*	Promoter (1-2kb)	9	133250732	133275214	24483	2	28	ENST00000647353.1	1667	ENSG00000175164	ABO	ABO, alpha 1-3-N-acetylgalactosaminyltransferase and alpha 1-3-galactosyltransferase	17.3775	-0.929317	0.557402	-1.66723	0.0954692	NA
chr7	76409517	76409667	150	*	Promoter (<=1kb)	7	76389337	76409697	20361	2	136853	ENST00000275560.4	30	ENSG00000146700	SSC4D	scavenger receptor cysteine rich family member with 4 domains	23.8902	-0.928936	0.481046	-1.93108	0.0534737	NA
chr3	50251311	50251676	365	*	Promoter (<=1kb)	3	50251409	50258893	7485	1	2771	ENST00000490122.5	0	ENSG00000114353	GNAI2	G protein subunit alpha i2	244.937	-0.928261	0.184611	-5.0282	4.95102e-07	6.89849e-05
chr2	172890153	172890327	174	*	Promoter (<=1kb)	2	172889801	172990925	101125	1	11069	ENST00000473043.5	353	ENSG00000091428	RAPGEF4	Rap guanine nucleotide exchange factor 4	40.9768	-0.928199	0.371244	-2.50024	0.0124108	NA
chr19	35812681	35812860	179	*	Promoter (<=1kb)	19	35799988	35812845	12858	2	58510	ENST00000653904.2	0	ENSG00000250799	PRODH2	proline dehydrogenase 2	34.2094	-0.927365	0.415708	-2.23081	0.025694	NA
chr1	29217854	29217907	53	*	Promoter (1-2kb)	1	29193874	29216613	22740	2	51102	ENST00000473030.5	-1242	ENSG00000116353	MECR	mitochondrial trans-2-enoyl-CoA reductase	15.3228	-0.926456	0.600048	-1.54397	0.122596	NA
chr19	35008947	35009203	256	*	Promoter (<=1kb)	19	35009673	35010478	806	1	57655	ENST00000599476.1	-470	ENSG00000089351	GRAMD1A	GRAM domain containing 1A	99.7533	-0.9261	0.241371	-3.83684	0.00012463	0.00562358
chr14	104953820	104953879	59	*	Promoter (1-2kb)	14	104953537	104955402	1866	2	113146	ENST00000555544.1	1523	ENSG00000185567	AHNAK2	AHNAK nucleoprotein 2	15.3424	-0.925484	0.61508	-1.50466	0.132412	NA
chr11	120208848	120209148	300	*	Promoter (1-2kb)	11	120211032	120230334	19303	1	220323	ENST00000328965.9	-1884	ENSG00000184232	OAF	out at first homolog	176.528	-0.924854	0.216668	-4.26852	1.96772e-05	0.00137062
chr3	197912885	197913091	206	*	Promoter (<=1kb)	3	197889413	197913034	23622	2	84223	ENST00000485787.1	0	ENSG00000114473	IQCG	IQ motif containing G	33.5192	-0.924844	0.429628	-2.15266	0.0313454	NA
chr8	141059614	141059782	168	*	Promoter (<=1kb)	8	141059332	141060468	1137	1	105375784	ENST00000522882.1	283	NA	LOC105375784	uncharacterized LOC105375784	32.8583	-0.924498	0.420454	-2.19881	0.0278914	NA
chr17	1606128	1606307	179	*	Promoter (<=1kb)	17	1590907	1605276	14370	2	124935	ENST00000574274.5	-853	ENSG00000167703	SLC43A2	solute carrier family 43 member 2	37.804	-0.924453	0.404745	-2.28404	0.0223693	NA
chr9	128712782	128713059	277	*	Promoter (<=1kb)	9	128713117	128720740	7624	1	29941	ENST00000483521.1	-58	ENSG00000160447	PKN3	protein kinase N3	42.0675	-0.924369	0.366275	-2.5237	0.0116127	NA
chr19	815652	815994	342	*	Promoter (<=1kb)	19	813756	814911	1156	2	79948	ENST00000517665.2	-742	ENSG00000129951	PLPPR3	phospholipid phosphatase related 3	74.1887	-0.923556	0.28861	-3.20001	0.00137421	0.0284969
chr7	26537460	26537598	138	*	Promoter (1-2kb)	7	26533121	26538788	5668	2	9808	ENST00000242109.5	1190	ENSG00000122548	KIAA0087	KIAA0087 lncRNA	24.5679	-0.923165	0.505277	-1.82705	0.0676925	NA
chr6	30171701	30171899	198	*	Promoter (1-2kb)	6	30170313	30171097	785	1	89870	ENST00000477944.1	1389	ENSG00000204610	TRIM15	tripartite motif containing 15	36.434	-0.922748	0.393613	-2.3443	0.0190628	NA
chr8	132086413	132086575	162	*	Promoter (<=1kb)	8	132024238	132085655	61418	2	729330	ENST00000262283.5	-759	ENSG00000253117	OC90	otoconin 90	21.0358	-0.92212	0.530039	-1.73972	0.0819078	NA
chr19	11848347	11848528	181	*	Promoter (<=1kb)	19	11848726	11869486	20761	1	90594	ENST00000682736.1	-198	ENSG00000171291	ZNF439	zinc finger protein 439	22.8573	-0.921878	0.493092	-1.86959	0.0615415	NA
chr19	39656652	39656789	137	*	Promoter (<=1kb)	19	39655919	39660647	4729	1	148003	ENST00000594480.1	734	ENSG00000249861	LGALS16	galectin 16	23.6854	-0.921486	0.482436	-1.91007	0.0561243	NA
chr1	233904956	233905266	310	*	Promoter (<=1kb)	1	233904676	234324511	419836	1	148641	ENST00000366618.8	281	ENSG00000183780	SLC35F3	solute carrier family 35 member F3	42.4232	-0.921392	0.374895	-2.45773	0.0139817	NA
chr6	12292236	12292604	368	*	Promoter (1-2kb)	6	12290361	12297194	6834	1	1906	ENST00000379375.6	1876	ENSG00000078401	EDN1	endothelin 1	160.452	-0.920734	0.212416	-4.33459	1.46035e-05	0.00108593
chr17	57892801	57892845	44	*	Promoter (<=1kb)	17	57862696	57892688	29993	2	404093	ENST00000407144.6	-114	ENSG00000180891	CUEDC1	CUE domain containing 1	7.03187	-0.920478	0.903309	-1.01901	0.308199	NA
chr19	17000558	17000684	126	*	Promoter (1-2kb)	19	17000206	17002530	2325	2	27151	ENST00000601637.1	1846	ENSG00000160111	CPAMD8	C3 and PZP like alpha-2-macroglobulin domain containing 8	29.2592	-0.920217	0.4454	-2.06605	0.038824	NA
chr9	111759985	111760026	41	*	Promoter (<=1kb)	9	111686173	111759533	73361	2	158401	ENST00000394779.7	-453	ENSG00000165181	SHOC1	shortage in chiasmata 1	8.21402	-0.919133	0.803751	-1.14355	0.252809	NA
chr21	41387872	41387991	119	*	Promoter (1-2kb)	21	41389543	41409390	19848	1	4600	ENST00000482953.5	-1552	ENSG00000183486	MX2	MX dynamin like GTPase 2	25.8185	-0.916675	0.467862	-1.95929	0.0500792	NA
chr3	44933115	44933540	425	*	Promoter (<=1kb)	3	44926523	44933449	6927	2	51304	ENST00000479314.1	0	ENSG00000163812	ZDHHC3	zinc finger DHHC-type palmitoyltransferase 3	85.1396	-0.916323	0.286476	-3.1986	0.00138095	0.0285764
chr20	64091757	64092051	294	*	Promoter (<=1kb)	20	64091966	64100633	8668	1	4987	ENST00000672146.2	0	ENSG00000125510	OPRL1	opioid related nociceptin receptor 1	47.865	-0.915604	0.357052	-2.56434	0.0103371	0.0950872
chr12	22700147	22700359	212	*	Promoter (<=1kb)	12	22700028	22732240	32213	1	107984516	ENST00000628326.1	120	NA	LOC107984516	uncharacterized LOC107984516	97.1739	-0.915382	0.943967	-0.969718	0.332187	0.655163
chr21	9809096	9809234	138	*	Promoter (<=1kb)	21	9806875	9809723	2849	2	441058	ENST00000623933.1	489	ENSG00000280081	LINC01667	long intergenic non-protein coding RNA 1667	29.299	-0.915143	0.444167	-2.06036	0.0393644	NA
chr5	151094112	151094227	115	*	Promoter (<=1kb)	5	151060354	151093577	33224	2	10318	ENST00000521001.1	-536	ENSG00000145901	TNIP1	TNFAIP3 interacting protein 1	32.5788	-0.914806	0.417547	-2.1909	0.0284587	NA
chr19	6444366	6444498	132	*	Promoter (<=1kb)	19	6436421	6444279	7859	2	79085	ENST00000601760.1	-88	ENSG00000125648	SLC25A23	solute carrier family 25 member 23	23.5892	-0.913981	0.492131	-1.85719	0.0632839	NA
chr19	49006046	49006266	220	*	Promoter (1-2kb)	19	49004289	49015650	11362	1	10856	ENST00000627972.1	1758	ENSG00000183207	RUVBL2	RuvB like AAA ATPase 2	39.615	-0.913958	0.375529	-2.43379	0.0149417	NA
chr1	149241291	149241519	228	*	Promoter (<=1kb)	1	149197995	149240841	42847	2	653513	ENST00000663163.1	-451	NA	LOC653513	phosphodiesterase 4D interacting protein-like	37.1302	-0.913124	0.385661	-2.36769	0.0178997	NA
chr2	85785545	85785668	123	*	Promoter (1-2kb)	2	85783600	85783677	78	2	102466516	ENST00000616741.1	-1869	ENSG00000278783	MIR6071	microRNA 6071	31.7278	-0.912993	0.413935	-2.20564	0.027409	NA
chr11	57792796	57793286	490	*	Promoter (<=1kb)	11	57793386	57797163	3778	1	1500	ENST00000682814.1	-100	ENSG00000198561	CTNND1	catenin delta 1	136.109	-0.912322	0.224196	-4.0693	4.71545e-05	0.00270247
chr6	81938429	81938691	262	*	Promoter (<=1kb)	6	81844606	81938432	93827	2	102724168	ENST00000660534.1	0	NA	LINC02542	long intergenic non-protein coding RNA 2542	68.5233	-0.912243	0.308159	-2.9603	0.00307339	0.0465538
chr22	19515175	19515428	253	*	Promoter (1-2kb)	22	19516434	19520594	4161	1	8318	ENST00000493724.1	-1006	ENSG00000093009	CDC45	cell division cycle 45	68.9268	-0.911654	0.290712	-3.13593	0.0017131	0.0327202
chr16	66801010	66801347	337	*	Promoter (<=1kb)	16	66767428	66801026	33599	2	283847	ENST00000561333.1	0	ENSG00000249961	TERB1	telomere repeat binding bouquet formation protein 1	44.6569	-0.911377	0.364298	-2.50174	0.0123586	0.105611
chr5	1075420	1075614	194	*	Promoter (<=1kb)	5	1057528	1075434	17907	2	10723	ENST00000513223.2	0	ENSG00000113504	SLC12A7	solute carrier family 12 member 7	38.8175	-0.910532	0.37723	-2.41373	0.0157902	NA
chr16	29885654	29885753	99	*	Promoter (<=1kb)	16	29876854	29886019	9166	2	26470	ENST00000568407.2	266	ENSG00000174938	SEZ6L2	seizure related 6 homolog like 2	21.2951	-0.910471	0.499922	-1.82123	0.0685724	NA
chr17	80058786	80058900	114	*	Promoter (<=1kb)	17	80058925	80067288	8364	1	55036	ENST00000571028.1	-25	ENSG00000141519	CCDC40	coiled-coil domain containing 40	26.2576	-0.908901	0.47165	-1.92706	0.0539716	NA
chr9	90998597	90998773	176	*	Promoter (1-2kb)	9	90997054	91001871	4818	1	105376144	ENST00000563268.1	1544	NA	LOC105376144	uncharacterized LOC105376144	29.6963	-0.90793	0.429264	-2.11509	0.0344226	NA
chr19	10364581	10364909	328	*	Promoter (<=1kb)	19	10362580	10365863	3284	2	7297	ENST00000525220.1	954	ENSG00000105397	TYK2	tyrosine kinase 2	62.7899	-0.907796	0.305674	-2.96982	0.00297977	0.0457507
chr19	38253290	38253629	339	*	Promoter (<=1kb)	19	38251237	38253257	2021	2	94274	ENST00000587515.5	-34	ENSG00000167641	PPP1R14A	protein phosphatase 1 regulatory inhibitor subunit 14A	71.8533	-0.907569	0.278637	-3.25718	0.00112526	0.0252019
chr12	8932946	8933345	399	*	Promoter (<=1kb)	12	8933322	8937249	3928	1	1911	ENST00000535510.1	0	ENSG00000111752	PHC1	polyhomeotic homolog 1	57.7761	-0.907408	0.347604	-2.61046	0.00904193	0.0878857
chr5	174501648	174502016	368	*	Promoter (1-2kb)	5	174503683	174526380	22698	1	101928176	ENST00000504512.5	-1667	ENSG00000249306	LINC01411	long intergenic non-protein coding RNA 1411	88.0641	-0.907246	0.316315	-2.86817	0.00412851	0.0555241
chr16	1458088	1458223	135	*	Promoter (1-2kb)	16	1457329	1459330	2002	2	1186	ENST00000564968.1	1107	ENSG00000103249	CLCN7	chloride voltage-gated channel 7	35.8659	-0.907032	0.401931	-2.25669	0.0240276	NA
chr14	35867200	35867563	363	*	Promoter (<=1kb)	14	35867777	35870393	2617	1	84312	ENST00000552849.1	-214	ENSG00000100916	BRMS1L	BRMS1 like transcriptional repressor	94.6866	-0.905526	0.280545	-3.22774	0.00124773	0.0269197
chr19	35596541	35596946	405	*	Promoter (<=1kb)	19	35596581	35601596	5016	1	102723617	ENST00000669392.1	0	ENSG00000224910	LINC01766	long intergenic non-protein coding RNA 1766	50.8923	-0.904659	0.33133	-2.73039	0.00632598	0.0715026
chr15	89758595	89758805	210	*	Promoter (1-2kb)	15	89760591	89778754	18164	1	145873	ENST00000560219.2	-1786	ENSG00000188095	MESP2	mesoderm posterior bHLH transcription factor 2	37.4931	-0.904559	0.382455	-2.36514	0.0180235	NA
chr9	95083246	95083701	455	*	Promoter (1-2kb)	9	95085208	95085304	97	1	407011	ENST00000384832.1	-1507	ENSG00000207563	MIR23B	microRNA 23b	82.1732	-0.903823	0.270475	-3.34161	0.00083293	0.0208883
chr11	44073590	44073698	108	*	Promoter (<=1kb)	11	44074630	44079607	4978	1	84680	ENST00000531940.1	-932	ENSG00000110455	ACCS	1-aminocyclopropane-1-carboxylate synthase homolog (inactive)	23.2056	-0.903398	0.497123	-1.81725	0.0691784	NA
chr16	3394692	3394728	36	*	Promoter (<=1kb)	16	3384498	3393814	9317	2	54925	ENST00000575350.2	-879	ENSG00000140987	ZSCAN32	zinc finger and SCAN domain containing 32	11.7652	-0.902526	0.675823	-1.33545	0.18173	NA
chr1	221839805	221840254	449	*	Promoter (<=1kb)	1	221819842	221840689	20848	2	101929771	ENST00000665303.1	435	NA	LINC01655	long intergenic non-protein coding RNA 1655	198.429	-0.902394	0.199399	-4.52558	6.0231e-06	0.000540324
chr15	68219797	68219944	147	*	Promoter (1-2kb)	15	68207841	68218644	10804	2	54982	ENST00000637329.1	-1154	ENSG00000128973	CLN6	CLN6 transmembrane ER protein	29.3602	-0.902371	0.459301	-1.96466	0.0494535	NA
chr17	50977057	50977608	551	*	Promoter (1-2kb)	17	50966300	50975360	9061	2	9043	ENST00000506500.1	-1698	ENSG00000008294	SPAG9	sperm associated antigen 9	86.1347	-0.901787	0.261464	-3.44899	0.000562681	0.01619
chr20	4181221	4181366	145	*	Promoter (<=1kb)	20	4181894	4187747	5854	1	54498	ENST00000494098.5	-528	ENSG00000088826	SMOX	spermine oxidase	29.8912	-0.901687	0.454683	-1.98311	0.047355	NA
chr5	652260	652405	145	*	Promoter (<=1kb)	5	653026	657093	4068	1	55722	ENST00000499639.2	-621	ENSG00000112877	CEP72	centrosomal protein 72	27.6642	-0.899655	0.447255	-2.0115	0.0442722	NA
chr7	5273981	5274114	133	*	Promoter (<=1kb)	7	5274369	5291766	17398	1	222962	ENST00000434816.5	-255	ENSG00000164638	SLC29A4	solute carrier family 29 member 4	35.0938	-0.899567	0.401092	-2.2428	0.0249099	NA
chr20	64090303	64090583	280	*	Promoter (1-2kb)	20	64091966	64100633	8668	1	4987	ENST00000672146.2	-1383	ENSG00000125510	OPRL1	opioid related nociceptin receptor 1	45.7045	-0.899467	0.354023	-2.5407	0.0110629	0.0990904
chr1	16757575	16757646	71	*	Promoter (1-2kb)	1	16758053	16758823	771	2	11223	ENST00000544155.1	1177	ENSG00000186715	MST1L	macrophage stimulating 1 like (pseudogene)	33.3605	-0.899223	0.419626	-2.14292	0.0321199	NA
chr20	35511505	35511623	118	*	Promoter (1-2kb)	20	35509998	35517531	7534	1	11190	ENST00000621352.1	1508	ENSG00000126001	CEP250	centrosomal protein 250	27.9319	-0.899142	0.446743	-2.01266	0.0441502	NA
chr15	58678824	58678974	150	*	Promoter (<=1kb)	15	58597202	58679282	82081	2	102	ENST00000396136.6	308	ENSG00000137845	ADAM10	ADAM metallopeptidase domain 10	46.8801	-0.898581	0.37935	-2.36874	0.0178488	0.13062
chr12	108816655	108816966	311	*	Promoter (<=1kb)	12	108807612	108817380	9769	2	54434	ENST00000547862.6	414	ENSG00000084112	SSH1	slingshot protein phosphatase 1	66.2351	-0.897423	0.306994	-2.92326	0.00346385	0.0499717
chr17	33292381	33292418	37	*	Promoter (<=1kb)	17	33013087	33293295	280209	2	40	ENST00000225823.7	877	ENSG00000108684	ASIC2	acid sensing ion channel subunit 2	13.2226	-0.896413	0.68353	-1.31145	0.189707	NA
chr17	21405419	21405869	450	*	Promoter (<=1kb)	17	21405136	21417170	12035	1	3768	ENST00000331718.5	284	ENSG00000184185	KCNJ12	potassium inwardly rectifying channel subfamily J member 12	261.408	-0.896388	0.159634	-5.61527	1.96261e-08	4.52556e-06
chr17	6995629	6995834	205	*	Promoter (<=1kb)	17	6996049	7010754	14706	1	239	ENST00000251535.11	-215	ENSG00000108839	ALOX12	arachidonate 12-lipoxygenase, 12S type	31.7244	-0.896337	0.415471	-2.1574	0.0309747	NA
chr2	1694459	1694659	200	*	Promoter (1-2kb)	2	1676957	1692570	15614	2	7837	ENST00000447941.5	-1890	ENSG00000130508	PXDN	peroxidasin	34.1039	-0.895338	0.408714	-2.19062	0.0284792	NA
chr15	90192280	90192395	115	*	Promoter (<=1kb)	15	90191928	90217810	25883	1	10509	ENST00000559792.5	353	ENSG00000185033	SEMA4B	semaphorin 4B	21.9876	-0.895272	0.548678	-1.63169	0.102745	NA
chr1	6535378	6535528	150	*	Promoter (1-2kb)	1	6532229	6533385	1157	2	79707	ENST00000462798.1	-1994	ENSG00000162408	NOL9	nucleolar protein 9	29.6078	-0.895199	0.428585	-2.08873	0.036732	NA
chr19	55158974	55159409	435	*	Promoter (<=1kb)	19	55158939	55177540	18602	1	101930593	ENST00000591665.1	36	NA	DNAAF3-AS1	DNAAF3 antisense RNA 1	86.1668	-0.894935	0.258292	-3.46482	0.00053059	0.015559
chr5	170312871	170313054	183	*	Promoter (<=1kb)	5	170308701	170312806	4106	2	100128059	ENST00000511921.2	-66	ENSG00000250274	LOC100128059	uncharacterized LOC100128059	43.6634	-0.894837	0.358385	-2.49686	0.0125298	0.106533
chr4	147480030	147480130	100	*	Promoter (<=1kb)	4	147480917	147544954	64038	1	1909	ENST00000324300.10	-787	ENSG00000151617	EDNRA	endothelin receptor type A	23.6498	-0.894828	0.486765	-1.83832	0.0660159	NA
chr2	217980104	217980355	251	*	Promoter (1-2kb)	2	217893473	217978934	85462	2	7145	ENST00000413280.5	-1171	ENSG00000079308	TNS1	tensin 1	84.3586	-0.894596	0.262585	-3.40688	0.000657107	0.0179351
chr10	26939248	26939507	259	*	Promoter (1-2kb)	10	26931206	26937859	6654	2	387644	ENST00000639963.1	-1390	ENSG00000283709	FAM238C	family with sequence similarity 238 member C	70.7958	-0.893672	0.387122	-2.3085	0.0209713	0.142819
chr5	134506159	134506544	385	*	Promoter (<=1kb)	5	134506552	134509229	2678	1	101927934	ENST00000515627.2	-8	ENSG00000251169	LINC01843	long intergenic non-protein coding RNA 1843	160.337	-0.893666	0.214438	-4.16749	3.07975e-05	0.00195785
chr10	133319151	133319329	178	*	Promoter (<=1kb)	10	133278657	133318823	40167	2	10844	ENST00000682123.1	-329	ENSG00000130640	TUBGCP2	tubulin gamma complex associated protein 2	28.9303	-0.893302	0.44754	-1.99603	0.0459309	NA
chr9	134525450	134525586	136	*	Promoter (1-2kb)	9	134527182	134545244	18063	1	100506532	ENST00000435284.2	-1596	NA	LOC100506532	uncharacterized LOC100506532	30.051	-0.891824	0.434322	-2.05337	0.0400366	NA
chr7	75791625	75791716	91	*	Promoter (1-2kb)	7	75769533	75789896	20364	2	10344	ENST00000394905.2	-1730	ENSG00000006606	CCL26	C-C motif chemokine ligand 26	22.5824	-0.890926	0.504558	-1.76576	0.077437	NA
chr17	2757615	2757810	195	*	Promoter (1-2kb)	17	2755705	3034207	278503	1	23108	ENST00000637138.1	1911	ENSG00000132359	RAP1GAP2	RAP1 GTPase activating protein 2	38.0444	-0.89016	0.393837	-2.26023	0.0238073	NA
chr11	75100376	75100572	196	*	Promoter (<=1kb)	11	75100563	75188233	87671	1	11309	ENST00000526660.5	0	ENSG00000137491	SLCO2B1	solute carrier organic anion transporter family member 2B1	41.9586	-0.890147	0.394043	-2.25901	0.0238829	NA
chr10	5906014	5906690	676	*	Promoter (<=1kb)	10	5906506	5909478	2973	1	84893	ENST00000494526.1	0	ENSG00000134452	FBH1	F-box DNA helicase 1	124.098	-0.889794	0.230029	-3.86819	0.000109647	0.00513627
chr1	6025310	6025532	222	*	Promoter (<=1kb)	1	6026013	6099119	73107	1	8514	ENST00000428161.6	-481	ENSG00000069424	KCNAB2	potassium voltage-gated channel subfamily A regulatory beta subunit 2	43.6127	-0.889469	0.379501	-2.34379	0.019089	0.135447
chr8	141117849	141117897	48	*	Promoter (<=1kb)	8	141117278	141141276	23999	1	22898	ENST00000519291.5	572	ENSG00000105339	DENND3	DENN domain containing 3	17.0944	-0.888629	0.558807	-1.59022	0.111784	NA
chr22	23485603	23485772	169	*	Promoter (1-2kb)	22	23462086	23486980	24895	2	388882	ENST00000320372.9	1208	ENSG00000178248	FAM230I	family with sequence similarity 230 member I	64.4412	-0.888502	0.365143	-2.4333	0.0149619	0.117879
chr4	128294506	128294764	258	*	Promoter (1-2kb)	4	128292933	128474996	182064	1	100507487	ENST00000509834.6	1574	ENSG00000251432	LINC02615	long intergenic non-protein coding RNA 2615	54.8759	-0.888447	0.323598	-2.74553	0.00604137	0.0696559
chr11	44203779	44204210	431	*	Promoter (<=1kb)	11	44204983	44237890	32908	1	2132	ENST00000683204.1	-773	ENSG00000151348	EXT2	exostosin glycosyltransferase 2	52.1156	-0.887908	0.326253	-2.72153	0.006498	0.0724523
chr7	93575601	93575712	111	*	Promoter (<=1kb)	7	93424539	93574730	150192	2	799	ENST00000649521.1	-872	ENSG00000004948	CALCR	calcitonin receptor	24.8273	-0.887874	0.476018	-1.86521	0.0621515	NA
chr1	151195328	151195560	232	*	Promoter (<=1kb)	1	151185540	151195321	9782	2	6944	ENST00000463470.1	-8	ENSG00000163159	VPS72	vacuolar protein sorting 72 homolog	93.5794	-0.887301	0.256035	-3.46554	0.000529164	0.0155341
chr8	29746441	29747262	821	*	Promoter (<=1kb)	8	29721254	29748109	26856	2	619351	ENST00000506121.3	847	ENSG00000251191	LINC00589	long intergenic non-protein coding RNA 589	286.698	-0.887131	0.180066	-4.92669	8.36345e-07	0.000106143
chrX	153941329	153941730	401	*	Promoter (<=1kb)	23	153935275	153941969	6695	2	5973	ENST00000457282.5	239	ENSG00000102032	RENBP	renin binding protein	74.8699	-0.886195	0.281547	-3.14759	0.00164622	0.0320472
chr6	41229594	41229639	45	*	Promoter (<=1kb)	6	41228955	41238882	9928	1	285852	ENST00000461240.1	640	ENSG00000188056	TREML4	triggering receptor expressed on myeloid cells like 4	15.9792	-0.886153	0.578243	-1.53249	0.125401	NA
chr1	40076747	40077147	400	*	Promoter (1-2kb)	1	40073816	40078835	5020	2	5538	ENST00000372775.2	1688	ENSG00000131238	PPT1	palmitoyl-protein thioesterase 1	72.7502	-0.885857	0.305566	-2.89906	0.00374277	0.0523653
chr11	94821500	94821636	136	*	Promoter (1-2kb)	11	94820300	94830149	9850	1	154810	ENST00000539727.1	1201	ENSG00000166025	AMOTL1	angiomotin like 1	22.8525	-0.885066	0.507713	-1.74324	0.0812913	NA
chr14	19301937	19302400	463	*	Promoter (<=1kb)	14	19301704	19316800	15097	1	101101776	ENST00000444357.5	234	ENSG00000228294	BMS1P17	BMS1 pseudogene 17	100.62	-0.884528	0.270656	-3.26808	0.00108279	0.0246129
chr2	113513954	113514157	203	*	Promoter (1-2kb)	2	113512263	113515294	3032	1	101927424	ENST00000668674.1	1692	NA	LINC01961	long intergenic non-protein coding RNA 1961	30.2281	-0.883887	0.43945	-2.01135	0.0442887	NA
chr6	158031400	158031989	589	*	Promoter (1-2kb)	6	158033490	158063872	30383	1	8871	ENST00000485863.1	-1501	ENSG00000078269	SYNJ2	synaptojanin 2	292.237	-0.883849	0.155967	-5.66692	1.45389e-08	3.56152e-06
chr1	151175142	151175305	163	*	Promoter (<=1kb)	1	151171433	151175949	4517	2	29765	ENST00000488488.1	644	ENSG00000163157	TMOD4	tropomodulin 4	36.0847	-0.883806	0.425831	-2.07548	0.0379416	NA
chr20	47990232	47990483	251	*	Promoter (<=1kb)	20	47979102	47990127	11026	2	101927457	ENST00000671461.1	-106	NA	LINC01522	long intergenic non-protein coding RNA 1522	48.1506	-0.883308	0.348485	-2.53471	0.0112541	0.099922
chr11	34525316	34525448	132	*	Promoter (<=1kb)	11	34480111	34525193	45083	2	2001	ENST00000673820.1	-124	ENSG00000135374	ELF5	E74 like ETS transcription factor 5	33.7775	-0.882279	0.431241	-2.04591	0.0407654	NA
chr19	5913970	5914507	537	*	Promoter (<=1kb)	19	5914254	5916211	1958	1	828	ENST00000588776.8	0	ENSG00000105519	CAPS	calcyphosine	137.435	-0.881617	0.215601	-4.08912	4.33007e-05	0.0025403
chr2	106138120	106138450	330	*	Promoter (<=1kb)	2	106123052	106138786	15735	2	80146	ENST00000436241.1	336	ENSG00000115652	UXS1	UDP-glucuronate decarboxylase 1	41.9182	-0.881371	0.369508	-2.38526	0.0170673	NA
chr16	2104448	2104925	477	*	Promoter (<=1kb)	16	2097728	2105398	7671	2	5310	ENST00000567946.1	473	ENSG00000008710	PKD1	polycystin 1, transient receptor potential channel interacting	99.3913	-0.880594	0.269047	-3.27301	0.00106408	0.0242971
chr11	57781693	57781921	228	*	Promoter (<=1kb)	11	57781603	57796584	14982	1	100528016	ENST00000530068.5	91	ENSG00000288534	TMX2-CTNND1	TMX2-CTNND1 readthrough (NMD candidate)	70.274	-0.880304	0.283645	-3.10354	0.00191219	0.0349724
chr9	41953071	41953232	161	*	Promoter (<=1kb)	9	41923869	41953207	29339	2	728577	ENST00000489789.3	0	ENSG00000154529	CNTNAP3B	contactin associated protein family member 3B	38.1003	-0.880193	0.40638	-2.16594	0.0303161	NA
chr19	7674174	7674638	464	*	Promoter (1-2kb)	19	7676628	7679826	3199	1	199675	ENST00000333598.7	-1990	ENSG00000183019	MCEMP1	mast cell expressed membrane protein 1	128.033	-0.879881	0.255372	-3.44549	0.000570022	0.016339
chr12	132327880	132328238	358	*	Promoter (1-2kb)	12	132247440	132329349	81910	2	50614	ENST00000424720.6	1111	ENSG00000182870	GALNT9	polypeptide N-acetylgalactosaminyltransferase 9	181.477	-0.879339	0.252074	-3.48841	0.000485901	0.0146443
chr16	2081842	2082031	189	*	Promoter (<=1kb)	16	2081930	2088692	6763	1	7249	ENST00000569930.2	0	ENSG00000103197	TSC2	TSC complex subunit 2	77.5691	-0.878973	0.288049	-3.05147	0.00227725	0.038742
chr7	5129752	5129784	32	*	Promoter (1-2kb)	7	5121239	5127795	6557	2	645700	ENST00000530367.5	-1958	ENSG00000159904	ZNF890P	zinc finger protein 890, pseudogene	15.9066	-0.878894	0.592595	-1.48313	0.13804	NA
chr3	53328175	53328282	107	*	Promoter (<=1kb)	3	53328963	53811406	482444	1	776	ENST00000637424.1	-681	ENSG00000157388	CACNA1D	calcium voltage-gated channel subunit alpha1 D	25.7626	-0.878391	0.460228	-1.9086	0.0563139	NA
chr19	6772505	6772597	92	*	Promoter (<=1kb)	19	6772708	6857361	84654	1	7409	ENST00000602142.6	-111	ENSG00000141968	VAV1	vav guanine nucleotide exchange factor 1	17.8674	-0.877756	0.590832	-1.48563	0.137378	NA
chr17	80248975	80249187	212	*	Promoter (<=1kb)	17	80248214	80252899	4686	1	284129	ENST00000575019.1	762	ENSG00000181045	SLC26A11	solute carrier family 26 member 11	45.9214	-0.877661	0.361485	-2.42793	0.0151852	0.118892
chr7	155369360	155369464	104	*	Promoter (1-2kb)	7	155356985	155367934	10950	2	338436	ENST00000378120.5	-1427	ENSG00000204960	BLACE	B cell acute lymphoblastic leukemia expressed	19.7992	-0.877362	0.550204	-1.59461	0.110799	NA
chr17	38472635	38472864	229	*	Promoter (<=1kb)	17	38471939	38482558	10620	1	57636	ENST00000616909.1	697	ENSG00000275832	ARHGAP23	Rho GTPase activating protein 23	44.4704	-0.877252	0.360269	-2.43499	0.0148921	0.117583
chr21	44348981	44349228	247	*	Promoter (<=1kb)	21	44350163	44443081	92919	1	7226	ENST00000300482.9	-935	ENSG00000142185	TRPM2	transient receptor potential cation channel subfamily M member 2	57.9596	-0.876841	0.312572	-2.80525	0.00502782	0.0625649
chr12	131918699	131918859	160	*	Promoter (<=1kb)	12	131919241	131921951	2711	1	8408	ENST00000544718.1	-382	ENSG00000177169	ULK1	unc-51 like autophagy activating kinase 1	53.8941	-0.876306	0.331385	-2.64438	0.00818414	0.0829998
chr2	237694475	237694871	396	*	Promoter (1-2kb)	2	237692494	237735676	43183	1	9208	ENST00000473815.1	1982	ENSG00000124831	LRRFIP1	LRR binding FLII interacting protein 1	195.263	-0.875469	0.203043	-4.31175	1.6197e-05	0.00117594
chr19	48461883	48462033	150	*	Promoter (<=1kb)	19	48461249	48466980	5732	1	3770	ENST00000391884.2	635	ENSG00000182324	KCNJ14	potassium inwardly rectifying channel subfamily J member 14	28.03	-0.874939	0.456054	-1.9185	0.0550479	NA
chr22	45226625	45227211	586	*	Promoter (<=1kb)	22	45195828	45226903	31076	2	23313	ENST00000391627.6	0	ENSG00000100364	KIAA0930	KIAA0930	152.55	-0.874895	0.209663	-4.17286	3.00805e-05	0.00191856
chr17	41763037	41763211	174	*	Promoter (<=1kb)	17	41758172	41763077	4906	2	3728	ENST00000585793.1	0	ENSG00000173801	JUP	junction plakoglobin	29.4663	-0.87454	0.432912	-2.02013	0.0433694	NA
chr7	38976082	38976306	224	*	Promoter (1-2kb)	7	38977909	39468601	490693	1	11281	ENST00000518318.7	-1603	ENSG00000106536	POU6F2	POU class 6 homeobox 2	29.014	-0.873847	0.436796	-2.00058	0.0454373	NA
chr2	237432786	237433220	434	*	Promoter (1-2kb)	2	237428920	237434822	5903	2	1293	ENST00000409910.1	1602	ENSG00000163359	COL6A3	collagen type VI alpha 3 chain	78.0178	-0.87356	0.314691	-2.77593	0.00550449	0.065796
chr6	42916540	42916910	370	*	Promoter (<=1kb)	6	42916053	42925838	9786	1	171558	ENST00000304672.6	488	ENSG00000171611	PTCRA	pre T cell antigen receptor alpha	41.7155	-0.873533	0.381513	-2.28966	0.0220412	NA
chr19	36121682	36121968	286	*	Promoter (<=1kb)	19	36121895	36125945	4051	1	1155	ENST00000468156.1	0	ENSG00000105254	TBCB	tubulin folding cofactor B	46.1569	-0.873533	0.359815	-2.42773	0.0151936	0.118892
chr13	113917227	113917384	157	*	Promoter (1-2kb)	13	113915941	113920995	5055	1	643365	ENST00000671032.1	1287	ENSG00000229373	LINC00452	long intergenic non-protein coding RNA 452	37.4353	-0.873468	0.402248	-2.17147	0.029896	NA
chr8	7462374	7462586	212	*	Promoter (<=1kb)	8	7447753	7462857	15105	2	10407	ENST00000528767.1	271	ENSG00000164871	SPAG11B	sperm associated antigen 11B	41.9816	-0.873347	0.37851	-2.30733	0.0210365	NA
chr2	168802277	168802751	474	*	Promoter (<=1kb)	2	168802592	168831533	28942	1	115677	ENST00000439509.5	0	ENSG00000163072	NOSTRIN	nitric oxide synthase trafficking	106.912	-0.872911	0.251023	-3.47742	0.000506268	0.015073
chr6	110476053	110476158	105	*	Promoter (<=1kb)	6	110424756	110476204	51449	2	85413	ENST00000330550.8	46	ENSG00000004809	SLC22A16	solute carrier family 22 member 16	20.941	-0.87245	0.526425	-1.65731	0.0974567	NA
chr19	43779532	43779667	135	*	Promoter (1-2kb)	19	43766533	43780973	14441	2	3783	ENST00000648319.1	1306	ENSG00000104783	KCNN4	potassium calcium-activated channel subfamily N member 4	49.8705	-0.872304	0.363547	-2.39943	0.0164207	0.124751
chr10	49397546	49397589	43	*	Promoter (1-2kb)	10	49364066	49396089	32024	2	644168	ENST00000374139.8	-1458	ENSG00000165606	DRGX	dorsal root ganglia homeobox	19.5282	-0.87161	0.52959	-1.64582	0.0998006	NA
chr9	138200861	138201552	691	*	Promoter (1-2kb)	9	138199933	138203325	3393	2	101928932	ENST00000428088.1	1773	ENSG00000237419	LOC101928932	uncharacterized LOC101928932	100.206	-0.871577	0.242661	-3.59175	0.000328468	0.0111261
chr19	46428624	46428715	91	*	Promoter (<=1kb)	19	46424697	46428936	4240	2	110806277	ENST00000617053.3	221	ENSG00000277531	PNMA8C	PNMA family member 8C	16.3211	-0.870714	0.582891	-1.49379	0.135232	NA
chr19	8541762	8542072	310	*	Promoter (<=1kb)	19	8530482	8541956	11475	2	4542	ENST00000598005.2	0	ENSG00000142347	MYO1F	myosin IF	48.4493	-0.87063	0.344445	-2.52763	0.0114835	0.101251
chr22	35638434	35638870	436	*	Promoter (<=1kb)	22	35610884	35637951	27068	2	4151	ENST00000447607.5	-484	ENSG00000198125	MB	myoglobin	193.909	-0.870401	0.222976	-3.90356	9.47879e-05	0.00460035
chr19	35767054	35767787	733	*	Promoter (<=1kb)	19	35766768	35768545	1778	1	148137	ENST00000646935.1	287	ENSG00000167595	PROSER3	proline and serine rich 3	107.577	-0.870334	0.262688	-3.31318	0.000922406	0.0222408
chr1	21294414	21294652	238	*	Promoter (<=1kb)	1	21272832	21294424	21593	2	1889	ENST00000527991.2	0	ENSG00000117298	ECE1	endothelin converting enzyme 1	74.2034	-0.869656	0.275831	-3.15286	0.00161681	0.0317142
chr1	235595328	235595612	284	*	Promoter (<=1kb)	1	235550832	235595479	44648	2	2786	ENST00000366597.5	0	ENSG00000168243	GNG4	G protein subunit gamma 4	42.9899	-0.869205	0.367499	-2.36519	0.0180209	0.131272
chr10	133324170	133324440	270	*	Promoter (1-2kb)	10	133325428	133326175	748	2	50632	ENST00000467433.5	1735	ENSG00000130643	CALY	calcyon neuron specific vesicular protein	91.7175	-0.869184	0.252492	-3.44243	0.000576523	0.0164629
chr22	41674326	41674679	353	*	Promoter (1-2kb)	22	41673934	41676323	2390	2	4809	ENST00000648161.1	1644	ENSG00000100138	SNU13	small nuclear ribonucleoprotein 13	62.8205	-0.869005	0.313232	-2.77432	0.00553177	0.0660658
chr22	30408770	30409310	540	*	Promoter (<=1kb)	22	30409022	30416007	6986	1	23541	ENST00000483116.5	0	ENSG00000100003	SEC14L2	SEC14 like lipid binding 2	270.732	-0.86899	0.448671	-1.93681	0.0527687	0.243793
chr2	85433703	85434104	401	*	Promoter (<=1kb)	2	85434066	85437027	2962	1	284948	ENST00000477170.5	0	ENSG00000152292	SH2D6	SH2 domain containing 6	201.783	-0.868987	0.179007	-4.85447	1.20708e-06	0.000144074
chr2	241778260	241778282	22	*	Promoter (1-2kb)	2	241776822	241804287	27466	1	64090	ENST00000192314.7	1439	ENSG00000154252	GAL3ST2	galactose-3-O-sulfotransferase 2	10.8324	-0.868809	0.71431	-1.21629	0.223874	NA
chr20	61980439	61980609	170	*	Promoter (<=1kb)	20	61975859	61981432	5574	2	6874	ENST00000608458.1	823	ENSG00000130699	TAF4	TATA-box binding protein associated factor 4	34.8839	-0.868664	0.422231	-2.05732	0.0396555	NA
chr6	46921858	46922113	255	*	Promoter (<=1kb)	6	46852522	46921938	69417	2	221395	ENST00000283296.12	0	ENSG00000069122	ADGRF5	adhesion G protein-coupled receptor F5	81.3086	-0.868647	0.271604	-3.19821	0.00138284	0.0285974
chr1	41627062	41627284	222	*	Promoter (1-2kb)	1	41585306	41628816	43511	2	59269	ENST00000646142.1	1532	ENSG00000127124	HIVEP3	HIVEP zinc finger 3	42.1734	-0.868546	0.371287	-2.33929	0.0193206	NA
chr14	24036000	24036102	102	*	Promoter (<=1kb)	14	24036453	24051028	14576	1	728635	ENST00000559270.5	-351	ENSG00000284807	DHRS4L1	dehydrogenase/reductase 4 like 1	18.7464	-0.867368	0.542069	-1.60011	0.109575	NA
chr7	154053456	154053757	301	*	Promoter (1-2kb)	7	154052418	154588631	536214	1	1804	ENST00000406326.5	1039	ENSG00000130226	DPP6	dipeptidyl peptidase like 6	42.106	-0.866961	0.378211	-2.29227	0.0218902	NA
chr7	157516390	157516516	126	*	Promoter (<=1kb)	7	157515793	157518658	2866	1	105375610	ENST00000648425.1	598	NA	LOC105375610	uncharacterized LOC105375610	32.2507	-0.866897	0.415933	-2.08422	0.0371397	NA
chr2	239157427	239157592	165	*	Promoter (1-2kb)	2	239134349	239155575	21227	2	9759	ENST00000553145.1	-1853	ENSG00000068024	HDAC4	histone deacetylase 4	85.3301	-0.866413	0.284014	-3.0506	0.00228388	0.038801
chr1	161200453	161200556	103	*	Promoter (1-2kb)	1	161201666	161214302	12637	1	4720	ENST00000676991.1	-1110	ENSG00000158864	NDUFS2	NADH:ubiquinone oxidoreductase core subunit S2	65.3069	-0.866383	0.297894	-2.90836	0.0036333	0.0515383
chr19	40379569	40379762	193	*	Promoter (1-2kb)	19	40377860	40380439	2580	1	23646	ENST00000486134.1	1710	ENSG00000105223	PLD3	phospholipase D family member 3	48.4276	-0.865288	0.352215	-2.45671	0.0140217	0.113556
chr16	89748630	89748715	85	*	Promoter (1-2kb)	16	89744687	89749796	5110	2	2175	ENST00000568983.5	1081	ENSG00000187741	FANCA	FA complementation group A	22.9148	-0.864906	0.497974	-1.73685	0.0824137	NA
chr1	16631387	16631510	123	*	Promoter (<=1kb)	1	16618256	16631109	12854	2	84809	ENST00000639594.1	-279	ENSG00000215908	CROCCP2	CROCC pseudogene 2	69.41	-0.864821	0.306671	-2.82003	0.00480189	0.0608323
chr13	44108392	44108707	315	*	Promoter (<=1kb)	13	44105488	44108684	3197	2	105370183	ENST00000654658.1	0	NA	LINC00390	long intergenic non-protein coding RNA 390	99.452	-0.864469	0.639748	-1.35127	0.17661	0.481117
chr13	19344916	19345070	154	*	Promoter (<=1kb)	13	19262802	19344973	82172	2	100101938	ENST00000673904.1	0	ENSG00000237636	ANKRD26P3	ankyrin repeat domain 26 pseudogene 3	30.4055	-0.863929	0.424299	-2.03613	0.0417369	NA
chr3	57659360	57659653	293	*	Promoter (1-2kb)	3	57634704	57660826	26123	2	201627	ENST00000477344.1	1173	ENSG00000174839	DENND6A	DENN domain containing 6A	52.4714	-0.86386	0.335104	-2.57788	0.00994076	0.0930106
chr15	58038609	58038696	87	*	Promoter (<=1kb)	15	57992783	58038582	45800	2	8854	ENST00000559266.5	-28	ENSG00000128918	ALDH1A2	aldehyde dehydrogenase 1 family member A2	16.5433	-0.863736	0.577119	-1.49663	0.134489	NA
chr2	172329548	172330418	870	*	Promoter (<=1kb)	2	172323260	172330582	7323	2	105373742	ENST00000668498.1	164	NA	LOC105373742	uncharacterized LOC105373742	357.308	-0.863067	0.143653	-6.00801	1.87819e-09	5.91334e-07
chr11	61273666	61274042	376	*	Promoter (<=1kb)	11	61258624	61273806	15183	2	220001	ENST00000535710.1	0	ENSG00000167992	VWCE	von Willebrand factor C and EGF domains	64.513	-0.862807	0.298542	-2.89007	0.00385161	0.0532661
chr22	44786129	44786476	347	*	Promoter (<=1kb)	22	44786457	44862784	76328	1	23779	ENST00000389772.8	0	ENSG00000241484	ARHGAP8	Rho GTPase activating protein 8	54.2582	-0.862714	0.35243	-2.4479	0.014369	0.115264
chr17	73261986	73262265	279	*	Promoter (<=1kb)	17	73249793	73262352	12560	2	642843	ENST00000397671.1	87	ENSG00000187959	CPSF4L	cleavage and polyadenylation specific factor 4 like	47.3307	-0.862434	0.348657	-2.47359	0.0133764	0.110529
chr3	52422557	52422592	35	*	Promoter (1-2kb)	3	52421016	52422857	1842	1	51533	ENST00000459935.1	1542	ENSG00000010318	PHF7	PHD finger protein 7	9.58865	-0.862336	0.755853	-1.14088	0.253921	NA
chr1	60825639	60825890	251	*	Promoter (<=1kb)	1	60659631	60825584	165954	2	101926964	ENST00000423403.1	-56	ENSG00000231252	LOC101926964	uncharacterized LOC101926964	72.9738	-0.861909	0.295105	-2.92068	0.00349266	0.0502546
chr17	47820144	47820322	178	*	Promoter (<=1kb)	17	47807374	47820858	13485	2	114881	ENST00000579728.5	536	ENSG00000006025	OSBPL7	oxysterol binding protein like 7	65.7159	-0.859939	0.290125	-2.96403	0.0030364	0.0461682
chr3	125019288	125019596	308	*	Promoter (<=1kb)	3	124967497	125019412	51916	2	57493	ENST00000650592.1	0	ENSG00000173706	HEG1	heart development protein with EGF like domains 1	58.4303	-0.8599	0.311235	-2.76286	0.00572966	0.0674938
chr2	236455300	236455475	175	*	Promoter (<=1kb)	2	236392329	236455111	62783	2	79781	ENST00000465621.1	-190	ENSG00000132321	IQCA1	IQ motif containing with AAA domain 1	27.0033	-0.859512	0.464705	-1.84959	0.0643728	NA
chr12	541314	541541	227	*	Promoter (<=1kb)	12	540463	548301	7839	1	283358	ENST00000544638.5	852	ENSG00000139044	B4GALNT3	beta-1,4-N-acetyl-galactosaminyltransferase 3	65.7272	-0.859425	0.294152	-2.9217	0.00348125	0.0501638
chr11	68714203	68714297	94	*	Promoter (1-2kb)	11	68707559	68715934	8376	2	9633	ENST00000543240.1	1637	ENSG00000132749	TESMIN	testis expressed metallothionein like protein	24.4952	-0.859087	0.480087	-1.78944	0.0735441	NA
chr1	16658264	16658555	291	*	Promoter (1-2kb)	1	16618969	16657232	38264	2	84809	ENST00000412962.4	-1033	ENSG00000215908	CROCCP2	CROCC pseudogene 2	70.3277	-0.858806	0.334454	-2.56779	0.010235	0.0944643
chr13	114200182	114200960	778	*	Promoter (<=1kb)	13	114199704	114222600	22897	1	101929355	ENST00000635874.1	479	ENSG00000283361	CFAP97D2	CFAP97 domain containing 2	95.1084	-0.858516	0.288367	-2.97716	0.00290931	0.0450622
chr8	26628665	26628940	275	*	Promoter (1-2kb)	8	26627215	26643145	15931	1	1808	ENST00000521983.1	1451	ENSG00000092964	DPYSL2	dihydropyrimidinase like 2	66.7558	-0.8584	0.303143	-2.83167	0.00463054	0.059428
chr1	33570745	33570835	90	*	Promoter (1-2kb)	1	33559353	33572590	13238	2	114784	ENST00000465819.1	1755	ENSG00000121904	CSMD2	CUB and Sushi multiple domains 2	18.6146	-0.857874	0.538523	-1.59301	0.111157	NA
chr6	35795071	35795295	224	*	Promoter (1-2kb)	6	35794982	35796850	1869	2	1208	ENST00000622413.2	1555	ENSG00000137392	CLPS	colipase	57.7347	-0.857576	0.320554	-2.6753	0.0074663	0.0786904
chr9	209424	209684	260	*	Promoter (<=1kb)	9	197065	209554	12490	2	105375943	ENST00000657756.1	0	NA	LOC105375943	uncharacterized LOC105375943	48.0071	-0.85697	0.350087	-2.44788	0.0143701	0.115264
chr11	109422407	109422553	146	*	Promoter (<=1kb)	11	109422190	109429167	6978	1	399947	ENST00000327419.7	218	ENSG00000185742	C11orf87	chromosome 11 open reading frame 87	22.6761	-0.856844	0.502078	-1.7066	0.0878972	NA
chr5	33984319	33984419	100	*	Promoter (<=1kb)	5	33947268	33984237	36970	2	51151	ENST00000510600.1	-83	ENSG00000164175	SLC45A2	solute carrier family 45 member 2	16.2	-0.856459	0.589281	-1.4534	0.146113	NA
chr12	49910191	49910276	85	*	Promoter (1-2kb)	12	49908882	49911278	2397	2	283332	ENST00000546911.5	1002	ENSG00000258135	LINC02396	long intergenic non-protein coding RNA 2396	10.5254	-0.856384	0.740357	-1.15672	0.247388	NA
chr7	30750880	30751200	320	*	Promoter (<=1kb)	7	30752135	30757602	5468	1	11185	ENST00000013222.5	-935	ENSG00000241644	INMT	indolethylamine N-methyltransferase	79.0063	-0.855952	0.276756	-3.0928	0.00198277	0.0357193
chr15	57680112	57680386	274	*	Promoter (<=1kb)	15	57680698	57714745	34048	1	145781	ENST00000484300.1	-312	ENSG00000137878	GCOM1	GCOM1, MYZAP-POLR2M combined locus	67.9167	-0.855939	0.299904	-2.85404	0.00431669	0.0569401
chr16	84453247	84453321	74	*	Promoter (<=1kb)	16	84453236	84463730	10495	1	9914	ENST00000567892.5	12	ENSG00000064270	ATP2C2	ATPase secretory pathway Ca2+ transporting 2	13.9387	-0.855884	0.674113	-1.26964	0.204212	NA
chr22	16591962	16592218	256	*	Promoter (<=1kb)	22	16590751	16592810	2060	2	150160	ENST00000359963.4	592	ENSG00000198445	CCT8L2	chaperonin containing TCP1 subunit 8 like 2	39.9517	-0.855807	0.371874	-2.30134	0.0213726	NA
chr22	26493774	26493938	164	*	Promoter (<=1kb)	22	26491927	26494619	2693	2	24144	ENST00000492137.1	681	ENSG00000100109	TFIP11	tuftelin interacting protein 11	31.6597	-0.855747	0.452452	-1.89135	0.0585771	NA
chr9	124000228	124000417	189	*	Promoter (1-2kb)	9	124001670	124015361	13692	1	9355	ENST00000560961.2	-1253	ENSG00000106689	LHX2	LIM homeobox 2	36.802	-0.855181	0.397509	-2.15135	0.0314485	NA
chr12	107775429	107775723	294	*	Promoter (<=1kb)	12	107774704	107776644	1941	1	121549	ENST00000342331.5	726	ENSG00000187855	ASCL4	achaete-scute family bHLH transcription factor 4	39.3911	-0.854835	0.392292	-2.17908	0.0293257	NA
chr4	119238152	119238630	478	*	Promoter (<=1kb)	4	119239216	119295517	56302	1	54532	ENST00000450251.5	-586	ENSG00000145390	USP53	ubiquitin specific peptidase 53	124.757	-0.854701	0.272108	-3.14103	0.00168353	0.0324193
chr9	6562928	6563445	517	*	Promoter (1-2kb)	9	6557920	6565439	7520	2	2731	ENST00000460457.2	1994	ENSG00000178445	GLDC	glycine decarboxylase	250.413	-0.854691	0.21565	-3.96332	7.39158e-05	0.00381546
chr16	70143565	70143752	187	*	Promoter (1-2kb)	16	70145727	70156682	10956	1	55066	ENST00000569042.5	-1975	ENSG00000090857	PDPR	pyruvate dehydrogenase phosphatase regulatory subunit	55.9927	-0.854685	0.356723	-2.39594	0.016578	0.125383
chr17	57523966	57524167	201	*	Promoter (<=1kb)	17	57524309	57529724	5416	1	124540	ENST00000676345.1	-142	ENSG00000153944	MSI2	musashi RNA binding protein 2	52.1412	-0.854516	0.346489	-2.46621	0.0136551	0.111851
chr4	11769440	11769682	242	*	Promoter (<=1kb)	4	11740948	11769468	28521	2	105374484	ENST00000506195.1	0	ENSG00000248300	LINC02360	long intergenic non-protein coding RNA 2360	48.0245	-0.854492	0.369001	-2.31569	0.0205751	0.14134
chr19	2927114	2927136	22	*	Promoter (<=1kb)	19	2908371	2926817	18447	2	101928631	ENST00000654521.1	-298	NA	LOC101928631	uncharacterized LOC101928631	9.26225	-0.854384	0.80722	-1.05843	0.289861	NA
chr8	55102169	55102370	201	*	Promoter (<=1kb)	8	55102457	55526149	423693	1	114786	ENST00000622811.1	-87	ENSG00000206579	XKR4	XK related 4	25.3109	-0.853307	0.463293	-1.84183	0.0655	NA
chr19	16889323	16889805	482	*	Promoter (<=1kb)	19	16889190	16890080	891	1	9002	ENST00000599210.1	134	ENSG00000127533	F2RL3	F2R like thrombin or trypsin receptor 3	213.589	-0.852971	0.176299	-4.83821	1.31017e-06	0.000153946
chr13	18194113	18194594	481	*	Promoter (<=1kb)	13	18195297	18232024	36728	1	26080	ENST00000623511.1	-703	ENSG00000279516	FAM230C	family with sequence similarity 230 member C	113.961	-0.852914	0.262984	-3.24322	0.00118186	0.0259864
chr22	23989098	23990321	1223	*	Promoter (1-2kb)	22	23976872	23991421	14550	2	25774	ENST00000437021.2	1100	ENSG00000276950	GSTT4	glutathione S-transferase theta 4	207.932	-0.852685	0.186694	-4.56729	4.94074e-06	0.000458294
chr20	10596985	10597162	177	*	Promoter (1-2kb)	20	10598675	10636829	38155	1	128710	ENST00000488816.1	-1513	ENSG00000149346	SLX4IP	SLX4 interacting protein	43.1099	-0.852513	0.369419	-2.30771	0.0210153	0.14301
chr2	38076064	38077457	1393	*	Promoter (<=1kb)	2	38067509	38076151	8643	2	1545	ENST00000610745.5	0	ENSG00000138061	CYP1B1	cytochrome P450 family 1 subfamily B member 1	482.441	-0.85216	0.149395	-5.70409	1.16966e-08	2.91617e-06
chr18	77250870	77250896	26	*	Promoter (1-2kb)	18	77249848	77277900	28053	1	2587	ENST00000299727.5	1023	ENSG00000166573	GALR1	galanin receptor 1	8.48704	-0.851865	0.846936	-1.00582	0.314503	NA
chr19	37778805	37778912	107	*	Promoter (<=1kb)	19	37740084	37779553	39470	2	126231	ENST00000591516.6	641	ENSG00000189144	ZNF573	zinc finger protein 573	20.8815	-0.851338	0.536205	-1.58771	0.112352	NA
chrX	154620052	154620157	105	*	Promoter (<=1kb)	23	154617609	154619282	1674	2	1485	ENST00000359887.4	-771	ENSG00000184033	CTAG1B	cancer/testis antigen 1B	19.6642	-0.851069	0.517171	-1.64562	0.099841	NA
chr9	68324561	68324809	248	*	Promoter (<=1kb)	9	68323607	68330626	7020	1	101929800	ENST00000414223.4	955	NA	LOC101929800	uncharacterized LOC101929800	36.2841	-0.850662	0.391446	-2.17313	0.0297705	NA
chr17	82667744	82667745	1	*	Promoter (<=1kb)	17	82668233	82668307	75	2	100616196	ENST00000580000.1	562	ENSG00000266107	MIR4525	microRNA 4525	9.79711	-0.850322	0.743653	-1.14344	0.252856	NA
chr11	679667	679841	174	*	Promoter (<=1kb)	11	674372	678779	4408	2	10522	ENST00000526790.1	-889	ENSG00000177030	DEAF1	DEAF1 transcription factor	27.9753	-0.850322	0.444526	-1.91287	0.0557644	NA
chr3	192514940	192515091	151	*	Promoter (<=1kb)	3	192515022	192516573	1552	1	100873987	ENST00000443165.1	0	ENSG00000230126	FGF12-AS2	FGF12 antisense RNA 2	19.5871	-0.850311	0.533245	-1.5946	0.110802	NA
chr19	377965	378410	445	*	Promoter (1-2kb)	19	361747	376026	14280	2	51298	ENST00000342640.9	-1940	ENSG00000105549	THEG	theg spermatid protein	69.5532	-0.849324	0.296615	-2.86339	0.00419132	0.0559779
chr21	38907260	38907433	173	*	Promoter (1-2kb)	21	38877774	38905459	27686	2	400867	ENST00000654496.1	-1802	NA	LOC400867	uncharacterized LOC400867	46.4838	-0.849147	0.362115	-2.34496	0.0190289	0.135142
chr17	76579378	76579497	119	*	Promoter (<=1kb)	17	76574481	76578983	4503	2	10610	ENST00000592508.1	-396	ENSG00000070731	ST6GALNAC2	ST6 N-acetylgalactosaminide alpha-2,6-sialyltransferase 2	26.7038	-0.849125	0.459753	-1.84691	0.0647595	NA
chr1	246417448	246417701	253	*	Promoter (<=1kb)	1	245749342	246417409	668068	2	64754	ENST00000630181.2	-40	ENSG00000185420	SMYD3	SET and MYND domain containing 3	46.0045	-0.848984	0.347823	-2.44085	0.0146528	0.11649
chr22	15747976	15748259	283	*	Promoter (1-2kb)	22	15746630	15778297	31668	1	106146148	ENST00000453395.5	1347	NA	PSLNR	prostate enriched lncRNA	43.7259	-0.848556	0.357155	-2.37588	0.0175072	0.129353
chr22	46171074	46172101	1027	*	Promoter (<=1kb)	22	46171284	46198410	27127	1	5465	ENST00000484619.1	0	ENSG00000186951	PPARA	peroxisome proliferator activated receptor alpha	187.139	-0.848151	0.181349	-4.67689	2.91255e-06	0.00030166
chr2	130036931	130037249	318	*	Promoter (1-2kb)	2	130034788	130035436	649	2	440905	ENST00000428123.1	-1496	ENSG00000286058	FAR2P1	fatty acyl-CoA reductase 2 pseudogene 1	42.9529	-0.848059	0.360453	-2.35276	0.0186348	0.133706
chr11	1251488	1251694	206	*	Promoter (1-2kb)	11	1242261	1249676	7416	2	112577518	ENST00000532061.2	-1813	ENSG00000255177	MUC5B-AS1	MUC5B antisense RNA 1	43.5047	-0.847786	0.387109	-2.19005	0.0285209	0.1708
chr11	122105519	122105660	141	*	Promoter (<=1kb)	11	122089232	122105616	16385	2	399959	ENST00000658364.1	0	ENSG00000255248	MIR100HG	mir-100-let-7a-2-mir-125b-1 cluster host gene	46.2244	-0.847659	0.366812	-2.31088	0.0208395	0.142346
chr1	107141947	107142133	186	*	Promoter (<=1kb)	1	107141369	107148807	7439	1	22854	ENST00000462149.1	579	ENSG00000162631	NTNG1	netrin G1	20.3325	-0.847164	0.5124	-1.65333	0.0982647	NA
chr2	72824511	72824735	224	*	Promoter (1-2kb)	2	72496454	72826005	329552	2	23233	ENST00000410112.6	1270	ENSG00000144036	EXOC6B	exocyst complex component 6B	65.0631	-0.846694	0.301039	-2.81257	0.00491468	0.0616964
chr14	88323887	88323989	102	*	Promoter (<=1kb)	14	88240702	88323725	83024	2	54207	ENST00000556282.1	-163	ENSG00000100433	KCNK10	potassium two pore domain channel subfamily K member 10	22.6501	-0.846378	0.50947	-1.66129	0.0966546	NA
chr13	29496255	29496564	309	*	Promoter (<=1kb)	13	29496347	29503140	6794	1	23281	ENST00000400542.3	0	ENSG00000132938	MTUS2	microtubule associated scaffold protein 2	51.5347	-0.846336	0.330666	-2.55949	0.0104827	0.095925
chr1	156816709	156816987	278	*	Promoter (<=1kb)	1	156806243	156816834	10592	2	9047	ENST00000368198.7	0	ENSG00000027869	SH2D2A	SH2 domain containing 2A	62.6908	-0.846123	0.313116	-2.70227	0.00688688	0.0751172
chr6	166507640	166507758	118	*	Promoter (1-2kb)	6	166509354	166509433	80	2	100302141	ENST00000411026.1	1675	ENSG00000222958	MIR1913	microRNA 1913	30.1416	-0.846098	0.436597	-1.93794	0.0526309	NA
chr19	5935843	5935980	137	*	Promoter (1-2kb)	19	5917322	5934462	17141	2	8498	ENST00000586344.5	-1382	ENSG00000031823	RANBP3	RAN binding protein 3	32.9647	-0.846022	0.418796	-2.02013	0.0433702	NA
chr7	29287367	29287678	311	*	Promoter (1-2kb)	7	29288881	29400781	111901	1	1124	ENST00000409922.5	-1203	ENSG00000106069	CHN2	chimerin 2	120.413	-0.845736	0.288881	-2.92763	0.00341557	0.0496108
chr5	160231064	160231227	163	*	Promoter (<=1kb)	5	160232035	160238716	6682	1	2172	ENST00000521362.1	-808	ENSG00000170231	FABP6	fatty acid binding protein 6	33.8648	-0.845625	0.40016	-2.11321	0.0345824	NA
chr6	36956033	36956520	487	*	Promoter (1-2kb)	6	36954738	36964837	10100	1	221476	ENST00000373674.4	1296	ENSG00000164530	PI16	peptidase inhibitor 16	114.575	-0.84455	0.22908	-3.6867	0.000227185	0.00863979
chr19	53824173	53824354	181	*	Promoter (<=1kb)	19	53793741	53824314	30574	2	91662	ENST00000324134.11	0	ENSG00000142405	NLRP12	NLR family pyrin domain containing 12	27.7101	-0.843931	0.44777	-1.88474	0.0594648	NA
chr7	102550823	102551334	511	*	Promoter (<=1kb)	7	102551232	102562069	10838	1	441273	ENST00000507918.5	0	ENSG00000205238	SPDYE2	speedy/RINGO cell cycle regulator family member E2	100.246	-0.843748	0.239972	-3.51602	0.00043807	0.0136026
chr7	151472260	151473094	834	*	Promoter (<=1kb)	7	151471404	151472067	664	2	6009	ENST00000482053.1	-194	ENSG00000106615	RHEB	Ras homolog, mTORC1 binding	402.468	-0.843551	0.176301	-4.78471	1.71235e-06	0.000192016
chr18	77251018	77251331	313	*	Promoter (1-2kb)	18	77249848	77277900	28053	1	2587	ENST00000299727.5	1171	ENSG00000166573	GALR1	galanin receptor 1	47.6337	-0.843534	0.365666	-2.30685	0.0210634	0.143153
chr7	2644606	2644914	308	*	Promoter (<=1kb)	7	2645532	2647176	1645	1	80727	ENST00000400376.2	-618	ENSG00000136295	TTYH3	tweety family member 3	160.599	-0.843155	0.203428	-4.14474	3.40198e-05	0.00212507
chr8	22156289	22156400	111	*	Promoter (<=1kb)	8	22151892	22156677	4786	2	203190	ENST00000518365.1	277	ENSG00000168481	LGI3	leucine rich repeat LGI family member 3	35.6705	-0.843048	0.403584	-2.0889	0.0367165	NA
chr16	48603280	48603430	150	*	Promoter (<=1kb)	16	48561958	48603712	41755	2	9683	ENST00000564710.1	282	ENSG00000102921	N4BP1	NEDD4 binding protein 1	25.3433	-0.843025	0.457867	-1.8412	0.065592	NA
chr16	56742488	56742916	428	*	Promoter (1-2kb)	16	56740714	56805552	64839	1	9688	ENST00000562496.5	1775	ENSG00000102900	NUP93	nucleoporin 93	105.126	-0.842914	0.240285	-3.50798	0.000451527	0.0138953
chr19	19119936	19120118	182	*	Promoter (<=1kb)	19	19119738	19120975	1238	2	54929	ENST00000591443.1	857	ENSG00000064545	TMEM161A	transmembrane protein 161A	32.7947	-0.842851	0.415115	-2.0304	0.0423155	NA
chr7	6392973	6394024	1051	*	Promoter (1-2kb)	7	6391458	6402502	11045	1	5879	ENST00000497741.5	1516	ENSG00000136238	RAC1	Rac family small GTPase 1	441.875	-0.842622	0.135373	-6.22443	4.83303e-10	1.76913e-07
chr10	133465243	133465514	271	*	Promoter (1-2kb)	10	133464232	133468991	4760	1	619207	ENST00000462252.1	1012	ENSG00000214279	SCART1	scavenger receptor family member expressed on T cells 1	47.3162	-0.842617	0.35379	-2.38169	0.0172335	0.128259
chr16	4787842	4788113	271	*	Promoter (<=1kb)	16	4786078	4788254	2177	2	124404	ENST00000591624.1	141	ENSG00000140623	SEPTIN12	septin 12	50.0524	-0.842605	0.341359	-2.46838	0.0135725	0.111506
chr19	35059872	35059968	96	*	Promoter (<=1kb)	19	35059143	35059980	838	1	3249	ENST00000600675.1	730	ENSG00000105707	HPN	hepsin	23.1485	-0.842047	0.487784	-1.72627	0.0842989	NA
chr9	96027815	96028016	201	*	Promoter (<=1kb)	9	96020771	96027960	7190	2	100188953	ENST00000583864.2	0	ENSG00000225194	LINC00092	long intergenic non-protein coding RNA 92	78.4069	-0.841812	0.349136	-2.41113	0.0159031	0.122389
chr17	3690591	3690724	133	*	Promoter (<=1kb)	17	3685520	3690649	5130	2	5026	ENST00000550772.1	0	ENSG00000083454	P2RX5	purinergic receptor P2X 5	28.354	-0.841743	0.441323	-1.90732	0.0564795	NA
chr14	91317262	91318042	780	*	Promoter (1-2kb)	14	91313943	91315870	1928	2	440193	ENST00000557507.1	-1393	ENSG00000015133	CCDC88C	coiled-coil domain containing 88C	323.429	-0.841577	0.157974	-5.32732	9.96719e-08	1.79979e-05
chr5	61304616	61304931	315	*	Promoter (<=1kb)	5	61201304	61304801	103498	2	105378992	ENST00000511794.6	0	ENSG00000249279	LINC02057	long intergenic non-protein coding RNA 2057	127.673	-0.841386	0.281074	-2.99346	0.0027583	0.0437793
chr6	3088542	3089018	476	*	Promoter (<=1kb)	6	3087604	3115150	27547	1	8737	ENST00000679335.1	939	ENSG00000137275	RIPK1	receptor interacting serine/threonine kinase 1	58.6435	-0.841006	0.340063	-2.47309	0.0133951	0.110619
chr10	132364723	132364856	133	*	Promoter (<=1kb)	10	132365471	132367001	1531	1	80313	ENST00000476889.1	-615	ENSG00000148814	LRRC27	leucine rich repeat containing 27	33.1424	-0.840973	0.426657	-1.97108	0.048715	NA
chr19	41383754	41383912	158	*	Promoter (<=1kb)	19	41382801	41384080	1280	1	641649	ENST00000535712.1	954	ENSG00000142046	TMEM91	transmembrane protein 91	27.0467	-0.840768	0.464942	-1.80833	0.0705555	NA
chr7	99975701	99975962	261	*	Promoter (<=1kb)	7	99966738	99976017	9280	2	563	ENST00000411734.1	55	ENSG00000160862	AZGP1	alpha-2-glycoprotein 1, zinc-binding	38.4417	-0.840728	0.402583	-2.08834	0.0367675	NA
chr13	112785438	112785618	180	*	Promoter (<=1kb)	13	112785172	112860798	75627	1	23250	ENST00000418678.5	267	ENSG00000068650	ATP11A	ATPase phospholipid transporting 11A	32.2123	-0.840681	0.417152	-2.01529	0.0438745	NA
chr10	48968698	48968948	250	*	Promoter (<=1kb)	10	48968984	48976959	7976	1	57705	ENST00000497480.1	-36	ENSG00000128815	WDFY4	WDFY family member 4	47.4738	-0.840296	0.345379	-2.43296	0.0149758	0.117932
chr8	56113661	56113956	295	*	Promoter (<=1kb)	8	56112942	56113982	1041	2	4342	ENST00000311923.1	26	ENSG00000172680	MOS	MOS proto-oncogene, serine/threonine kinase	41.8507	-0.840005	0.366621	-2.29121	0.0219512	NA
chr16	70119450	70119610	160	*	Promoter (<=1kb)	16	70120131	70158331	38201	1	55066	ENST00000565186.5	-521	ENSG00000090857	PDPR	pyruvate dehydrogenase phosphatase regulatory subunit	44.257	-0.839847	0.371086	-2.26321	0.0236226	0.15248
chr19	14395719	14395726	7	*	Promoter (<=1kb)	19	14396250	14397911	1662	1	976	ENST00000591737.1	-524	ENSG00000123146	ADGRE5	adhesion G protein-coupled receptor E5	5.67824	-0.839803	1.02972	-0.815567	0.414748	NA
chr1	206924003	206924565	562	*	Promoter (<=1kb)	1	206912973	206923247	10275	2	9214	ENST00000529560.1	-757	ENSG00000162894	FCMR	Fc fragment of IgM receptor	126.094	-0.839291	0.236197	-3.55335	0.000380363	0.0122747
chrX	1403352	1403626	274	*	Promoter (<=1kb)	23	1403459	1414028	10570	1	80161	ENST00000419737.7	0	NA	ASMTL-AS1	ASMTL antisense RNA 1	42.2835	-0.838938	0.365596	-2.29471	0.0217495	NA
chr7	140035468	140035618	150	*	Promoter (<=1kb)	7	140027276	140034736	7461	2	64761	ENST00000466597.1	-733	ENSG00000059378	PARP12	poly(ADP-ribose) polymerase family member 12	59.6905	-0.838416	0.318392	-2.63328	0.00845639	0.0846165
chr20	63808094	63808363	269	*	Promoter (<=1kb)	20	63808076	63816521	8446	1	101928604	ENST00000435912.1	19	NA	ZBTB46-AS1	ZBTB46 antisense RNA 1	46.0429	-0.838127	0.353557	-2.37056	0.0177614	0.130281
chr21	44592858	44593061	203	*	Promoter (<=1kb)	21	44591268	44592505	1238	2	386674	ENST00000400368.1	-354	ENSG00000188155	KRTAP10-6	keratin associated protein 10-6	34.2654	-0.838083	0.417448	-2.00763	0.0446823	NA
chr4	83599302	83599479	177	*	Promoter (<=1kb)	4	83598529	83605139	6611	1	84803	ENST00000509044.1	774	ENSG00000138678	GPAT3	glycerol-3-phosphate acyltransferase 3	35.2859	-0.837573	0.391569	-2.13902	0.0324341	NA
chr18	2846665	2846846	181	*	Promoter (<=1kb)	18	2847006	2916003	68998	1	84034	ENST00000254528.4	-160	ENSG00000132205	EMILIN2	elastin microfibril interfacer 2	24.927	-0.837572	0.477521	-1.754	0.0794303	NA
chr17	80286714	80286775	61	*	Promoter (1-2kb)	17	80287959	80336900	48942	1	57674	ENST00000559070.5	-1184	ENSG00000173821	RNF213	ring finger protein 213	15.3197	-0.837528	0.599098	-1.39798	0.162119	NA
chr21	9073078	9073229	151	*	Promoter (<=1kb)	21	9068414	9073609	5196	2	100132288	ENST00000559466.1	380	ENSG00000188681	TEKT4P2	tektin 4 pseudogene 2	23.0461	-0.836257	0.516495	-1.6191	0.105426	NA
chr18	57693722	57694342	620	*	Promoter (1-2kb)	18	57695958	57738603	42646	1	105372141	ENST00000649476.1	-1616	NA	LOC105372141	uncharacterized LOC105372141	288.79	-0.8361	0.160166	-5.2202	1.78727e-07	2.97064e-05
chr19	34391875	34392201	326	*	Promoter (<=1kb)	19	34392196	34396656	4461	1	2821	ENST00000589985.5	0	ENSG00000105220	GPI	glucose-6-phosphate isomerase	100.301	-0.83533	0.271273	-3.0793	0.00207488	0.0367304
chr4	138938155	138938306	151	*	Promoter (<=1kb)	4	138819960	138937981	118022	2	105377448	ENST00000507038.1	-175	ENSG00000250195	LOC105377448	uncharacterized LOC105377448	16.0386	-0.835122	0.57583	-1.45029	0.146977	NA
chr7	151410229	151410236	7	*	Promoter (<=1kb)	7	151381124	151410038	28915	2	349136	ENST00000334493.11	-192	ENSG00000187260	WDR86	WD repeat domain 86	10.5864	-0.835031	0.722694	-1.15544	0.24791	NA
chr11	64660188	64660192	4	*	Promoter (1-2kb)	11	64660470	64661378	909	2	9379	ENST00000496291.1	1186	ENSG00000110076	NRXN2	neurexin 2	12.7639	-0.834856	0.659793	-1.26533	0.205753	NA
chr22	30731777	30731970	193	*	Promoter (<=1kb)	22	30731557	30731641	85	1	100422912	ENST00000580767.3	221	ENSG00000264661	MIR3200	microRNA 3200	48.7896	-0.83474	0.333329	-2.50425	0.0122711	0.105183
chr6	7230576	7230634	58	*	Promoter (<=1kb)	6	7230642	7250012	19371	1	6239	ENST00000611109.1	-8	ENSG00000124782	RREB1	ras responsive element binding protein 1	15.7197	-0.834684	0.590283	-1.41404	0.15735	NA
chr16	73093542	73093728	186	*	Promoter (<=1kb)	16	73081244	73094546	13303	2	463	ENST00000641077.1	818	ENSG00000140836	ZFHX3	zinc finger homeobox 3	37.6037	-0.834678	0.378609	-2.20459	0.0274829	NA
chr18	32769891	32769992	101	*	Promoter (<=1kb)	18	32769795	32774413	4619	1	105372055	ENST00000426194.1	97	NA	LOC105372055	uncharacterized LOC105372055	17.1237	-0.834255	0.557872	-1.49542	0.134804	NA
chr20	36815362	36815456	94	*	Promoter (<=1kb)	20	36783782	36816281	32500	2	140710	ENST00000465671.1	825	ENSG00000149639	SOGA1	suppressor of glucose, autophagy associated 1	21.3028	-0.833743	0.513579	-1.6234	0.104504	NA
chr16	75306302	75306600	298	*	Promoter (<=1kb)	16	75293698	75306545	12848	2	10428	ENST00000570103.5	0	ENSG00000153774	CFDP1	craniofacial development protein 1	111.513	-0.833519	0.238762	-3.491	0.000481223	0.0145449
chr11	93821587	93821713	126	*	Promoter (<=1kb)	11	93820564	93822073	1510	2	387804	ENST00000414919.2	360	ENSG00000214376	VSTM5	V-set and transmembrane domain containing 5	27.6788	-0.833516	0.446464	-1.86693	0.061912	NA
chr3	8964954	8965224	270	*	Promoter (1-2kb)	3	8941796	8963773	21978	2	56852	ENST00000413832.1	-1182	ENSG00000070950	RAD18	RAD18 E3 ubiquitin protein ligase	117.556	-0.833362	0.249701	-3.33744	0.00084554	0.0210754
chr19	16727022	16727222	200	*	Promoter (<=1kb)	19	16727254	16817963	90710	1	284434	ENST00000673671.1	-32	ENSG00000188039	NWD1	NACHT and WD repeat domain containing 1	35.0466	-0.833359	0.411805	-2.02367	0.0430037	NA
chr1	225735560	225736119	559	*	Promoter (<=1kb)	1	225735855	225745604	9750	1	107985352	ENST00000665855.1	0	NA	LOC107985352	uncharacterized LOC107985352	240.67	-0.832974	0.20508	-4.06171	4.87153e-05	0.0027709
chr12	117969271	117969385	114	*	Promoter (<=1kb)	12	117453012	117968990	515979	2	283455	ENST00000339824.7	-282	ENSG00000171435	KSR2	kinase suppressor of ras 2	17.8806	-0.832075	0.546406	-1.52282	0.127805	NA
chr7	143296459	143296630	171	*	Promoter (1-2kb)	7	143294604	143306569	11966	1	835	ENST00000472067.1	1856	ENSG00000106144	CASP2	caspase 2	33.7049	-0.831973	0.403153	-2.06366	0.0390496	NA
chr19	11580936	11581522	586	*	Promoter (1-2kb)	19	11577160	11579008	1849	2	54	ENST00000591319.1	-1929	ENSG00000102575	ACP5	acid phosphatase 5, tartrate resistant	340.07	-0.831552	0.203951	-4.07722	4.55776e-05	0.00264294
chr2	5692057	5692156	99	*	Promoter (<=1kb)	2	5692384	5701385	9002	1	6664	ENST00000322002.5	-228	ENSG00000176887	SOX11	SRY-box transcription factor 11	19.875	-0.83143	0.52084	-1.59632	0.110416	NA
chr3	194497839	194498077	238	*	Promoter (<=1kb)	3	194402672	194498364	95693	2	79572	ENST00000439040.5	287	ENSG00000133657	ATP13A3	ATPase 13A3	46.4343	-0.831245	0.35087	-2.3691	0.0178315	0.130551
chr7	38631790	38631945	155	*	Promoter (<=1kb)	7	38383704	38631420	247717	2	273	ENST00000325590.9	-371	ENSG00000078053	AMPH	amphiphysin	24.9356	-0.831096	0.462668	-1.79631	0.0724449	NA
chr19	13633104	13633510	406	*	Promoter (<=1kb)	19	13371761	13633025	261265	2	773	ENST00000574974.3	-80	ENSG00000141837	CACNA1A	calcium voltage-gated channel subunit alpha1 A	72.389	-0.831086	0.282107	-2.946	0.00321914	0.047883
chr19	56301206	56301465	259	*	Promoter (<=1kb)	19	56301936	56310446	8511	1	100506374	ENST00000593151.2	-471	ENSG00000267710	EDDM13	epididymal protein 13	66.8698	-0.830972	0.295373	-2.8133	0.00490365	0.0616049
chr12	132327451	132327768	317	*	Promoter (1-2kb)	12	132247440	132329349	81910	2	50614	ENST00000424720.6	1581	ENSG00000182870	GALNT9	polypeptide N-acetylgalactosaminyltransferase 9	132.194	-0.830718	0.247422	-3.3575	0.000786517	0.0201514
chr16	2031030	2031591	561	*	Promoter (1-2kb)	16	2032812	2036823	4012	1	9351	ENST00000565086.1	-1221	ENSG00000065054	SLC9A3R2	SLC9A3 regulator 2	415.395	-0.830358	0.138764	-5.98396	2.17779e-09	6.72725e-07
chr4	1833523	1833615	92	*	Promoter (<=1kb)	4	1822774	1832879	10106	2	3954	ENST00000511977.1	-645	ENSG00000168924	LETM1	leucine zipper and EF-hand containing transmembrane protein 1	22.9652	-0.830232	0.488476	-1.69964	0.0891992	NA
chr22	46620247	46620479	232	*	Promoter (<=1kb)	22	46620386	46679785	59400	1	23151	ENST00000406902.6	0	ENSG00000075240	GRAMD4	GRAM domain containing 4	44.9029	-0.829947	0.362392	-2.29019	0.0220103	0.146601
chr22	36912304	36912642	338	*	Promoter (<=1kb)	22	36913628	36940439	26812	1	1439	ENST00000403662.8	-986	ENSG00000100368	CSF2RB	colony stimulating factor 2 receptor subunit beta	80.5482	-0.82977	0.272455	-3.04553	0.00232271	0.0392349
chr12	104588385	104588870	485	*	Promoter (<=1kb)	12	104588848	104757339	168492	1	50515	ENST00000549016.1	0	ENSG00000171310	CHST11	carbohydrate sulfotransferase 11	102.247	-0.829643	0.26514	-3.12907	0.00175358	0.0332028
chr20	4181898	4181913	15	*	Promoter (<=1kb)	20	4181894	4187747	5854	1	54498	ENST00000494098.5	5	ENSG00000088826	SMOX	spermine oxidase	8.91749	-0.82937	0.767538	-1.08056	0.279894	NA
chr11	122367912	122368176	264	*	Promoter (<=1kb)	11	122089121	122367977	278857	2	399959	ENST00000649216.1	0	ENSG00000255248	MIR100HG	mir-100-let-7a-2-mir-125b-1 cluster host gene	67.3934	-0.829258	0.29929	-2.77075	0.00559279	0.0664386
chr7	128715705	128715729	24	*	Promoter (<=1kb)	7	128715405	128719082	3678	1	84691	ENST00000483459.1	301	ENSG00000135248	FAM71F1	family with sequence similarity 71 member F1	10.7094	-0.828475	0.694577	-1.19278	0.232957	NA
chr2	196586653	196586953	300	*	Promoter (<=1kb)	2	196199337	196586729	387393	2	57520	ENST00000644256.1	0	ENSG00000138411	HECW2	HECT, C2 and WW domain containing E3 ubiquitin protein ligase 2	52.0892	-0.828323	0.363846	-2.27658	0.0228115	0.149595
chr19	6677945	6678265	320	*	Promoter (<=1kb)	19	6677835	6678330	496	2	718	ENST00000601475.1	65	ENSG00000125730	C3	complement C3	79.5341	-0.82828	0.351464	-2.35666	0.0184402	0.132917
chr11	57680385	57680837	452	*	Promoter (<=1kb)	11	57681479	57701182	19704	1	25921	ENST00000529480.1	-642	ENSG00000156599	ZDHHC5	zinc finger DHHC-type palmitoyltransferase 5	95.5723	-0.827642	0.267511	-3.09386	0.00197569	0.0356491
chr19	32719723	32719928	205	*	Promoter (<=1kb)	19	32719753	32821263	101511	1	91646	ENST00000444215.6	0	ENSG00000173809	TDRD12	tudor domain containing 12	42.2891	-0.827433	0.377023	-2.19465	0.0281889	NA
chr8	37939882	37939893	11	*	Promoter (<=1kb)	8	37937638	37940103	2466	2	137362	ENST00000524298.1	210	ENSG00000169154	GOT1L1	glutamic-oxaloacetic transaminase 1 like 1	7.52463	-0.826881	0.855493	-0.966555	0.333767	NA
chr1	168089624	168089786	162	*	Promoter (<=1kb)	1	168085266	168089565	4300	2	23432	ENST00000478868.1	-60	ENSG00000143147	GPR161	G protein-coupled receptor 161	41.5636	-0.826263	0.378652	-2.18212	0.0291009	NA
chr7	2110254	2110660	406	*	Promoter (<=1kb)	7	1980486	2109601	129116	2	8379	ENST00000444373.6	-654	ENSG00000002822	MAD1L1	mitotic arrest deficient 1 like 1	187.799	-0.82542	0.184297	-4.47874	7.50866e-06	0.000644741
chr16	4494971	4495415	444	*	Promoter (<=1kb)	16	4474684	4495763	21080	2	57407	ENST00000572559.1	348	ENSG00000153406	NMRAL1	NmrA like redox sensor 1	89.781	-0.825064	0.262999	-3.13714	0.00170605	0.0326426
chr21	9807760	9808341	581	*	Promoter (1-2kb)	21	9806875	9809723	2849	2	441058	ENST00000623933.1	1382	ENSG00000280081	LINC01667	long intergenic non-protein coding RNA 1667	89.4449	-0.824647	0.325759	-2.53147	0.0113587	0.100484
chr5	174503480	174504102	622	*	Promoter (<=1kb)	5	174503683	174526380	22698	1	101928176	ENST00000504512.5	0	ENSG00000249306	LINC01411	long intergenic non-protein coding RNA 1411	258.197	-0.824585	0.442231	-1.8646	0.0622376	0.26839
chr1	109613310	109613836	526	*	Promoter (<=1kb)	1	109603254	109613084	9831	2	2780	ENST00000351050.8	-227	ENSG00000134183	GNAT2	G protein subunit alpha transducin 2	333.111	-0.824568	0.16269	-5.06835	4.01286e-07	5.84937e-05
chr3	3136053	3136129	76	*	Promoter (1-2kb)	3	3137356	3149023	11668	1	51095	ENST00000650814.1	-1227	ENSG00000072756	TRNT1	tRNA nucleotidyl transferase 1	18.6338	-0.824275	0.535164	-1.54023	0.123505	NA
chr7	32298383	32298528	145	*	Promoter (<=1kb)	7	31751179	32299329	548151	2	5137	ENST00000396193.5	801	ENSG00000154678	PDE1C	phosphodiesterase 1C	23.2301	-0.824244	0.500095	-1.64817	0.099317	NA
chr19	48607335	48607385	50	*	Promoter (<=1kb)	19	48606742	48607714	973	1	171169	ENST00000321762.3	594	ENSG00000177202	SPACA4	sperm acrosome associated 4	17.9928	-0.824228	0.548975	-1.50139	0.133254	NA
chr7	56956898	56957398	500	*	Promoter (1-2kb)	7	56955785	56955864	80	2	100422917	ENST00000582960.1	-1035	ENSG00000264426	MIR4283-1	microRNA 4283-1	81.2575	-0.824041	0.283689	-2.90473	0.00367568	0.0518611
chr19	16063967	16064249	282	*	Promoter (1-2kb)	19	16065737	16066312	576	1	105372292	ENST00000585520.1	-1488	ENSG00000267517	LINC01855	long intergenic non-protein coding RNA 1855	104.017	-0.823982	0.238012	-3.46194	0.000536299	0.0156696
chr12	111792168	111792583	415	*	Promoter (<=1kb)	12	111792611	111809670	17060	1	217	ENST00000549106.1	-28	ENSG00000111275	ALDH2	aldehyde dehydrogenase 2 family member	68.8164	-0.823846	0.296334	-2.78013	0.00543378	0.0653603
chr19	56595912	56596106	194	*	Promoter (<=1kb)	19	56595335	56610543	15209	1	114818278	ENST00000594944.1	578	NA	ZNF71-SMIM17	ZNF71-SMIM17 readthrough (NMD candidate)	35.2842	-0.823232	0.41265	-1.99499	0.046044	NA
chr11	75195685	75195690	5	*	Promoter (<=1kb)	11	75196254	75203408	7155	1	11309	ENST00000530012.1	-564	ENSG00000137491	SLCO2B1	solute carrier organic anion transporter family member 2B1	7.1212	-0.823208	0.848377	-0.970332	0.331881	NA
chr12	116759914	116760036	122	*	Promoter (<=1kb)	12	116759935	116810520	50586	1	84900	ENST00000677328.1	0	ENSG00000135119	RNFT2	ring finger protein, transmembrane 2	41.5938	-0.823188	0.873326	-0.942591	0.34589	NA
chr5	169637014	169637845	831	*	Promoter (<=1kb)	5	169637268	169654806	17539	1	1794	ENST00000648741.1	0	ENSG00000134516	DOCK2	dedicator of cytokinesis 2	107.799	-0.822876	0.238427	-3.45128	0.000557942	0.0161055
chr1	20672214	20672320	106	*	Promoter (<=1kb)	1	20672016	20673020	1005	2	57576	ENST00000463389.1	700	ENSG00000117245	KIF17	kinesin family member 17	19.7658	-0.822446	0.52618	-1.56305	0.118041	NA
chr16	57976211	57976591	380	*	Promoter (<=1kb)	16	57976435	57987571	11137	1	374739	ENST00000290871.10	0	ENSG00000159648	TEPP	testis, prostate and placenta expressed	72.1699	-0.822314	0.28144	-2.92181	0.00348008	0.0501617
chr15	99154359	99154586	227	*	Promoter (1-2kb)	15	99148512	99156279	7768	2	64927	ENST00000558438.1	1693	ENSG00000103852	TTC23	tetratricopeptide repeat domain 23	65.4334	-0.821627	0.302316	-2.71777	0.00657233	0.0729251
chr6	163311716	163312209	493	*	Promoter (<=1kb)	6	163312778	163314987	2210	1	135138	ENST00000611387.1	-569	ENSG00000112530	PACRG	parkin coregulated	163.236	-0.821473	0.242575	-3.38647	0.000707968	0.0187448
chr5	41509386	41509813	427	*	Promoter (<=1kb)	5	41306952	41510601	203650	2	345557	ENST00000377801.8	788	ENSG00000182836	PLCXD3	phosphatidylinositol specific phospholipase C X domain containing 3	55.2999	-0.821228	0.322051	-2.54999	0.0107725	0.0975835
chr15	28789538	28789747	209	*	Promoter (<=1kb)	15	28789664	28790304	641	1	646278	ENST00000565892.1	0	NA	PDCD6IPP2	PDCD6IP pseudogene 2	28.606	-0.820495	0.48122	-1.70503	0.0881882	NA
chr2	168796359	168796384	25	*	Promoter (1-2kb)	2	168798151	168865339	67189	1	115677	ENST00000444448.6	-1767	ENSG00000163072	NOSTRIN	nitric oxide synthase trafficking	6.28141	-0.820337	0.906101	-0.905348	0.365281	NA
chr1	1272756	1272817	61	*	Promoter (<=1kb)	1	1267862	1273471	5610	2	118424	ENST00000488418.2	654	ENSG00000160087	UBE2J2	ubiquitin conjugating enzyme E2 J2	26.2708	-0.820332	0.46571	-1.76147	0.0781593	NA
chr21	44591235	44591453	218	*	Promoter (1-2kb)	21	44591268	44592505	1238	2	386674	ENST00000400368.1	1052	ENSG00000188155	KRTAP10-6	keratin associated protein 10-6	38.675	-0.820182	0.378272	-2.16823	0.030141	NA
chr17	42010406	42010715	309	*	Promoter (<=1kb)	17	41988874	42011275	22402	2	7266	ENST00000590886.7	560	ENSG00000168259	DNAJC7	DnaJ heat shock protein family (Hsp40) member C7	69.7885	-0.820054	0.299356	-2.73939	0.00615524	0.0704099
chr15	90224301	90224823	522	*	Promoter (<=1kb)	15	90225002	90225608	607	1	10509	ENST00000561252.1	-179	ENSG00000185033	SEMA4B	semaphorin 4B	136.719	-0.819893	0.222629	-3.68277	0.00023071	0.00872319
chr1	33334127	33334576	449	*	Promoter (<=1kb)	1	33331364	33335256	3893	2	1912	ENST00000473158.1	680	ENSG00000134686	PHC2	polyhomeotic homolog 2	170.274	-0.819808	0.218445	-3.75292	0.000174784	0.00721397
chr9	62874868	62875445	577	*	Promoter (1-2kb)	9	62867708	62876614	8907	2	403323	ENST00000438699.6	1169	NA	LERFS	lncRNA negative regulator of fibroblast-like synoviocyte migration, SYNCRIP interacting	87.6436	-0.819666	0.268587	-3.05176	0.00227501	0.0387326
chr17	8964982	8965326	344	*	Promoter (<=1kb)	17	8888741	8965615	76875	2	23533	ENST00000580959.5	289	ENSG00000141506	PIK3R5	phosphoinositide-3-kinase regulatory subunit 5	55.1286	-0.819631	0.33438	-2.4512	0.0142382	0.114586
chr6	36858508	36858532	24	*	Promoter (<=1kb)	6	36854827	36858635	3809	2	51645	ENST00000483552.1	103	ENSG00000137168	PPIL1	peptidylprolyl isomerase like 1	14.3258	-0.819519	0.612082	-1.3389	0.180602	NA
chr20	54070368	54070649	281	*	Promoter (<=1kb)	20	53943541	54070545	127005	2	8537	ENST00000371435.6	0	ENSG00000064787	BCAS1	brain enriched myelin associated protein 1	44.4643	-0.818911	0.353024	-2.31971	0.0203568	0.140722
chr2	177322524	177322590	66	*	Promoter (<=1kb)	2	177283514	177323164	39651	2	100130691	ENST00000430416.5	574	ENSG00000213963	LOC100130691	uncharacterized LOC100130691	11.4504	-0.818192	0.721816	-1.13352	0.256996	NA
chr15	90598166	90598427	261	*	Promoter (<=1kb)	15	90598346	90625786	27441	1	64784	ENST00000561255.5	0	ENSG00000140577	CRTC3	CREB regulated transcription coactivator 3	58.61	-0.817715	0.308945	-2.6468	0.0081258	0.0826557
chr5	136979254	136979441	187	*	Promoter (<=1kb)	5	136978454	136979500	1047	2	6695	ENST00000515091.1	59	ENSG00000152377	SPOCK1	SPARC (osteonectin), cwcv and kazal like domains proteoglycan 1	29.9562	-0.817624	0.42512	-1.92328	0.0544451	NA
chr15	67642511	67642692	181	*	Promoter (1-2kb)	15	67640553	67807113	166561	1	5607	ENST00000340972.8	1959	ENSG00000137764	MAP2K5	mitogen-activated protein kinase kinase 5	32.9311	-0.817522	0.413256	-1.97825	0.0479006	NA
chr19	38346346	38346542	196	*	Promoter (<=1kb)	19	38346484	38349629	3146	1	57828	ENST00000467739.1	0	ENSG00000099338	CATSPERG	cation channel sperm associated auxiliary subunit gamma	32.7366	-0.817289	0.405932	-2.01336	0.0440763	NA
chr9	41109398	41109548	150	*	Promoter (<=1kb)	9	41100794	41109434	8641	2	440896	ENST00000619971.2	0	ENSG00000276462	LOC440896	uncharacterized LOC440896	31.74	-0.817036	0.415981	-1.96412	0.049516	NA
chr16	616742	617241	499	*	Promoter (<=1kb)	16	616645	626117	9473	1	57799	ENST00000564703.1	98	ENSG00000197562	RAB40C	RAB40C, member RAS oncogene family	78.3245	-0.816952	0.294119	-2.77762	0.00547582	0.0655896
chr6	41200477	41200531	54	*	Promoter (<=1kb)	6	41189749	41201149	11401	2	79865	ENST00000483722.2	618	ENSG00000112195	TREML2	triggering receptor expressed on myeloid cells like 2	18.6036	-0.81628	0.537723	-1.51803	0.129007	NA
chr3	172307262	172307443	181	*	Promoter (<=1kb)	3	172306936	172310927	3992	1	64778	ENST00000483344.1	327	ENSG00000075420	FNDC3B	fibronectin type III domain containing 3B	42.1289	-0.815199	0.365412	-2.2309	0.0256877	NA
chr12	108339548	108339732	184	*	Promoter (<=1kb)	12	108288044	108339317	51274	2	1240	ENST00000312143.11	-232	ENSG00000174600	CMKLR1	chemerin chemokine-like receptor 1	51.0972	-0.814942	0.352333	-2.31299	0.0207233	0.141878
chr17	35441832	35442134	302	*	Promoter (1-2kb)	17	35441890	35443954	2065	2	146857	ENST00000532774.1	1820	ENSG00000154760	SLFN13	schlafen family member 13	44.2869	-0.814635	0.352166	-2.31321	0.0207109	0.141843
chr1	110606188	110606292	104	*	Promoter (<=1kb)	1	110519837	110606354	86518	2	3737	ENST00000640680.1	62	ENSG00000177301	KCNA2	potassium voltage-gated channel subfamily A member 2	23.2797	-0.814259	0.513704	-1.58507	0.11295	NA
chr10	13113553	13113810	257	*	Promoter (1-2kb)	10	13112487	13116540	4054	1	10133	ENST00000486862.1	1067	ENSG00000123240	OPTN	optineurin	46.2913	-0.813991	0.354348	-2.29715	0.0216103	0.145189
chr8	74320793	74320959	166	*	Promoter (<=1kb)	8	74320832	74366851	46020	1	54332	ENST00000676377.1	0	ENSG00000104381	GDAP1	ganglioside induced differentiation associated protein 1	18.2719	-0.813922	0.556542	-1.46246	0.143614	NA
chr2	37342766	37343095	329	*	Promoter (<=1kb)	2	37342827	37367290	24464	1	25797	ENST00000650442.1	0	ENSG00000115828	QPCT	glutaminyl-peptide cyclotransferase	91.7994	-0.813599	0.252817	-3.21813	0.00129028	0.02744
chr10	132364298	132364546	248	*	Promoter (<=1kb)	10	132365471	132367001	1531	1	80313	ENST00000476889.1	-925	ENSG00000148814	LRRC27	leucine rich repeat containing 27	102.152	-0.813398	0.261459	-3.111	0.00186456	0.03448
chr19	10016911	10017102	191	*	Promoter (<=1kb)	19	10017166	10021088	3923	1	50700	ENST00000589570.1	-64	ENSG00000080511	RDH8	retinol dehydrogenase 8	30.1505	-0.812496	0.445294	-1.82463	0.0680571	NA
chr2	237546702	237546809	107	*	Promoter (<=1kb)	2	237546405	237553843	7439	1	79083	ENST00000477457.1	298	ENSG00000115648	MLPH	melanophilin	16.9729	-0.812446	0.56751	-1.4316	0.152259	NA
chr17	17172527	17172956	429	*	Promoter (<=1kb)	17	17172721	17177396	4676	1	23164	ENST00000581855.1	0	ENSG00000133030	MPRIP	myosin phosphatase Rho interacting protein	136.118	-0.811737	0.219167	-3.70374	0.000212445	0.00826808
chr9	33404045	33405147	1102	*	Promoter (1-2kb)	9	33402857	33409948	7092	1	105376020	ENST00000450864.1	1189	NA	LOC105376020	uncharacterized LOC105376020	153.378	-0.811478	0.201363	-4.02993	5.57928e-05	0.00305495
chr9	87862635	87862889	254	*	Promoter (1-2kb)	9	87864096	87866291	2196	1	107987091	ENST00000646412.1	-1207	NA	LOC107987091	uncharacterized LOC107987091	41.7482	-0.811131	0.385565	-2.10375	0.0354004	NA
chr12	131941694	131942025	331	*	Promoter (<=1kb)	12	131940927	131943859	2933	1	80324	ENST00000543754.1	768	ENSG00000177192	PUS1	pseudouridine synthase 1	51.2399	-0.810621	0.380652	-2.12956	0.0332077	0.185871
chr1	201206548	201206751	203	*	Promoter (1-2kb)	1	201205082	201206475	1394	1	91156	ENST00000444705.2	1467	ENSG00000163395	IGFN1	immunoglobulin like and fibronectin type III domain containing 1	36.6326	-0.81041	0.391974	-2.06751	0.0386864	NA
chr11	63868580	63868796	216	*	Promoter (<=1kb)	11	63868470	63895275	26806	1	2011	ENST00000543674.1	111	ENSG00000072518	MARK2	microtubule affinity regulating kinase 2	59.5552	-0.809809	0.308061	-2.62873	0.00857038	0.0851671
chr19	41628118	41628162	44	*	Promoter (1-2kb)	19	41625567	41627074	1508	2	1089	ENST00000472081.1	-1045	ENSG00000105352	CEACAM4	CEA cell adhesion molecule 4	16.6327	-0.809475	0.571844	-1.41555	0.156906	NA
chr17	77465412	77466313	901	*	Promoter (<=1kb)	17	77466403	77490859	24457	1	10801	ENST00000593189.6	-90	ENSG00000184640	SEPTIN9	septin 9	359.781	-0.809147	0.150032	-5.39317	6.9225e-08	1.34654e-05
chr14	102922773	102922849	76	*	Promoter (<=1kb)	14	102922922	102930841	7920	1	81693	ENST00000541086.5	-73	ENSG00000166126	AMN	amnion associated transmembrane protein	26.688	-0.808603	0.45711	-1.76895	0.0769026	NA
chr5	140364	140576	212	*	Promoter (<=1kb)	5	140566	157110	16545	1	153478	ENST00000502646.1	0	ENSG00000153404	PLEKHG4B	pleckstrin homology and RhoGEF domain containing G4B	42.9054	-0.807587	0.364014	-2.21856	0.0265166	0.163718
chr1	181043244	181043351	107	*	Promoter (1-2kb)	1	181044861	181052389	7529	1	3140	ENST00000684375.1	-1510	ENSG00000153029	MR1	major histocompatibility complex, class I-related	22.9352	-0.807372	0.503252	-1.60431	0.108646	NA
chr11	6219156	6219863	707	*	Promoter (<=1kb)	11	6217805	6218741	937	2	84067	ENST00000532797.1	-416	ENSG00000051009	FHIP1B	FHF complex subunit HOOK interacting protein 1B	316.051	-0.807079	0.172904	-4.66778	3.04468e-06	0.000312043
chr6	166949833	166949933	100	*	Promoter (<=1kb)	6	166928523	166949060	20538	2	8635	ENST00000682498.1	-774	ENSG00000026297	RNASET2	ribonuclease T2	26.934	-0.806632	0.443367	-1.81933	0.0688608	NA
chr1	201493083	201493264	181	*	Promoter (<=1kb)	1	201483532	201492901	9370	2	1465	ENST00000527662.5	-183	ENSG00000159176	CSRP1	cysteine and glycine rich protein 1	71.8145	-0.806566	0.282745	-2.85262	0.00433599	0.0570971
chr4	8182934	8183614	680	*	Promoter (<=1kb)	4	8182075	8240955	58881	1	54436	ENST00000508641.2	860	ENSG00000125089	SH3TC1	SH3 domain and tetratricopeptide repeats 1	457.639	-0.805798	0.147643	-5.45775	4.82212e-08	9.84785e-06
chr1	14946993	14947262	269	*	Promoter (1-2kb)	1	14945919	15065797	119879	1	23254	ENST00000400797.3	1075	ENSG00000189337	KAZN	kazrin, periplakin interacting protein	72.5534	-0.805641	0.332387	-2.4238	0.0153589	0.119597
chr15	23647413	23647615	202	*	Promoter (<=1kb)	15	23643549	23647867	4319	2	54551	ENST00000650528.1	252	ENSG00000254585	MAGEL2	MAGE family member L2	35.3064	-0.805177	0.397922	-2.02346	0.0430262	NA
chr19	7879927	7880010	83	*	Promoter (<=1kb)	19	7879445	7880120	676	2	388499	ENST00000600506.1	110	NA	LYPLA2P2	LYPLA2 pseudogene 2	19.6636	-0.805135	0.572816	-1.40557	0.159851	NA
chr9	129121298	129121356	58	*	Promoter (1-2kb)	9	129119513	129129065	9553	1	5524	ENST00000440346.1	1786	ENSG00000119383	PTPA	protein phosphatase 2 phosphatase activator	12.0232	-0.804918	0.675054	-1.19238	0.233114	NA
chr2	218126106	218126142	36	*	Promoter (<=1kb)	2	218126028	218137251	11224	1	3579	ENST00000318507.7	79	ENSG00000180871	CXCR2	C-X-C motif chemokine receptor 2	12.1136	-0.804703	0.667613	-1.20534	0.228071	NA
chr21	10521001	10521754	753	*	Promoter (<=1kb)	21	10521553	10606140	84588	1	7179	ENST00000622113.4	0	ENSG00000274391	TPTE	transmembrane phosphatase with tensin homology	133.758	-0.804308	0.266773	-3.01495	0.00257018	0.0418344
chr7	128714810	128715363	553	*	Promoter (<=1kb)	7	128715389	128726868	11480	1	84691	ENST00000471558.5	-26	ENSG00000135248	FAM71F1	family with sequence similarity 71 member F1	94.338	-0.804045	0.256636	-3.13302	0.00173019	0.0329184
chr3	192515149	192515218	69	*	Promoter (<=1kb)	3	192515022	192516573	1552	1	100873987	ENST00000443165.1	128	ENSG00000230126	FGF12-AS2	FGF12 antisense RNA 2	13.1699	-0.803906	0.650623	-1.2356	0.216609	NA
chr17	35193766	35194348	582	*	Promoter (<=1kb)	17	35192520	35194523	2004	2	146861	ENST00000297307.6	175	ENSG00000164729	SLC35G3	solute carrier family 35 member G3	79.1472	-0.803648	0.279782	-2.87241	0.00407358	0.0551098
chr16	81189167	81189200	33	*	Promoter (<=1kb)	16	81130081	81188998	58918	2	114780	ENST00000299598.11	-170	ENSG00000166473	PKD1L2	polycystin 1 like 2 (gene/pseudogene)	11.6697	-0.803442	0.690841	-1.16299	0.244833	NA
chr7	87474548	87474806	258	*	Promoter (<=1kb)	7	87423849	87475408	51560	2	5244	ENST00000643670.1	602	ENSG00000005471	ABCB4	ATP binding cassette subfamily B member 4	65.1994	-0.803428	0.296984	-2.70529	0.00682446	0.0747351
chr1	11766139	11766315	176	*	Promoter (<=1kb)	1	11766742	11778310	11569	1	284498	ENST00000484153.1	-427	ENSG00000215910	C1orf167	chromosome 1 open reading frame 167	45.1255	-0.803374	0.389798	-2.061	0.0393028	0.204522
chr1	109186844	109187048	204	*	Promoter (<=1kb)	1	109186549	109203231	16683	1	57535	ENST00000369938.5	296	ENSG00000116299	ELAPOR1	endosome-lysosome associated apoptosis and autophagy regulator 1	38.0306	-0.803339	0.378089	-2.12473	0.0336088	NA
chr8	143359858	143360047	189	*	Promoter (<=1kb)	8	143309356	143359924	50569	2	116447	ENST00000521193.5	0	ENSG00000184428	TOP1MT	DNA topoisomerase I mitochondrial	42.9411	-0.803148	0.360618	-2.22715	0.0259374	0.161435
chr15	89758915	89759110	195	*	Promoter (1-2kb)	15	89760591	89778754	18164	1	145873	ENST00000560219.2	-1481	ENSG00000188095	MESP2	mesoderm posterior bHLH transcription factor 2	34.4598	-0.803045	0.412687	-1.94589	0.0516675	NA
chr4	21949088	21949271	183	*	Promoter (<=1kb)	4	20728606	21948772	1220167	2	80333	ENST00000382152.7	-317	ENSG00000185774	KCNIP4	potassium voltage-gated channel interacting protein 4	26.9835	-0.80287	0.452593	-1.77394	0.0760737	NA
chr9	135576131	135576173	42	*	Promoter (1-2kb)	9	135574951	135587112	12162	1	100130954	ENST00000445997.1	1181	ENSG00000237339	LINC01502	long intergenic non-protein coding RNA 1502	17.8021	-0.802783	0.571759	-1.40406	0.160302	NA
chr2	127219116	127219571	455	*	Promoter (<=1kb)	2	127183832	127220299	36468	2	339761	ENST00000664447.2	728	ENSG00000186684	CYP27C1	cytochrome P450 family 27 subfamily C member 1	74.1092	-0.802744	0.318579	-2.51977	0.0117432	0.102523
chr9	40928370	40929016	646	*	Promoter (<=1kb)	9	40929010	40929092	83	2	100302167	ENST00000622265.1	76	ENSG00000275377	MIR1299	microRNA 1299	128.792	-0.80195	0.235786	-3.40118	0.000670963	0.0181369
chr19	7596294	7596911	617	*	Promoter (<=1kb)	19	7595902	7618304	22403	1	57662	ENST00000446248.4	393	ENSG00000076826	CAMSAP3	calmodulin regulated spectrin associated protein family member 3	78.722	-0.801891	0.275828	-2.90722	0.00364659	0.0516041
chr7	144238533	144239192	659	*	Promoter (<=1kb)	7	144228244	144239605	11362	2	402317	ENST00000641810.1	413	ENSG00000212807	OR2A42	olfactory receptor family 2 subfamily A member 42	104.006	-0.801608	0.301134	-2.66196	0.00776864	0.0804823
chr6	158894344	158894524	180	*	Promoter (<=1kb)	6	158895217	158910352	15136	1	100130967	ENST00000608817.2	-693	ENSG00000203711	LINC02901	long intergenic non-protein coding RNA 2901	33.7037	-0.80123	0.406974	-1.96875	0.0489819	NA
chr15	68485758	68485974	216	*	Promoter (1-2kb)	15	68483202	68487149	3948	2	105370873	ENST00000660959.1	1175	NA	LOC105370873	uncharacterized LOC105370873	40.0597	-0.800951	0.369519	-2.16755	0.0301931	NA
chr10	102344241	102344432	191	*	Promoter (<=1kb)	10	102344051	102352518	8468	1	8729	ENST00000677838.1	191	ENSG00000107862	GBF1	golgi brefeldin A resistant guanine nucleotide exchange factor 1	44.5789	-0.800514	0.352701	-2.26967	0.0232277	0.151155
chr6	30192093	30192194	101	*	Promoter (1-2kb)	6	30184455	30190394	5940	2	7726	ENST00000480999.1	-1700	ENSG00000234127	TRIM26	tripartite motif containing 26	27.3564	-0.800116	0.445072	-1.79772	0.0722211	NA
chr5	1325167	1325526	359	*	Promoter (<=1kb)	5	1318175	1325827	7653	2	81037	ENST00000503534.5	301	ENSG00000049656	CLPTM1L	CLPTM1 like	62.3123	-0.799693	0.30689	-2.60579	0.0091662	0.08864
chr1	9039112	9039184	72	*	Promoter (<=1kb)	1	9038431	9039895	1465	2	6518	ENST00000487492.1	711	ENSG00000142583	SLC2A5	solute carrier family 2 member 5	25.5983	-0.799538	0.466848	-1.71263	0.0867807	NA
chr20	63664943	63664969	26	*	Promoter (<=1kb)	20	63665066	63674052	8987	1	51750	ENST00000463361.1	-97	ENSG00000258366	RTEL1	regulator of telomere elongation helicase 1	18.1024	-0.799437	0.590612	-1.35357	0.175872	NA
chr1	160219024	160219364	340	*	Promoter (<=1kb)	1	160217347	160219314	1968	2	50717	ENST00000476033.5	0	ENSG00000132716	DCAF8	DDB1 and CUL4 associated factor 8	87.6951	-0.799208	0.260936	-3.06285	0.00219241	0.0378559
chr12	124519464	124519511	47	*	Promoter (1-2kb)	12	124419959	124518294	98336	2	9612	ENST00000420698.5	-1171	ENSG00000196498	NCOR2	nuclear receptor corepressor 2	24.8804	-0.798983	0.48131	-1.66002	0.0969111	NA
chr17	82582162	82582367	205	*	Promoter (<=1kb)	17	82582775	82586043	3269	1	3607	ENST00000571160.1	-408	ENSG00000141568	FOXK2	forkhead box K2	32.7829	-0.798657	0.42461	-1.88092	0.0599829	NA
chr3	192515372	192515600	228	*	Promoter (<=1kb)	3	192515022	192516573	1552	1	100873987	ENST00000443165.1	351	ENSG00000230126	FGF12-AS2	FGF12 antisense RNA 2	31.2435	-0.798593	0.420538	-1.89898	0.057567	NA
chr22	45285373	45285530	157	*	Promoter (<=1kb)	22	45284991	45295822	10832	1	7380	ENST00000396082.2	383	ENSG00000100373	UPK3A	uroplakin 3A	27.1696	-0.798371	0.473374	-1.68655	0.0916893	NA
chr17	42129545	42129613	68	*	Promoter (<=1kb)	17	42126523	42128759	2237	2	5878	ENST00000551338.1	-787	ENSG00000108774	RAB5C	RAB5C, member RAS oncogene family	20.5774	-0.79833	0.525948	-1.51789	0.129043	NA
chr10	131094750	131094977	227	*	Promoter (<=1kb)	10	131095218	131095777	560	1	101927489	ENST00000436942.1	-241	ENSG00000230098	TCERG1L-AS1	TCERG1L antisense RNA 1	42.7145	-0.79832	0.366713	-2.17696	0.0294834	NA
chr9	137055447	137056136	689	*	Promoter (1-2kb)	9	137048107	137054061	5955	2	954	ENST00000355097.7	-1387	ENSG00000054179	ENTPD2	ectonucleoside triphosphate diphosphohydrolase 2	239.159	-0.79825	0.205131	-3.89141	9.96632e-05	0.00476864
chr17	79952254	79952432	178	*	Promoter (<=1kb)	17	79947645	79952013	4369	2	125058	ENST00000574241.6	-242	ENSG00000167291	TBC1D16	TBC1 domain family member 16	36.4013	-0.797736	0.396037	-2.0143	0.0439784	NA
chr13	113103786	113104244	458	*	Promoter (1-2kb)	13	113105788	113120678	14891	1	2155	ENST00000541084.5	-1544	ENSG00000057593	F7	coagulation factor VII	68.9511	-0.797429	0.296041	-2.69364	0.00706766	0.0762759
chr20	23518580	23518645	65	*	Promoter (<=1kb)	20	23519146	23542018	22873	1	164380	ENST00000400563.6	-501	ENSG00000204663	CST13P	cystatin 13, pseudogene	16.9357	-0.797311	0.574389	-1.3881	0.165106	NA
chrX	1294339	1295202	863	*	Promoter (<=1kb)	23	1294328	1309934	15607	1	1438	ENST00000498153.6	12	ENSG00000198223	CSF2RA	colony stimulating factor 2 receptor subunit alpha	132.482	-0.797159	0.22462	-3.54892	0.000386807	0.0124185
chr17	16988322	16988472	150	*	Promoter (<=1kb)	17	16988329	16990177	1849	1	105371562	ENST00000419151.2	0	ENSG00000230969	LINC02090	long intergenic non-protein coding RNA 2090	39.5402	-0.797119	0.375095	-2.12511	0.0335772	NA
chr5	150658925	150659143	218	*	Promoter (1-2kb)	5	150660882	150679365	18484	1	91977	ENST00000297130.4	-1739	ENSG00000164591	MYOZ3	myozenin 3	69.1239	-0.797095	0.285702	-2.78995	0.00527158	0.0641669
chr7	18793327	18793612	285	*	Promoter (<=1kb)	7	18793159	18997299	204141	1	9734	ENST00000490851.5	169	ENSG00000048052	HDAC9	histone deacetylase 9	49.1778	-0.797075	0.343701	-2.31909	0.02039	0.140814
chr1	82907442	82907745	303	*	Promoter (<=1kb)	1	82907562	82997561	90000	1	103283057	ENST00000419658.1	0	ENSG00000230817	LINC01362	long intergenic non-protein coding RNA 1362	93.114	-0.796367	0.311018	-2.56052	0.0104516	0.0957805
chr12	49910635	49910957	322	*	Promoter (<=1kb)	12	49908882	49911278	2397	2	283332	ENST00000546911.5	321	ENSG00000258135	LINC02396	long intergenic non-protein coding RNA 2396	51.2561	-0.796136	0.331936	-2.39846	0.0164641	0.124935
chr17	56910225	56910584	359	*	Promoter (1-2kb)	17	56901427	56908783	7357	2	7706	ENST00000572550.1	-1443	ENSG00000121060	TRIM25	tripartite motif containing 25	97.8166	-0.795893	0.275659	-2.88724	0.00388639	0.0535644
chr19	40341693	40342085	392	*	Promoter (<=1kb)	19	40321416	40341885	20470	2	126526	ENST00000357884.8	0	ENSG00000160392	C19orf47	chromosome 19 open reading frame 47	56.5344	-0.795734	0.318105	-2.50148	0.0123675	0.105641
chr7	2541802	2541897	95	*	Promoter (<=1kb)	7	2538412	2541024	2613	2	221927	ENST00000473879.1	-779	ENSG00000106009	BRAT1	BRCA1 associated ATM activator 1	27.8117	-0.795559	0.454976	-1.74857	0.0803645	NA
chr3	45773978	45774261	283	*	Promoter (1-2kb)	3	45758504	45772339	13836	2	54716	ENST00000473146.5	-1640	ENSG00000163817	SLC6A20	solute carrier family 6 member 20	121.862	-0.795191	0.313452	-2.53688	0.0111844	0.0997198
chr16	15041473	15041944	471	*	Promoter (1-2kb)	16	15038608	15040467	1860	2	123803	ENST00000570292.1	-1007	ENSG00000157045	NTAN1	N-terminal asparagine amidase	108.46	-0.794429	0.24355	-3.26186	0.00110682	0.024931
chr19	13600246	13600396	150	*	Promoter (<=1kb)	19	13208046	13599946	391901	2	773	ENST00000664864.1	-301	ENSG00000141837	CACNA1A	calcium voltage-gated channel subunit alpha1 A	21.339	-0.794273	0.519951	-1.52759	0.126614	NA
chr16	19304894	19305102	208	*	Promoter (<=1kb)	16	19304881	19310947	6067	1	728276	ENST00000468219.1	14	ENSG00000261210	CLEC19A	C-type lectin domain containing 19A	41.4467	-0.794147	0.368996	-2.15218	0.031383	NA
chr2	218124746	218124871	125	*	Promoter (<=1kb)	2	218125289	218135403	10115	1	3579	ENST00000453237.5	-418	ENSG00000180871	CXCR2	C-X-C motif chemokine receptor 2	27.3696	-0.794104	0.455351	-1.74394	0.0811695	NA
chr15	51038335	51038738	403	*	Promoter (<=1kb)	15	51037488	51293912	256425	1	109729174	ENST00000559909.1	848	ENSG00000259240	MIR4713HG	MIR4713 host gene	56.0668	-0.793793	0.323347	-2.45493	0.0140913	0.113889
chr15	85581509	85581702	193	*	Promoter (1-2kb)	15	85582910	85645917	63008	1	11214	ENST00000560340.5	-1208	ENSG00000170776	AKAP13	A-kinase anchoring protein 13	88.5449	-0.793739	0.257252	-3.08545	0.00203246	0.0362079
chr8	12719969	12720234	265	*	Promoter (<=1kb)	8	12719132	12719190	59	1	100847038	ENST00000582551.2	838	ENSG00000264512	MIR5692A2	microRNA 5692a-2	33.669	-0.793431	0.405714	-1.95564	0.0505077	NA
chr17	6996018	6996075	57	*	Promoter (<=1kb)	17	6996049	7010754	14706	1	239	ENST00000251535.11	0	ENSG00000108839	ALOX12	arachidonate 12-lipoxygenase, 12S type	13.0595	-0.793231	0.636371	-1.24649	0.212584	NA
chr15	88639945	88640072	127	*	Promoter (<=1kb)	15	88639043	88655648	16606	1	3669	ENST00000560573.1	903	ENSG00000172183	ISG20	interferon stimulated exonuclease gene 20	73.6817	-0.793101	0.280796	-2.82447	0.00473587	0.0603072
chr7	5143967	5144147	180	*	Promoter (<=1kb)	7	5121572	5144546	22975	2	645700	ENST00000422060.2	399	ENSG00000159904	ZNF890P	zinc finger protein 890, pseudogene	27.1408	-0.793083	0.453218	-1.74989	0.080137	NA
chr1	150962635	150963056	421	*	Promoter (<=1kb)	1	150962974	150963848	875	1	9869	ENST00000533529.1	0	ENSG00000143379	SETDB1	SET domain bifurcated histone lysine methyltransferase 1	70.7794	-0.793056	0.286029	-2.77264	0.00556032	0.0662216
chr3	149473723	149474008	285	*	Promoter (<=1kb)	3	149474697	149503394	28698	1	7104	ENST00000305354.5	-689	ENSG00000169903	TM4SF4	transmembrane 4 L six family member 4	70.4542	-0.792911	0.288731	-2.74619	0.00602917	0.0695713
chr2	39666967	39667064	97	*	Promoter (1-2kb)	2	39665967	39717956	51990	1	130733	ENST00000618232.1	1001	ENSG00000152154	TMEM178A	transmembrane protein 178A	19.3565	-0.792694	0.528227	-1.50067	0.133441	NA
chr1	21568232	21568457	225	*	Promoter (1-2kb)	1	21570303	21577731	7429	1	249	ENST00000374830.2	-1846	ENSG00000162551	ALPL	alkaline phosphatase, biomineralization associated	55.1438	-0.791461	0.32335	-2.44769	0.0143774	0.115281
chr4	1175057	1175225	168	*	Promoter (1-2kb)	4	1171381	1173211	1831	2	10417	ENST00000503765.5	-1847	ENSG00000159674	SPON2	spondin 2	40.4222	-0.791271	0.369297	-2.14264	0.0321419	NA
chr10	132607595	132607814	219	*	Promoter (<=1kb)	10	132607926	132777782	169857	1	3632	ENST00000342652.6	-112	ENSG00000068383	INPP5A	inositol polyphosphate-5-phosphatase A	45.2683	-0.79104	0.349048	-2.26628	0.0234343	0.151874
chr8	143823945	143824123	178	*	Promoter (<=1kb)	8	143817886	143824399	6514	2	22827	ENST00000528320.5	276	ENSG00000179950	PUF60	poly(U) binding splicing factor 60	75.6292	-0.791021	0.274779	-2.87875	0.00399254	0.0543804
chr4	10054056	10054104	48	*	Promoter (<=1kb)	4	9826224	10054875	228652	2	56606	ENST00000506583.5	771	ENSG00000109667	SLC2A9	solute carrier family 2 member 9	21.2125	-0.790842	0.507512	-1.55827	0.119169	NA
chr1	26070322	26070548	226	*	Promoter (1-2kb)	1	26061244	26068436	7193	2	84676	ENST00000483052.1	-1887	ENSG00000158022	TRIM63	tripartite motif containing 63	39.922	-0.790712	0.380869	-2.07607	0.0378873	NA
chr19	45332892	45333120	228	*	Promoter (<=1kb)	19	45333434	45350387	16954	1	147700	ENST00000589373.5	-314	ENSG00000104892	KLC3	kinesin light chain 3	34.5268	-0.790084	0.403204	-1.95952	0.0500524	NA
chr5	168528402	168528665	263	*	Promoter (<=1kb)	5	168529305	168530634	1330	1	345630	ENST00000338333.5	-640	ENSG00000188573	FBLL1	fibrillarin like 1	41.429	-0.789834	0.38062	-2.07512	0.037975	NA
chr16	19488454	19488498	44	*	Promoter (1-2kb)	16	19486941	19498277	11337	1	79838	ENST00000574033.1	1514	ENSG00000103534	TMC5	transmembrane channel like 5	14.3808	-0.789802	0.628713	-1.25622	0.209036	NA
chr4	21949361	21949383	22	*	Promoter (<=1kb)	4	20728606	21948772	1220167	2	80333	ENST00000382152.7	-590	ENSG00000185774	KCNIP4	potassium voltage-gated channel interacting protein 4	9.63634	-0.789779	0.733204	-1.07716	0.281409	NA
chr22	17190004	17190075	71	*	Promoter (1-2kb)	22	17182641	17188727	6087	2	51816	ENST00000469063.1	-1278	ENSG00000093072	ADA2	adenosine deaminase 2	17.9584	-0.789609	0.555479	-1.42149	0.155174	NA
chr19	54574809	54575195	386	*	Promoter (<=1kb)	19	54576072	54587547	11476	1	11027	ENST00000472992.1	-877	ENSG00000239998	LILRA2	leukocyte immunoglobulin like receptor A2	70.57	-0.789547	0.336917	-2.34345	0.0191065	0.13553
chr1	7388568	7390329	1761	*	Promoter (<=1kb)	1	7382487	7389754	7268	2	102725193	ENST00000618051.1	0	ENSG00000237728	CAMTA1-AS2	CAMTA1 antisense RNA 2	677.517	-0.789363	0.122219	-6.4586	1.05678e-10	4.80597e-08
chr5	113205856	113206119	263	*	Promoter (1-2kb)	5	113101734	113204576	102843	2	4163	ENST00000511847.2	-1281	ENSG00000171444	MCC	MCC regulator of WNT signaling pathway	48.8499	-0.788638	0.345223	-2.28443	0.0223463	0.147958
chr19	12750352	12750435	83	*	Promoter (1-2kb)	19	12751702	12758406	6705	1	54831	ENST00000549706.5	-1267	ENSG00000039987	BEST2	bestrophin 2	24.2257	-0.788583	0.483757	-1.63012	0.103076	NA
chr21	44485986	44486110	124	*	Promoter (<=1kb)	21	44485577	44490288	4712	1	111216286	ENST00000449713.1	410	NA	LINC02575	long intergenic non-protein coding RNA 2575	26.6399	-0.788357	0.454756	-1.73359	0.0829917	NA
chr17	10062905	10063096	191	*	Promoter (1-2kb)	17	9946933	10061379	114447	2	8522	ENST00000584389.5	-1527	ENSG00000007237	GAS7	growth arrest specific 7	37.7645	-0.788008	0.399836	-1.97083	0.0487435	NA
chr22	25448426	25448593	167	*	Promoter (<=1kb)	22	25448105	25461678	13574	1	1416	ENST00000382734.9	322	ENSG00000100058	CRYBB2P1	crystallin beta B2 pseudogene 1	29.0697	-0.787973	0.438398	-1.79739	0.0722735	NA
chr11	1100748	1100825	77	*	Promoter (<=1kb)	11	1099770	1110508	10739	1	4583	ENST00000674892.1	979	ENSG00000198788	MUC2	mucin 2, oligomeric mucus/gel-forming	23.0106	-0.787954	0.485489	-1.62301	0.104587	NA
chr17	8880538	8880717	179	*	Promoter (1-2kb)	17	8880464	8881869	1406	2	23533	ENST00000585260.5	1152	ENSG00000141506	PIK3R5	phosphoinositide-3-kinase regulatory subunit 5	45.2381	-0.787899	0.358084	-2.20032	0.0277842	0.168069
chr21	44637322	44637446	124	*	Promoter (<=1kb)	21	44637356	44638455	1100	1	353333	ENST00000380095.2	0	ENSG00000221859	KRTAP10-10	keratin associated protein 10-10	29.1875	-0.787545	0.435398	-1.80879	0.070483	NA
chr3	27217087	27217416	329	*	Promoter (<=1kb)	3	27110903	27216475	105573	2	152110	ENST00000383771.8	-613	ENSG00000163491	NEK10	NIMA related kinase 10	71.8248	-0.78598	0.291954	-2.69214	0.00709962	0.0765199
chr19	39025367	39025550	183	*	Promoter (1-2kb)	19	38990714	39026960	36247	2	126433	ENST00000598394.1	1410	ENSG00000161243	FBXO27	F-box protein 27	27.0088	-0.785818	0.474765	-1.65517	0.0978898	NA
chr17	82372571	82372668	97	*	Promoter (<=1kb)	17	82371765	82377458	5694	1	2837	ENST00000313135.5	807	ENSG00000181408	UTS2R	urotensin 2 receptor	26.3547	-0.785727	0.463115	-1.69661	0.0897699	NA
chr9	128225814	128225978	164	*	Promoter (<=1kb)	9	128226138	128232634	6497	1	1759	ENST00000637317.1	-160	ENSG00000106976	DNM1	dynamin 1	21.4794	-0.78561	0.510207	-1.53979	0.123613	NA
chr5	72289113	72289265	152	*	Promoter (<=1kb)	5	72226093	72288872	62780	2	23107	ENST00000522042.1	-242	ENSG00000113048	MRPS27	mitochondrial ribosomal protein S27	24.6099	-0.785266	0.474764	-1.65401	0.0981248	NA
chr9	137788640	137789297	657	*	Promoter (<=1kb)	9	137776539	137789235	12697	2	651337	ENST00000626603.1	0	ENSG00000255585	LOC651337	uncharacterized LOC651337	132.418	-0.785212	0.21832	-3.59662	0.000322381	0.0109691
chr15	76576649	76576824	175	*	Promoter (<=1kb)	15	76434181	76576951	142771	2	49855	ENST00000568428.5	127	ENSG00000140386	SCAPER	S-phase cyclin A associated protein in the ER	28.3063	-0.784646	0.445874	-1.75979	0.0784426	NA
chr7	34870100	34870369	269	*	Promoter (1-2kb)	7	34643227	34871582	228356	2	404744	ENST00000431669.5	1213	ENSG00000197085	NPSR1-AS1	NPSR1 antisense RNA 1	63.6936	-0.784415	0.296172	-2.64851	0.00808482	0.0823753
chr16	90007131	90007397	266	*	Promoter (1-2kb)	16	90004871	90009004	4134	2	79007	ENST00000568662.2	1607	ENSG00000003249	DBNDD1	dysbindin domain containing 1	54.1128	-0.784341	0.333989	-2.3484	0.0188542	0.134642
chr1	154453317	154453956	639	*	Promoter (<=1kb)	1	154454109	154465248	11140	1	3570	ENST00000502679.1	-153	ENSG00000160712	IL6R	interleukin 6 receptor	88.7235	-0.784318	0.264156	-2.96914	0.00298631	0.0457927
chr19	48085521	48085919	398	*	Promoter (<=1kb)	19	48074438	48085110	10673	2	8605	ENST00000593765.5	-412	ENSG00000105499	PLA2G4C	phospholipase A2 group IVC	64.8523	-0.784284	0.297233	-2.63862	0.00832453	0.0838608
chr17	48030680	48030830	150	*	Promoter (1-2kb)	17	48026167	48029425	3259	2	51226	ENST00000580409.5	-1256	ENSG00000005243	COPZ2	COPI coat complex subunit zeta 2	46.3384	-0.784146	0.343375	-2.28364	0.0223925	0.148161
chr2	1902455	1902697	242	*	Promoter (<=1kb)	2	1886186	1903127	16942	2	23040	ENST00000490585.1	430	ENSG00000186487	MYT1L	myelin transcription factor 1 like	37.3247	-0.784059	0.38378	-2.04299	0.0410536	NA
chr3	46454933	46455249	316	*	Promoter (<=1kb)	3	46454014	46455823	1810	2	4057	ENST00000462667.1	574	ENSG00000012223	LTF	lactotransferrin	55.7194	-0.783884	0.3205	-2.44582	0.0144524	0.115514
chr10	26946285	26946437	152	*	Promoter (1-2kb)	10	26931247	26944418	13172	2	387644	ENST00000640224.1	-1868	ENSG00000283709	FAM238C	family with sequence similarity 238 member C	32.3983	-0.783685	0.423795	-1.84921	0.064428	NA
chr19	45667661	45667997	336	*	Promoter (<=1kb)	19	45668221	45683684	15464	1	2696	ENST00000652180.1	-224	ENSG00000010310	GIPR	gastric inhibitory polypeptide receptor	74.1076	-0.783567	0.285131	-2.74809	0.00599431	0.0693145
chr6	112054275	112054400	125	*	Promoter (<=1kb)	6	112054220	112069658	15439	1	8838	ENST00000409166.5	56	ENSG00000112761	CCN6	cellular communication network factor 6	23.3899	-0.783284	0.482906	-1.62202	0.104799	NA
chr3	123799760	123799962	202	*	Promoter (<=1kb)	3	123737241	123800188	62948	2	4638	ENST00000506361.5	226	ENSG00000065534	MYLK	myosin light chain kinase	47.7186	-0.78292	0.394524	-1.98447	0.0472039	0.227917
chr1	156490372	156491047	675	*	Promoter (<=1kb)	1	156466210	156490599	24390	2	4209	ENST00000360595.7	0	ENSG00000116604	MEF2D	myocyte enhancer factor 2D	183.807	-0.782906	0.186768	-4.19187	2.76668e-05	0.00180461
chr19	40411569	40411954	385	*	Promoter (1-2kb)	19	40408340	40410160	1821	2	57716	ENST00000674899.1	-1410	ENSG00000105227	PRX	periaxin	80.5767	-0.782514	0.271365	-2.88363	0.00393126	0.0538474
chr3	62587238	62588206	968	*	Promoter (1-2kb)	3	62533022	62585246	52225	2	8618	ENST00000542833.1	-1993	ENSG00000163618	CADPS	calcium dependent secretion activator	266.786	-0.782291	0.39657	-1.97264	0.0485362	0.231814
chr9	138201899	138201985	86	*	Promoter (1-2kb)	9	138199933	138203325	3393	2	101928932	ENST00000428088.1	1340	ENSG00000237419	LOC101928932	uncharacterized LOC101928932	24.1835	-0.782002	0.481372	-1.62453	0.104264	NA
chr8	7836200	7836475	275	*	Promoter (<=1kb)	8	7836436	7841242	4807	1	140596	ENST00000314265.3	0	ENSG00000176782	DEFB104A	defensin beta 104A	55.7818	-0.781924	0.334351	-2.33863	0.0193544	0.13659
chr11	1686362	1686582	220	*	Promoter (<=1kb)	11	1683269	1685629	2361	2	100132464	ENST00000382166.2	-734	ENSG00000205865	FAM99B	family with sequence similarity 99 member B	51.4667	-0.781889	0.355126	-2.20172	0.0276848	0.167817
chr6	127518680	127518995	315	*	Promoter (<=1kb)	6	127472806	127518891	46086	2	387104	ENST00000465909.2	0	ENSG00000255330	SOGA3	SOGA family member 3	53.24	-0.781881	0.324192	-2.41178	0.0158747	0.122238
chr3	141066066	141066109	43	*	Promoter (<=1kb)	3	141066638	141148610	81973	1	92369	ENST00000508126.1	-529	ENSG00000175093	SPSB4	splA/ryanodine receptor domain and SOCS box containing 4	15.256	-0.781517	0.623186	-1.25407	0.209818	NA
chr19	54664741	54664829	88	*	Promoter (<=1kb)	19	54665798	54667390	1593	1	11006	ENST00000470943.1	-969	ENSG00000186818	LILRB4	leukocyte immunoglobulin like receptor B4	14.3624	-0.781501	0.639697	-1.22167	0.221831	NA
chr19	35946922	35947072	150	*	Promoter (<=1kb)	19	35947115	35959192	12078	1	105372383	ENST00000592518.1	-43	NA	LOC105372383	uncharacterized LOC105372383	30.1882	-0.781336	0.443732	-1.76083	0.0782671	NA
chr4	48369391	48369523	132	*	Promoter (<=1kb)	4	48369849	48379724	9876	1	57606	ENST00000506375.1	-326	ENSG00000109171	SLAIN2	SLAIN motif family member 2	32.1223	-0.781161	0.422047	-1.85089	0.064186	NA
chr3	69082933	69083101	168	*	Promoter (1-2kb)	3	69084937	69106092	21156	1	10550	ENST00000273258.4	-1836	ENSG00000144746	ARL6IP5	ADP ribosylation factor like GTPase 6 interacting protein 5	93.4888	-0.780992	0.25791	-3.02816	0.00246049	0.0406349
chr17	46928839	46929853	1014	*	Promoter (<=1kb)	17	46929552	46975524	45973	1	9570	ENST00000640723.1	0	ENSG00000108433	GOSR2	golgi SNAP receptor complex member 2	293.934	-0.78004	0.153527	-5.0808	3.75842e-07	5.52685e-05
chr9	128224758	128224821	63	*	Promoter (1-2kb)	9	128226138	128232634	6497	1	1759	ENST00000637317.1	-1317	ENSG00000106976	DNM1	dynamin 1	21.9782	-0.779675	0.510421	-1.52751	0.126633	NA
chr19	38425419	38425765	346	*	Promoter (<=1kb)	19	38409840	38426162	16323	2	115727	ENST00000587738.2	397	ENSG00000171777	RASGRP4	RAS guanyl releasing protein 4	53.9028	-0.779537	0.331163	-2.35394	0.0185757	0.133458
chr6	155265002	155265330	328	*	Promoter (<=1kb)	6	155264013	155276548	12536	1	49861	ENST00000367165.3	990	ENSG00000171217	CLDN20	claudin 20	96.9729	-0.779453	0.276134	-2.82273	0.00476169	0.0605104
chrX	154619547	154619929	382	*	Promoter (<=1kb)	23	154617609	154619282	1674	2	1485	ENST00000359887.4	-266	ENSG00000184033	CTAG1B	cancer/testis antigen 1B	47.9728	-0.779102	0.415486	-1.87516	0.0607712	0.264731
chr7	75906285	75906460	175	*	Promoter (1-2kb)	7	75907576	75981096	73521	1	5447	ENST00000439963.5	-1116	ENSG00000127948	POR	cytochrome p450 oxidoreductase	21.0252	-0.778831	0.506119	-1.53883	0.123846	NA
chr7	138664306	138664318	12	*	Promoter (<=1kb)	7	138594286	138664224	69939	2	136306	ENST00000436657.5	-83	ENSG00000157703	SVOPL	SVOP like	8.37748	-0.778741	0.782226	-0.995544	0.319472	NA
chr2	230886094	230886292	198	*	Promoter (<=1kb)	2	230886474	230887814	1341	1	151484	ENST00000658438.1	-182	ENSG00000232520	GCSIR	GPR55 cis regulatory suppressor of immune response RNA	31.7959	-0.777914	0.445116	-1.74767	0.0805215	NA
chr16	18341495	18341930	435	*	Promoter (1-2kb)	16	18341622	18343097	1476	2	110006323	ENST00000545152.1	1167	NA	PKD1P4-NPIPA8	PKD1P4-NPIPA8 readthrough	108.295	-0.777723	0.253588	-3.06688	0.00216305	0.0376202
chr22	15689367	15689708	341	*	Promoter (<=1kb)	22	15690026	15721631	31606	1	23784	ENST00000343518.11	-318	ENSG00000198062	POTEH	POTE ankyrin domain family member H	77.9523	-0.777719	0.290057	-2.68127	0.0073344	0.0779894
chr2	233166110	233166507	397	*	Promoter (1-2kb)	2	233164301	233170576	6276	1	3635	ENST00000472517.1	1810	ENSG00000168918	INPP5D	inositol polyphosphate-5-phosphatase D	78.4216	-0.777719	0.267971	-2.90225	0.00370496	0.0520661
chr2	11170242	11170522	280	*	Promoter (1-2kb)	2	11172012	11178168	6157	1	130814	ENST00000487471.1	-1490	ENSG00000162976	SLC66A3	solute carrier family 66 member 3	44.8657	-0.777558	0.363605	-2.13847	0.0324784	0.18363
chr3	191314132	191314364	232	*	Promoter (1-2kb)	3	191277591	191316218	38628	2	257313	ENST00000463450.1	1854	ENSG00000188958	UTS2B	urotensin 2B	36.8557	-0.777237	0.428066	-1.8157	0.0694169	NA
chr3	37111747	37112114	367	*	Promoter (<=1kb)	3	37083645	37111915	28271	2	9209	ENST00000481682.1	0	ENSG00000093167	LRRFIP2	LRR binding FLII interacting protein 2	74.2431	-0.776907	0.285111	-2.72493	0.00643153	0.0720437
chr12	47777933	47778529	596	*	Promoter (<=1kb)	12	47778355	47779193	839	1	55652	ENST00000461620.1	0	ENSG00000211584	SLC48A1	solute carrier family 48 member 1	255.27	-0.776454	0.161738	-4.80069	1.58119e-06	0.000179563
chr17	81948657	81949154	497	*	Promoter (1-2kb)	17	81939645	81947233	7589	2	255275	ENST00000409745.2	-1425	ENSG00000185105	MYADML2	myeloid associated differentiation marker like 2	73.8756	-0.776427	0.280196	-2.77101	0.00558823	0.0663931
chr6	160123857	160123858	1	*	Promoter (1-2kb)	6	160121936	160158716	36781	1	6580	ENST00000460902.2	1922	ENSG00000175003	SLC22A1	solute carrier family 22 member 1	4.47817	-0.775517	1.0721	-0.723361	0.469458	NA
chr7	99700487	99700710	223	*	Promoter (<=1kb)	7	99685145	99700034	14890	2	100861540	ENST00000633513.1	-454	ENSG00000282301	CYP3A7-CYP3A51P	CYP3A7-CYP3A51P readthrough	36.0443	-0.775503	0.385132	-2.0136	0.0440512	NA
chr5	149430157	149430720	563	*	Promoter (<=1kb)	5	149430646	149430733	88	1	406937	ENST00000384967.1	0	ENSG00000276365	MIR145	microRNA 145	206.752	-0.774961	0.19115	-4.05419	5.03074e-05	0.00284172
chr16	84086551	84086563	12	*	Promoter (1-2kb)	16	84081522	84085026	3505	2	8720	ENST00000562788.2	-1526	ENSG00000140943	MBTPS1	membrane bound transcription factor peptidase, site 1	11.157	-0.774723	0.684957	-1.13105	0.258033	NA
chr2	111493088	111493317	229	*	Promoter (1-2kb)	2	111196999	111494685	297687	2	541471	ENST00000673958.1	1368	ENSG00000172965	MIR4435-2HG	MIR4435-2 host gene	113.127	-0.77453	0.23014	-3.36547	0.000764128	0.0197633
chr7	66086999	66087241	242	*	Promoter (<=1kb)	7	66087693	66092921	5229	1	435	ENST00000493708.5	-452	ENSG00000126522	ASL	argininosuccinate lyase	49.1273	-0.774197	0.34516	-2.24301	0.0248963	0.157394
chr16	28538030	28538227	197	*	Promoter (<=1kb)	16	28537507	28538951	1445	2	26471	ENST00000567646.1	724	ENSG00000176046	NUPR1	nuclear protein 1, transcriptional regulator	35.5972	-0.773822	0.436434	-1.77306	0.0762191	NA
chr20	57524484	57524742	258	*	Promoter (<=1kb)	20	57497164	57524867	27704	2	140690	ENST00000608263.5	125	ENSG00000124092	CTCFL	CCCTC-binding factor like	44.0275	-0.773136	0.362387	-2.13346	0.0328872	0.18493
chr17	28227156	28227629	473	*	Promoter (<=1kb)	17	28226563	28228065	1503	1	23615	ENST00000441253.2	594	ENSG00000237575	PYY2	peptide YY 2 (pseudogene)	73.8894	-0.772813	0.278996	-2.76998	0.00560596	0.0665233
chr20	51800549	51800621	72	*	Promoter (<=1kb)	20	51791983	51801586	9604	2	57167	ENST00000483130.1	965	ENSG00000101115	SALL4	spalt like transcription factor 4	15.8325	-0.772274	0.594056	-1.3	0.1936	NA
chr1	179591560	179591654	94	*	Promoter (<=1kb)	1	179591613	179691270	99658	1	163589	ENST00000367614.5	0	ENSG00000162782	TDRD5	tudor domain containing 5	20.6677	-0.772232	0.509235	-1.51646	0.129404	NA
chr12	94283234	94283273	39	*	Promoter (<=1kb)	12	94279819	94282844	3026	2	51134	ENST00000547927.1	-391	ENSG00000173588	CEP83	centrosomal protein 83	8.55709	-0.772078	0.786016	-0.982269	0.325968	NA
chr12	132117364	132117573	209	*	Promoter (<=1kb)	12	132118146	132131639	13494	1	347918	ENST00000475841.2	-573	ENSG00000185684	EP400P1	EP400 pseudogene 1	36.0167	-0.771463	0.399756	-1.92983	0.0536274	NA
chr19	17184725	17184769	44	*	Promoter (<=1kb)	19	17184511	17186000	1490	1	4650	ENST00000601490.1	215	ENSG00000099331	MYO9B	myosin IXB	15.7775	-0.771429	0.583236	-1.32267	0.185945	NA
chr9	68305591	68306195	604	*	Promoter (<=1kb)	9	68306528	68330436	23909	1	101929800	ENST00000603200.5	-333	NA	LOC101929800	uncharacterized LOC101929800	89.6944	-0.77132	0.276076	-2.79386	0.00520824	0.0637045
chr7	31121159	31121366	207	*	Promoter (1-2kb)	7	31119284	31119572	289	2	107986780	ENST00000438721.1	-1588	NA	LOC107986780	small integral membrane protein 14 pseudogene	44.716	-0.771169	0.359304	-2.14629	0.0318499	0.181547
chr6	150906300	150906467	167	*	Promoter (<=1kb)	6	150905670	150912948	7279	1	25902	ENST00000421497.1	631	ENSG00000120254	MTHFD1L	methylenetetrahydrofolate dehydrogenase (NADP+ dependent) 1 like	25.3459	-0.771154	0.468774	-1.64504	0.0999606	NA
chr7	73704456	73705310	854	*	Promoter (<=1kb)	7	73700783	73704496	3714	2	6804	ENST00000491427.5	0	ENSG00000106089	STX1A	syntaxin 1A	312.09	-0.770948	0.186305	-4.1381	3.50188e-05	0.00217442
chr3	64617776	64617899	123	*	Promoter (1-2kb)	3	64521481	64616150	94670	2	56999	ENST00000481060.2	-1627	ENSG00000163638	ADAMTS9	ADAM metallopeptidase with thrombospondin type 1 motif 9	33.0263	-0.770429	0.406414	-1.89568	0.0580029	NA
chr19	7006150	7006164	14	*	Promoter (<=1kb)	19	7005012	7006074	1063	2	497049	ENST00000598153.1	-77	NA	FLJ25758	microtubule affinity regulating kinase 1 pseudogene	11.0656	-0.770304	0.743032	-1.0367	0.299874	NA
chr16	16367709	16367905	196	*	Promoter (<=1kb)	16	16368876	16368942	67	1	102465683	ENST00000615389.1	-971	ENSG00000276311	MIR6511A3	microRNA 6511a-3	25.2149	-0.769274	0.469743	-1.63765	0.101495	NA
chr5	126812370	126812550	180	*	Promoter (<=1kb)	5	126811713	126821081	9369	1	4001	ENST00000494185.1	658	ENSG00000113368	LMNB1	lamin B1	34.6824	-0.769074	0.395187	-1.9461	0.0516425	NA
chr3	51862808	51862864	56	*	Promoter (1-2kb)	3	51861629	51863423	1795	1	389123	ENST00000429548.1	1180	ENSG00000184345	IQCF2	IQ motif containing F2	11.8716	-0.768869	0.679919	-1.13082	0.258129	NA
chr19	38290720	38290936	216	*	Promoter (<=1kb)	19	38290187	38292070	1884	1	10653	ENST00000587334.1	534	ENSG00000167642	SPINT2	serine peptidase inhibitor, Kunitz type 2	55.1668	-0.768226	0.323127	-2.37748	0.0174315	0.129129
chr8	124840377	124840579	202	*	Promoter (<=1kb)	8	124832263	124840524	8262	2	105375743	ENST00000655969.1	0	ENSG00000255491	LOC105375743	uncharacterized LOC105375743	37.6737	-0.768213	0.402804	-1.90717	0.0564991	NA
chr8	142876837	142876861	24	*	Promoter (1-2kb)	8	142872357	142875797	3441	2	1584	ENST00000519285.5	-1041	ENSG00000160882	CYP11B1	cytochrome P450 family 11 subfamily B member 1	11.2721	-0.76797	0.713692	-1.07605	0.281904	NA
chr12	131840767	131840869	102	*	Promoter (<=1kb)	12	131840025	131849981	9957	1	4326	ENST00000534865.1	743	ENSG00000198598	MMP17	matrix metallopeptidase 17	34.676	-0.767601	0.408453	-1.87929	0.0602051	NA
chr19	38596919	38597022	103	*	Promoter (<=1kb)	19	38593271	38597093	3823	2	11184	ENST00000588938.1	71	ENSG00000104814	MAP4K1	mitogen-activated protein kinase kinase kinase kinase 1	23.047	-0.767559	0.498995	-1.53821	0.123997	NA
chr2	237549959	237550197	238	*	Promoter (1-2kb)	2	237552027	237553811	1785	1	79083	ENST00000489967.1	-1830	ENSG00000115648	MLPH	melanophilin	46.7923	-0.7672	0.34633	-2.21523	0.0267444	0.164556
chr7	117184510	117184738	228	*	Promoter (1-2kb)	7	117182681	117219090	36410	1	93655	ENST00000543837.5	1830	ENSG00000004866	ST7-OT3	ST7 overlapping transcript 3	57.1926	-0.766927	0.356723	-2.14992	0.0315616	0.180703
chr7	50605091	50605160	69	*	Promoter (1-2kb)	7	50604909	50606413	1505	2	2887	ENST00000482397.1	1253	ENSG00000106070	GRB10	growth factor receptor bound protein 10	17.1311	-0.766313	0.560094	-1.36819	0.171254	NA
chr16	554635	554934	299	*	Promoter (1-2kb)	16	552755	554636	1882	1	6650	ENST00000566977.1	1881	ENSG00000103326	CAPN15	calpain 15	139.517	-0.766031	0.209795	-3.65133	0.00026089	0.00948816
chr7	75953551	75953908	357	*	Promoter (<=1kb)	7	75953989	75986540	32552	1	5447	ENST00000412064.6	-81	ENSG00000127948	POR	cytochrome p450 oxidoreductase	48.8441	-0.765536	0.340046	-2.25127	0.0243685	0.155471
chr14	67413756	67414742	986	*	Promoter (1-2kb)	14	67397746	67412167	14422	2	26499	ENST00000557388.1	-1590	ENSG00000100558	PLEK2	pleckstrin 2	655.822	-0.765442	0.13318	-5.74742	9.06135e-09	2.32404e-06
chr4	85930382	85930402	20	*	Promoter (<=1kb)	4	85930273	86002668	72396	1	83478	ENST00000264343.4	110	ENSG00000138639	ARHGAP24	Rho GTPase activating protein 24	7.51357	-0.765039	0.838623	-0.912256	0.361634	NA
chr22	17548472	17548847	375	*	Promoter (<=1kb)	22	17548999	17558151	9153	1	27443	ENST00000355219.4	-152	ENSG00000099954	CECR2	CECR2 histone acetyl-lysine reader	52.8364	-0.764519	0.325606	-2.34799	0.0188751	0.134669
chr22	25281591	25282713	1122	*	Promoter (<=1kb)	22	25279529	25282291	2763	2	105372969	ENST00000411511.5	0	NA	LOC105372969	uncharacterized LOC105372969	129.501	-0.764146	0.251254	-3.04132	0.00235541	0.0395761
chr3	194226022	194226310	288	*	Promoter (<=1kb)	3	194203018	194226350	23333	2	100505920	ENST00000658228.1	40	NA	LINC02036	long intergenic non-protein coding RNA 2036	41.0838	-0.76413	0.375485	-2.03505	0.041846	NA
chr13	33207447	33207911	464	*	Promoter (1-2kb)	13	33103170	33206006	102837	2	90627	ENST00000399365.7	-1442	ENSG00000133121	STARD13	StAR related lipid transfer domain containing 13	95.2621	-0.762959	0.252923	-3.01656	0.00255659	0.0416754
chr1	94658175	94658593	418	*	Promoter (<=1kb)	1	94657925	94658250	326	2	101928079	ENST00000456551.1	0	ENSG00000224081	SLC44A3-AS1	SLC44A3 antisense RNA 1	55.6621	-0.762942	0.31676	-2.40858	0.0160148	0.122944
chr5	1709038	1709128	90	*	Promoter (<=1kb)	5	1708785	1708868	84	2	100422966	ENST00000578298.1	-171	ENSG00000263746	MIR4277	microRNA 4277	9.72574	-0.762715	0.733518	-1.0398	0.298431	NA
chr19	11227293	11227685	392	*	Promoter (1-2kb)	19	11228840	11229332	493	2	57572	ENST00000590452.1	1647	ENSG00000130158	DOCK6	dedicator of cytokinesis 6	65.8729	-0.762334	0.298128	-2.55707	0.0105558	0.096295
chr13	36954651	36954845	194	*	Promoter (1-2kb)	13	36949849	36953026	3178	2	29880	ENST00000486410.2	-1626	ENSG00000120697	ALG5	ALG5 dolichyl-phosphate beta-glucosyltransferase	57.884	-0.76207	0.341135	-2.23392	0.0254881	0.159707
chr20	363231	363529	298	*	Promoter (<=1kb)	20	362835	391386	28552	1	57761	ENST00000615226.4	397	ENSG00000101255	TRIB3	tribbles pseudokinase 3	76.6219	-0.761822	0.282494	-2.69677	0.00700147	0.0758616
chr14	100526771	100526958	187	*	Promoter (<=1kb)	14	100525946	100529624	3679	1	79446	ENST00000555201.1	826	ENSG00000176473	WDR25	WD repeat domain 25	60.8759	-0.761543	0.339369	-2.244	0.0248326	0.157272
chr1	149009876	149010016	140	*	Promoter (1-2kb)	1	149008449	149021766	13318	1	9659	ENST00000479369.6	1428	ENSG00000178104	PDE4DIP	phosphodiesterase 4D interacting protein	24.278	-0.761462	0.484514	-1.5716	0.116043	NA
chr16	56669576	56669745	169	*	Promoter (<=1kb)	16	56669814	56671129	1316	1	4496	ENST00000332374.5	-69	ENSG00000205358	MT1H	metallothionein 1H	40.2567	-0.761449	0.378118	-2.01379	0.044032	NA
chr17	9926219	9926579	360	*	Promoter (<=1kb)	17	9917168	9926994	9827	2	8522	ENST00000578456.1	415	ENSG00000007237	GAS7	growth arrest specific 7	52.7189	-0.761399	0.330371	-2.30468	0.0211847	0.143638
chr9	86414109	86414294	185	*	Promoter (<=1kb)	9	86414201	86452718	38518	1	102724080	ENST00000660690.1	0	NA	LOC102724080	uncharacterized LOC102724080	36.3318	-0.761273	0.474647	-1.60387	0.108742	NA
chr7	5389221	5389348	127	*	Promoter (1-2kb)	7	5376114	5388029	11916	2	84629	ENST00000413081.1	-1193	ENSG00000182095	TNRC18	trinucleotide repeat containing 18	23.75	-0.761121	0.474021	-1.60567	0.108347	NA
chr2	87445550	87445672	122	*	Promoter (<=1kb)	2	87439842	87445756	5915	2	101928173	ENST00000629820.1	84	NA	LINC01943	long intergenic non-protein coding RNA 1943	29.264	-0.760927	0.438718	-1.73443	0.0828412	NA
chr2	33727323	33727491	168	*	Promoter (<=1kb)	2	33727566	33954012	226447	1	104355287	ENST00000671333.1	-75	ENSG00000228262	LINC01317	long intergenic non-protein coding RNA 1317	32.5898	-0.760901	0.412459	-1.84479	0.0650676	NA
chr18	47034843	47035166	323	*	Promoter (<=1kb)	18	47032527	47035621	3095	2	51224	ENST00000332567.6	455	ENSG00000206181	ELOA2	elongin A2	77.0986	-0.760824	0.294769	-2.58108	0.00984905	0.0925024
chr18	11902711	11903068	357	*	Promoter (<=1kb)	18	11897056	11902755	5700	2	65258	ENST00000589859.1	0	ENSG00000154889	MPPE1	metallophosphoesterase 1	52.0093	-0.760423	0.32957	-2.30732	0.0210372	0.14307
chr9	40321934	40322186	252	*	Promoter (<=1kb)	9	40321299	40329218	7920	1	100133036	ENST00000455995.5	636	ENSG00000223839	FAM95B1	family with sequence similarity 95 member B1	44.0101	-0.760412	0.358297	-2.1223	0.033813	0.187831
chr12	113162611	113162675	64	*	Promoter (1-2kb)	12	113158575	113161490	2916	2	79039	ENST00000549271.1	-1122	ENSG00000123064	DDX54	DEAD-box helicase 54	16.6272	-0.760382	0.582335	-1.30575	0.191638	NA
chr17	80169794	80169942	148	*	Promoter (<=1kb)	17	80169992	80208971	38980	1	79092	ENST00000650867.1	-50	ENSG00000141527	CARD14	caspase recruitment domain family member 14	22.266	-0.760364	0.491866	-1.54588	0.122134	NA
chr12	130163516	130163545	29	*	Promoter (1-2kb)	12	130162464	130165740	3277	1	11211	ENST00000229030.5	1053	ENSG00000111432	FZD10	frizzled class receptor 10	14.9361	-0.759882	0.598596	-1.26944	0.204284	NA
chr16	4852262	4852760	498	*	Promoter (<=1kb)	16	4852215	4882360	30146	1	29855	ENST00000396658.8	48	ENSG00000118900	UBN1	ubinuclein 1	257.545	-0.759803	0.172386	-4.40758	1.04534e-05	0.000840988
chr2	96788243	96788726	483	*	Promoter (<=1kb)	2	96788590	96797610	9021	1	26504	ENST00000482716.5	0	ENSG00000158158	CNNM4	cyclin and CBS domain divalent metal cation transport mediator 4	93.3591	-0.75964	0.254197	-2.98839	0.00280452	0.0442046
chr5	160197265	160197632	367	*	Promoter (1-2kb)	5	160195744	160199095	3352	2	105377690	ENST00000524005.1	1463	NA	FABP6-AS1	FABP6 antisense RNA 1	72.618	-0.758949	0.280926	-2.7016	0.00690072	0.0752347
chr2	43293511	43294148	637	*	Promoter (<=1kb)	2	43286985	43293066	6082	2	63892	ENST00000485018.1	-446	ENSG00000115970	THADA	THADA armadillo repeat containing	199.682	-0.758915	0.191224	-3.96871	7.22614e-05	0.00374186
chr20	35626270	35626399	129	*	Promoter (<=1kb)	20	35626044	35626853	810	2	8904	ENST00000462352.5	454	ENSG00000214078	CPNE1	copine 1	19.5704	-0.758609	0.569905	-1.33112	0.183151	NA
chr1	24107918	24108120	202	*	Promoter (<=1kb)	1	24081549	24108439	26891	2	127294	ENST00000475306.1	319	ENSG00000142661	MYOM3	myomesin 3	123.762	-0.7586	0.229407	-3.30679	0.000943701	0.0225559
chr14	101916397	101917030	633	*	Promoter (<=1kb)	14	101917769	101925449	7681	1	5527	ENST00000554147.1	-739	ENSG00000078304	PPP2R5C	protein phosphatase 2 regulatory subunit B'gamma	83.8982	-0.758484	0.262964	-2.88436	0.0039221	0.0537939
chr5	172081578	172081763	185	*	Promoter (<=1kb)	5	172064365	172082405	18041	2	6793	ENST00000522879.1	642	ENSG00000072786	STK10	serine/threonine kinase 10	31.8183	-0.758408	0.425956	-1.78049	0.0749966	NA
chr10	101625922	101626059	137	*	Promoter (<=1kb)	10	101610664	101626899	16236	2	6468	ENST00000470093.5	840	ENSG00000107829	FBXW4	F-box and WD repeat domain containing 4	24.5823	-0.757742	0.480876	-1.57576	0.115082	NA
chr5	135386997	135387526	529	*	Promoter (1-2kb)	5	135359722	135389059	29338	2	9555	ENST00000513210.5	1533	ENSG00000113648	MACROH2A1	macroH2A.1 histone	151.925	-0.757539	0.203314	-3.72596	0.000194576	0.0077445
chrX	52494996	52495237	241	*	Promoter (<=1kb)	23	52495808	52500812	5005	1	653220	ENST00000375602.2	-571	ENSG00000204379	XAGE1A	X antigen family member 1A	38.4482	-0.757404	0.392373	-1.93031	0.0535681	NA
chr5	81068095	81068397	302	*	Promoter (1-2kb)	5	81070024	81088564	18541	1	5924	ENST00000502677.1	-1627	ENSG00000113319	RASGRF2	Ras protein specific guanine nucleotide releasing factor 2	89.1808	-0.756855	0.289838	-2.6113	0.00901985	0.087743
chr6	169162838	169163524	686	*	Promoter (<=1kb)	6	169157207	169162992	5786	2	101929484	ENST00000657431.1	0	ENSG00000223485	LINC01615	long intergenic non-protein coding RNA 1615	554.477	-0.756527	0.656081	-1.1531	0.248869	0.571151
chr3	195086565	195086713	148	*	Promoter (<=1kb)	3	195069593	195087372	17780	2	152002	ENST00000460582.1	659	ENSG00000173950	XXYLT1	xyloside xylosyltransferase 1	25.1346	-0.756058	0.477015	-1.58498	0.112972	NA
chr1	6026454	6026469	15	*	Promoter (<=1kb)	1	6026361	6072788	46428	1	8514	ENST00000655703.1	94	ENSG00000069424	KCNAB2	potassium voltage-gated channel subfamily A regulatory beta subunit 2	9.10786	-0.755483	0.794597	-0.950775	0.341719	NA
chr5	33984457	33984457	0	*	Promoter (<=1kb)	5	33963642	33984562	20921	2	51151	ENST00000505056.1	105	ENSG00000164175	SLC45A2	solute carrier family 45 member 2	2.41583	-0.755177	1.51141	-0.499652	0.61732	NA
chr15	71791191	71791588	397	*	Promoter (1-2kb)	15	71792638	71818259	25622	1	10002	ENST00000621736.4	-1050	ENSG00000278570	NR2E3	nuclear receptor subfamily 2 group E member 3	81.6465	-0.754273	0.283851	-2.65729	0.00787725	0.0811867
chr11	46889332	46889541	209	*	Promoter (<=1kb)	11	46883924	46889687	5764	2	4038	ENST00000529921.1	146	ENSG00000134569	LRP4	LDL receptor related protein 4	35.9356	-0.754213	0.392193	-1.92307	0.0544716	NA
chr1	230714125	230714243	118	*	Promoter (<=1kb)	1	230702155	230714145	11991	2	183	ENST00000680041.1	0	ENSG00000135744	AGT	angiotensinogen	35.533	-0.754051	0.391598	-1.92558	0.0541572	NA
chr5	151092866	151093059	193	*	Promoter (<=1kb)	5	151060354	151093577	33224	2	10318	ENST00000521001.1	518	ENSG00000145901	TNIP1	TNFAIP3 interacting protein 1	86.728	-0.753328	0.267119	-2.82019	0.00479952	0.0608102
chr1	16606799	16607127	328	*	Promoter (1-2kb)	1	16593562	16608650	15089	2	55672	ENST00000420513.1	1523	ENSG00000219481	NBPF1	NBPF member 1	67.1666	-0.753119	0.328517	-2.29248	0.0218781	0.146108
chr11	84437734	84437853	119	*	Promoter (<=1kb)	11	84098995	84437809	338815	2	1740	ENST00000527466.1	0	ENSG00000150672	DLG2	discs large MAGUK scaffold protein 2	21.001	-0.752796	0.511262	-1.47243	0.140906	NA
chr6	169242103	169242288	185	*	Promoter (1-2kb)	6	169215848	169240592	24745	2	7058	ENST00000676941.1	-1512	ENSG00000186340	THBS2	thrombospondin 2	30.1427	-0.752741	0.437832	-1.71925	0.0855697	NA
chr2	218679004	218679590	586	*	Promoter (<=1kb)	2	218680050	218689863	9814	1	27148	ENST00000414413.5	-460	ENSG00000163482	STK36	serine/threonine kinase 36	105.353	-0.752561	0.241529	-3.11583	0.00183431	0.0341261
chr19	45032967	45033156	189	*	Promoter (<=1kb)	19	45032708	45038122	5415	1	5971	ENST00000589972.1	260	ENSG00000104856	RELB	RELB proto-oncogene, NF-kB subunit	33.4335	-0.752548	0.40398	-1.86284	0.0624854	NA
chr1	2116168	2116331	163	*	Promoter (<=1kb)	1	2116205	2150897	34693	1	5590	ENST00000470511.5	0	ENSG00000067606	PRKCZ	protein kinase C zeta	35.2222	-0.752408	0.395088	-1.90441	0.0568571	NA
chr19	40513356	40513535	179	*	Promoter (<=1kb)	19	40512614	40575569	62956	1	57731	ENST00000597389.5	743	ENSG00000160460	SPTBN4	spectrin beta, non-erythrocytic 4	31.3661	-0.752315	0.443013	-1.69818	0.0894738	NA
chr19	41896179	41896389	210	*	Promoter (<=1kb)	19	41895379	41930150	34772	1	9138	ENST00000599589.5	801	ENSG00000076928	ARHGEF1	Rho guanine nucleotide exchange factor 1	49.8174	-0.752201	0.360754	-2.08508	0.0370621	0.197865
chr4	46993309	46993742	433	*	Promoter (<=1kb)	4	46918900	46993581	74682	2	2557	ENST00000264318.4	0	ENSG00000109158	GABRA4	gamma-aminobutyric acid type A receptor subunit alpha4	59.2317	-0.752162	0.309572	-2.42968	0.0151121	0.118578
chr19	3493894	3494012	118	*	Promoter (<=1kb)	19	3491310	3494171	2862	2	83475	ENST00000673168.1	159	ENSG00000129932	DOHH	deoxyhypusine hydroxylase	20.7682	-0.751674	0.524436	-1.4333	0.151772	NA
chr7	150799961	150800099	138	*	Promoter (<=1kb)	7	150791285	150800352	9068	2	28959	ENST00000492607.5	253	ENSG00000106565	TMEM176B	transmembrane protein 176B	33.1253	-0.751519	0.414608	-1.8126	0.0698933	NA
chr5	151095329	151096007	678	*	Promoter (1-2kb)	5	151060354	151093577	33224	2	10318	ENST00000521001.1	-1753	ENSG00000145901	TNIP1	TNFAIP3 interacting protein 1	310.504	-0.751053	0.15264	-4.9204	8.6366e-07	0.000109046
chr22	24608315	24608615	300	*	Promoter (<=1kb)	22	24607664	24615125	7462	1	2678	ENST00000428855.5	652	ENSG00000100031	GGT1	gamma-glutamyltransferase 1	56.7755	-0.750951	0.327047	-2.29615	0.021667	0.145361
chr17	8264522	8264717	195	*	Promoter (1-2kb)	17	8265973	8267229	1257	1	5198	ENST00000578979.5	-1256	ENSG00000178921	PFAS	phosphoribosylformylglycinamidine synthase	37.747	-0.750801	0.382055	-1.96517	0.0493949	NA
chr9	2570701	2571053	352	*	Promoter (<=1kb)	9	2535652	2570754	35103	2	401491	ENST00000424605.5	0	ENSG00000236404	VLDLR-AS1	VLDLR antisense RNA 1	68.6885	-0.750745	0.339699	-2.21003	0.0271029	0.165831
chr5	59276893	59277318	425	*	Promoter (<=1kb)	5	58974561	59276119	301559	2	5144	ENST00000503258.5	-775	ENSG00000113448	PDE4D	phosphodiesterase 4D	70.4173	-0.750125	0.330054	-2.27273	0.0230422	0.150476
chr17	17675998	17676131	133	*	Promoter (1-2kb)	17	17674026	17677688	3663	2	105371564	ENST00000456090.2	1557	ENSG00000223979	SMCR2	Smith-Magenis syndrome chromosome region, candidate 2	31.5613	-0.750041	0.44002	-1.70456	0.088276	NA
chr1	160775607	160775766	159	*	Promoter (<=1kb)	1	160775954	160776608	655	2	105371470	ENST00000620690.1	842	NA	LOC105371470	uncharacterized LOC105371470	35.2829	-0.749848	0.398381	-1.88224	0.0598036	NA
chr17	41625666	41625912	246	*	Promoter (<=1kb)	17	41621026	41624842	3817	2	3872	ENST00000463128.5	-825	ENSG00000128422	KRT17	keratin 17	46.6166	-0.749756	0.365581	-2.05086	0.0402804	0.207596
chr14	71242070	71242731	661	*	Promoter (1-2kb)	14	71179053	71243841	64789	2	107984695	ENST00000663930.1	1110	NA	LOC107984695	uncharacterized LOC107984695	112.01	-0.74964	0.251095	-2.98548	0.00283135	0.0443795
chr7	2271818	2272156	338	*	Promoter (<=1kb)	7	2257666	2271896	14231	2	29886	ENST00000479689.1	0	ENSG00000106266	SNX8	sorting nexin 8	52.8054	-0.749526	0.327113	-2.29134	0.021944	0.146339
chr16	16308346	16308724	378	*	Promoter (1-2kb)	16	16309879	16309966	88	1	100422956	ENST00000581748.2	-1155	ENSG00000265373	MIR3180-2	microRNA 3180-2	55.8405	-0.749448	0.319929	-2.34255	0.0191526	0.135685
chr4	52020310	52020543	233	*	Promoter (<=1kb)	4	51993652	52020363	26712	2	339977	ENST00000682860.1	0	ENSG00000188993	LRRC66	leucine rich repeat containing 66	69.6843	-0.749445	0.296366	-2.52879	0.0114458	0.101036
chr14	100406548	100406846	298	*	Promoter (<=1kb)	14	100406599	100408928	2330	1	105370664	ENST00000556080.2	0	NA	LOC105370664	uncharacterized LOC105370664	71.0346	-0.749376	0.291863	-2.56756	0.0102417	0.094492
chr8	125362448	125362585	137	*	Promoter (<=1kb)	8	125363026	125367116	4091	1	286053	ENST00000521460.1	-441	ENSG00000156831	NSMCE2	NSE2 (MMS21) homolog, SMC5-SMC6 complex SUMO ligase	28.2674	-0.748307	0.463935	-1.61296	0.106754	NA
chr2	88540287	88540678	391	*	Promoter (1-2kb)	2	88538720	88575610	36891	1	101928371	ENST00000413234.1	1568	ENSG00000225420	LOC101928371	uncharacterized LOC101928371	81.3822	-0.748303	0.277567	-2.69594	0.00701904	0.0759599
chr7	29970249	29970477	228	*	Promoter (<=1kb)	7	29944097	29969938	25842	2	9805	ENST00000438497.5	-312	ENSG00000136193	SCRN1	secernin 1	53.3398	-0.748072	0.338022	-2.21308	0.0268918	0.165121
chrX	623931	624042	111	*	Promoter (<=1kb)	23	624344	646823	22480	1	6473	ENST00000381578.6	-302	ENSG00000185960	SHOX	short stature homeobox	15.9356	-0.747747	0.596492	-1.25357	0.209997	NA
chr13	20231038	20231112	74	*	Promoter (<=1kb)	13	20223245	20230978	7734	2	10804	ENST00000646108.1	-61	ENSG00000121742	GJB6	gap junction protein beta 6	23.3012	-0.747582	0.508212	-1.471	0.14129	NA
chr8	22196773	22196935	162	*	Promoter (1-2kb)	8	22198416	22201482	3067	1	649	ENST00000522332.1	-1481	ENSG00000168487	BMP1	bone morphogenetic protein 1	47.9106	-0.747566	0.341824	-2.18699	0.0287431	0.171463
chr2	131444956	131445115	159	*	Promoter (<=1kb)	2	131442644	131444587	1944	2	401010	ENST00000407594.2	-370	NA	NOC2LP2	NOC2 like nucleolar associated transcriptional repressor pseudogene 2	35.188	-0.747434	0.416419	-1.79491	0.0726686	NA
chr7	30551560	30551715	155	*	Promoter (<=1kb)	7	30544794	30552177	7384	2	401320	ENST00000625565.2	462	NA	GARS1-DT	GARS1 divergent transcript	24.8203	-0.747353	0.491136	-1.52168	0.128088	NA
chr1	1738947	1739175	228	*	Promoter (<=1kb)	1	1734690	1739557	4868	2	9906	ENST00000643943.1	382	ENSG00000215790	SLC35E2A	solute carrier family 35 member E2A	38.6737	-0.746762	0.41276	-1.80919	0.070421	NA
chr3	49057352	49057561	209	*	Promoter (<=1kb)	3	49033083	49057875	24793	2	54870	ENST00000479449.1	314	ENSG00000198218	QRICH1	glutamine rich 1	27.5718	-0.746662	0.463882	-1.6096	0.107486	NA
chr6	159587726	159587936	210	*	Promoter (1-2kb)	6	159586955	159589169	2215	2	105378085	ENST00000430078.1	1233	NA	LOC105378085	uncharacterized LOC105378085	30.5178	-0.746446	0.445426	-1.6758	0.0937771	NA
chr17	35150133	35150324	191	*	Promoter (1-2kb)	17	35148264	35186559	38296	1	146862	ENST00000591048.2	1870	ENSG00000141161	UNC45B	unc-45 myosin chaperone B	36.369	-0.745671	0.40312	-1.84975	0.0643498	NA
chr10	26936697	26936934	237	*	Promoter (<=1kb)	10	26931206	26937859	6654	2	387644	ENST00000639963.1	925	ENSG00000283709	FAM238C	family with sequence similarity 238 member C	53.1918	-0.745323	0.358711	-2.07778	0.0377297	0.199796
chr5	1293775	1293946	171	*	Promoter (1-2kb)	5	1253728	1294989	41262	2	7015	ENST00000334602.10	1043	ENSG00000164362	TERT	telomerase reverse transcriptase	34.8836	-0.745019	0.398745	-1.86841	0.0617046	NA
chr2	97763522	97763693	171	*	Promoter (1-2kb)	2	97756333	97765317	8985	2	23505	ENST00000485245.2	1624	ENSG00000075568	TMEM131	transmembrane protein 131	43.1583	-0.744973	0.358007	-2.08089	0.0374438	0.198923
chr12	50100061	50100142	81	*	Promoter (<=1kb)	12	50099430	50100318	889	1	6602	ENST00000549526.1	632	ENSG00000066117	SMARCD1	SWI/SNF related, matrix associated, actin dependent regulator of chromatin, subfamily d, member 1	17.024	-0.744794	0.553908	-1.34462	0.178749	NA
chr18	33605142	33605606	464	*	Promoter (<=1kb)	18	33605586	33670684	65099	1	80816	ENST00000586327.6	0	ENSG00000141431	ASXL3	ASXL transcriptional regulator 3	86.532	-0.744416	0.315872	-2.3567	0.0184381	0.132912
chr18	32770117	32770533	416	*	Promoter (<=1kb)	18	32769795	32774413	4619	1	105372055	ENST00000426194.1	323	NA	LOC105372055	uncharacterized LOC105372055	57.2498	-0.744316	0.312834	-2.37927	0.0173469	0.128829
chr10	69874503	69874952	449	*	Promoter (<=1kb)	10	69875137	69932661	57525	1	1305	ENST00000684387.1	-185	ENSG00000197467	COL13A1	collagen type XIII alpha 1 chain	185.059	-0.74422	0.221709	-3.35673	0.00078869	0.0201755
chr14	59263118	59263396	278	*	Promoter (<=1kb)	14	59263455	59371405	107951	1	23002	ENST00000395125.1	-59	ENSG00000100592	DAAM1	dishevelled associated activator of morphogenesis 1	39.6442	-0.744124	0.394727	-1.88516	0.0594081	NA
chr9	127340646	127341408	762	*	Promoter (<=1kb)	9	127342315	127355449	13135	1	84253	ENST00000460176.6	-907	ENSG00000136895	GARNL3	GTPase activating Rap/RanGAP domain like 3	175.716	-0.743854	0.186781	-3.98249	6.81962e-05	0.00358531
chr16	63617761	63617858	97	*	Promoter (<=1kb)	16	63520857	63618037	97181	2	105371308	ENST00000655786.1	179	NA	LOC105371308	uncharacterized LOC105371308	22.7579	-0.743313	0.519941	-1.42961	0.152829	NA
chr10	87066951	87067039	88	*	Promoter (1-2kb)	10	87050618	87068157	17540	2	2746	ENST00000684434.1	1118	ENSG00000148672	GLUD1	glutamate dehydrogenase 1	22.1416	-0.743162	0.491734	-1.51131	0.13071	NA
chr22	21673581	21673744	163	*	Promoter (1-2kb)	22	21672330	21673609	1280	1	23759	ENST00000485930.1	1252	ENSG00000100023	PPIL2	peptidylprolyl isomerase like 2	29.1631	-0.74306	0.431849	-1.72065	0.0853147	NA
chr17	16282577	16282712	135	*	Promoter (<=1kb)	17	16282014	16282088	75	1	100302124	ENST00000408428.1	564	ENSG00000221355	MIR1288	microRNA 1288	74.8381	-0.742769	0.292113	-2.54274	0.0109986	0.0987783
chr12	10311358	10311693	335	*	Promoter (1-2kb)	12	10313494	10315637	2144	1	3824	ENST00000539792.1	-1801	ENSG00000134539	KLRD1	killer cell lectin like receptor D1	119.708	-0.74275	0.235274	-3.15695	0.00159427	0.0314408
chr17	39132274	39132427	153	*	Promoter (<=1kb)	17	39067132	39132037	64906	2	57125	ENST00000493200.5	-238	ENSG00000161381	PLXDC1	plexin domain containing 1	28.6084	-0.742691	0.448661	-1.65535	0.0978535	NA
chr12	119188730	119189389	659	*	Promoter (1-2kb)	12	119187025	119193858	6834	1	26353	ENST00000675211.1	1706	ENSG00000152137	HSPB8	heat shock protein family B (small) member 8	170.389	-0.742666	0.195147	-3.80568	0.000141413	0.00616835
chr19	34646180	34646394	214	*	Promoter (<=1kb)	19	34645662	34646070	409	1	100130342	ENST00000599388.2	519	NA	SCGB2B3P	secretoglobin family 2B member 3, pseudogene	35.3498	-0.742061	0.400496	-1.85286	0.0639028	NA
chr1	32223707	32224034	327	*	Promoter (1-2kb)	1	32222440	32229208	6769	1	8668	ENST00000483517.5	1268	ENSG00000084623	EIF3I	eukaryotic translation initiation factor 3 subunit I	84.2476	-0.741517	0.260001	-2.85198	0.00434483	0.0571425
[truncated: 35,451 more rows]

## Sheet: FOXO1_inhib_RNAseq
Row.names	baseMean	log2FoldChange	lfcSE	stat	pvalue	padj	hgnc_symbol
ENSG00000000003	2221.3	-0.0653144	0.132936	-0.491323	0.623198	0.861212	TSPAN6
[truncated: 22,881 more rows]

## Sheet: FOXO1_inhib_ATAC
peak_id	logFC	logCPM	F	PValue	FDR	Chr	Start	End	annotation	geneId	SYMBOL	GENENAME
[truncated: 753 more rows]

[truncated: 2 more sheets: FOXO1_inhib_SMAD23_CR, FOXO1_inhib_SMAD1_CR]
