# Supplementary material for: FOXO1 unlocks SMAD function to drive mechano-induced endothelial-to-mesenchymal transition
Source: Research Square preprint supplement (doi:10.21203/rs.3.rs-8347032/v1), 2026-01-14
Supplement: Supplementary file 2 [file 930fcb76247971e03eb47646.docx]

**
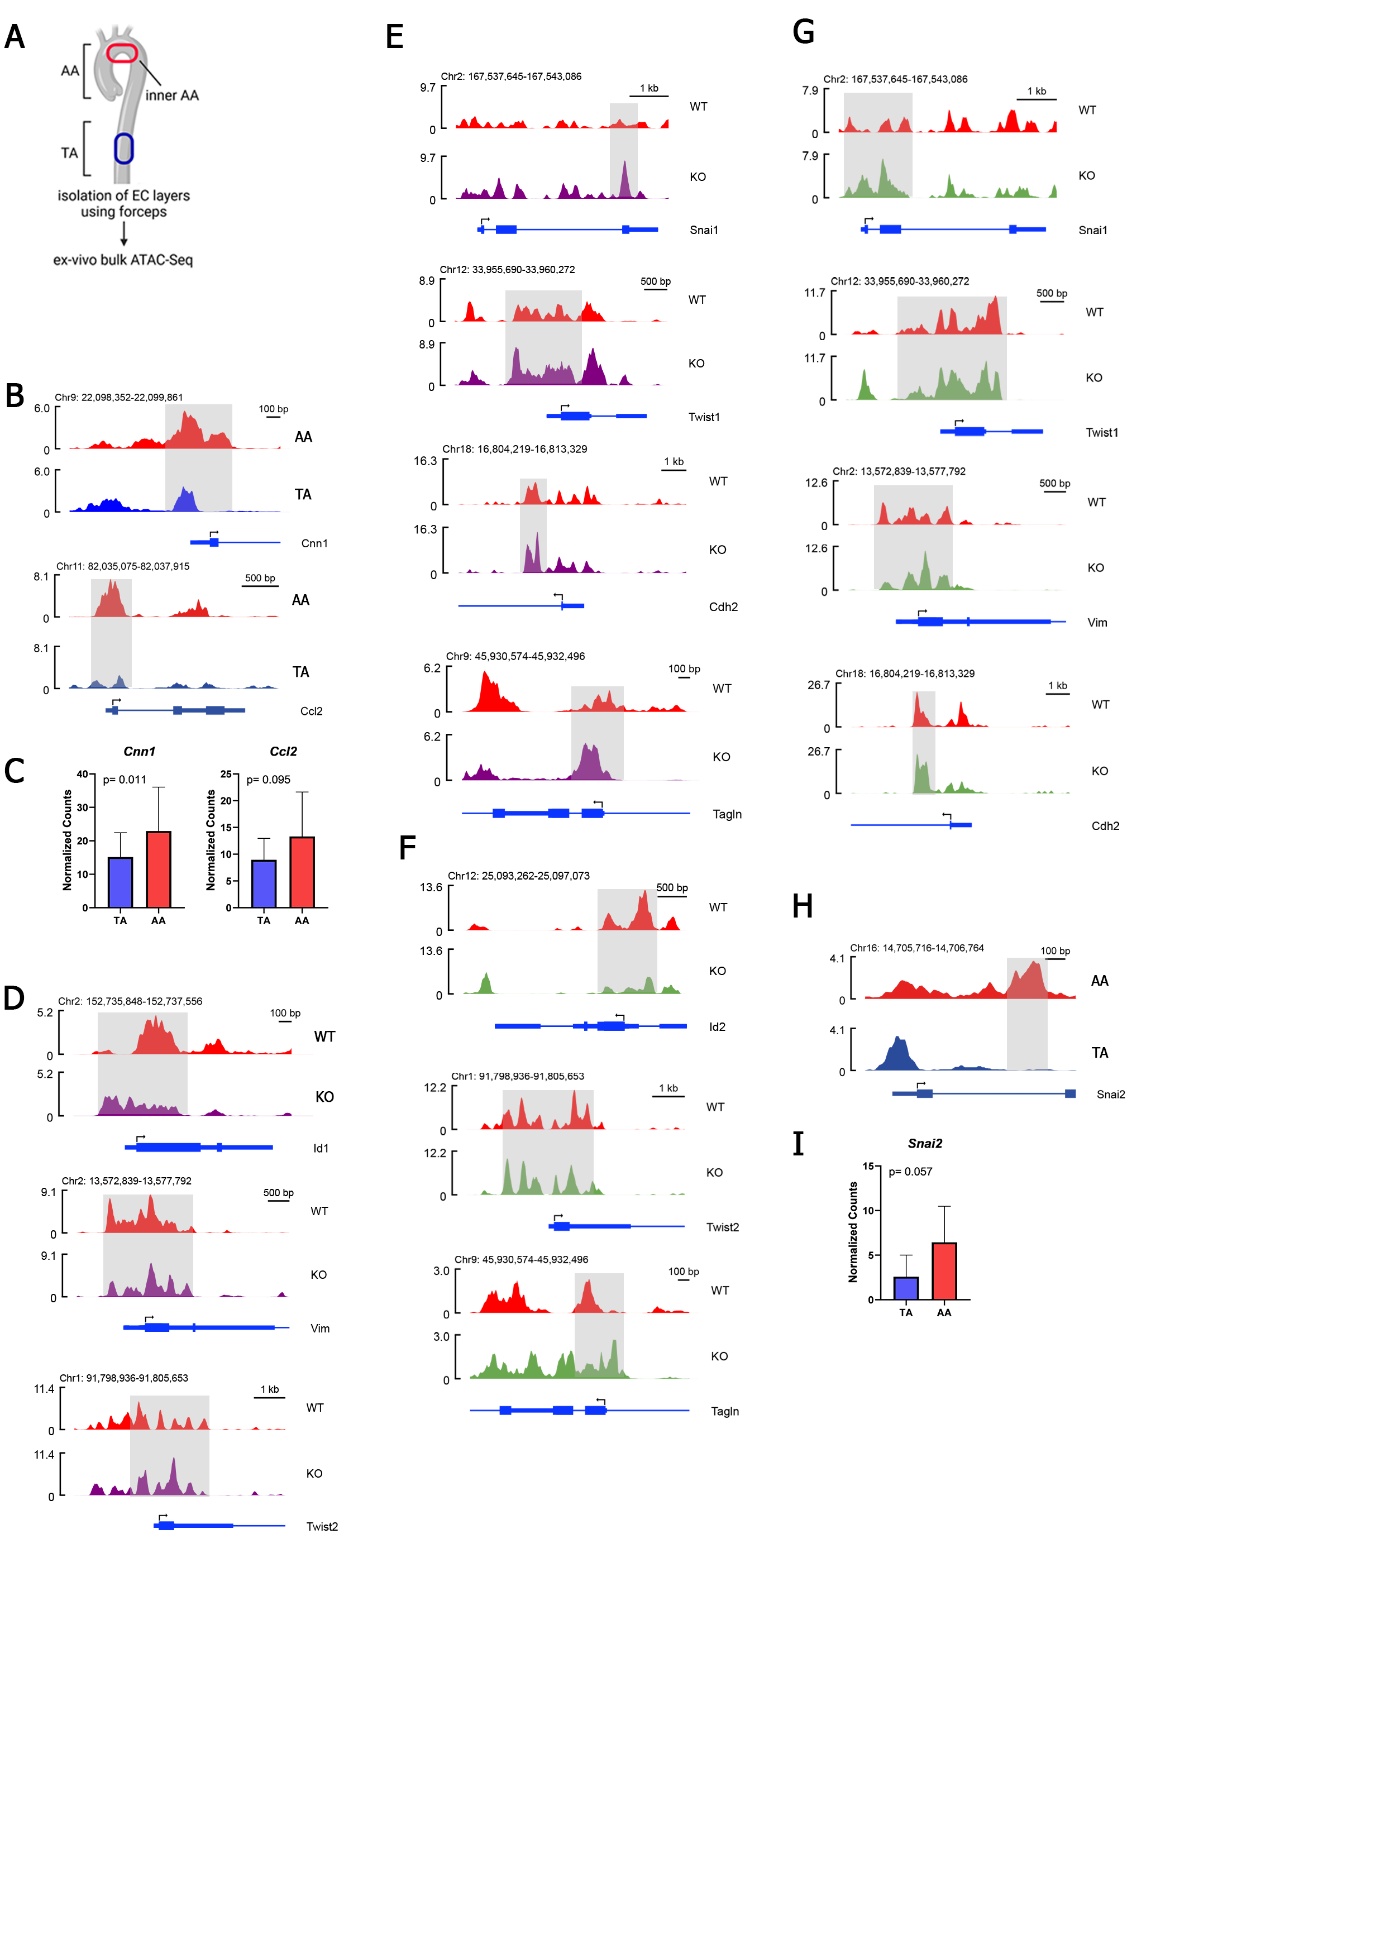
Figure S1. A** Isolation of ECs from the inner curve of the aortic arch (AA) or the thoracic aorta (TA) for bulk ATAC-Seq. **B**,**H** Genome browser views of ATAC-Seq tracks of ECs isolated either from the TA (blue) or AA (red). Regions highlighted in grey have been used for testing of differential accessibility in **C**. **C** Bar plots depicting normalized counts in peak regions highlighted in **B**. Statistics have been calculated using a one-sided Student’s t-test. **D**,**E** Genome browser views of ATAC-Seq tracks from ECs isolated from SMAD1/5 knock-out (purple) versus control (red) mice. Regions highlighted in grey have been used for testing of differential accessibility in Figure 1. **F**,**G** Genome browser views of ATAC-Seq tracks from ECs isolated from SMAD2/3 knock-out (green) versus control (red) mice. Regions highlighted in grey have been used for testing of differential accessibility in Figure 1. **I** Bar plots depicting normalized counts in peak regions highlighted in **H**. Statistics have been calculated using a one-sided Student’s t-test.


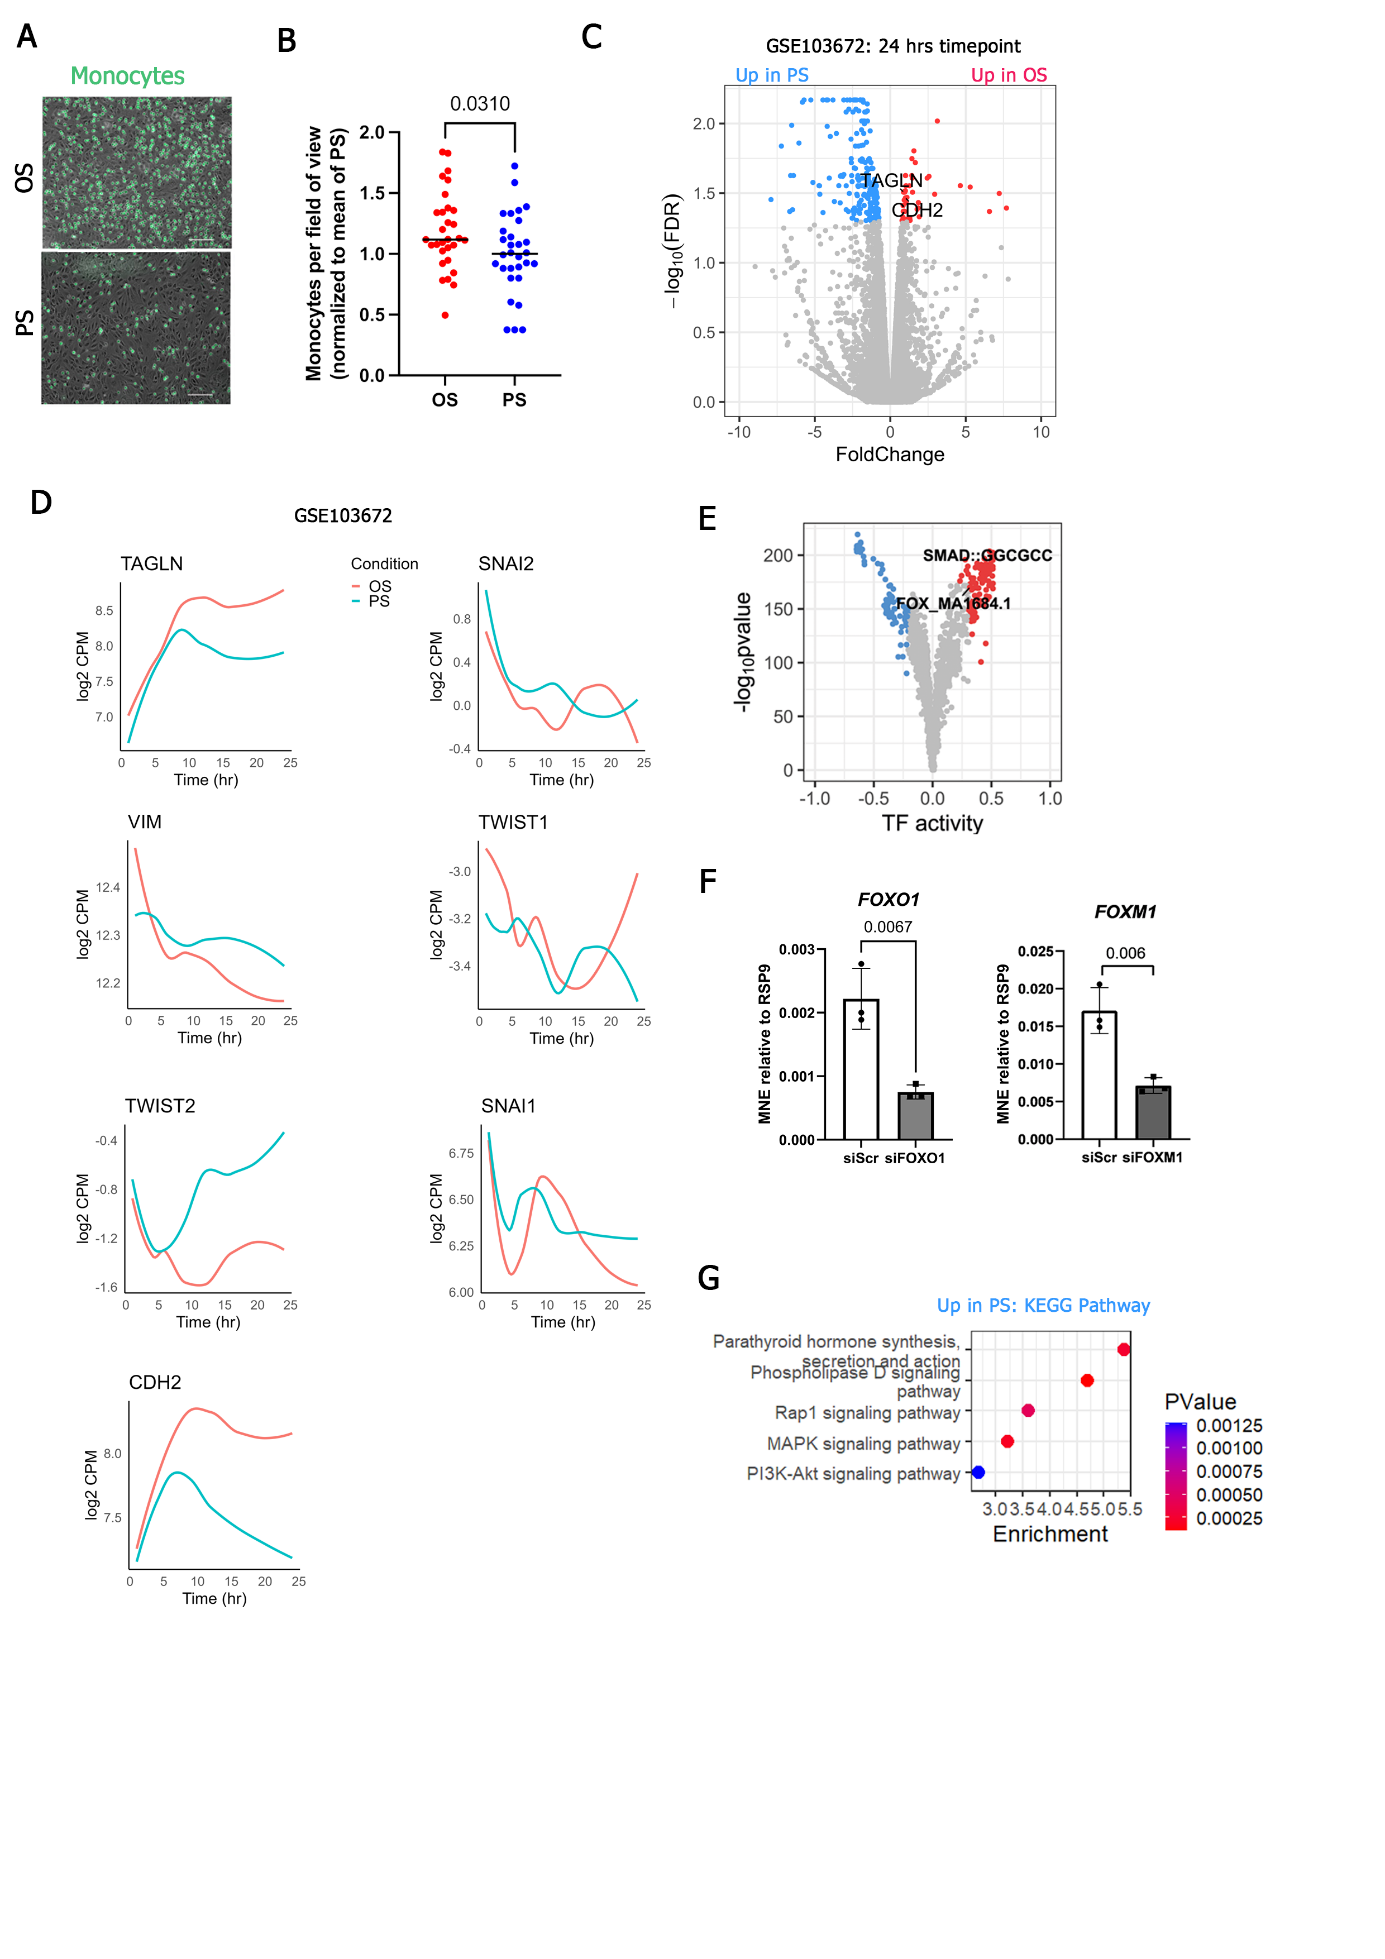
**Figure S2. A** Monocyte adhesion assay using THP-1 cells labeled in green on human aortic endothelial cell (HAoEC) monolayers exposed to oscillatory (OS) or pulsatile (PS) flow (n=3). Scale bar is 100 µm. **B** Quantification of adhered monocytes from **A**. Quantification from 10 images of 3 biological donors. Statistics were calculated using a two-tailed Student’s t-test. **C** Volcanoplot of RNA-Seq data re-analyzed from GSE103672 displaying differentially regulated genes (FDR < 0.05) of HUVECs exposed to OS or PS for 24 hrs. **D** Line plots showing expression of EndMT genes as normalized counts (log2(CPM)) from RNA-Seq data detailed in **C**. **E** Footprinting analysis using differentially accessible regions (DARs; adjusted p value < 0.05) from ATAC-Seq data. Transcription factors in color have -log10(p-value) above the 95% quantile and/or differential binding scores smaller/larger than the 5% and 95% quantiles (top 5% in each direction). Motifs for SMAD or FOX TF members are highlighted. **F** Quantitative PCR results of HAoECs exposed to OS after siRNA-mediated knock-down of FOXO1 (light grey, left) or FOXM1 (dark grey, right) compared to a scrambled control (red). (n=3). Values are depicted as mean normalized expression +/- standard error of means. Statistics were calculated as a two-tailed Student’s t-test. **G** Gene ontology enrichment analysis (KEGG pathways) of genes downregulated by OS compared to PS as assessed by RNA-Seq in HAoECs.


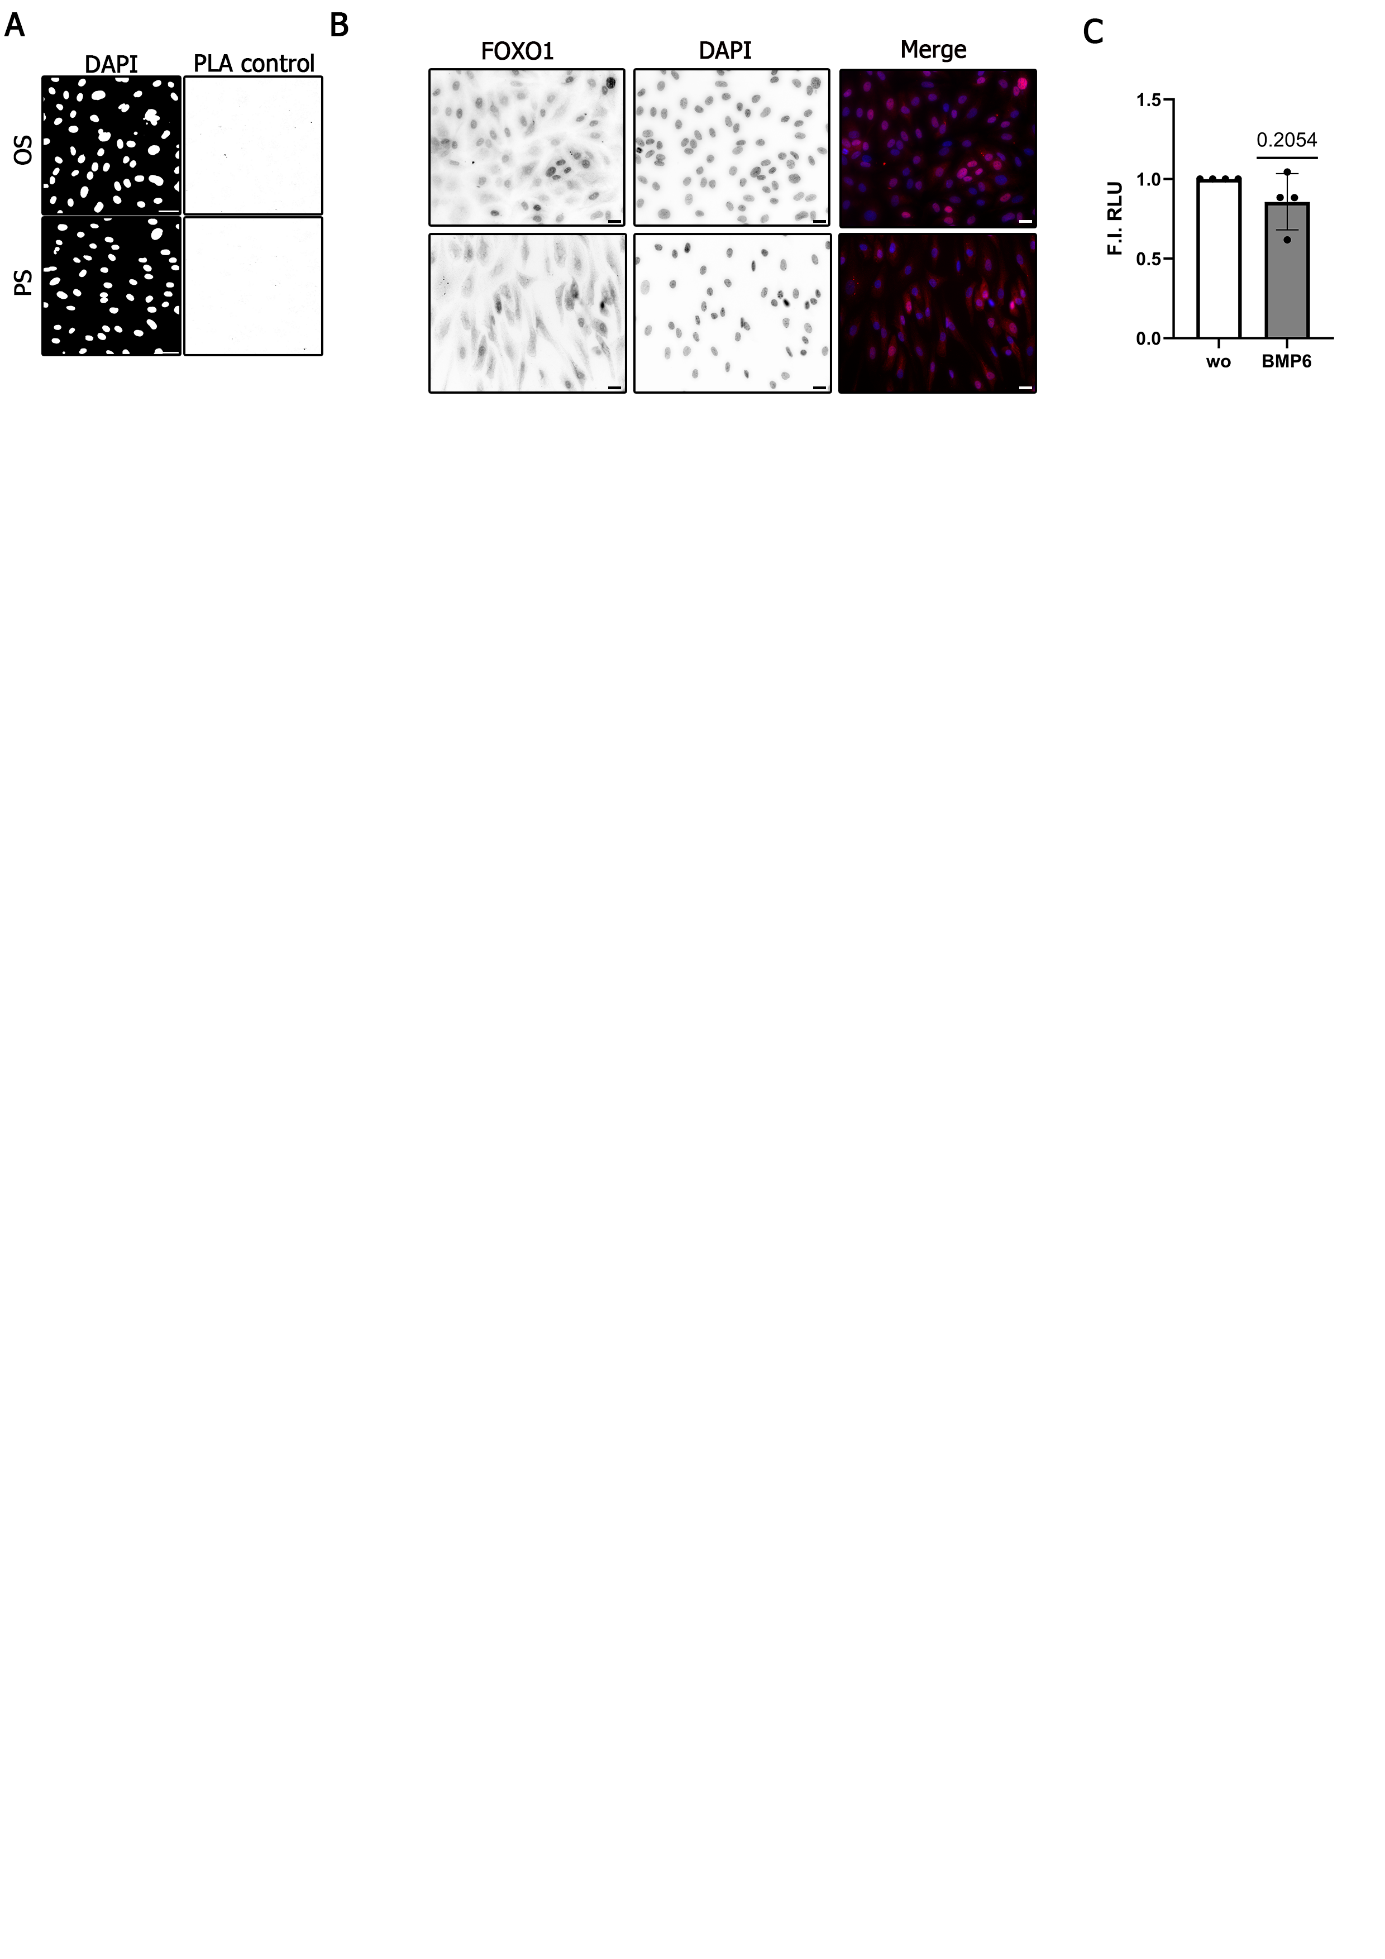
**Figure S3.** **A** Confocal images of PLA control samples of human aortic endothelial cells (HAoECs) exposed to oscillatory (OS) or pulsatile (PS) flow. PLA control slides were incubated with the secondary PLA probes only. Scale bars are 40 µm. **B** Epifluorescence microscopy images of FOXO1 immunostainings (red) in HAoECs exposed to OS or PS. Nuclei are counterstained with DAPI (blue). Representative images of 3 biological replicates with 4 images each. Scale bars are 20µm. **C** Reporter gene assay in HEK293T cells using a genomic region of the *EDN1* promoter region positive for SMAD and FOXO motifs. Values are fold inductions of BMP6 stimulation compared to solvent control (n=4). Statistics were calculated using a one sample t test with the theoretical mean set to 1.


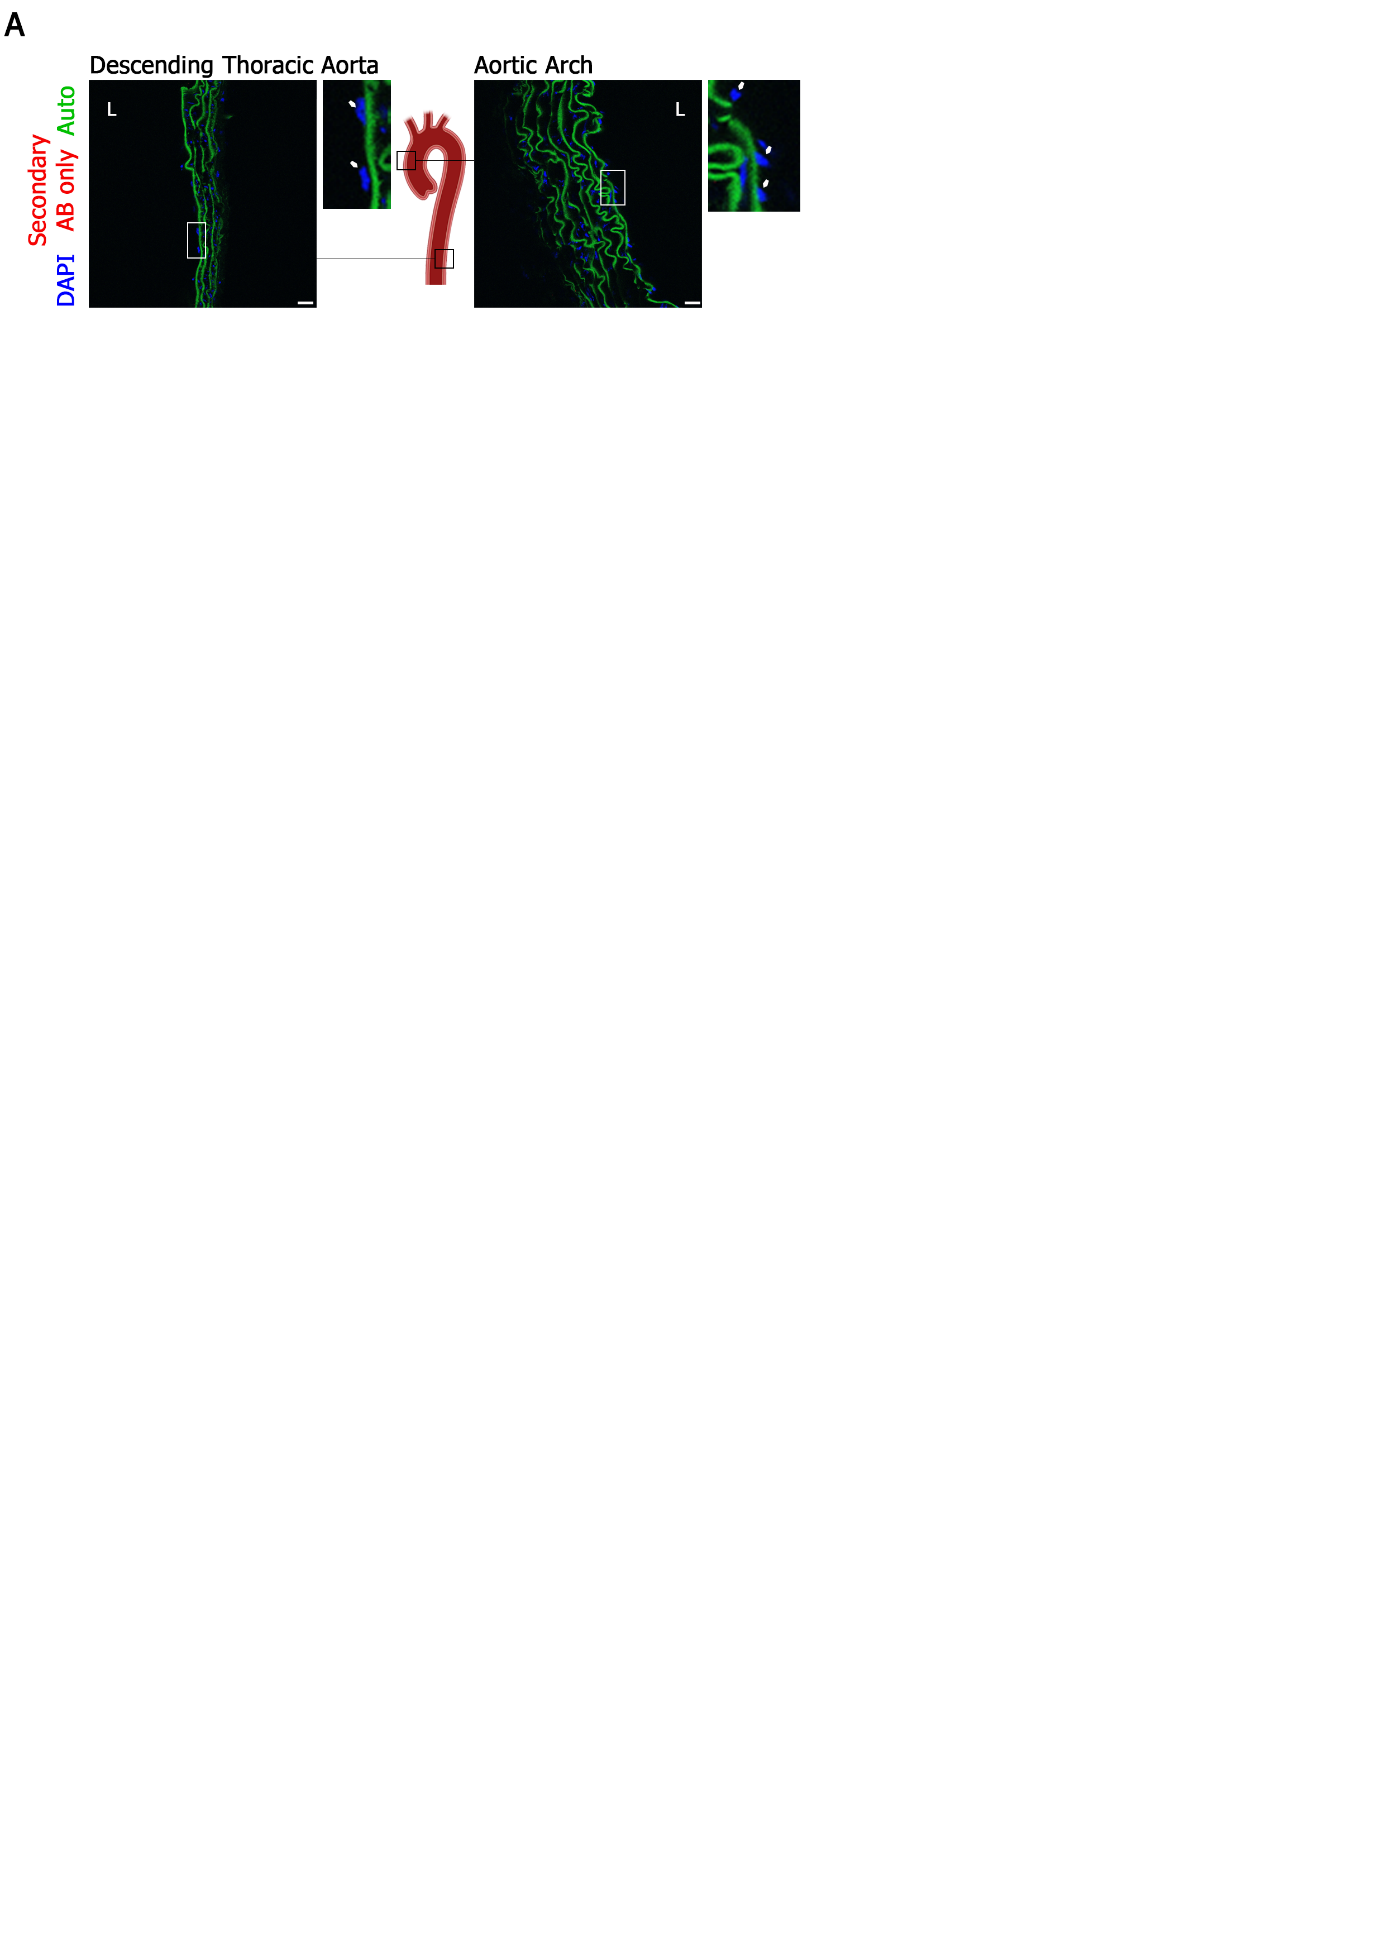
**Figure S4. A** Confocal images of immunostainings in the aortic arch or thoracic aorta of wild-type C57BL/6 mice using secondary antibody only (n=3 mice). White arrows indicate EC nuclei. Lumen is indicated by a white L. Scale bars are 20 µm.


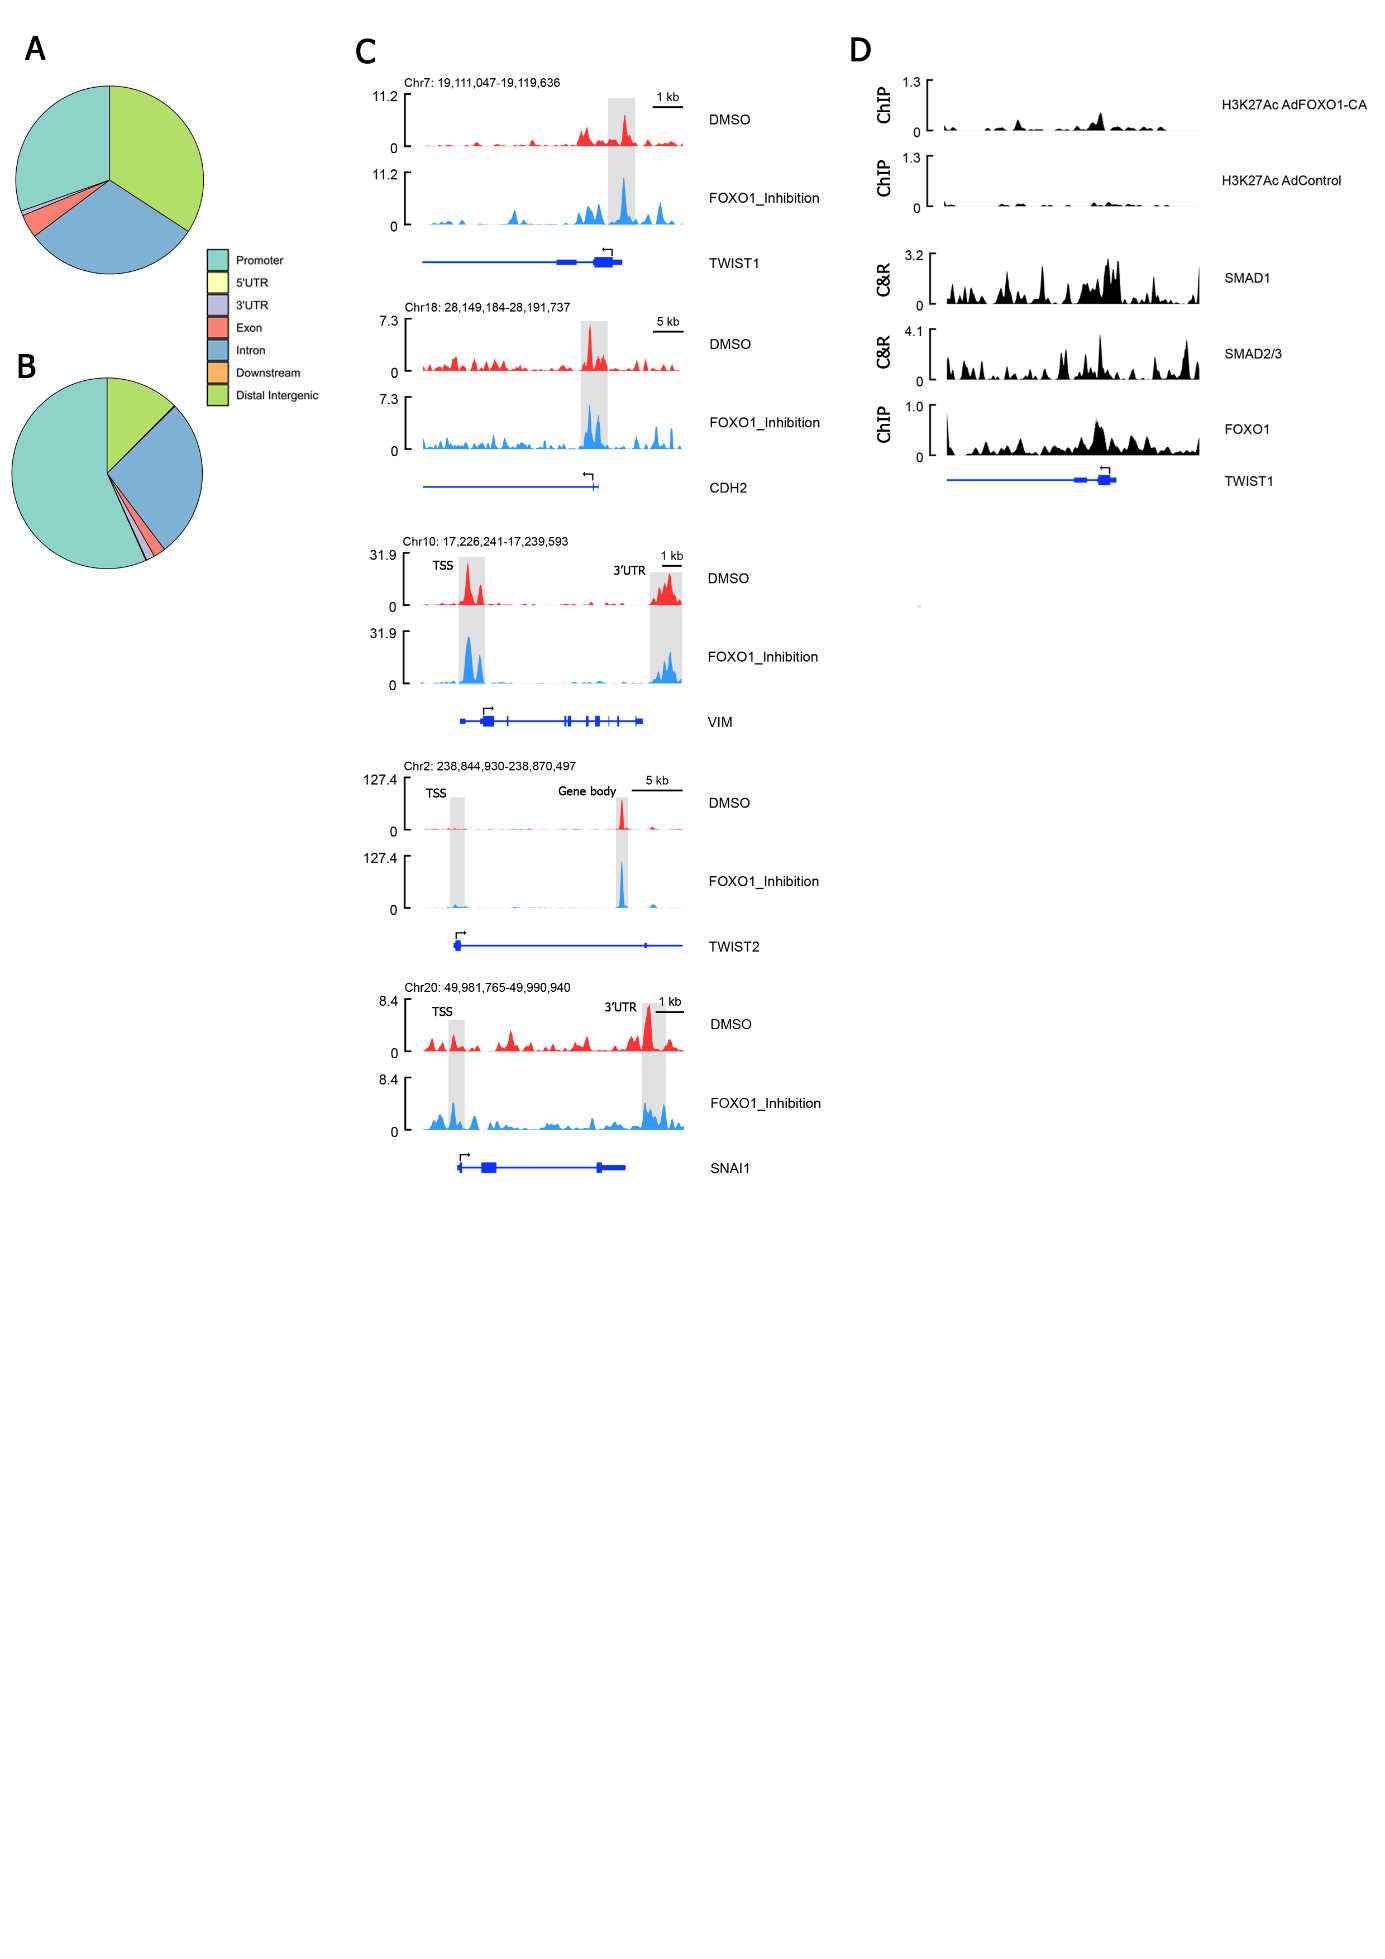
**Figure S5.** **A,B** Pie chart of annotations for called ATAC-Seq peaks from human aortic endothelial cells (HAoECs) exposed to oscillatory flow (OS) in the presence of DMSO (**A**) or a FOXO1 inhibitor (AS1842856; 0.5 µM) (**B**). **C** Genome browser view of ATAC-Seq data from HAoECs exposed to OS in the presence of AS1842856 or DMSO as a control. Regions highlighted in grey have been used for testing of differential accessibility in figure 5. **D** Genome browser view of SMAD1; SMAD2/3 CUT&RUN of BMP9 stimulated HAoECs, and ChIP-Seq of FOXO1 and histone 3 lysine 27 acetylation (H3K27Ac) in human umbilical vein ECs (HUVECs) upon overexpression of constitutively active FOXO1 (FOXO1, H3K27Ac) or an empty control vector (H3K27Ac) (GSE128635).
